# Supplementary material for: A synthetic methodology toward π-extended porphyrin-rylenediimide conjugates
Source: Royal Society of Chemistry journal article supplement (doi:10.1039/d4ra08045a), 2025-01-01
Supplement: d4ra08045a1.pdf [file d4ra08045a1.pdf]

## Table of Content

|                                                                |             |
|----------------------------------------------------------------|-------------|
| <b>1 General Information.....</b>                              | <b>S2</b>   |
| <b>2 Synthetic Procedures.....</b>                             | <b>S3</b>   |
| <b>2.1 Synthesis of Phenyl-Fused Porphyrin-Precursor.....</b>  | <b>S3</b>   |
| <b>2.2 Synthesis of Pyrene-Fused Porphyrin-Precursor .....</b> | <b>S8</b>   |
| <b>2.3 Synthesis of HBC-Fused Porphyrin-Precursor.....</b>     | <b>S11</b>  |
| <b>2.4 Synthesis of Naphthalene- and Perylenediimides.....</b> | <b>S15</b>  |
| <b>2.5 Synthesis of Donor-Acceptor Dyads .....</b>             | <b>S20</b>  |
| <b>2.6 Synthesis of Donor-Acceptor-Donor Triads .....</b>      | <b>S27</b>  |
| <b>3 Spectral Appendix .....</b>                               | <b>S33</b>  |
| <b>4 DFT Calculations .....</b>                                | <b>S144</b> |
| <b>5 References .....</b>                                      | <b>S158</b> |

# 1 General Information

All chemicals were purchased from Sigma-Aldrich and used without any further purification. Solvents were distilled prior to usage. Dichloromethane was neutralized with  $K_2CO_3$  before distillation. Thin layer chromatography (TLC) was performed on Merck silica gel 60 F524, detected by UV-light (254 nm, 366 nm). Column chromatography and flash column chromatography were performed on Macherey-Nagel silica gel 60 M (deactivated, 230–400 mesh, 0.04–0.063 mm). NMR spectroscopy was performed on Bruker Avance Neo Cryo-Probe DCH ( $^1H$ : 600 MHz,  $^{13}C$ : 150 MHz), Bruker Avance Neo 500 ( $^1H$ : 500 MHz,  $^{13}C$ : 126 MHz) and Bruker Avance 400 ( $^1H$ : 400 MHz,  $^{13}C\{^1H\}$ : 101 MHz). Deuterated solvents were purchased from Sigma-Aldrich and used as received. Chemical shifts are referenced to residual protic impurities in the solvents ( $^1H$ :  $CHCl_3$ : 7.24 ppm) and ( $^1H$ :  $CH_2Cl_2$ : 5.32 ppm) or the deuterated solvent itself ( $^{13}C\{^1H\}$ :  $CDCl_3$ : 77.0 ppm) and ( $^{13}C\{^1H\}$ :  $CD_2Cl_2$ : 53.8 ppm). The resonance multiplicities are indicated as “s” (singlet), “d” (doublet), “t” (triplet), “q” (quartet) and “m” (multiplet). Signals referred to as “bs” (broad singlet) are not clearly resolved or significantly broadened. IR spectra were recorded on a Bruker FT-IR Tensor 27 spectrometer with a Pike MIRacle ATR unit. LDI/MALDI-ToF mass spectrometry was performed on a Bruker Ultraflex Extreme machine. In case of MALDI, the following matrices were used: 2,5-dihydroxybenzoic acid (DHB) or *trans*-2-[3-(4-*tert*-butylphenyl)-2-methyl-2-propenyl-idene]malononitrile (DCTB). High-resolution mass spectrometry (MS) was performed on an ESI/APPI-ToF mass spectrometer Bruker maXis 4G UHR MS/MS spectrometer, a Bruker micrOTOF II focus TOF MS spectrometer, or on a MALDI-ToF Bruker Ultraflex Extreme spectrometer. Microwave reactions were carried out in a monomode microwave reactor Biotage Initiator+ with an external IR surface temperature sensor. The microwave-assisted reactions were carried out exclusively in the fixed hold-time mode using an external IR temperature sensor. UV/vis spectroscopy was carried out on a Varian Cary 5000 UV–vis–NIR spectrometer.

## 2 Synthetic Procedures

### 2.1 Synthesis of Phenyl-Fused Porphyrin-Precursor

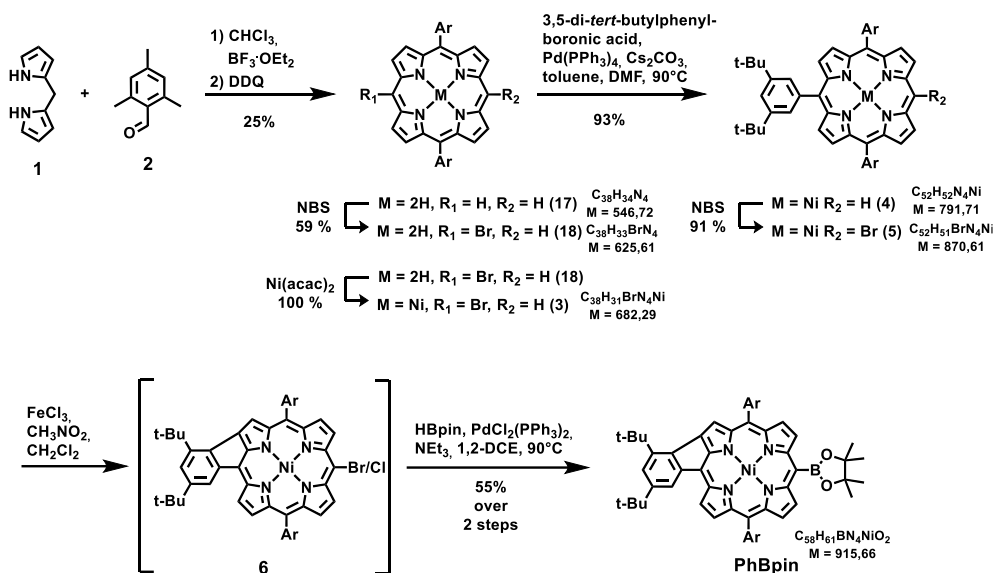

**Scheme S1.** Synthesis of phenyl-fused porphyrin building block **PhBpin**. Ar = mesityl.

### 5,15-Dimesitylporphyrin 17

Adapting a procedure from Chen *et al.*,<sup>[1]</sup> Ethanol (4.5 mL) stabilized  $\text{CHCl}_3$  (600 mL) was degassed for 15 min (bubbling  $\text{N}_2$  through the solution). Dipyrromethane **1** (890 mg, 6.00 mmol, 1 equiv) and mesitaldehyde **2** (885  $\mu\text{L}$ , 6.00 mmol, 1 equiv) were added to the solution, and the reaction was degassed for another 10 min.  $\text{BF}_3 \cdot \text{OEt}_2$  (500  $\mu\text{L}$ ) was added, and the solution was stirred for 3 h at rt under the exclusion of light. DDQ (2.04 g, 9.00 mmol, 3 equiv) was added, and the mixture was stirred for a further 30 min. The acid was quenched via the addition of  $\text{NEt}_3$  (8 mL), and the solvent was removed under reduced pressure. The crude was purified by filtration through silica ( $\text{SiO}_2$ , hexanes/ $\text{CH}_2\text{Cl}_2$ , 1:1,  $\varnothing$  13 x 8 cm). The product **17** was obtained as a purple crystalline solid in 25% yield (407 mg, 744  $\mu\text{mol}$ ).

**$^1\text{H}$  NMR (400 MHz,  $\text{CD}_2\text{Cl}_2$ , rt):  $\delta$  [ppm]:** 10.25 (s, 2H), 9.37 (d,  $J = 4.6$  Hz, 4H), 8.86 (d,  $J = 4.6$  Hz, 4H), 7.35 (s, 4H), 2.66 (s, 6H), 1.84 (s, 12H), -3.13 (s, 2H).

**$^{13}\text{C}\{^1\text{H}\}$  NMR (101 MHz,  $\text{CDCl}_3$ , rt):  $\delta$  [ppm]:** 139.34, 138.00, 137.47, 131.85, 129.92, 127.80, 117.31, 104.45, 21.36, 21.19.

**HRMS (MALDI, DCTB)** for  $\text{C}_{38}\text{H}_{34}\text{N}_4$  ( $\text{M}^+$ ), calcd.: 546.2778, found: 546.2793.

### Nickel-5,15-Dimesityl-10-Bromoporphyrin **3**

Adapting a procedure from Mishra *et al.*<sup>[2]</sup>, 5,15-Dimesitylporphyrin **17** (410 mg, 750  $\mu\text{mol}$ , 1 equiv) was dissolved in  $\text{CHCl}_3$  (200 mL) and pyridine (320  $\mu\text{L}$ ). The mixture was cooled to 0  $^\circ\text{C}$ , and NBS (133 mg, 750  $\mu\text{mol}$ , 1 equiv) was added. After stirring for 25 min, the reaction was quenched with acetone (10 mL). The solution was washed with  $\text{H}_2\text{O}$  (100 mL) and subsequently dried over  $\text{Na}_2\text{SO}_4$ . The crude was separated by column chromatography ( $\text{SiO}_2$ , hexanes/ $\text{CH}_2\text{Cl}_2$ , 3:1,  $\varnothing$  10 x 30 cm, 2<sup>nd</sup> band). The product was obtained as a purple crystalline solid in 59% yield (278 mg, 444  $\mu\text{mol}$ ). 5,15-Dimesityl-10-Bromoporphyrin **18** (226 mg, 361  $\mu\text{mol}$ , 1 equiv) and  $\text{Ni}(\text{acac})_2$  (464 mg, 1.81 mmol, 5 equiv) were dissolved in toluene (40 mL). The mixture was heated to reflux for 6 h (heat-on temperature: 140  $^\circ\text{C}$ ). The solvent was removed under reduced pressure, and the crude was purified by silica plug filtration ( $\text{SiO}_2$ ,  $\text{CH}_2\text{Cl}_2$ ,  $\varnothing$  3.5 cm x 12 cm). After removal of the solvent, the residue was dissolved in  $\text{CH}_2\text{Cl}_2$  (10 mL), and the product precipitated with MeOH (50 mL). The precipitate was filtered off and dried *in vacuo*. The product **3** was obtained as a red-brown solid in 100% yield (246 mg, 361  $\mu\text{mol}$ ).

**$^1\text{H}$  NMR (400 MHz,  $\text{CD}_2\text{Cl}_2$ , rt):  $\delta$  [ppm]:** 9.80 (s, 1H), 9.55 (d,  $J = 4.9$  Hz, 2H), 9.10 (d,  $J = 4.8$  Hz, 2H), 8.67 (m, 4H), 7.26 (s, 4H), 2.59 (s, 6H), 1.78 (s, 12H).

**$^{13}\text{C}\{^1\text{H}\}$  NMR (101 MHz,  $\text{CD}_2\text{Cl}_2$ , rt):  $\delta$  [ppm]:** 143.45, 143.26, 142.85, 142.19, 138.86, 138.08, 136.72, 133.30, 132.94, 131.99, 131.85, 127.79, 117.69, 104.86, 21.12, 21.00.

**UV/Vis ( $\text{CH}_2\text{Cl}_2$ ):  $\lambda$  [nm] ( $\epsilon$  [ $\text{M}^{-1}\text{cm}^{-1}$ ]):** 409 (150000), 523 (12000).

**HRMS (MALDI, DCTB)** for  $\text{C}_{38}\text{H}_{31}\text{N}_4\text{NiBr}$  ( $\text{M}^+$ ), calcd.: 680.1080, found: 680.1070.

**TLC:  $R_f$  [%]:** 0.60 (hexanes/ $\text{CH}_2\text{Cl}_2$  4:1).

### Nickel-5,15-Dimesityl-10-(3,5-di-*tert*-butylphenyl)-Porphyrin **4**

Nickel-5,15-Dimesityl-10-Bromoporphyrin **3** (260 mg, 382  $\mu\text{mol}$ , 1 equiv), 3,5-di-*tert*-butylphenyl boronic acid (179 mg, 764  $\mu\text{mol}$ , 2 equiv),  $\text{Cs}_2\text{CO}_3$  (375 mg, 1.15 mmol, 3 equiv) and  $\text{Pd}(\text{PPh}_3)_4$  (88 mg, 76  $\mu\text{mol}$ , 0.2 equiv) were dissolved in toluene (20 mL) and DMF (10 mL) and were degassed. The reaction mixture was heated to 90 °C for 18 h. After cooling to rt, the solvent was removed under reduced pressure, and the crude was subjected to silica plug filtration (hexanes/ $\text{CH}_2\text{Cl}_2$  - 1:1,  $\varnothing$  3 x 12 cm). The product **4** was obtained in 93% yield (242 mg, 355  $\mu\text{mol}$ ).

**$^1\text{H}$  NMR (400 MHz,  $\text{CDCl}_3$ , rt):  $\delta$  [ppm]:** 9.78 (s, 1H), 9.09 (d,  $J$  = 4.7 Hz, 2H), 8.77 (d,  $J$  = 4.9, 2H), 8.71 (d,  $J$  = 4.7 Hz, 2H), 8.62 (d,  $J$  = 4.9, 2H), 7.91 (d,  $J$  = 1.8, 2H), 7.72 (m, 1H), 7.20 (s, 4H), 2.57 (s, 6H), 1.80 (s, 12H), 1.46 (s, 18H).

**$^{13}\text{C}\{^1\text{H}\}$  NMR (101 MHz,  $\text{CDCl}_3$ , rt):  $\delta$  [ppm]:** 148.80, 142.87, 142.81, 142.67, 142.49, 140.23, 139.08, 137.66, 137.42, 132.75, 132.34, 131.40, 130.79, 129.00, 127.74, 121.00, 120.42, 116.92, 104.10, 35.03, 31.70, 21.43, 21.40.

**UV/Vis ( $\text{CH}_2\text{Cl}_2$ ):  $\lambda$  [nm] ( $\epsilon$  [ $\text{M}^{-1}\text{cm}^{-1}$ ]):** 408 (225000), 521 (16000).

**HRMS (MALDI, DCTB) for  $\text{C}_{52}\text{H}_{52}\text{N}_4\text{Ni}$  ( $\text{M}^+$ ), calcd.:** 790.3540, found: 790.3529.

**TLC:  $R_f$  [%]:** 0.70 (hexanes/ $\text{CH}_2\text{Cl}_2$  3:1).

### Nickel-5,15-Dimesityl-10-(3,5-di-*tert*-butylphenyl)-20-Bromoporphyrin **5**

To a solution of  $\text{CHCl}_3$  (25 mL), pyridine (600  $\mu\text{L}$ ) and Nickel-5,15-Dimesityl-10-(3,5-di-*tert*-butylphenyl)-porphyrin **4** (300 mg, 380  $\mu\text{mol}$ , 1 equiv) NBS (68 mg, 380  $\mu\text{mol}$ , 1 equiv) in  $\text{CHCl}_3$  (7.5 mL) was added slowly at rt. The mixture was stirred for 15 min at rt before the reaction was quenched with acetone (8 mL). The solvents were removed under reduced pressure, and the crude was purified by silica plug filtration (hexanes/ $\text{CH}_2\text{Cl}_2$  - 1:1,  $\varnothing$  3 x 12 cm). The product **5** was obtained as a dark-orange solid in 91% yield (301 mg, 346  $\mu\text{mol}$ ).

**<sup>1</sup>H NMR (400 MHz, CDCl<sub>3</sub>, rt):** δ [ppm]: 9.47 (d, *J* = 4.9 Hz, 2H), 8.70 (d, *J* = 4.9 Hz, 2H), 8.63 (d, *J* = 4.9 Hz, 2H), 8.53 (d, *J* = 4.9 Hz, 2H), 7.86 (d, *J* = 1.8 Hz, 2H), 7.70 (t, *J* = 1.9 Hz, 1H), 7.20 (s, 4H), 2.56 (s, 6H), 1.80 (s, 12H), 1.45 (s, 18H).

**<sup>13</sup>C{<sup>1</sup>H} NMR (101 MHz, CDCl<sub>3</sub>, rt):** δ [ppm]: 148.95, 143.42, 142.88, 142.67, 142.36, 139.68, 138.95, 137.80, 136.91, 133.34, 133.20, 132.17, 131.42, 128.80, 127.77, 121.13, 120.61, 117.81, 101.68, 35.00, 31.65, 21.38, 21.34.

**UV/Vis (CH<sub>2</sub>Cl<sub>2</sub>):** λ [nm] (ε [M<sup>-1</sup>cm<sup>-1</sup>]): 417 (180000), 531 (13000).

**HRMS (MALDI, DCTB)** for C<sub>52</sub>H<sub>51</sub>BrN<sub>4</sub>Ni (M<sup>+</sup>), calcd.: 868.2645, found: 868.2624.

**TLC: R<sub>f</sub> [%]:** 0.80 (hexanes/CH<sub>2</sub>Cl<sub>2</sub> 3:1).

### **Fused Nickel-5,15-Dimesityl-10-(3,5-di-*tert*-butylphenyl)-20-Boronic-Ester-Porphyrin PhBpin**

A 20 mL vial was filled with a solution of Nickel-5,15-Dimesityl-10-(3,5-di-*tert*-butylphenyl)-20-bromoporphyrin **5** (100 mg, 115 μmol, 1 equiv) in CH<sub>2</sub>Cl<sub>2</sub> (20 mL) and cooled with an ice bath. The solution was degassed (bubbling N<sub>2</sub> through the solution for 15 min). The N<sub>2</sub> flow through the solution was increased, and a solution of dry FeCl<sub>3</sub> (149 mg, 920 μmol, 8 equiv) in CH<sub>3</sub>NO<sub>2</sub> (0.5 mL) was added. The N<sub>2</sub> bubbling through the solution was stopped 15 min after FeCl<sub>3</sub> was added, and the solution was stirred under slow warming to rt for 24 h. MeOH (10 mL) was added to quench the reaction. After adding NEt<sub>3</sub> (1 mL), the solvent was removed, and the crude was purified by filtration through silica (SiO<sub>2</sub>, hexanes/ CH<sub>2</sub>Cl<sub>2</sub> - 1:1, Ø 3 x 12 cm). The obtained dark-green solid was used in the next step without further purification. The porphyrin mixture **6** from the previous step, PdCl<sub>2</sub>(PPh<sub>3</sub>)<sub>2</sub> (4.2 mg, 5.9 μmol, 0.05 equiv) and NEt<sub>3</sub> (0.4 mL) were dissolved in dry 1,2 dichloroethane (10 mL) in a 20 mL microwave vial. The vial was sealed, and the reaction mixture was degassed before pinacolborane (142 μL, 983 μmol, 8.33 equiv) was added via a syringe. The reaction mixture was stirred for 18 h at 90 °C under the exclusion of light. The solvent was removed under reduced pressure, and the crude product was subjected to column chromatography (SiO<sub>2</sub>, hexanes/CH<sub>2</sub>Cl<sub>2</sub> - 4:1 → 2:1, Ø 7 x 25 cm, 3<sup>rd</sup> band). **PhBpin** was obtained in 55% yield over the two reaction steps (58 mg, 63 μmol).

**<sup>1</sup>H NMR (400 MHz, CD<sub>2</sub>Cl<sub>2</sub>, rt):** δ [ppm]: 9.27 (d, *J* = 4.9 Hz, 1H), 9.21 (d, *J* = 4.9 Hz, 1H), 9.12 (d, *J* = 5.0 Hz, 1H), 8.45 (d, *J* = 4.9 Hz, 1H), 8.26 (d, *J* = 4.9 Hz, 2H), 7.97 (d, *J* = 1.7 Hz, 1H), 7.68 (s, 1H), 7.22 (d, *J* = 4.4 Hz, 4H), 7.04 (d, *J* = 1.6 Hz, 1H), 2.57 (s, 6H), 1.92 (s, 6H), 1.82 (s, 6H), 1.68 (s, 12H), 1.56 (s, 9H), 1.47 (s, 9H).

**<sup>13</sup>C{<sup>1</sup>H} NMR (151 MHz, CD<sub>2</sub>Cl<sub>2</sub>, rt):** δ [ppm]: 153.88, 153.02, 150.91, 148.84, 147.77, 147.65, 147.17, 146.54, 145.26, 144.71, 144.17, 140.40, 139.16, 138.94, 138.27, 138.18, 137.42, 135.91, 134.52, 133.74, 133.46, 132.32, 131.38, 130.59, 128.12, 127.39, 126.27, 123.45, 121.50, 121.15, 117.85, 113.96, 85.51, 35.51, 35.32, 31.17, 29.01, 25.30, 21.53, 21.49, 21.46, 21.33.

**UV/Vis (CH<sub>2</sub>Cl<sub>2</sub>):** λ [nm] (*ε* [M<sup>-1</sup>cm<sup>-1</sup>]): 377 (39000), 437 (93000), 572 (9000), 620 (6000)

**HRMS (MALDI, DCTB)** for C<sub>58</sub>H<sub>61</sub>BN<sub>4</sub>NiO<sub>2</sub> (M<sup>+</sup>), calcd.: 914.4236, found: 914.4235.

**TLC: R<sub>f</sub> [%]:** 0.40 (hexanes/CH<sub>2</sub>Cl<sub>2</sub> 2:1).

## 2.2 Synthesis of Pyrene-Fused Porphyrin-Precursor

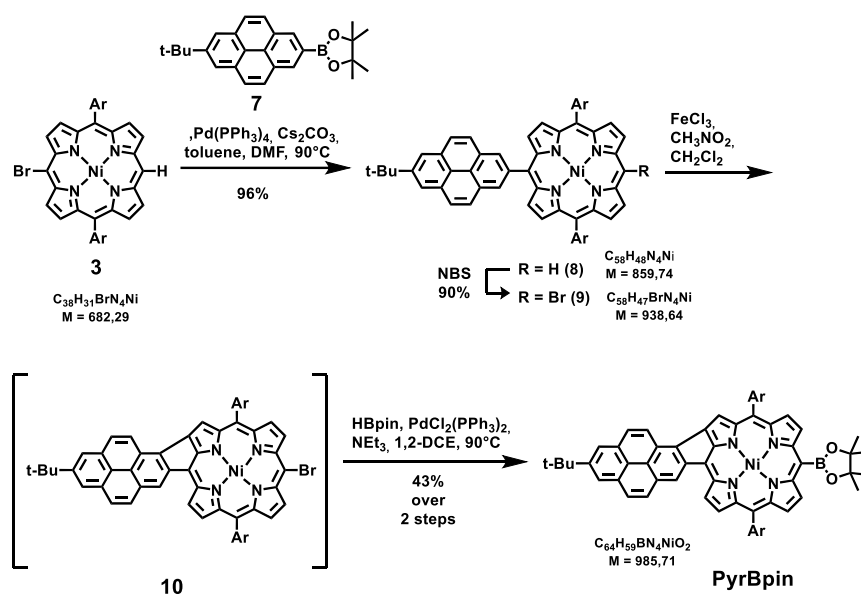

**Scheme S2.** Synthesis of pyrene-fused porphyrin building block **PyrBpin**. Ar = mesityl.

### Nickel-5,15-Dimesityl-10-(2-*tert*-butyl-Pyrene)-Porphyrin **8**

Nickel-5,15-Dimesityl-10-Bromoporphyrin **3** (160 mg, 235  $\mu\text{mol}$ , 1 equiv), 2-(7-(*tert*-butyl)pyren-2-yl)-4,4,5,5-tetramethyl-1,3,2-dioxaborolane **7\*** (108 mg, 281  $\mu\text{mol}$ , 1.2 equiv), Cs<sub>2</sub>CO<sub>3</sub> (229 mg, 704  $\mu\text{mol}$ , 3 equiv) and Pd(PPh<sub>3</sub>)<sub>4</sub> (54 mg, 47  $\mu\text{mol}$ , 0.2 equiv) were dissolved in toluene (12 mL) and DMF (6 mL) and were degassed. The reaction mixture was heated to 90 °C for 18 h. After cooling to rt, the solvent was removed under reduced pressure, and the crude was subjected to silica plug filtration (hexanes/CH<sub>2</sub>Cl<sub>2</sub> - 1:1,  $\varnothing$  3 x 12 cm). The product **8** was obtained in 96% yield (194 mg, 226  $\mu\text{mol}$ ).

**<sup>1</sup>H NMR (400 MHz, CDCl<sub>3</sub>, rt):**  $\delta$  [ppm]: 9.83 (s, 1H), 9.12 (d,  $J$  = 4.7 Hz, 2H), 8.85 (s, 2H), 8.76 (d,  $J$  = 4.8 Hz, 2H), 8.68 (d,  $J$  = 4.9 Hz, 2H), 8.64 (d,  $J$  = 4.9 Hz, 2H), 8.36 (s, 2H), 8.23 (d,  $J$  = 9.0 Hz, 2H), 8.17 (d,  $J$  = 9.0 Hz, 2H), 7.23 (s, 4H), 2.58 (s, 6H), 1.83 (s, 12H), 1.67 (s, 9H).

**<sup>13</sup>C{<sup>1</sup>H} NMR (101 MHz, CDCl<sub>3</sub>, rt):**  $\delta$  [ppm]: 149.43, 143.14, 142.98, 142.75, 142.73, 139.04, 138.58, 137.68, 137.33, 132.74, 132.44, 131.44, 131.21, 130.94, 130.04, 129.26, 128.62, 127.74, 127.39, 124.01, 122.94, 122.65, 119.16, 117.23, 104.40, 35.35, 32.00, 21.39, 21.38.



**UV/Vis (CH<sub>2</sub>Cl<sub>2</sub>):**  $\lambda$  [nm] ( $\epsilon$  [M<sup>-1</sup>cm<sup>-1</sup>]): 324 (38000), 339 (36000), 410 (254000), 521 (23000).

**HRMS (MALDI, DCTB)** for C<sub>58</sub>H<sub>48</sub>N<sub>4</sub>Ni (M<sup>+</sup>), calcd.: 858.3227, found: 858.3236.

**TLC: R<sub>f</sub> [%]:** 0.70 (hexanes/CH<sub>2</sub>Cl<sub>2</sub> 3:1).

\*Synthesized according to [3]

### **Nickel-5,15-Dimesityl-10-(2-*tert*-butyl-Pyrene)-20-Bromoporphyrin 9**

To a solution of CHCl<sub>3</sub> (20 mL), pyridine (300  $\mu$ L) and Nickel-5,15-Dimesityl-10-(2-*tert*-butyl-pyrene)-porphyrin **8** (192 mg, 223  $\mu$ mol, 1 equiv) NBS (43 mg, 223  $\mu$ mol, 1 equiv) in CHCl<sub>3</sub> (4.5 mL) was added slowly at rt. The mixture was stirred for 15 min at rt before the reaction was quenched with acetone (5 mL). The solvents were removed under reduced pressure, and the crude was purified by silica plug filtration (hexanes/CH<sub>2</sub>Cl<sub>2</sub> - 1:1,  $\emptyset$  3 x 12 cm). The product **9** was obtained as a dark-orange solid in 90% yield (189 mg, 201  $\mu$ mol)

**<sup>1</sup>H NMR (400 MHz, CDCl<sub>3</sub>, rt):**  $\delta$  [ppm]: 9.50 (d,  $J$  = 4.9 Hz, 2H), 8.77 (s, 2H), 8.64 (d,  $J$  = 5.0 Hz, 2H), 8.57 (d,  $J$  = 4.9 Hz, 2H), 8.51 (d,  $J$  = 4.9 Hz, 2H), 8.33 (s, 2H), 8.22 (d,  $J$  = 9.0 Hz, 2H), 8.16 (d,  $J$  = 8.9 Hz, 2H), 7.19 (s, 4H), 2.54 (s, 6H), 1.80 (s, 12H), 1.63 (s, 9H).

**<sup>13</sup>C{<sup>1</sup>H} NMR (101 MHz, CDCl<sub>3</sub>, rt):**  $\delta$  [ppm]: 143.75, 143.15, 142.77, 142.51, 138.95, 138.00, 137.85, 136.86, 133.46, 133.19, 132.23, 131.59, 131.20, 129.89, 129.36, 128.70, 127.79, 127.33, 122.72, 118.13, 32.00, 21.38, 21.33.

**UV/Vis (CH<sub>2</sub>Cl<sub>2</sub>):**  $\lambda$  [nm] ( $\epsilon$  [M<sup>-1</sup>cm<sup>-1</sup>]): 324 (34000), 339 (35000), 420 (281000), 531 (22000).

**HRMS (MALDI, DCTB)** for C<sub>58</sub>H<sub>47</sub>BrN<sub>4</sub>Ni (M<sup>+</sup>), calcd.: 936.2332, found:936.2340.

**TLC: R<sub>f</sub> [%]:** 0.75 (hexanes/CH<sub>2</sub>Cl<sub>2</sub> 3:1).

## Fused Nickel-5,15-Dimesityl-10-(2-*tert*-butyl-Pyrene)-20-Boronic-Ester-Porphyrin PyrBpin

A 20 mL vial was filled with a solution of Nickel-5,15-Dimesityl-10-(2-*tert*-butyl-pyrene)-20-Bromoporphyrin **9** (40 mg, 43  $\mu\text{mol}$ , 1 equiv) in  $\text{CH}_2\text{Cl}_2$  (15 mL) and cooled with an ice bath. The solution was degassed (bubbling  $\text{N}_2$  through the solution for 15 min). The  $\text{N}_2$  flow through the solution was increased, and a solution of dry  $\text{FeCl}_3$  (55 mg, 341  $\mu\text{mol}$ , 8 equiv) in  $\text{CH}_3\text{NO}_2$  (0.5 mL) was added. The  $\text{N}_2$  bubbling through the solution was stopped 15 min after  $\text{FeCl}_3$  was added, and the solution was stirred under slow warming to rt for 1 h. MeOH (10 mL) was added to quench the reaction. After adding  $\text{NEt}_3$  (1 mL), the solvent was removed, and the crude was purified by filtration through silica ( $\text{SiO}_2$ , hexanes/  $\text{CH}_2\text{Cl}_2$  - 1:1,  $\varnothing$  3 x 12 cm). The obtained dark-brown solid was used in the next step without further purification. The porphyrin mixture **10** from the previous step,  $\text{PdCl}_2(\text{PPh}_3)_2$  (1.5 mg, 2.2  $\mu\text{mol}$ , 0.05 equiv) and  $\text{NEt}_3$  (0.2 mL) were dissolved in dry 1,2 dichloroethane (5 mL) in a 20 mL microwave vial. The vial was sealed, and the reaction mixture was degassed before pinacolborane (52  $\mu\text{L}$ , 358  $\mu\text{mol}$ , 8.33 equiv) was added via a syringe. The reaction mixture was stirred for 4 h at 90  $^\circ\text{C}$  under the exclusion of light. The solvent was removed under reduced pressure, and the crude product was subjected to column chromatography ( $\text{SiO}_2$ , hexanes/ $\text{CH}_2\text{Cl}_2$  - 4:1  $\rightarrow$  2:1,  $\varnothing$  7 x 25 cm). **PyrBpin** was obtained in 43% yield over the two reaction steps (18 mg, 18  $\mu\text{mol}$ ).

**$^1\text{H}$  NMR (601 MHz,  $\text{CD}_2\text{Cl}_2$ , rt):  $\delta$  [ppm]:** 9.31 - 9.30 (m, 1H), 9.25 - 9.23 (m, 1H), 9.19 - 9.18 (m, 1H), 8.65 - 8.63 (m, 1H), 8.49 (d,  $J = 4.8$  Hz, 1H), 8.28 - 8.26 (m, 2H), 8.11 - 8.09 (m, 1H), 8.05 (m, 1H), 8.02 (m, 1H), 7.98 - 7.95 (m, 1H), 7.92 - 7.89 (m, 2H), 7.88 - 7.85 (m, 1H), 7.27 (s, 2H), 7.24 (s, 2H), 2.61 (s, 3H), 2.58 (s, 3H), 1.97 (s, 6H), 1.84 (s, 6H), 1.69 (s, 9H), 1.55 (s, 12H).

**$^{13}\text{C}\{^1\text{H}\}$  NMR (151 MHz,  $\text{CD}_2\text{Cl}_2$ , rt):  $\delta$  [ppm]:** 155.66, 150.01, 147.90, 147.57, 147.48, 147.40, 145.73, 145.23, 144.64, 141.27, 139.15, 139.01, 138.35, 138.23, 137.37, 136.06, 134.62, 133.84, 133.06, 132.89, 132.34, 131.77, 131.52, 130.73, 129.44, 128.24, 128.19, 128.14, 127.73, 127.48, 126.53, 124.82, 124.62, 123.86, 123.59, 122.01, 121.87, 118.28, 114.01, 31.79, 30.04, 30.01, 25.28, 23.06, 21.53, 21.49, 21.34, 21.11, 14.24.

**UV/Vis (CH<sub>2</sub>Cl<sub>2</sub>):**  $\lambda$  [nm] ( $\epsilon$  [M<sup>-1</sup>cm<sup>-1</sup>]): 338 (30000), 401 (47000), 474 (71000), 498 (74000), 586 (10000), 634 (7000).

**HRMS (MALDI, DCTB)** for C<sub>64</sub>H<sub>57</sub>BN<sub>4</sub>NiO<sub>2</sub> (M<sup>+</sup>), calcd.: 982.3923, found: 982.3935.

**TLC: R<sub>f</sub> [%]:** 0.25 (hexanes/CH<sub>2</sub>Cl<sub>2</sub> 3:1).

## 2.3 Synthesis of HBC-Fused Porphyrin-Precursor

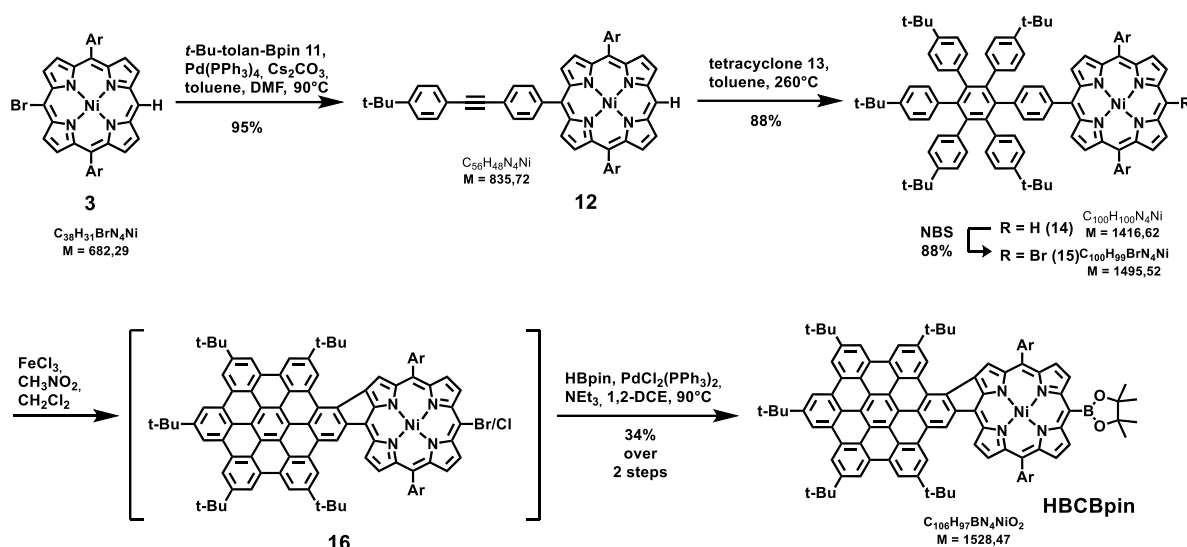

**Scheme S3.** Synthesis of HBC-fused porphyrin building block **HBCBpin**. Ar = mesityl.

## Nickel-5,15-Dimesityl-10-(*tert*-butyl-Tolane)-Porphyrin **12**

Nickel-5,15-Dimesityl-10-Bromoporphyrin **3** (277 mg, 406  $\mu$ mol, 1 equiv), 2-(4-((4-(*tert*-butyl)phenyl)ethynyl)phenyl)-4,4,5,5-tetramethyl-1,3,2-dioxaborolane **11\*** (175 mg, 487  $\mu$ mol, 1.2 equiv), Cs<sub>2</sub>CO<sub>3</sub> (398 mg, 1.22 mmol, 3 equiv) and Pd(PPh<sub>3</sub>)<sub>4</sub> (94 mg, 81  $\mu$ mol, 0.2 equiv) were dissolved in toluene (24 mL) and DMF (12 mL) and were degassed. The reaction mixture was heated to 90 °C for 18 h. After cooling to rt, the solvent was removed under reduced pressure, and the crude was subjected to silica plug filtration (hexanes/CH<sub>2</sub>Cl<sub>2</sub> - 1:1,  $\emptyset$  3 x 12 cm). The product **12** was obtained in 95% yield (322 mg, 386  $\mu$ mol).

**<sup>1</sup>H NMR (400 MHz, CDCl<sub>3</sub>, rt):** δ [ppm]: 9.80 (s, 1H), 9.10 (d, *J* = 4.7 Hz, 2H), 8.76 - 8.72 (m, 4H), 8.66 (d, *J* = 4.9 Hz, 2H), 8.06 - 8.02 (m, 2H), 7.86 - 7.82 (m, 2H), 7.61 - 7.57 (m, 2H), 7.45 - 7.43 (m, 2H), 7.23 (s, 4H), 2.59 (s, 6H), 1.80 (s, 12H), 1.36 (s, 9H).

**<sup>13</sup>C{<sup>1</sup>H} NMR (101 MHz, CDCl<sub>3</sub>, rt):** δ [ppm]: 151.73, 142.97, 142.71, 142.30, 141.20, 139.04, 137.72, 137.27, 133.71, 133.04, 132.49, 132.11, 131.47, 131.22, 131.04, 129.96, 127.76, 125.45, 125.32, 122.92, 120.24, 118.19, 117.18, 116.37, 104.42, 90.57, 88.70, 31.22, 31.18, 21.41, 21.35.

**UV/Vis (CH<sub>2</sub>Cl<sub>2</sub>):** λ [nm] (ε [M<sup>-1</sup>cm<sup>-1</sup>]): 291 (44000), 408 (235000), 521 (17000).

**HRMS (MALDI, DCTB)** for C<sub>56</sub>H<sub>48</sub>N<sub>4</sub>Ni (M<sup>+</sup>), calcd.: 834.3227, found:834.3244.

**TLC: R<sub>f</sub> [%]:** 0.70 (hexanes/CH<sub>2</sub>Cl<sub>2</sub> 2:1).

\*Synthesized according to [4]

#### **Nickel-5-15-Dimesityl-10-HAB-Porphyrin 14**

A pressure tube was charged with tetracyclone **13**\* (874 mg, 1.44 mmol, 4 equiv), **12** (300 mg, 359 μmol, 1 equiv) and Ph<sub>2</sub>O (2 mL). The mixture was heated for 28 h at 220 °C. After removal of the solvent, the residue was dissolved in CH<sub>2</sub>Cl<sub>2</sub> (10 mL), and the product was precipitated via the addition of MeOH (50 mL). The precipitate was filtered off and dried *in vacuo*. **11** was obtained as a red-brown solid in 88% yield (448 mg, 316 μmol).

**<sup>1</sup>H NMR (400 MHz, CDCl<sub>3</sub>, rt):** δ [ppm]: 9.74 (s, 1H), 9.05 (d, *J* = 4.7 Hz, 2H), 8.66 (d, *J* = 4.7 Hz, 2H), 8.48 (d, *J* = 4.9 Hz, 2H), 8.37 (d, *J* = 4.9 Hz, 2H), 7.50 - 7.46 (m, 2H), 7.21 (s, 4H), 7.11 - 7.03 (m, 6H), 6.96 - 6.92 (m, 4H), 6.90 - 6.83 (m, 6H), 6.82 - 6.77 (m, 6H), 2.59 (s, 6H), 1.74 (s, 12H), 1.22 (s, 18H), 1.13 (s, 18H), 1.12 (s, 9H).

**<sup>13</sup>C{<sup>1</sup>H} NMR (101 MHz, CDCl<sub>3</sub>, rt):** δ [ppm]: 148.01, 147.55, 147.50, 142.76, 142.54, 142.50, 142.43, 141.05, 140.77, 140.52, 140.32, 140.15, 139.03, 138.08, 137.90, 137.85, 137.59, 137.45, 137.26, 132.43, 132.22, 131.70, 131.41, 131.28, 131.16, 131.13, 130.64, 129.75, 129.64, 129.07, 127.64, 124.89, 124.55, 123.40, 123.15, 123.13, 119.14, 116.84, 34.25, 34.10, 34.08, 31.35, 31.22, 21.42, 21.26.

**UV/Vis (CH<sub>2</sub>Cl<sub>2</sub>):** λ [nm] (ε [M<sup>-1</sup>cm<sup>-1</sup>]): 408 (200000), 521 (17000).

**HRMS (MALDI, DCTB)** for  $C_{100}H_{100}N_4Ni$  ( $M^+$ ), calcd.: 1414.7296, found: 1414.7270.

**TLC: R<sub>f</sub> [%]:** 0.60 (hexanes/ $CH_2Cl_2$  2:1).

\*Synthesized according to [5]

### **Nickel-5-15-Dimesityl-10-HAB-20-Bromoporphyrin 15**

To a solution of  $CHCl_3$  (30 mL), pyridine (720  $\mu$ L) and Nickel-5-15-Dimesityl-10-HAB-porphyrin **14** (475 mg, 335  $\mu$ mol) NBS (60 mg, 335  $\mu$ mol) in  $CHCl_3$  (5 mL) was added slowly at rt. The mixture was stirred for 15 min at rt before the reaction was quenched with acetone (5 mL). The solvents were removed under reduced pressure, and the crude was purified by silica plug filtration (hexanes/ $CH_2Cl_2$  - 1:1,  $\emptyset$  3 x 12 cm). The product **15** was obtained as a dark-orange solid in 88% yield (441 mg, 295  $\mu$ mol)

**$^1H$  NMR (400 MHz,  $CDCl_3$ , rt):  $\delta$  [ppm]:** 9.43 (d,  $J$  = 5.0 Hz, 2H), 8.56 (d,  $J$  = 4.9 Hz, 2H), 8.38 (d,  $J$  = 4.9 Hz, 2H), 8.28 (d,  $J$  = 4.9 Hz, 2H), 7.45 - 7.40 (m, 2H), 7.21 - 7.17 (m, 4H), 7.10 - 7.06 (m, 2H), 7.06 - 7.02 (m, 4H), 6.95 - 6.91 (m, 4H), 6.89 - 6.84 (m, 6H), 6.80 - 6.74 (m, 6H), 2.57 (s, 6H), 1.75 (s, 12H), 1.21 (s, 18H), 1.13 (s, 18H), 1.12 (s, 9H).

**$^{13}C\{^1H\}$  NMR (101 MHz,  $CDCl_3$ , rt):  $\delta$  [ppm]:** 148.00, 147.58, 147.52, 143.15, 142.85, 142.50, 142.26, 141.22, 140.81, 140.53, 140.28, 140.05, 138.93, 138.06, 137.87, 137.81, 137.77, 136.87, 136.77, 133.26, 132.89, 132.08, 131.57, 131.39, 131.30, 131.15, 131.11, 129.88, 127.69, 123.39, 123.16, 123.13, 119.33, 117.75, 34.25, 34.10, 34.08, 31.34, 31.22, 21.41, 21.23.

**UV/Vis ( $CH_2Cl_2$ ):  $\lambda$  [nm] ( $\epsilon$  [ $M^{-1}cm^{-1}$ ]):** 417 (256000), 531 (22000).

**HRMS (MALDI, DCTB)** for  $C_{100}H_{99}BrN_4Ni$  ( $M^+$ ), calcd.: 1492.6401, found: 1492.6404.

**TLC: R<sub>f</sub> [%]:** 0.60 (hexanes/ $CH_2Cl_2$  2:1).

### **Fused Nickel-5-15-Dimesityl-10-HBC-20-Boronic-Ester-Porphyrin HBCBpin**

A 20 mL vial was filled with a solution of Nickel-5-15-Dimesityl-10-HAB-20-bromoporphyrin **15** (100 mg, 67  $\mu$ mol, 1 equiv) in  $CH_2Cl_2$  (20 mL) and cooled with an ice bath. The solution was degassed (bubbling  $N_2$  through the solution for 15 min). The

N<sub>2</sub> flow through the solution was increased, and a solution of dry FeCl<sub>3</sub> (325 mg, 2.01 mmol, 30 equiv) in CH<sub>3</sub>NO<sub>2</sub> (1 mL) was added. The N<sub>2</sub> bubbling through the solution was stopped 15 min after FeCl<sub>3</sub> was added, and the solution was stirred under slow warming to rt for 48 h. MeOH (10 mL) was added to quench the reaction. After adding NEt<sub>3</sub> (1 mL), the solvent was removed, and the crude was purified by filtration through silica (SiO<sub>2</sub>, hexanes/ CH<sub>2</sub>Cl<sub>2</sub> - 1:1, Ø 3 x 12 cm). The obtained dark-brown solid was used in the next step without further purification. The porphyrin mixture **16** from the previous step, PdCl<sub>2</sub>(PPh<sub>3</sub>)<sub>2</sub> (2.2 mg, 3.2 µmol, 0.05 equiv.) and NEt<sub>3</sub> (0.4 mL) were dissolved in dry 1,2 dichloroethane (10 mL) in a 20 mL microwave vial. The vial was sealed, and the reaction mixture was degassed before pinacolborane (77 µL, 529 µmol, 8.33 equiv) was added via a syringe. The reaction mixture was stirred for 18 h at 90 °C under the exclusion of light. The solvent was removed under reduced pressure, and the crude product was subjected to column chromatography (SiO<sub>2</sub>, hexanes/CH<sub>2</sub>Cl<sub>2</sub> - 4:1 → 2:1, Ø 7 x 35 cm). **HBCBpin** was obtained in 34% yield over the two reaction steps (35 mg, 23 µmol).

**<sup>1</sup>H NMR (601 MHz, CD<sub>2</sub>Cl<sub>2</sub>, rt):** δ [ppm]: 9.84 - 9.76 (m, 3H), 9.61 (d, *J* = 4.9 Hz, 1H), 9.41 (s, 1H), 9.36 - 9.33 (m, 5H), 9.29 (d, *J* = 4.8 Hz, 1H), 9.28 - 9.27 (m, 1H), 9.25 - 9.22 (m, 2H), 8.65 (d, *J* = 4.8 Hz, 1H), 8.42 (s, 1H), 8.34 - 8.33 (m, 2H), 7.29 (s, 2H), 7.24 (s, 2H), 2.62 (s, 3H), 2.60 (s, 3H), 1.96 (s, 6H), 1.92 - 1.90 (m, 15H), 1.84 (s, 18H), 1.71 (s, 9H), 1.58 (s, 9H).

**<sup>13</sup>C{<sup>1</sup>H} NMR (151 MHz, CD<sub>2</sub>Cl<sub>2</sub>, rt):** δ [ppm]: 155.50, 149.96, 149.85, 149.56, 149.25, 149.23, 148.26, 147.87, 146.87, 145.72, 145.12, 144.70, 140.94, 139.20, 138.76, 138.40, 138.35, 137.41, 135.93, 134.72, 134.09, 133.92, 132.66, 131.70, 131.50, 131.06, 131.05, 130.93, 130.85, 130.83, 130.73, 130.64, 130.45, 130.42, 128.66, 128.52, 128.18, 127.35, 125.09, 124.18, 124.12, 124.05, 123.89, 123.75, 123.05, 122.36, 121.70, 121.29, 121.24, 121.21, 121.13, 120.98, 120.68, 119.74, 119.67, 119.64, 119.59, 119.56, 119.47, 119.43, 119.37, 118.53, 113.71, 54.16, 36.05, 32.35, 32.06, 30.05, 25.31, 21.60, 21.39.

**UV/Vis (CH<sub>2</sub>Cl<sub>2</sub>):** λ [nm] (ε [M<sup>-1</sup>cm<sup>-1</sup>]): 379 (84000), 437 (64000), 509 (83000), 594 (14000), 641 (11000).

**HRMS (MALDI, DCTB)** for C<sub>106</sub>H<sub>97</sub>BN<sub>4</sub>NiO<sub>2</sub> (M<sup>+</sup>), calcd.: 1526.7053, found: 1562.7027.

TLC: R<sub>f</sub> [%]: 0.40 (hexanes/CH<sub>2</sub>Cl<sub>2</sub> 3:1).

## 2.4 Synthesis of Naphthalene- and Perylenediimides

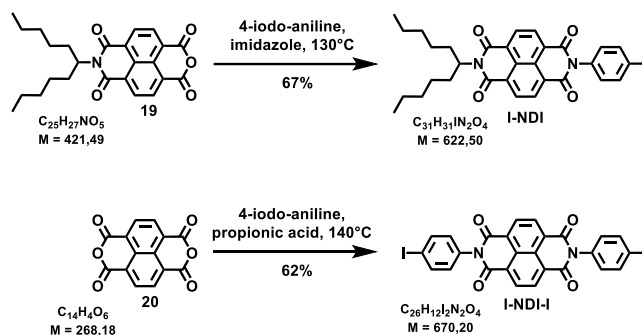

**Scheme S4.** Synthesis of halogenated naphthalenediimides.

### Iodo-Phenyl-Naphthalenediimide I-NDI

To a 20 mL microwave vial, naphthalenemonoimide **19**\* (100 mg, 237  $\mu$ mol), 4-iodo-aniline (78 mg, 356  $\mu$ mol, 1.5 equiv) and imidazole (1.00 g) were added, and the vial was sealed and evacuated and refilled with nitrogen three times. Then, the reaction mixture was heated to 130 °C. When the imidazole was fully molten, the reaction mixture was stirred at 130 °C for 2 h. Following, aqueous HCl (2M, 15 mL) was added, and the reaction was stirred at room temperature overnight. Then, the formed precipitate was collected *via* filtration, and the solid residue was washed with H<sub>2</sub>O until neutrality and dried *in vacuo*, yielding the desired **I-NDI** as a beige solid (99 mg, 159  $\mu$ mol, 67%).

**<sup>1</sup>H NMR (400 MHz, CDCl<sub>3</sub>, rt):**  $\delta$  [ppm]: 8.85 - 8.72 (m, 4H), 7.95 - 7.86 (m, 2H), 7.12 - 7.02 (m, 2H), 5.22 - 5.12 (m, 1H), 2.28 - 2.15 (m, 2H), 1.93 - 1.80 (m, 2H), 1.37 - 1.17 (m, 12H), 0.84 (t,  $J$  = 6.8 Hz, 6H).

**<sup>13</sup>C{<sup>1</sup>H} NMR (101 MHz, CDCl<sub>3</sub>, rt):**  $\delta$  [ppm]: 163.01, 138.93, 134.48, 131.64, 130.59, 127.16, 126.37, 95.12, 55.50, 32.36, 31.79, 26.71, 22.66, 14.14.

**UV/Vis (CH<sub>2</sub>Cl<sub>2</sub>):**  $\lambda$  [nm] ( $\epsilon$  [M<sup>-1</sup>cm<sup>-1</sup>]): 343 (14000), 360 (26000), 381 (27000).

**HRMS (APPI) for C<sub>31</sub>H<sub>32</sub>IN<sub>2</sub>O<sub>4</sub> [M+H]<sup>+</sup>, calcd.:** 623.1401, found: 623.1433.

\*Synthesized according to [6]

### Bis-Iodo-Phenyl-Naphthalenediimide I-NDI-I

Adapting a procedure from Spittler *et al.*,<sup>[7]</sup> in a 20 mL microwave vial, naphthalenetetracarboxylic dianhydride **20** (268 mg, 1.00 mmol, 1 equiv) and 4-iodo-aniline (948 mg, 4.32 mmol, 4.32 equiv) were dissolved in propionic acid (16 mL) under nitrogen atmosphere and stirred for 48 h at 140 °C. After cooling to room temperature, the then-formed precipitate was collected by filtration, and the crude product was washed with MeOH (3 x 10 mL) and hexane (20 mL) and dried *in vacuo*, yielding the desired **I-NDI-I** as a beige powder (423 mg, 623 μmol, 62%).

<sup>1</sup>H NMR (400 MHz, DMSO-d<sub>6</sub>, rt): δ [ppm]: 8.72 (s, 4H), 7.96 - 7.91 (m, 4H), 7.33 - 7.26 (m, 4H).

<sup>13</sup>C{<sup>1</sup>H} NMR (101 MHz, CDCl<sub>3</sub>, rt): δ [ppm]: *The poor solubility of the compound precluded the acquisition of a <sup>13</sup>C-NMR spectrum.*

UV/Vis (CH<sub>2</sub>Cl<sub>2</sub>): λ [nm] (ε [M<sup>-1</sup>cm<sup>-1</sup>]): 343 (16000), 359 (26000), 380 (29000).

HRMS (APPI) for C<sub>26</sub>H<sub>13</sub>I<sub>2</sub>N<sub>2</sub>O<sub>4</sub> [M+H]<sup>+</sup>, calcd.: 670.8959, found: 670.8969.

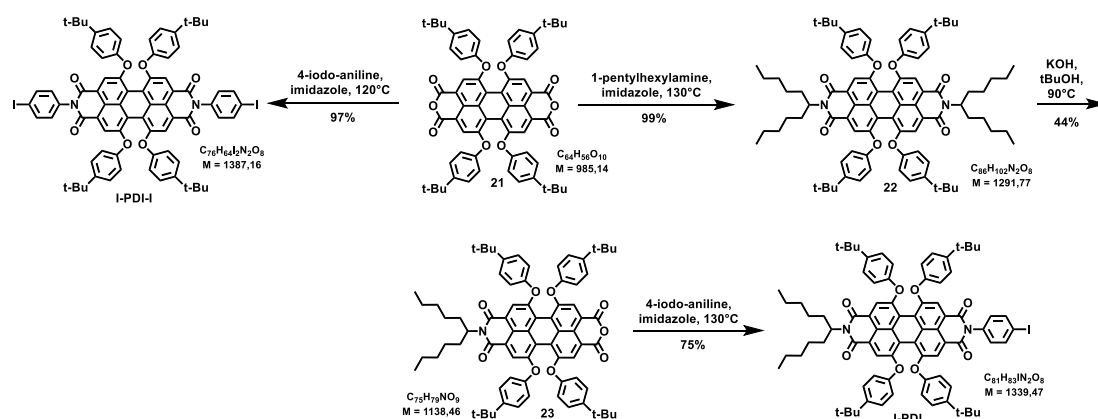

**Scheme S5.** Synthesis of halogenated perylenediimides.



### Tetra-(*tert*-butyl-phenoxy)perylene diimide **22**

In a 20 mL microwave vial, perylenebisanhydride **21**\* (100 mg, 101  $\mu$ mol, 1 equiv), 1-pentylhexylamine (86.5 mg, 505  $\mu$ mol, 5 equiv) and Imidazole (1.00 g) were added and the vial was evacuated and refilled with nitrogen three times. Then, the reaction mixture was heated to 130 °C and was stirred once the imidazole was molten for 4 h. Subsequently, aqueous HCl (1M, 10 mL) was added, and the reaction was stirred at room temperature overnight. The formed precipitate was collected by filtration and washed with water until neutrality. Drying *in vacuo* yielded the desired perylene diimide **22** as a red solid (130 mg, 100  $\mu$ mol, 99%).

**<sup>1</sup>H NMR (400 MHz, CDCl<sub>3</sub>, rt):**  $\delta$  [ppm]: 8.21 (d, *J* = 10.9 Hz, 4H), 7.25 - 7.20 (m, 8H), 6.90 - 6.79 (m, 8H), 5.13 - 5.03 (m, 2H), 2.21 - 2.04 (m, 4H), 1.85 - 1.70 (m, 4H), 1.29 (s, 36H), 1.27 - 1.13 (m, 24H), 0.85 - 0.73 (m, 12H).

**<sup>13</sup>C{<sup>1</sup>H} NMR (101 MHz, CDCl<sub>3</sub>, rt):**  $\delta$  [ppm]: 156.08, 152.96, 147.34, 133.01, 126.79, 122.48, 120.50, 120.36, 120.32, 119.86, 54.87, 34.51, 32.56, 31.88, 31.62, 26.77, 22.69, 14.18.

**HRMS (APPI)** for C<sub>86</sub>H<sub>102</sub>N<sub>2</sub>O<sub>8</sub> [M+H]<sup>+</sup>, calcd.: 1291.7709, found: 1291.7716.

\*Synthesized according to [8]

### Tetra-(*tert*-butyl-phenoxy)perylene monoimide **23**

In a 100 mL round-bottom flask equipped with a condenser, perylene diimide **22** (124 g, 96  $\mu$ mol, 1 equiv) and KOH (16.2 mg, 288  $\mu$ mol, 3 equiv) were dissolved in *t*BuOH (15 mL). The reaction mixture was stirred at 90 °C for 3 h. Following, the mixture was allowed to cool to room temperature, and subsequently, AcOH (3 mL) and aqueous HCl (1M, 15 mL) were added, and the mixture was stirred overnight. The formed precipitate was collected via filtration and washed with H<sub>2</sub>O until neutrality. The obtained solid was further purified by silica gel plug filtration (SiO<sub>2</sub>, hexanes/CH<sub>2</sub>Cl<sub>2</sub> - 1:1  $\rightarrow$  1:2), eluting the desired product as the second fraction. Evaporation of the solvents afforded **23** as a red powder (48 mg, 42  $\mu$ mol, 44%)

**<sup>1</sup>H NMR (400 MHz, CDCl<sub>3</sub>, rt):** δ [ppm]: 8.25 - 8.18 (m, 4H), 7.25 - 7.22 (m, 8H), 6.88 - 6.77 (m, 8H), 5.13 - 5.00 (m, 1H), 2.20 - 2.04 (m, 2H), 1.84 - 1.72 (m, 2H), 1.29 (s, 36H), 1.26 - 1.15 (m, 12H), 0.86 - 0.76 (m, 6H).

**<sup>13</sup>C{<sup>1</sup>H} NMR (101 MHz, CDCl<sub>3</sub>, rt):** δ [ppm]: 160.21, 156.81, 155.90, 152.78, 152.64, 147.85, 147.70, 133.31, 133.28, 126.96, 126.90, 122.46, 121.92, 121.74, 119.59, 119.44, 118.04, 77.48, 77.16, 76.84, 55.01, 34.55, 31.86, 31.60, 31.58, 26.77, 22.68, 14.17.

**HRMS (APPI)** for C<sub>75</sub>H<sub>79</sub>NO<sub>9</sub> [M+H]<sup>+</sup>, calcd.: 1138.5828, found: 1138.5814.

### **Tetra-(*tert*-butyl-phenoxy)-Iodo-Phenyl-Perylenebisimide I-PDI**

To a 20 mL sealable vial, perylenemonoimide **23** (45 mg, 40 μmol, 1 equiv), 4-iodoaniline (13 mg, 59 μmol, 1.5 eq.) and imidazole (500 mg) were added, and the reaction vessel was evacuated and refilled with nitrogen three times. After that, the reaction mixture was heated to 130 °C, until the imidazole was molten, and then the reaction mixture was stirred at that temperature for 3 h. Following, aqueous HCl (1M, 15 mL) was added, and the reaction was stirred at room temperature overnight. Then, the red precipitate was collected via filtration and washed with more aqueous HCl (1M, 10 mL) and subsequently with H<sub>2</sub>O until neutrality. The crude product was further purified by a silica plug filtration (SiO<sub>2</sub>, hexanes/CH<sub>2</sub>Cl<sub>2</sub> - 1:1), yielding the perylenediimide **I-PDI** as a dark purple solid (40 mg, 29.9 μmol, 75%)

**<sup>1</sup>H NMR (400 MHz, CDCl<sub>3</sub>, rt):** δ [ppm]: 8.17 (s, 1H), 8.13 - 8.04 (m, 1H), 7.87 - 7.81 (m, 2H), 7.31 - 7.22 (m, 8H), 7.06 - 6.99 (m, 2H), 6.88 - 6.80 (m, 8H), 5.09 - 5.02 (m, 1H), 2.19 - 2.07 (m, 2H), 1.81 - 1.68 (m, 2H), 1.30 (s, 18H), 1.28 (s, 18H), 1.27 - 1.19 (m, 12H), 0.84 - 0.77 (m, 6H).

**<sup>13</sup>C{<sup>1</sup>H} NMR (101 MHz, CDCl<sub>3</sub>, rt):** δ [ppm]: 163.51, 156.38, 155.99, 153.00, 147.52, 147.48, 138.60, 135.12, 133.30, 132.96, 130.70, 126.85, 126.80, 122.18, 121.35, 120.46, 119.98, 119.74, 119.52, 119.45, 94.46, 54.93, 34.52, 34.50, 32.56, 31.88, 31.61, 31.56, 26.78, 22.69, 14.18.

**UV/Vis (CH<sub>2</sub>Cl<sub>2</sub>):** λ [nm] (ε [M<sup>-1</sup>cm<sup>-1</sup>]): 452 (15000), 542 (27000), 581 (44000).

**HRMS (APPI)** for C<sub>81</sub>H<sub>84</sub>IN<sub>2</sub>O<sub>8</sub> [M+H]<sup>+</sup>, calcd.: 1339.5267, found: 1339.5282.

### **Tetra-(*tert*-butyl-phenoxy)-Bis-Iodo-Phenyl-Perylenediimide I-PDI-I**

Adapting a procedure from Schlosser *et al.*,<sup>[9]</sup> to a 10 mL sealable vial, perylenebisanhydride **21** (40 mg, 41  $\mu\text{mol}$ , 1 equiv), 4-iodo-aniline (177 mg, 8.12 mmol, 20 equiv), and imidazole (500 mg) were added, and the vessel was sealed and evacuated and refilled with nitrogen three times. Then, the reaction mixture was heated to 120 °C until the imidazole was molten and stirred at that temperature for 5 h. After that, aqueous HCl (2M, 7 mL) was added, and the mixture was stirred overnight at room temperature. Then, the formed precipitate was collected by filtration, and the solid residue was washed until neutrality. The crude product was then redissolved in DCM (50 mL), washed with aqueous HCl (2M, 2 x 100 mL) and H<sub>2</sub>O (2 x 100 mL), and dried over MgSO<sub>4</sub>. Removal of the solvent under reduced pressure gave the desired **I-PDI-I** as a dark purple powder (55 mg, 39.6  $\mu\text{mol}$ , 97%)

**<sup>1</sup>H NMR (400 MHz, CDCl<sub>3</sub>, rt):**  $\delta$  [ppm]: 8.23 (s, 4H), 7.84 - 7.80 (m, 4H), 7.25 - 7.20 (m, 8H), 7.02 - 6.97 (m, 4H), 6.86 - 6.82 (m, 8H), 1.27 (s, 36H).

**<sup>13</sup>C{<sup>1</sup>H} NMR (101 MHz, CDCl<sub>3</sub>, rt):**  $\delta$  [ppm]: 163.46, 156.28, 152.88, 147.66, 138.62, 135.07, 133.26, 130.68, 126.86, 122.48, 120.98, 120.38, 119.86, 119.46, 94.52, 34.52, 31.56.

**UV/Vis (CH<sub>2</sub>Cl<sub>2</sub>):**  $\lambda$  [nm] ( $\epsilon$  [M<sup>-1</sup>cm<sup>-1</sup>]): 454 (18000), 543 (31000), 583 (51000).

**HRMS (MALDI, DCTB)** for C<sub>76</sub>H<sub>64</sub>I<sub>2</sub>N<sub>2</sub>O<sub>8</sub> [M+H]<sup>+</sup>, calcd.: 1386.2752, found: 1386.2935.

## 2.5 Synthesis of Donor-Acceptor Dyads

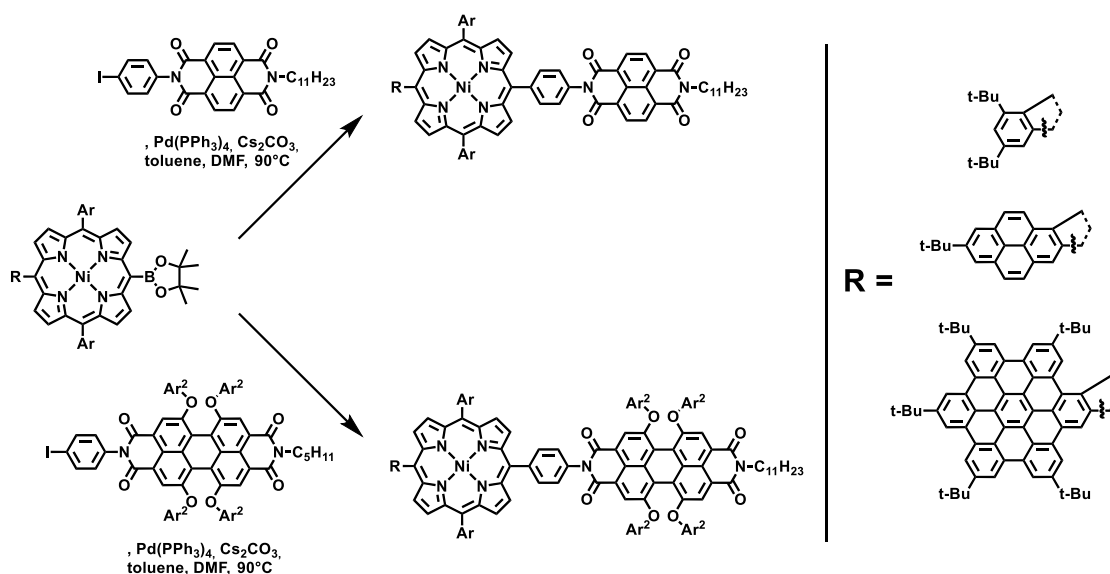

**Scheme S6.** General scheme for the Synthesis of the D-A dyads. Ar = mesityl; Ar<sup>2</sup> = 4-*t*Bu-phenyl.

### General Procedure for Synthesis of the D-A Dyads

Fused boronic-ester porphyrin, rylenediimide,  $\text{Cs}_2\text{CO}_3$ , and  $\text{Pd(PPh}_3)_4$  were dissolved in toluene and DMF and were degassed under sonication. The reaction mixture was heated to  $90^\circ\text{C}$  for 18 h. After cooling to rt, the solvent was removed under reduced pressure, and the crude was subjected to silica plug filtration (hexanes/ $\text{CH}_2\text{Cl}_2$  - 1:1,  $\varnothing$  3 x 12 cm) to remove the inorganics. The crude was further purified by size exclusion chromatography (Biobeads SX1, toluene,  $\varnothing$  5 x 120 cm). After filtration through silica (hexanes/ $\text{CH}_2\text{Cl}_2$  - 1:1,  $\varnothing$  3 x 12 cm), the product was obtained as a dark solid.

### Phenyl-Fused-Porphyrin-Naphthalenediimide Ph-NDI

Phenyl-fused boronic-ester porphyrin **PhBpin** (13 mg, 14  $\mu\text{mol}$ , 1.05 equiv), 2-(4-iodophenyl)-7-undecylbenzo[Imn][3,8]phenanthroline-1,3,6,8(2H,7H)-tetraone **I-NDI** (8.3 mg, 13  $\mu\text{mol}$ , 1 equiv),  $\text{Cs}_2\text{CO}_3$  (13 mg, 40  $\mu\text{mol}$ , 3 equiv), and  $\text{Pd(PPh}_3)_4$  (3.1 mg, 2.7  $\mu\text{mol}$ , 0.2 equiv) were dissolved in toluene (2 mL) and DMF (1 mL) and the **General Procedure for Synthesis of the D-A Dyads** was followed. **Ph-NDI** was obtained in 41% yield (6.9 mg, 5.4  $\mu\text{mol}$ ).

**<sup>1</sup>H NMR (601 MHz, CD<sub>2</sub>Cl<sub>2</sub>, rt):** δ [ppm]: 9.12 - 9.10 (m, 1H), 8.88 (d, *J* = 7.5 Hz, 2H), 8.81 (s, 2H), 8.47 - 8.45 (m, 2H), 8.39 (d, *J* = 4.8 Hz, 1H), 8.21 (d, *J* = 4.9 Hz, 1H), 8.17 (d, *J* = 4.8 Hz, 1H), 8.16 - 8.12 (m, 2H), 7.97 (d, *J* = 1.9 Hz, 1H), 7.69 (s, 1H), 7.65 - 7.60 (m, 2H), 7.25 - 7.18 (m, 4H), 7.04 (d, *J* = 1.7 Hz, 1H), 2.56 (m, 6H), 1.93 (s, 6H), 1.84 (s, 6H), 1.61 (s, 9H), 1.47 (s, 9H), 1.36 - 0.81 (m, 23H).

**<sup>13</sup>C{<sup>1</sup>H} NMR (151 MHz, CD<sub>2</sub>Cl<sub>2</sub>, rt):** δ [ppm]: 163.63, 154.79, 153.17, 150.91, 148.66, 147.91, 146.55, 145.89, 144.85, 144.53, 143.65, 141.71, 141.21, 139.11, 138.88, 138.33, 138.23, 137.32, 135.78, 135.14, 134.35, 133.98, 133.37, 133.16, 131.59, 131.01, 130.80, 130.04, 128.15, 127.69, 127.48, 127.31, 126.96, 126.64, 123.29, 122.07, 121.33, 120.97, 118.26, 113.09, 35.52, 35.34, 32.60, 32.09, 31.17, 28.98, 26.94, 22.93, 21.51, 21.47, 21.33, 14.15.

**UV/Vis (CH<sub>2</sub>Cl<sub>2</sub>):** λ [nm] (ε [M<sup>-1</sup>cm<sup>-1</sup>]): 362 (43000), 381 (57000), 441 (92000), 571 (9000), 612 (5000).

**HRMS (MALDI, DCTB)** for C<sub>83</sub>H<sub>80</sub>N<sub>6</sub>NiO<sub>4</sub> (M<sup>+</sup>), calcd.: 1282.5589, found: 1282.5566.

**TLC: R<sub>f</sub> [%]:** 0.40 (hexanes/CH<sub>2</sub>Cl<sub>2</sub> 1:1).

### Phenyl-Fused-Porphyrin-Perylenediimide Ph-PDI

Phenyl-fused boronic-ester porphyrin **PhBpin** (10 mg, 11 μmol, 1.05 equiv), 5,6,12,13-tetrakis(4-(*tert*-butyl)phenoxy)-2-(4-iodophenyl)-9-undecylanthra[2,1,9-def:6,5,10-d'e'f']diisoquinoline-1,3,8,10(2H,9H)-tetraone **I-PDI** (14 mg, 13 μmol, 1 equiv), Cs<sub>2</sub>CO<sub>3</sub> (10 mg, 31 μmol, 3 equiv) and Pd(PPh<sub>3</sub>)<sub>4</sub> (2.4 mg, 2.1 μmol, 0.2 equiv) were dissolved in toluene (2 mL) and DMF (1 mL) and the **General Procedure for Synthesis of the D-A Dyads** was followed. **Ph-PDI** was obtained in 57% yield (12 mg, 5.9 μmol).

**<sup>1</sup>H NMR (601 MHz, CD<sub>2</sub>Cl<sub>2</sub>, rt):** δ [ppm]: 9.10 (d, *J* = 5.1 Hz, 1H), 8.45 (d, *J* = 4.9 Hz, 1H), 8.40 (d, *J* = 4.9 Hz, 1H), 8.34 (d, *J* = 4.8 Hz, 1H), 8.30 (s, 2H), 8.16 (d, *J* = 4.9 Hz, 2H), 8.12 (d, *J* = 4.8 Hz, 2H), 8.08 - 8.05 (m, 2H), 7.97 (d, *J* = 1.6 Hz, 1H), 7.68 (s, 1H), 7.57 - 7.54 (m, 2H), 7.34 - 7.26 (m, 8H), 7.22 - 7.17 (m, 4H), 7.04 (d, *J* = 1.6 Hz, 1H), 6.94 - 6.85 (m, 8H), 2.55 (s, 6H), 1.91 (s, 6H), 1.81 (s, 6H), 1.56 (s, 9H), 1.47 (s, 9H), 1.32 (s, 18H), 1.30 (s, 18H), 1.28 - 0.81 (m, 23H).

**$^{13}\text{C}\{^1\text{H}\}$  NMR (601 MHz,  $\text{CD}_2\text{Cl}_2$ , rt):  $\delta$  [ppm]:** 163.87, 156.54, 156.05, 154.73, 153.64, 153.12, 150.92, 148.60, 147.87, 147.81, 147.72, 146.49, 145.85, 144.82, 144.47, 143.68, 143.67, 141.27, 141.17, 139.09, 138.86, 138.29, 138.18, 137.32, 135.78, 135.65, 134.19, 133.93, 133.62, 133.37, 133.22, 133.16, 131.06, 130.73, 130.20, 129.98, 128.13, 128.12, 127.71, 127.25, 127.03, 126.60, 123.25, 122.95, 122.02, 121.64, 121.51, 120.94, 120.80, 120.41, 120.01, 119.74, 119.72, 119.45, 118.21, 113.01, 35.51, 35.33, 34.65, 34.63, 32.67, 32.12, 31.57, 31.56, 31.17, 30.05, 28.97, 27.53, 26.90, 22.94, 21.50, 21.45, 21.31.

**UV/Vis ( $\text{CH}_2\text{Cl}_2$ ):  $\lambda$  [nm] ( $\epsilon$  [ $\text{M}^{-1}\text{cm}^{-1}$ ]):** 377 (37000), 441 (95000), 540 (34000), 580 (54000).

**HRMS (MALDI, DCTB) for  $\text{C}_{133}\text{H}_{132}\text{N}_6\text{NiO}_8$  ( $\text{M}^+$ ), calcd.:** 1998.9455, found: 1998.9482.

**TLC:  $R_f$  [%]:** 0.70 (hexanes/ $\text{CH}_2\text{Cl}_2$  1:2).

## Pyrene-Fused-Porphyrin-Naphthalenediimide Pyr-NDI

Pyrene-fused boronic-ester porphyrin **PyrBpin** (10 mg, 10  $\mu\text{mol}$ , 1.05 equiv), 2-(4-iodophenyl)-7-undecylbenzo[*lmn*][3,8]phenanthroline-1,3,6,8(2H,7H)-tetraone **I-NDI** (6.0 mg, 9.7  $\mu\text{mol}$ , 1 equiv),  $\text{Cs}_2\text{CO}_3$  (9.5 mg, 29  $\mu\text{mol}$ , 3 equiv) and  $\text{Pd}(\text{PPh}_3)_4$  (2.3 mg, 1.9  $\mu\text{mol}$ , 0.2 equiv) were dissolved in toluene (2 mL) and DMF (1 mL) and the **General Procedure for Synthesis of the D-A Dyads** was followed. **Pyr-NDI** was obtained in 34% yield (4.5 mg, 3.3  $\mu\text{mol}$ ).

**$^1\text{H}$  NMR (601 MHz,  $\text{CD}_2\text{Cl}_2$ , rt):  $\delta$  [ppm]:** 9.33 - 9.31 (m, 1H), 8.86 (d,  $J = 7.4$  Hz, 2H), 8.80 (s, 2H), 8.67 (s, 1H), 8.52 (d,  $J = 4.9$  Hz, 1H), 8.44 (d,  $J = 4.8$  Hz, 1H), 8.38 (d,  $J = 4.7$  Hz, 1H), 8.21 - 8.20 (m, 2H), 8.16 - 8.11 (m, 3H), 8.07 (d,  $J = 1.8$  Hz, 1H), 8.04 (d,  $J = 1.7$  Hz, 1H), 8.00 (d,  $J = 8.8$  Hz, 1H), 7.95 (s, 1H), 7.95 - 7.92 (m, 1H), 7.91 - 7.88 (m, 1H), 7.66 - 7.61 (m, 2H), 7.27 (s, 2H), 7.25 (s, 2H), 2.61 (s, 3H), 2.58 (s, 3H), 2.01 (s, 6H), 1.87 (s, 6H), 1.56 (s, 9H), 0.99 - 0.69 (m, 23H).

**$^{13}\text{C}\{^1\text{H}\}$  NMR (151 MHz,  $\text{CD}_2\text{Cl}_2$ , rt):  $\delta$  [ppm]:** 164.27, 163.49, 163.05, 156.23, 149.77, 147.62, 147.23, 146.99, 146.06, 145.01, 144.76, 143.85, 143.79, 141.83, 141.35, 138.90, 138.75, 138.22, 138.10, 137.06, 135.71, 134.93, 134.21, 134.18, 133.20, 132.89, 132.26, 132.00, 131.49, 131.43, 131.41, 131.17, 130.78, 130.02, 129.31, 128.06, 128.01, 127.85, 127.54, 127.30, 127.20, 127.15, 127.09, 126.64, 126.58, 126.10, 124.62, 124.28, 123.79, 123.50, 122.44, 122.14, 121.68, 121.57, 118.54, 112.93, 35.23, 32.36, 32.16, 31.96, 31.62, 29.94, 29.90, 26.80, 22.96, 22.85, 21.43, 21.38, 21.28, 14.19, 14.11.

**UV/Vis ( $\text{CH}_2\text{Cl}_2$ ):  $\lambda$  [nm] ( $\epsilon$  [ $\text{M}^{-1}\text{cm}^{-1}$ ]):** 357 (39000), 382 (47000), 400 (48000), 448 (53000), 474 (72000), 501 (75000), 586 (11000), 630 (7000), 684 (5000).

**HRMS (MALDI, DCTB) for  $\text{C}_{89}\text{H}_{76}\text{N}_6\text{NiO}_4$  ( $\text{M}^+$ ), calcd.:** 1350.5276, found: 1350.5258.

**TLC:  $R_f$  [%]:** 0.50 (hexanes/ $\text{CH}_2\text{Cl}_2$  1:2).

## Pyrene-Fused-Porphyrin-Perylenediimide Pyr-PDI

Pyrene-fused boronic-ester porphyrin **PyrBpin** (10 mg, 11  $\mu\text{mol}$ , 1.05 equiv), 5,6,12,13-tetrakis(4-(*tert*-butyl)phenoxy)-2-(4-iodophenyl)-9-undecylantra[2,1,9-def:6,5,10-d'e'f']diisoquinoline-1,3,8,10(2H,9H)-tetraone **I-PDI** (13 mg, 9.7  $\mu\text{mol}$ , 1 equiv),  $\text{Cs}_2\text{CO}_3$  (9.5 mg, 29  $\mu\text{mol}$ , 3 equiv) and  $\text{Pd}(\text{PPh}_3)_4$  (2.3 mg, 1.9  $\mu\text{mol}$ , 0.2 equiv) were dissolved in toluene (2 mL) and DMF (1 mL) and the **General Procedure for Synthesis of the D-A Dyads** was followed. **Ph-PDI** was obtained in 20% yield (4.0 mg, 1.9  $\mu\text{mol}$ ).

**$^1\text{H}$  NMR (601 MHz,  $\text{CD}_2\text{Cl}_2/\text{CS}_2$ , rt):  $\delta$  [ppm]:** 9.28 (d,  $J = 5.0$  Hz, 1H), 8.62 (s, 1H), 8.52 (d,  $J = 4.8$  Hz, 1H), 8.40 (d,  $J = 4.9$  Hz, 1H), 8.35 (d,  $J = 4.7$  Hz, 1H), 8.28 (s, 2H), 8.19 - 8.17 (m, 2H), 8.16 - 8.10 (m, 3H), 8.09 - 8.06 (m, 2H), 8.06 - 8.03 (m, 2H), 7.99 - 7.98 (m, 1H), 7.94 - 7.89 (m, 3H), 7.57 - 7.52 (m, 2H), 7.39 - 7.34 (m, 8H), 7.29 - 7.27 (m, 2H), 7.26 - 7.24 (m, 2H), 6.99 - 6.90 (m, 8H), 2.69 (s, 3H), 2.65 (s, 3H), 2.08 (s, 6H), 1.95 (s, 6H), 1.68 (s, 9H), 1.42 (m, 36H), 1.33 - 0.94 (m, 23H).

**$^{13}\text{C}\{^1\text{H}\}$  NMR (151 MHz,  $\text{CD}_2\text{Cl}_2/\text{CS}_2$ , rt):  $\delta$  [ppm]:** 164.03, 163.05, 162.86, 156.48, 156.40, 156.00, 153.42, 153.23, 153.18, 149.37, 147.68, 147.61, 147.40, 147.32, 147.20, 146.03, 145.00, 144.70, 144.07, 143.97, 141.98, 141.09, 138.90, 138.77, 138.19, 137.98, 137.36, 136.01, 135.34, 134.05, 133.85, 133.56, 133.32, 133.20, 133.08, 132.75, 132.28, 131.76, 131.38, 130.92, 130.15, 129.49, 128.44, 128.41, 128.38, 128.24, 127.88, 127.77, 127.31, 127.06, 127.04, 126.42, 124.95, 124.71, 123.87, 123.82, 123.63, 123.07, 122.94, 122.41, 122.11, 121.98, 121.79, 121.43, 121.42, 120.63, 120.38, 120.32, 120.19, 120.16, 119.85, 119.77, 119.59, 118.57, 113.37, 35.20, 34.47, 32.75, 32.47, 32.05, 31.77, 31.77, 30.51, 27.21, 23.52, 22.02, 21.98, 21.91, 21.79, 14.80.

**UV/Vis ( $\text{CH}_2\text{Cl}_2$ ):  $\lambda$  [nm] ( $\epsilon$  [ $\text{M}^{-1}\text{cm}^{-1}$ ]):** 400 (45000), 473 (69000), 501 (71000), 536 (37000), 583 (48000).

**HRMS (MALDI, DCTB) for  $\text{C}_{139}\text{H}_{128}\text{N}_6\text{NiO}_8$  ( $\text{M}^+$ ), calcd.:** 2066.9142, found: 2066.9146.

**TLC:  $R_f$  [%]:** 0.55 (hexanes/ $\text{CH}_2\text{Cl}_2$  1:1).



### HBC-Fused-Porphyrin-Naphthalenediimide HBC-NDI

HBC-fused boronic-ester porphyrin **HBCBpin** (10 mg, 6.5  $\mu\text{mol}$ , 1.05 equiv), 2-(4-iodophenyl)-7-undecylbenzo[*lmn*][3,8]phenanthroline-1,3,6,8(2H,7H)-tetraone **I-NDI** (3.9 mg, 6.2  $\mu\text{mol}$ , 1 equiv),  $\text{Cs}_2\text{CO}_3$  (6.1 mg, 19  $\mu\text{mol}$ , 3 equiv) and  $\text{Pd}(\text{PPh}_3)_4$  (1.5 mg, 1.3  $\mu\text{mol}$ , 0.2 equiv) were dissolved in toluene (2 mL) and DMF (1 mL) and the **General Procedure for Synthesis of the D-A Dyads** was followed. **HBC-NDI** was obtained in 40% yield (4.7 mg, 2.5  $\mu\text{mol}$ ).

**$^1\text{H}$  NMR (601 MHz,  $\text{CD}_2\text{Cl}_2$ , rt):  $\delta$  [ppm]:** 9.82 - 9.81 (m, 2H), 9.61 (d,  $J = 5.0$  Hz, 1H), 9.42 (s, 1H), 9.39 - 9.33 (m, 6H), 9.29 - 9.26 (m, 2H), 8.78 (d,  $J = 7.4$  Hz, 2H), 8.72 (s, 2H), 8.68 (d,  $J = 4.8$  Hz, 1H), 8.48 - 8.45 (m, 2H), 8.41 (d,  $J = 4.7$  Hz, 1H), 8.29 - 8.27 (m, 2H), 8.14 - 8.10 (m, 2H), 7.59 - 7.55 (m, 2H), 7.30 (s, 2H), 7.25 (s, 2H), 2.62 (s, 3H), 2.59 (s, 3H), 2.00 (s, 6H), 1.94 (s, 6H), 1.92 (s, 9H), 1.86 - 1.81 (m, 27H), 1.60 (s, 9H).

**$^{13}\text{C}\{^1\text{H}\}$  NMR (151 MHz,  $\text{CD}_2\text{Cl}_2$ , rt):  $\delta$  [ppm]:** 163.48, 156.35, 149.99, 149.88, 149.56, 149.24, 149.09, 146.87, 146.33, 145.37, 144.94, 144.40, 144.31, 141.76, 141.52, 139.18, 138.72, 138.48, 138.41, 137.35, 135.86, 135.13, 134.62, 134.27, 133.53, 133.38, 131.59, 131.46, 131.15, 131.13, 130.88, 130.85, 130.74, 130.63, 130.53, 130.43, 130.42, 130.19, 128.73, 128.33, 128.25, 127.72, 127.38, 127.27, 126.80, 125.08, 124.18, 124.11, 124.05, 123.89, 123.08, 122.99, 121.74, 121.24, 121.22, 121.18, 121.06, 120.91, 120.67, 119.79, 119.70, 119.64, 119.61, 119.57, 119.46, 119.40, 119.31, 119.04, 112.88, 32.36, 32.15, 32.07, 30.05, 26.94, 22.93, 21.62, 21.52, 21.50, 21.42, 14.14.

**UV/Vis ( $\text{CH}_2\text{Cl}_2$ ):  $\lambda$  [nm] ( $\epsilon$  [ $\text{M}^{-1}\text{cm}^{-1}$ ]):** 362 (83000), 381 (100000), 439 (67000), 510 (90000), 592 (17000), 638 (11000).

**HRMS (MALDI, DCTB) for  $\text{C}_{113}\text{H}_{116}\text{N}_6\text{NiO}_4$  ( $\text{M}^+$ ),** calcd.: 1894.8406, found: 1894.8384.

**TLC:  $R_f$  [%]:** 0.40 (hexanes/ $\text{CH}_2\text{Cl}_2$  1:1).

### HBC-Fused-Porphyrin-Perylenediimide HBC-PDI

HBC-fused boronic-ester porphyrin **HBCBpin** (10 mg, 6.5  $\mu\text{mol}$ , 1.05 equiv), 5,6,12,13-tetrakis(4-(*tert*-butyl)phenoxy)-2-(4-iodophenyl)-9-undecylantra[2,1,9-def:6,5,10-d'e'f']diisoquinoline-1,3,8,10(2H,9H)-tetraone **I-PDI** (8.3 mg, 6.2  $\mu\text{mol}$ , 1 equiv),  $\text{Cs}_2\text{CO}_3$  (6.1 mg, 19  $\mu\text{mol}$ , 3 equiv) and  $\text{Pd}(\text{PPh}_3)_4$  (1.5 mg, 1.3  $\mu\text{mol}$ , 0.2 equiv) were dissolved in toluene (2 mL) and DMF (1 mL) and the **General Procedure for Synthesis of the D-A Dyads** was followed. **Ph-PDI** was obtained in 68% yield (11 mg, 4.4  $\mu\text{mol}$ ).

**$^1\text{H}$  NMR (601 MHz,  $\text{CD}_2\text{Cl}_2$ , rt):  $\delta$  [ppm]:** 9.84 - 9.78 (m, 2H), 9.61 (d,  $J = 4.9$  Hz, 1H), 9.41 (s, 1H), 9.39 - 9.32 (m, 6H), 9.28 (s, 1H), 9.25 (s, 1H), 8.67 (d,  $J = 4.7$  Hz, 1H), 8.48 - 8.43 (m, 2H), 8.38 (d,  $J = 4.7$  Hz, 1H), 8.32 (s, 2H), 8.25 - 8.22 (m, 2H), 8.19 - 8.10 (m, 4H), 7.59 - 7.58 (m, 2H), 7.33 - 7.30 (m, 8H), 7.28 (s, 2H), 7.23 (s, 2H), 6.94 - 6.92 (m, 4H), 6.92 - 6.86 (m, 4H), 2.61 - 2.59 (m, 6H), 1.98 (s, 6H), 1.92 (s, 6H), 1.90 (s, 9H), 1.84 (s, 18H), 1.82 (s, 9H), 1.58 (s, 9H), 1.33 (s, 18H), 1.31 (s, 18H), 1.23 - 0.81 (m, 23H).

**$^{13}\text{C}\{^1\text{H}\}$  NMR (151 MHz,  $\text{CD}_2\text{Cl}_2$ , rt):  $\delta$  [ppm]:** 163.89, 156.54, 156.32, 156.07, 153.66, 153.41, 149.96, 149.84, 149.59, 149.22, 149.07, 147.83, 147.74, 146.82, 146.30, 145.35, 144.88, 144.45, 144.35, 141.72, 141.21, 139.16, 138.70, 138.44, 138.38, 137.35, 135.86, 135.75, 134.56, 134.22, 133.64, 133.54, 133.41, 133.23, 131.60, 131.48, 131.16, 131.08, 130.90, 130.83, 130.73, 130.65, 130.49, 130.43, 130.19, 129.71, 128.70, 128.34, 128.23, 127.80, 127.23, 127.04, 125.10, 124.18, 124.07, 123.05, 122.97, 122.94, 121.91, 121.73, 121.67, 121.27, 121.25, 121.18, 121.09, 120.94, 120.83, 120.69, 120.44, 120.02, 119.76, 119.67, 119.65, 119.60, 119.56, 119.47, 119.43, 119.40, 119.28, 118.99, 112.84, 36.05, 34.64, 32.68, 32.35, 32.15, 32.07, 31.57, 30.06, 26.91, 22.94, 21.61, 21.51, 21.48, 21.40, 14.25, 14.17.

**UV/Vis ( $\text{CH}_2\text{Cl}_2$ ):  $\lambda$  [nm] ( $\epsilon$  [ $\text{M}^{-1}\text{cm}^{-1}$ ]):** 380 (80000), 439 (70000), 511 (86000), 525 (88000), 584 (58000), 635 (11000).

**HRMS (MALDI, DCTB) for  $\text{C}_{181}\text{H}_{168}\text{N}_6\text{NiO}_8$  ( $\text{M}^+$ ), calcd.:** 2611.2272, found: 2611.2258.

**TLC:  $R_f$  [%]:** 0.50 (hexanes/ $\text{CH}_2\text{Cl}_2$  3:1).

## 2.6 Synthesis of Donor-Acceptor-Donor Triads

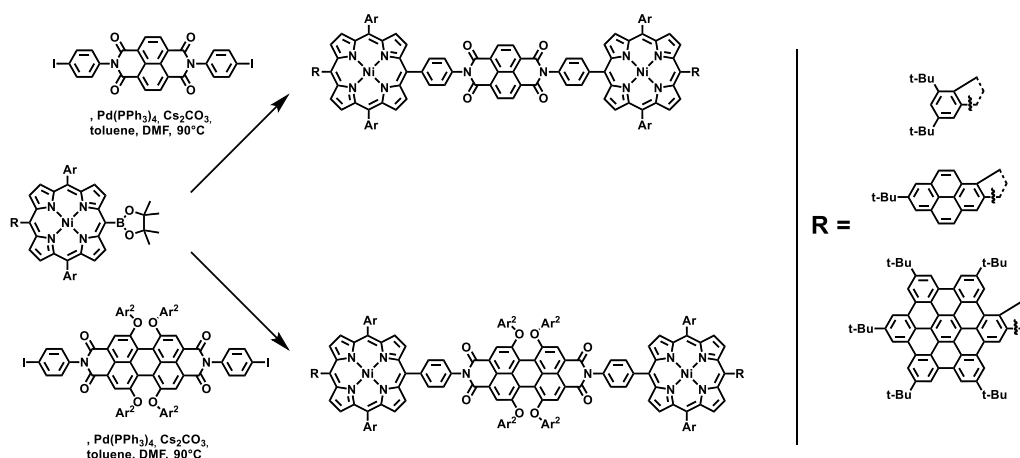

**Scheme S7.** General scheme for the Synthesis of the D-A-D Triads. Ar = mesityl; Ar<sup>2</sup> = 4-*t*Bu-phenyl.

### General Procedure for Synthesis of the D-A-D Triads

Fused boronic-ester porphyrin, rylenediimide,  $\text{Cs}_2\text{CO}_3$ , and  $\text{Pd}(\text{PPh}_3)_4$  were dissolved in toluene and DMF and were degassed under sonication. The reaction mixture was heated to  $90^\circ\text{C}$  for 18 h. After cooling to rt, the solvent was removed under reduced pressure, and the crude was subjected to silica plug filtration (hexanes/ $\text{CH}_2\text{Cl}_2$  - 1:1,  $\varnothing$  3 x 12 cm) to remove the inorganics. The crude was further purified by size exclusion chromatography (Biobeads SX1, toluene,  $\varnothing$  5 x 120 cm). After filtration through silica (hexanes/ $\text{CH}_2\text{Cl}_2$  - 1:1,  $\varnothing$  3 x 12 cm), the product was obtained as a dark solid.

### Bis-(Phenyl-Fused-Porphyrin)-Naphthalenediimide Ph-NDI-Ph

Phenyl-fused boronic-ester porphyrin **PhBpin** (10 mg, 11  $\mu\text{mol}$ , 2.1 equiv), 2,7-bis(4-iodophenyl)benzo[1,3,8]phenanthroline-1,3,6,8(2H,7H)-tetraone **I-NDI-I** (3.5 mg, 5.2  $\mu\text{mol}$ , 1 equiv),  $\text{Cs}_2\text{CO}_3$  (5.1 mg, 16  $\mu\text{mol}$ , 3 equiv), and  $\text{Pd}(\text{PPh}_3)_4$  (1.2 mg, 1.0  $\mu\text{mol}$ , 0.2 equiv) were dissolved in toluene (2 mL) and DMF (1 mL) and the **General Procedure for Synthesis of the D-A-D Triads** was followed. **Ph-NDI-Ph** was obtained in 28% yield (2.9 mg, 1.5  $\mu\text{mol}$ ).

**<sup>1</sup>H NMR (601 MHz,  $\text{CD}_2\text{Cl}_2$ , rt):**  $\delta$  [ppm]: 9.12 (d,  $J$  = 5.0 Hz, 2H), 8.98 (s, 4H), 8.49 - 8.47 (m, 4H), 8.42 (d,  $J$  = 4.7 Hz, 2H), 8.23 (d,  $J$  = 4.9 Hz, 2H), 8.20 - 8.16 (m, 6H),

7.98 (d,  $J = 1.6$  Hz, 2H), 7.70 (s, 2H), 7.69 - 7.66 (m, 4H), 7.25 - 7.21 (m, 8H), 7.05 (d,  $J = 1.6$  Hz, 2H), 2.57 (m, 12H), 1.94 (s, 12H), 1.85 (s, 12H), 1.57 (s, 18H), 1.48 (s, 18H).

$^{13}\text{C}\{^1\text{H}\}$  NMR (151 MHz,  $\text{CD}_2\text{Cl}_2$ , rt):  $\delta$  [ppm]: 163.53, 154.80, 153.18, 150.92, 148.68, 147.92, 146.57, 145.91, 144.86, 144.54, 143.66, 141.80, 141.22, 139.12, 138.89, 138.34, 138.24, 137.33, 135.79, 135.07, 134.40, 133.99, 133.38, 133.13, 131.79, 131.02, 130.83, 130.07, 128.16, 127.76, 127.70, 127.64, 127.33, 126.65, 123.30, 122.09, 121.32, 120.98, 118.28, 113.11, 35.52, 35.34, 32.29, 31.18, 30.05, 28.98, 21.52, 21.48, 21.34.

UV/Vis ( $\text{CH}_2\text{Cl}_2$ ):  $\lambda$  [nm] ( $\epsilon$  [ $\text{M}^{-1}\text{cm}^{-1}$ ]): 380 (77000), 441 (149000), 571 (15000).

HRMS (MALDI, DCTB) for  $\text{C}_{130}\text{H}_{110}\text{N}_{10}\text{Ni}_2\text{O}_4$  ( $\text{M}^+$ ), calcd.: 1990.7413, found: 1990.7429.

TLC:  $R_f$  [%]: 0.20 (hexanes/ $\text{CH}_2\text{Cl}_2$  1:2).

### Bis-(Phenyl-Fused-Porphyrin)-Perylenediimide Ph-PDI-Ph

Phenyl-fused boronic-ester porphyrin **PhBpin** (10 mg, 11  $\mu\text{mol}$ , 2.1 equiv), 5,6,12,13-tetrakis(4-(*tert*-butyl)phenoxy)-2,9-bis(4-iodophenyl)anthra[2,1,9-def:6,5,10-d'e'f']diisoquinoline-1,3,8,10(2H,9H)-tetraone **I-PDI-I** (7.2 mg, 5.2  $\mu\text{mol}$ , 1 equiv),  $\text{Cs}_2\text{CO}_3$  (5.1 mg, 16  $\mu\text{mol}$ , 3 equiv), and  $\text{Pd}(\text{PPh}_3)_4$  (1.2 mg, 1.0  $\mu\text{mol}$ , 0.2 equiv) were dissolved in toluene (2 mL) and DMF (1 mL) and the **General Procedure for Synthesis of the D-A-D Triads** was followed. **Ph-PDI-Ph** was obtained in 19% yield (2.7 mg, 1.0  $\mu\text{mol}$ ).

$^1\text{H}$  NMR (601 MHz,  $\text{CD}_2\text{Cl}_2$ , rt):  $\delta$  [ppm]: 9.10 (d,  $J = 5.0$  Hz, 2H), 8.45 (d,  $J = 4.8$  Hz, 2H), 8.41 (d,  $J = 4.8$  Hz, 2H), 8.36 - 8.32 (m, 6H), 8.17 (d,  $J = 4.8$  Hz, 2H), 8.13 (d,  $J = 4.8$  Hz, 2H), 8.09 - 8.06 (m, 4H), 7.97 (d,  $J = 1.6$  Hz, 2H), 7.69 (s, 2H), 7.59 - 7.55 (m, 4H), 7.36 - 7.32 (m, 8H), 7.21 (d,  $J = 7.2$  Hz, 8H), 7.04 (d,  $J = 1.6$  Hz, 2H), 6.97 - 6.93 (m, 8H), 2.56 - 2.55 (m, 12H), 1.92 (s, 12H), 1.82 (s, 12H), 1.56 (s, 18H), 1.47 (s, 18H), 1.32 (s, 36H).

$^{13}\text{C}\{^1\text{H}\}$  NMR (151 MHz,  $\text{CD}_2\text{Cl}_2$ , rt):  $\delta$  [ppm]: 163.87, 156.40, 154.74, 153.57, 153.13, 150.92, 148.61, 147.88, 147.85, 146.50, 145.86, 144.82, 144.48, 143.68, 141.31,

141.17, 139.09, 138.86, 138.29, 138.19, 137.33, 135.78, 135.63, 134.21, 133.94, 133.63, 133.37, 133.16, 131.06, 130.74, 129.99, 128.14, 127.72, 127.26, 127.07, 126.61, 123.26, 123.23, 122.03, 121.50, 121.38, 120.95, 120.72, 120.34, 119.57, 118.22, 113.02, 53.98, 31.57, 31.17, 28.98, 21.45, 21.32.

**UV/Vis (CH<sub>2</sub>Cl<sub>2</sub>):**  $\lambda$  [nm] ( $\epsilon$  [M<sup>-1</sup>cm<sup>-1</sup>]) = 377 (80000), 441 (196000), 542 (50000), 582 (80000).

**HRMS (MALDI, DCTB)** for C<sub>180</sub>H<sub>162</sub>N<sub>10</sub>Ni<sub>2</sub>O<sub>8</sub> (M<sup>+</sup>), calcd: 2707.1278, found: 2707.1226.

**TLC: R<sub>f</sub> [%]** = 0.20 (hexanes/CH<sub>2</sub>Cl<sub>2</sub> 1:1).

### **Bis-(Pyrene-Fused-Porphyrin)-Naphthalenediimide Pyr-NDI-Pyr**

Pyrene-fused boronic-ester porphyrin **PyrBpin** (10 mg, 10  $\mu$ mol, 2.1 equiv), 2,7-bis(4-iodophenyl)benzo[Imn][3,8]phenanthroline-1,3,6,8(2H,7H)-tetraone **I-NDI-I** (3.2 mg, 4.8  $\mu$ mol, 1 equiv), Cs<sub>2</sub>CO<sub>3</sub> (4.7 mg, 14  $\mu$ mol, 3 equiv), and Pd(PPh<sub>3</sub>)<sub>4</sub> (1.1 mg, 1.0  $\mu$ mol, 0.2 equiv) were dissolved in toluene (2 mL) and DMF (1 mL) and the **General Procedure for Synthesis of the D-A-D Triads** was followed. **Pyr-NDI-Pyr** was obtained in 21% yield (2.1 mg, 1.0  $\mu$ mol).

**<sup>1</sup>H NMR (601 MHz, CD<sub>2</sub>Cl<sub>2</sub>/CS<sub>2</sub>, rt):**  $\delta$  [ppm]: 9.28 (d,  $J$  = 4.9 Hz, 2H), 8.99 (s, 2H), 8.61 (s, 2H), 8.52 (d,  $J$  = 4.8 Hz, 2H), 8.43 (d,  $J$  = 4.7 Hz, 2H), 8.38 (s, 2H), 8.22 - 8.21 (m, 4H), 8.15 (s, 2H), 8.11 (s, 2H), 8.04 (s, 2H), 8.01 (s, 2H), 7.92 - 7.89 (m, 6H), 7.66 - 7.63 (m, 4H), 7.35 (s, 4H), 7.27 (s, 4H), 7.25 (s, 4H), 2.65 (s, 6H), 2.63 (s, 6H), 2.06 (s, 12H), 1.93 (s, 12H), 1.61 (s, 18H).

**<sup>13</sup>C{<sup>1</sup>H} NMR (151 MHz, CD<sub>2</sub>Cl<sub>2</sub>/CS<sub>2</sub>, rt):**  $\delta$  [ppm]: 162.99, 156.69, 149.70, 147.89, 147.75, 147.43, 146.29, 145.26, 145.00, 144.16, 144.08, 142.19, 141.86, 139.07, 138.93, 138.40, 138.21, 136.10, 134.26, 134.20, 133.25, 132.80, 132.42, 131.89, 131.79, 131.09, 130.31, 129.62, 128.52, 128.45, 128.37, 128.04, 127.78, 127.65, 127.46, 126.56, 124.99, 124.81, 123.98, 123.74, 122.62, 122.26, 122.05, 121.64, 118.78, 113.56, 32.06, 30.45, 21.87, 21.74.

**UV/Vis (CH<sub>2</sub>Cl<sub>2</sub>):**  $\lambda$  [nm] ( $\epsilon$  [M<sup>-1</sup>cm<sup>-1</sup>]) = 339 (49000), 402 (76000), 418 (76000), 475 (110000), 500 (109000), 586 (55000), 650 (15000).

**HRMS (MALDI, DCTB)** for  $C_{142}H_{102}N_{10}Ni_2O_4$  ( $M^+$ ), calcd.: 2126.6787, found: 2126.6781.

**TLC: R<sub>f</sub> [%]:** 0.60 (hexanes/CH<sub>2</sub>Cl<sub>2</sub> 1:3).

### **Bis-(Pyrene-Fused-Porphyrin)-Perylenediimide Pyr-PDI-Pyr**

Pyrene-fused boronic-ester porphyrin **PyrBpin** (10 mg, 10  $\mu$ mol, 2.1 equiv), 5,6,12,13-tetrakis(4-(*tert*-butyl)phenoxy)-2,9-bis(4-iodophenyl)anthra[2,1,9-def:6,5,10-d'e'f']diisoquinoline-1,3,8,10(2H,9H)-tetraone **I-PDI-I** (6.7 mg, 4.8  $\mu$ mol, 1 equiv), Cs<sub>2</sub>CO<sub>3</sub> (4.7 mg, 14  $\mu$ mol, 3 equiv), and Pd(PPh<sub>3</sub>)<sub>4</sub> (1.1 mg, 1.0  $\mu$ mol, 0.2 equiv) were dissolved in toluene (2 mL) and DMF (1 mL) and the **General Procedure for Synthesis of the D-A-D Triads** was followed. **Pyr-PDI-Pyr** was obtained in 23% yield (3.0 mg, 1.1  $\mu$ mol).

**<sup>1</sup>H NMR (601 MHz, CD<sub>2</sub>Cl<sub>2</sub>, rt):  $\delta$  [ppm]:** 9.23 (d,  $J$  = 4.7 Hz, 2H), 8.56 (s, 2H), 8.48 (d,  $J$  = 4.8 Hz, 2H), 8.37 (d,  $J$  = 4.7 Hz, 2H), 8.31 (d,  $J$  = 4.7 Hz, 2H), 8.28 - 8.25 (m, 4H), 8.13 - 8.16 (m, 4H), 8.05 - 7.96 (m, 10H), 7.88 - 7.86 (m, 4H), 7.53 - 7.52 (m, 4H), 7.35 - 7.33 (m, 12H), 7.24 (s, 4H), 7.21 (s, 4H), 6.97 - 6.90 (m, 8H), 2.66 - 2.58 (m, 12H), 2.06 (s, 12H), 1.91 (s, 12H), 1.62 (s, 9H), 1.40 (s, 9H), 1.31 (s, 36H).

**<sup>13</sup>C{<sup>1</sup>H} NMR (101 MHz, CDCl<sub>3</sub>, rt):  $\delta$  [ppm]:** 162.95, 156.65, 156.45, 153.44, 149.42, 147.88, 147.78, 147.60, 147.37, 146.14, 145.18, 144.83, 144.26, 144.13, 142.11, 141.24, 139.05, 138.88, 138.28, 138.05, 138.02, 137.67, 137.51, 136.17, 134.11, 133.89, 133.75, 133.40, 133.26, 132.92, 132.44, 131.97, 131.47, 131.04, 130.88, 130.26, 129.82, 129.67, 129.60, 128.77, 128.58, 128.55, 128.51, 128.36, 128.04, 127.92, 127.38, 127.21, 126.59, 125.09, 124.90, 123.94, 123.71, 123.44, 122.49, 122.18, 122.11, 121.89, 121.19, 120.64, 120.30, 119.86, 118.64, 113.54, 32.81, 32.21, 31.92, 30.61, 30.57, 30.29, 23.76, 22.17, 22.13, 22.02, 21.90.

**UV/Vis (CH<sub>2</sub>Cl<sub>2</sub>):  $\lambda$  [nm] ( $\epsilon$  [M<sup>-1</sup>cm<sup>-1</sup>]):** 341 (63000), 400 (78000), 475 (109000), 502 (114000), 579 (30000).

**HRMS (MALDI, DCTB)** for  $C_{192}H_{154}N_{10}Ni_2O_8$  ( $M^+$ ), calcd.: 2843.0652, found:2843.0636.

**TLC: R<sub>f</sub> [%]:** 0.35 (hexanes/CH<sub>2</sub>Cl<sub>2</sub> 1:1).

### **Bis-(HBC-Fused-Porphyrin)-Naphthalenediimide HBC-NDI-HBC**

HBC-fused boronic-ester porphyrin **HBCBpin** (12 mg, 7.9  $\mu\text{mol}$ , 2.1 equiv), 2,7-bis(4-iodophenyl)benzo[*lmn*][3,8]phenanthroline-1,3,6,8(2H,7H)-tetraone **I-NDI-I** (2.5 mg, 3.7  $\mu\text{mol}$ , 1 equiv),  $\text{Cs}_2\text{CO}_3$  (3.7 mg, 11  $\mu\text{mol}$ , 3 equiv), and  $\text{Pd}(\text{PPh}_3)_4$  (0.9 mg, 0.8  $\mu\text{mol}$ , 0.2 equiv) were dissolved in toluene (2 mL) and DMF (1 mL) and the **General Procedure for Synthesis of the D-A-D Triads** was followed. **HBC-NDI-HBC** was obtained in 21% yield (2.5 mg, 0.8  $\mu\text{mol}$ ).

**$^1\text{H}$  NMR (601 MHz,  $\text{CD}_2\text{Cl}_2/\text{CS}_2$ , rt):  $\delta$  [ppm]:** 9.75 - 9.71 (m, 4H), 9.53 (d,  $J = 5.0$  Hz, 2H), 9.38 (s, 2H), 9.32 - 9.24 (m, 10H), 9.22 (s, 2H), 9.19 (s, 2H), 8.74 (s, 2H), 8.67 (d,  $J = 4.6$  Hz, 2H), 8.42 (d,  $J = 4.6$  Hz, 2H), 8.39 (s, 2H), 8.36 (d,  $J = 4.5$  Hz, 2H), 8.25 - 8.24 (m, 4H), 8.03 (d,  $J = 7.5$  Hz, 4H), 7.49 (d,  $J = 7.5$  Hz, 4H), 7.33 (s, 4H), 7.28 (s, 4H), 7.25 (s, 4H), 2.73 - 2.66 (m, 12H), 2.06 (s, 12H), 2.01 - 1.99 (m, 30H), 1.92 (s, 18H), 1.89 (m, 36H), 1.65 (s, 18H).

**$^{13}\text{C}\{^1\text{H}\}$  NMR (151 MHz,  $\text{CD}_2\text{Cl}_2/\text{CS}_2$ , rt):  $\delta$  [ppm]:** 162.25, 156.53, 149.76, 149.36, 149.24, 149.18, 148.70, 146.75, 146.16, 145.18, 144.74, 144.38, 144.30, 141.87, 141.60, 139.14, 138.76, 138.23, 138.22, 138.19, 138.14, 137.59, 136.10, 134.42, 133.91, 133.85, 131.73, 131.43, 131.39, 131.27, 131.15, 131.07, 130.97, 130.88, 130.76, 130.40, 130.37, 129.83, 128.92, 128.90, 128.79, 128.63, 127.82, 127.49, 127.32, 125.41, 124.51, 124.45, 124.39, 124.22, 124.05, 123.25, 123.23, 122.79, 121.72, 121.59, 121.50, 121.40, 121.36, 121.26, 121.20, 120.86, 119.76, 119.71, 119.63, 119.61, 119.48, 119.45, 118.95, 113.42, 53.98, 32.69, 32.59, 32.52, 32.47, 30.65, 28.09, 22.16, 22.04.

**UV/Vis ( $\text{CH}_2\text{Cl}_2$ ):  $\lambda$  [nm] ( $\epsilon$  [ $\text{M}^{-1}\text{cm}^{-1}$ ]):** 380 (139000), 439 (100000), 511 (138000), 594 (28000), 638 (17000).

**HRMS (MALDI, DCTB)** for  $\text{C}_{226}\text{H}_{182}\text{N}_{10}\text{Ni}_2\text{O}_8$  ( $\text{M}^+$ ), calcd.: 3215.3047, found: 3215.3004.

**TLC:  $R_f$  [%]:** 0.30 ( $\text{CH}_2\text{Cl}_2$ ).

### **Bis-(HBC-Fused-Porphyrin)-Perylenediimide HBC-PDI-HBC**

HBC-fused boronic-ester porphyrin **HBCBpin** (10 mg, 6.5  $\mu\text{mol}$ , 2.1 equiv), 5,6,12,13-tetrakis(4-(*tert*-butyl)phenoxy)-2,9-bis(4-iodophenyl)anthra[2,1,9-def:6,5,10-d'e'f']diisoquinoline-1,3,8,10(2H,9H)-tetraone **I-PDI-I** (4.3 mg, 3.1  $\mu\text{mol}$ , 1 equiv),  $\text{Cs}_2\text{CO}_3$  (3.1 mg, 9.4  $\mu\text{mol}$ , 3 equiv), and  $\text{Pd}(\text{PPh}_3)_4$  (0.7 mg, 0.6  $\mu\text{mol}$ , 0.2 equiv) were dissolved in toluene (2 mL) and DMF (1 mL) and the **General Procedure for Synthesis of the D-A-D Triads** was followed. **HBC-PDI-HBC** was obtained in 16% yield (2.0 mg, 0.5  $\mu\text{mol}$ ).

**$^1\text{H}$  NMR (601 MHz,  $\text{CD}_2\text{Cl}_2$ , rt):  $\delta$  [ppm]:** 9.77 - 9.73 (m, 4H), 9.54 (d,  $J = 4.9$  Hz, 2H), 9.38 (s, 2H), 9.32 - 9.25 (m, 12H), 9.22 (s, 2H), 9.18 (s, 2H), 8.66 (d,  $J = 4.7$  Hz, 2H), 8.42 (d,  $J = 4.7$  Hz, 2H), 8.39 s 8.35 (m, 4H), 8.28 (s, 2H), 8.21 (d,  $J = 4.7$  Hz, 2H), 8.09 - 8.06 (m, 4H), 7.56 - 7.55 (m, 4H), 7.41 - 7.30 (m, 12H), 7.26 - 7.23 (m, 8H), 6.98 - 6.92 (m, 8H), 2.66 - 2.64 (m, 12H), 2.04 (s, 12H), 1.97 (s, 21H), 1.91 - 1.89 (m, 45H), 1.62 (s, 18H), 1.41 (s, 18H).

**$^{13}\text{C}\{^1\text{H}\}$  NMR (151 MHz,  $\text{CD}_2\text{Cl}_2$ , rt):  $\delta$  [ppm]:** 162.51, 156.08, 156.01, 152.99, 149.33, 148.89, 148.79, 148.72, 148.17, 147.13, 146.23, 145.68, 144.72, 144.22, 143.99, 143.89, 141.35, 140.77, 138.64, 138.25, 137.67, 137.63, 137.10, 135.61, 135.00, 133.88, 133.47, 133.38, 133.27, 132.96, 131.24, 131.11, 130.98, 130.71, 130.70, 130.57, 130.48, 130.46, 130.43, 130.40, 130.29, 130.13, 130.07, 128.37, 128.15, 128.07, 127.47, 126.80, 126.74, 126.70, 124.93, 124.03, 123.96, 123.91, 123.73, 123.51, 122.97, 122.73, 122.28, 121.39, 121.23, 121.09, 120.95, 120.83, 120.75, 120.39, 120.18, 119.80, 119.39, 119.25, 119.16, 119.11, 118.96, 118.43, 32.15, 32.05, 31.98, 31.95, 31.44, 21.65, 21.59, 21.47.

**UV/Vis ( $\text{CH}_2\text{Cl}_2$ ):  $\lambda$  [nm] ( $\epsilon$  [ $\text{M}^{-1}\text{cm}^{-1}$ ]):** 380 (145000), 439 (121000), 511 (151000), 525 (150000), 589 (92000), 635 (22000).

**HRMS (MALDI, DCTB) for  $\text{C}_{276}\text{H}_{234}\text{N}_{10}\text{Ni}_2\text{O}_8$  ( $\text{M}^+$ ), calcd.:** 3931.6913, found: 3931.6970.

**TLC:  $R_f$  [%]:** 0.80 (hexanes/ $\text{CH}_2\text{Cl}_2$  1:3).



## 3 Spectral Appendix

$^1\text{H}$  NMR (400 MHz,  $\text{CD}_2\text{Cl}_2$ , rt)

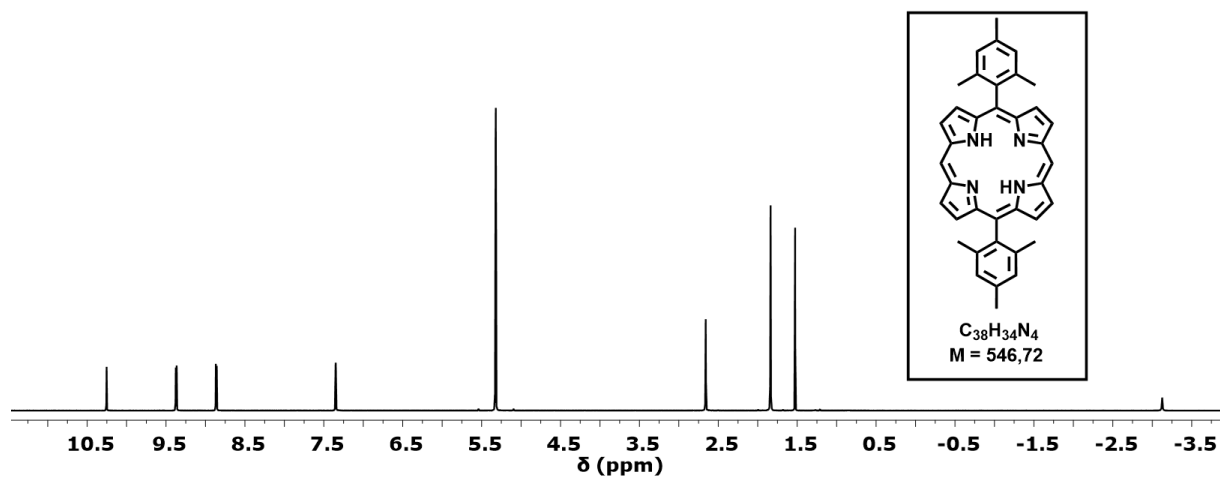

$^{13}\text{C}$  NMR (101 MHz,  $\text{CD}_2\text{Cl}_2$ , rt)

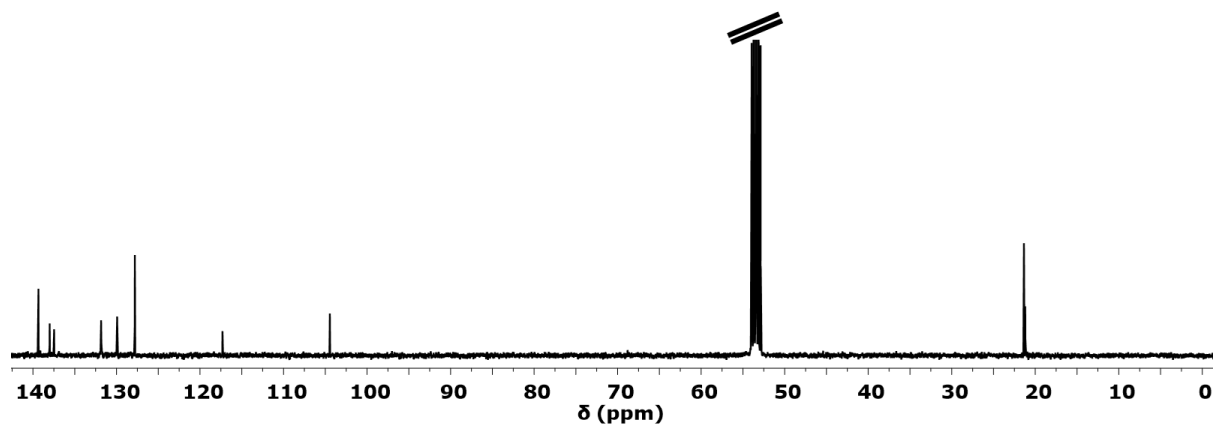

**Figure S1.**  $^1\text{H}$  and  $^{13}\text{C}$  NMR of 17.

## MS (MALDI)

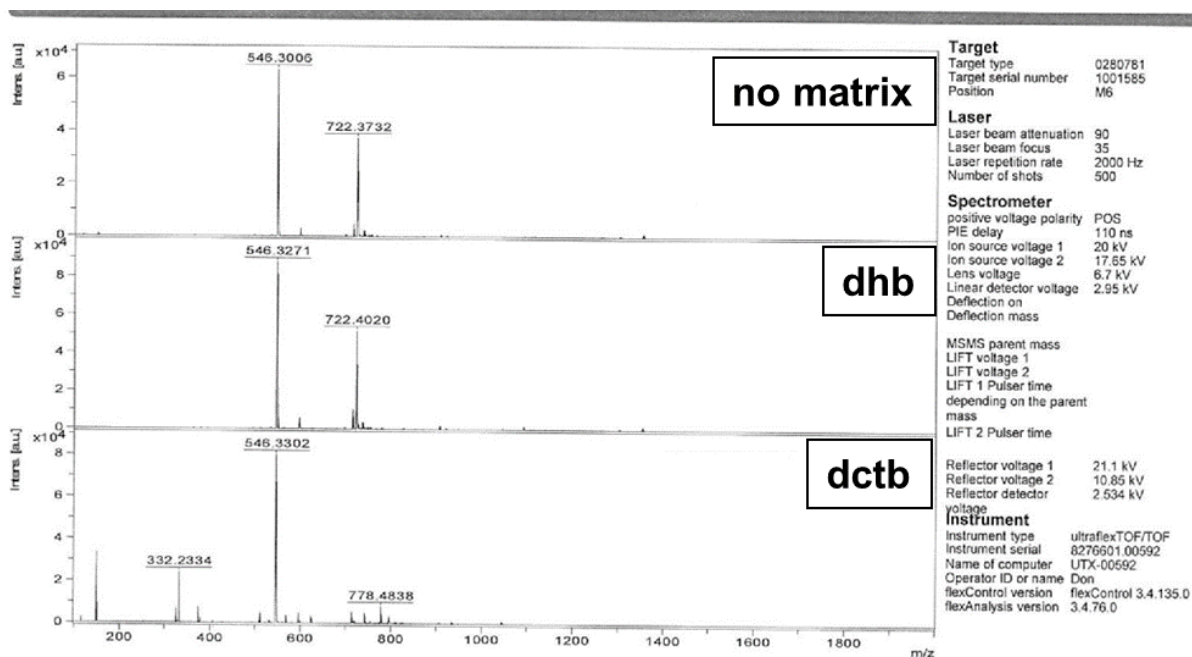

## HRMS (MALDI)

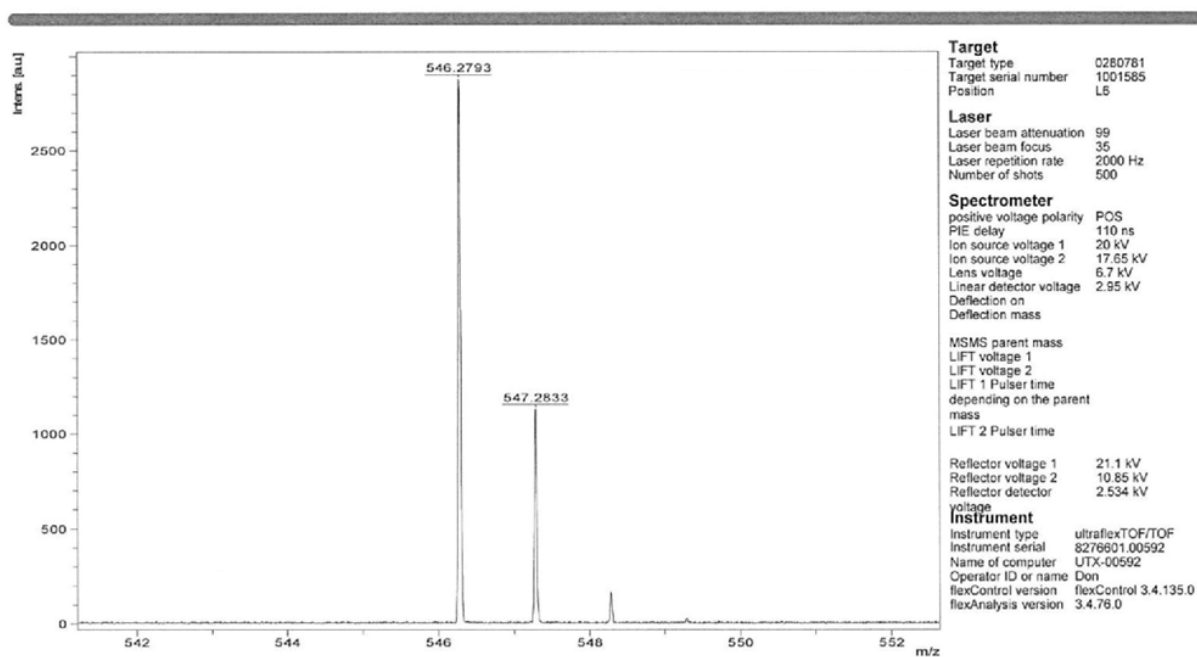

### SmartFormula

| Formula                                           | Mass     | Error  | mSigma  | DbIEq | N rule | Electron Configuration |
|---------------------------------------------------|----------|--------|---------|-------|--------|------------------------|
| C <sub>38</sub> H <sub>34</sub><br>N <sub>4</sub> | 546.2778 | 2.8010 | 48.8215 | 24.00 | ok     | odd                    |

Figure S2. MS/HRMS (MALDI) of 17.

$^1\text{H}$  NMR (400 MHz,  $\text{CD}_2\text{Cl}_2$ , rt)

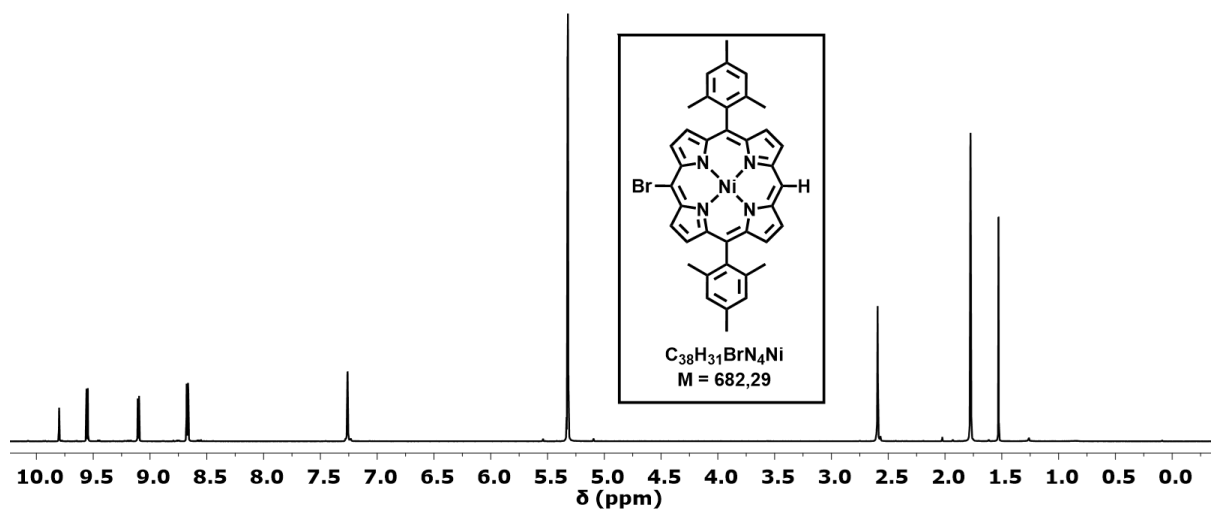

$^{13}\text{C}$  NMR (101 MHz,  $\text{CD}_2\text{Cl}_2$ , rt)

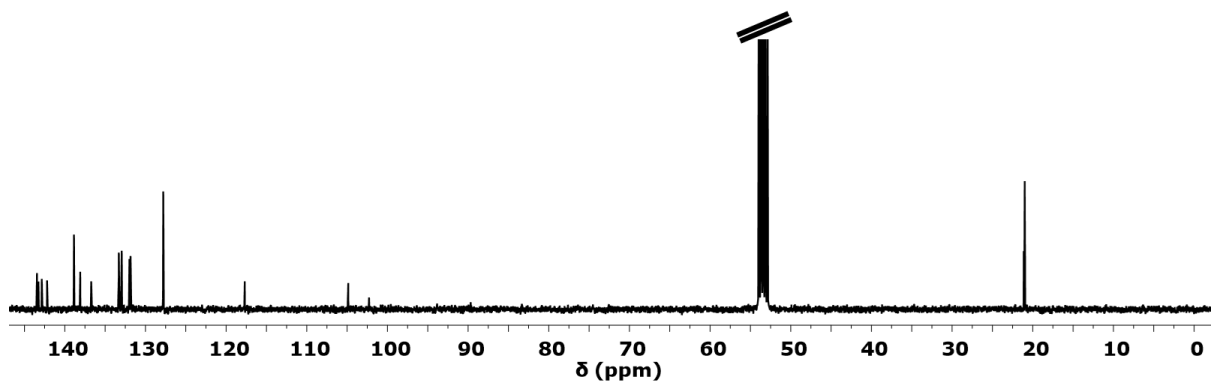

Figure S3.  $^1\text{H}$  and  $^{13}\text{C}$  NMR of 3.

## MS (MALDI)

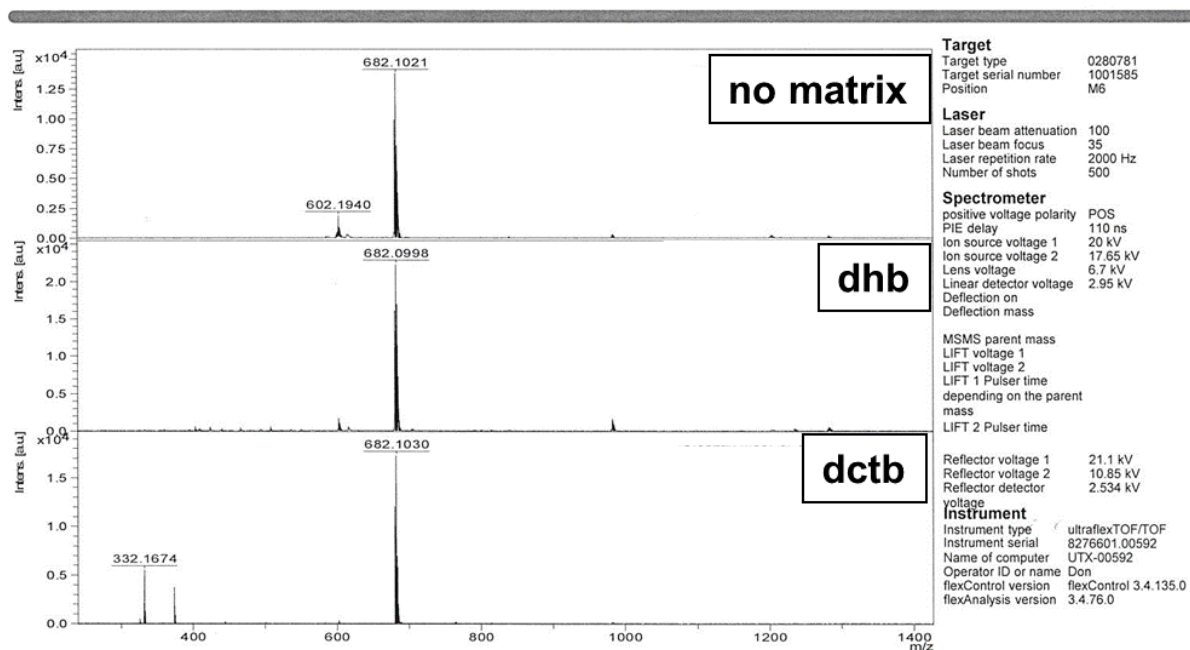

## HRMS (MALDI)

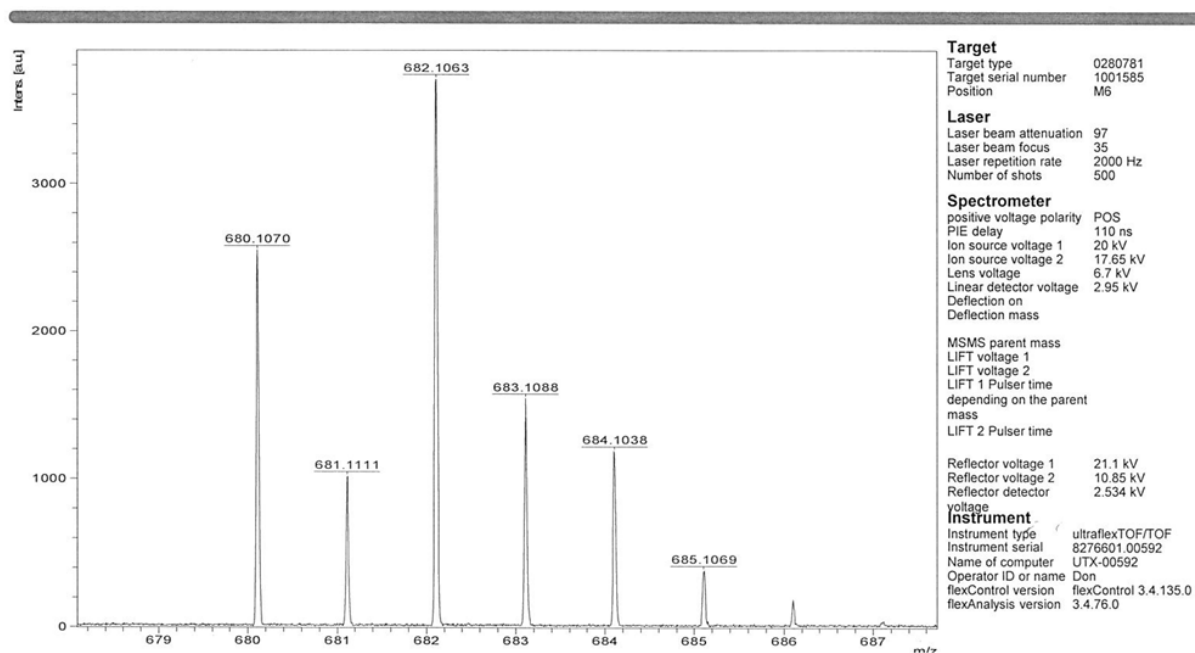

### SmartFormula

| Formula                | Mass     | Error  | mSigma  | DblEq | N rule | Electron Configuration |
|------------------------|----------|--------|---------|-------|--------|------------------------|
| C 38 H 31<br>Br N 4 Ni | 680.1080 | 1.4813 | 36.9206 | 25.00 | ok     | odd                    |

Figure S4. MS/HRMS (MALDI) of 3.

$^1\text{H}$  NMR (400 MHz,  $\text{CDCl}_3$ , rt)

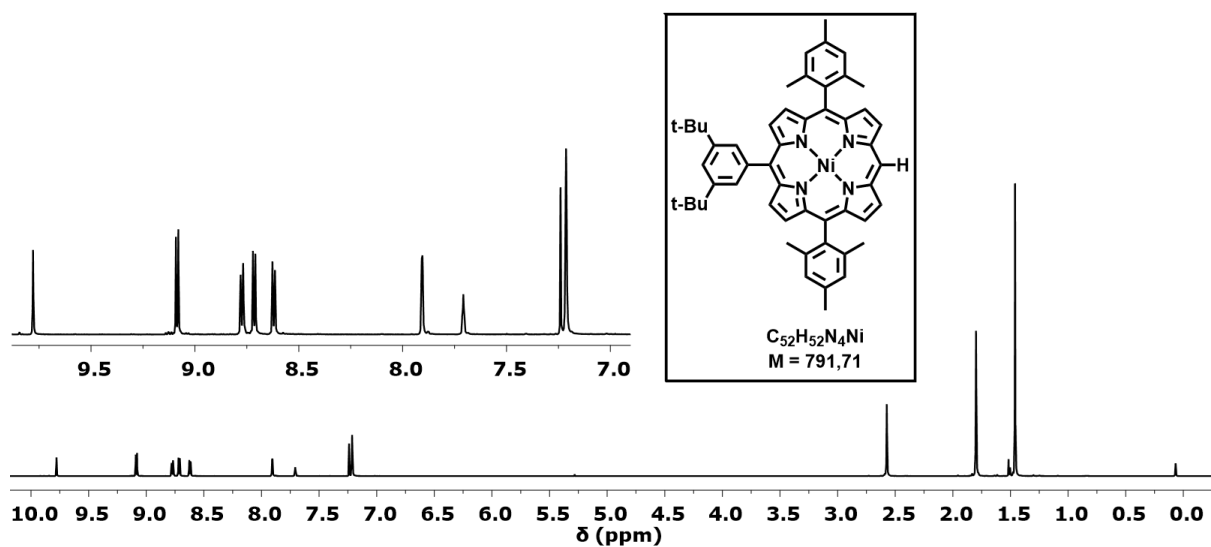

$^{13}\text{C}$  NMR (101 MHz,  $\text{CDCl}_3$ , rt)

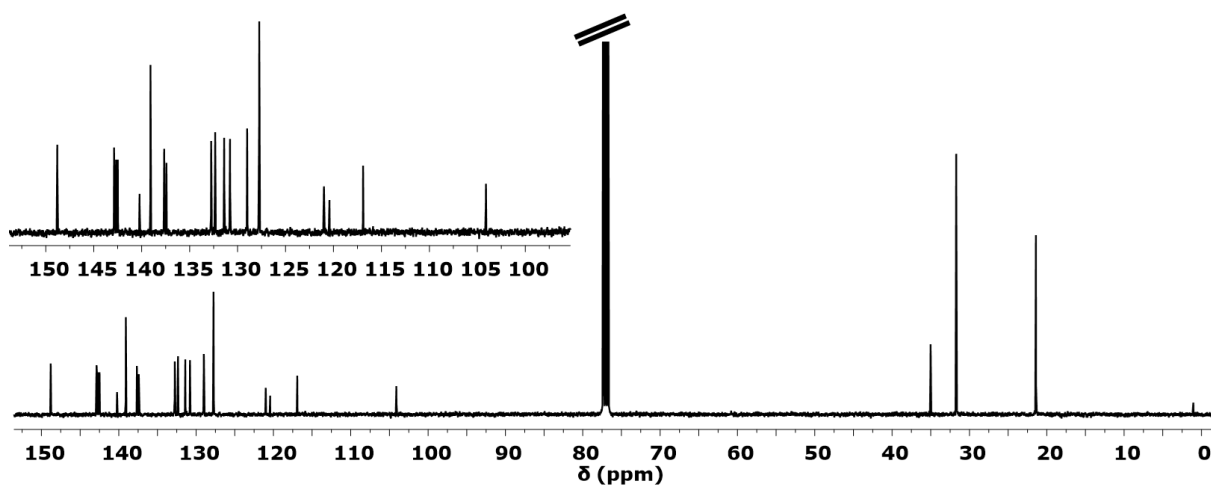

Figure S5.  $^1\text{H}$  and  $^{13}\text{C}$  NMR of 4.

## MS (MALDI)

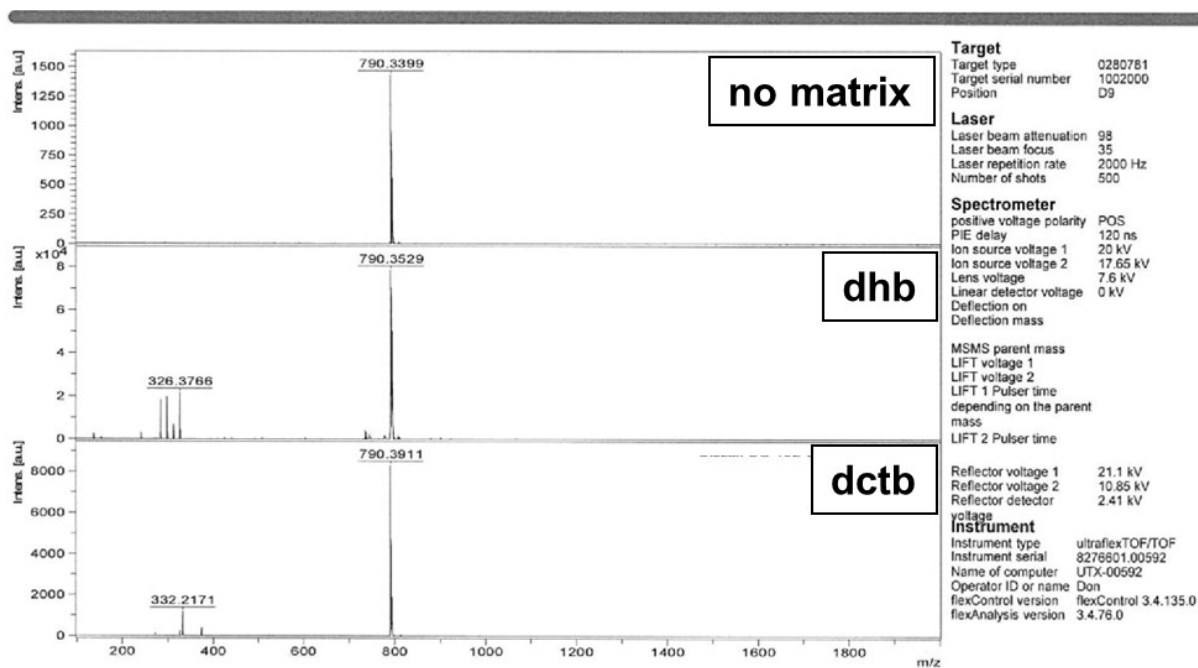

## HRMS (MALDI)

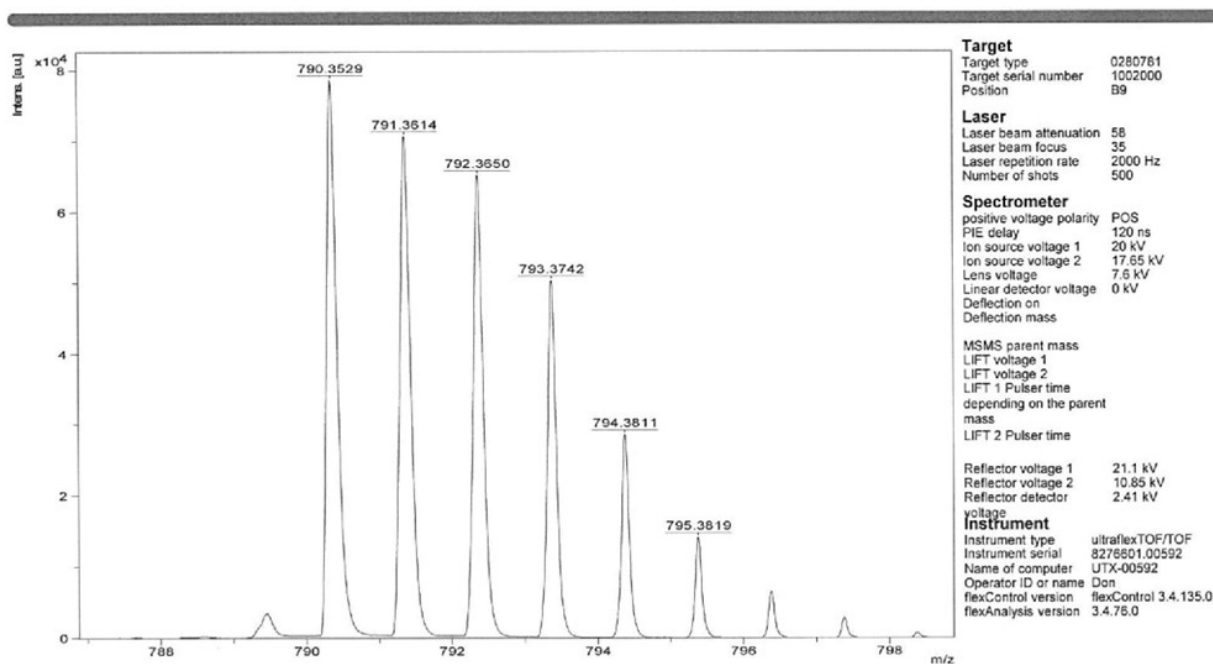

### SmartFormula

| Formula                                              | Mass     | Error  | mSigma   | DblEq | N rule | Electron Configuration |
|------------------------------------------------------|----------|--------|----------|-------|--------|------------------------|
| C <sub>52</sub> H <sub>52</sub><br>N <sub>4</sub> Ni | 790.3540 | 1.3846 | 219.2905 | 29.00 | ok     | odd                    |

Figure S6. MS/HRMS (MALDI) of 4.

$^1\text{H}$  NMR (400 MHz,  $\text{CDCl}_3$ , rt)

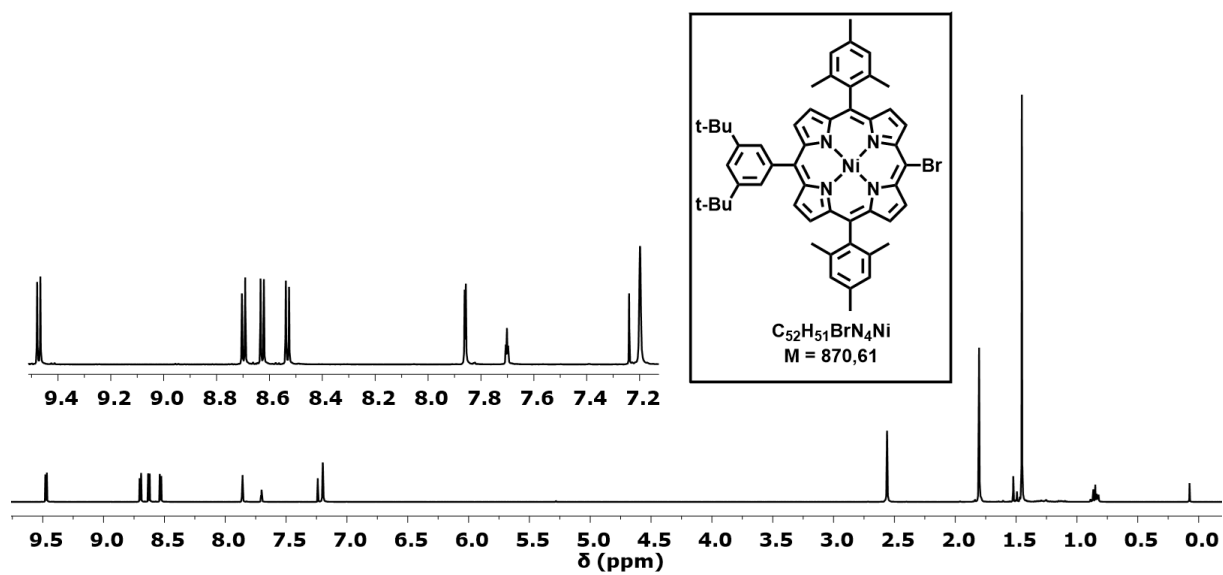

$^{13}\text{C}$  NMR (101 MHz,  $\text{CDCl}_3$ , rt)

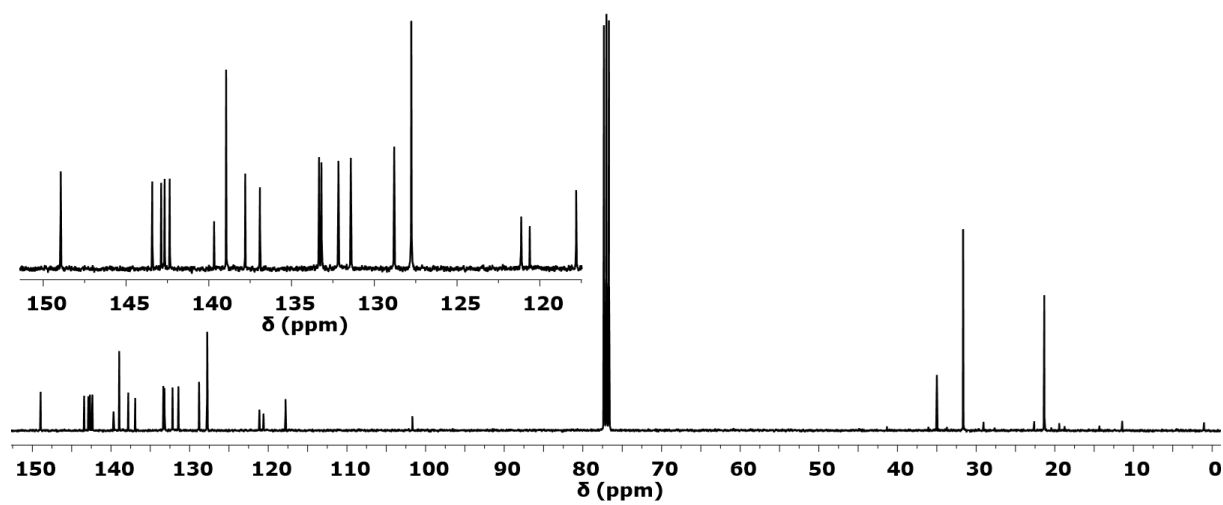

Figure S7.  $^1\text{H}$  and  $^{13}\text{C}$  NMR of 5.

## MS (MALDI)

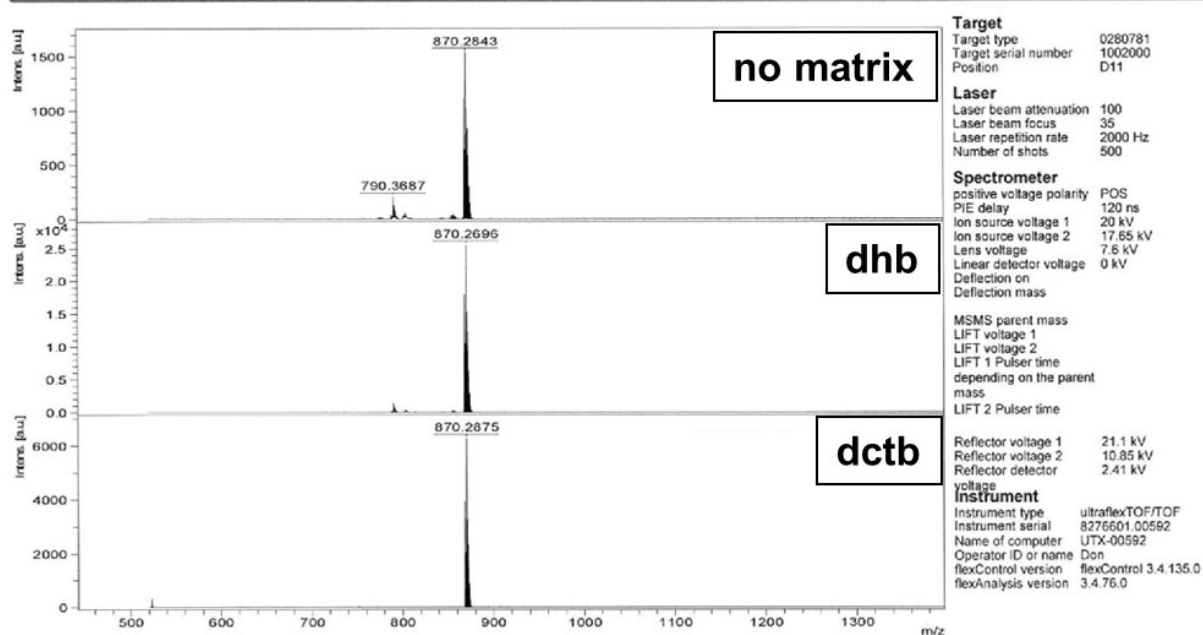

## HRMS (MALDI)

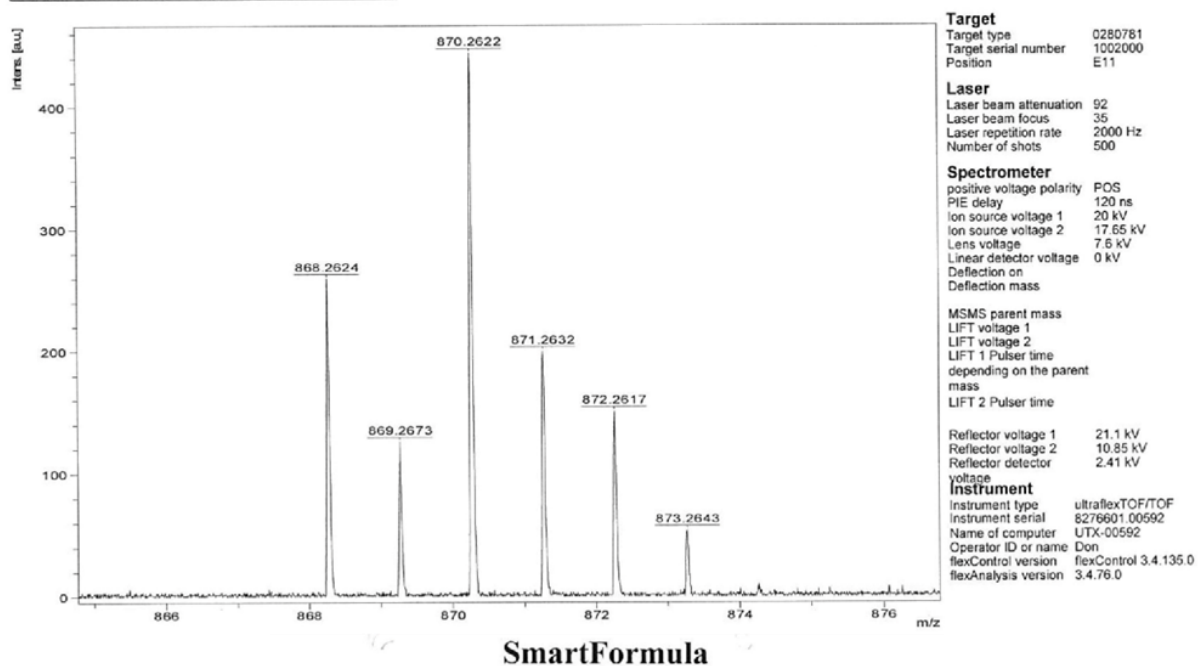

### SmartFormula

| Formula                | Mass     | Error  | mSigma  | DblEq | N rule | Electron Configuration |
|------------------------|----------|--------|---------|-------|--------|------------------------|
| C 52 H 51<br>Br N 4 Ni | 868.2645 | 2.4787 | 72.7265 | 29.00 | ok     | odd                    |

Figure S8. MS/HRMS (MALDI) of **5**.



$^1\text{H}$  NMR (600 MHz,  $\text{CD}_2\text{Cl}_2$ , rt)

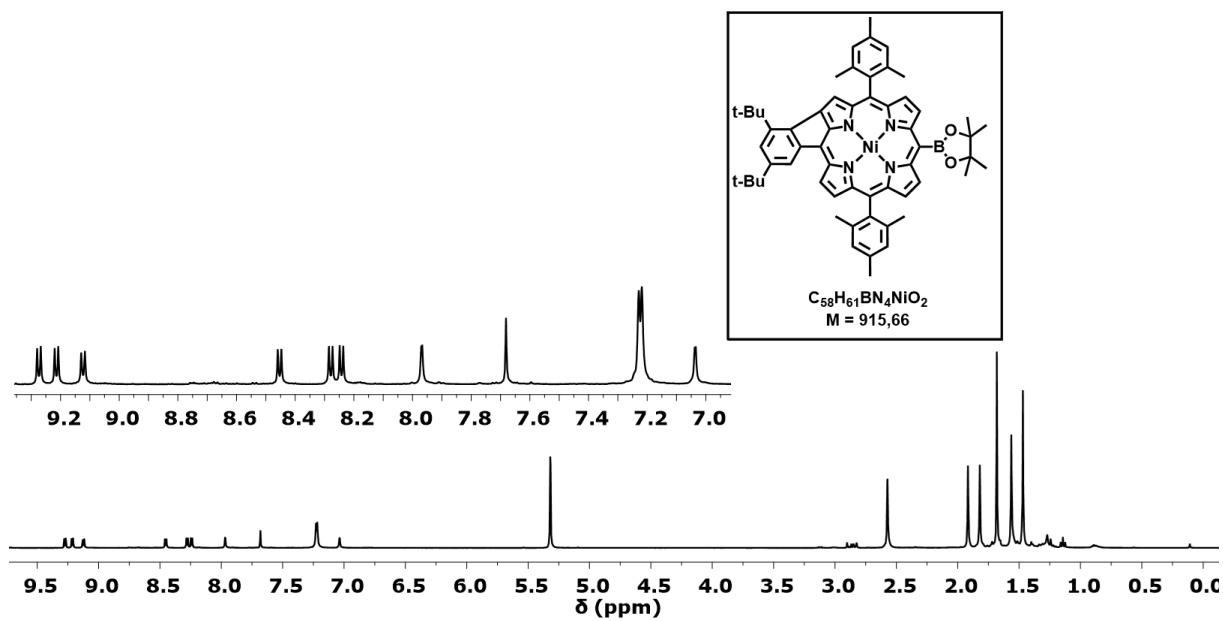

$^{13}\text{C}$  NMR (101 MHz,  $\text{CD}_2\text{Cl}_2$ , rt)

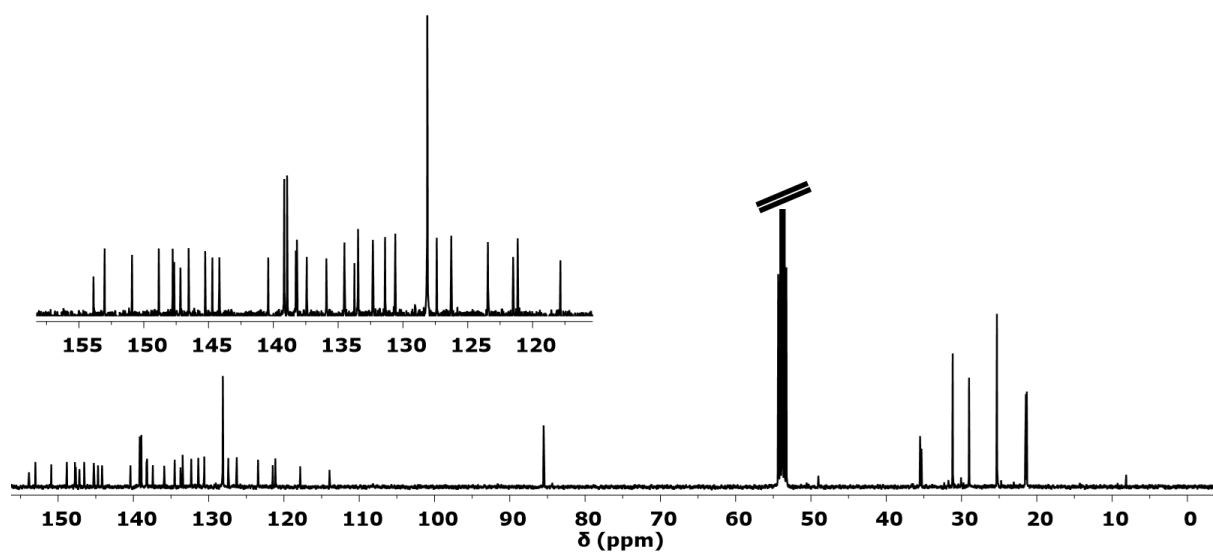

Figure S9.  $^1\text{H}$  and  $^{13}\text{C}$  NMR of PhBpin.

## MS (MALDI)

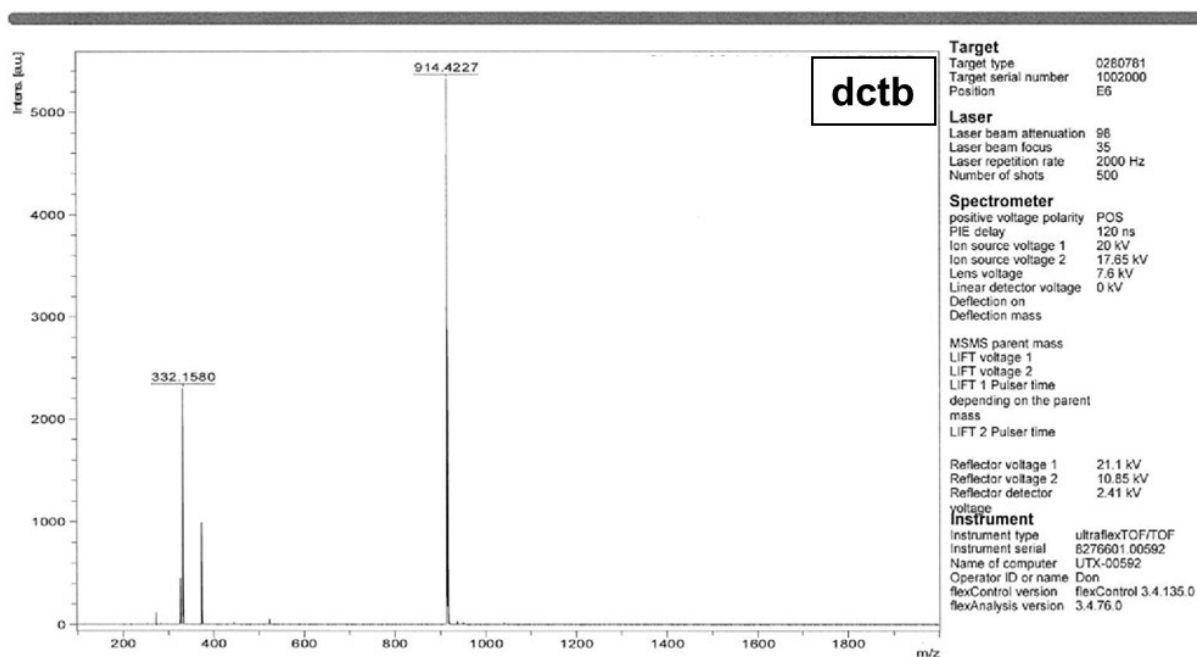

## HRMS (MALDI)

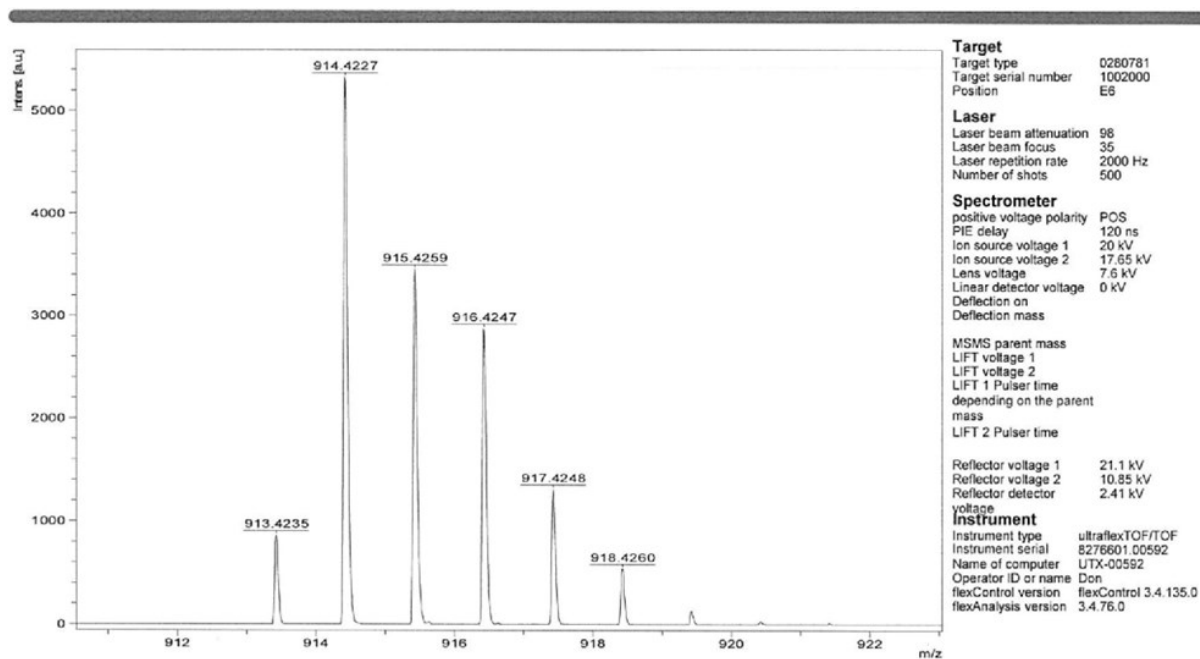

### SmartFormula

| Formula                      | Mass     | Error  | mSigma  | DblEq | N rule | Electron Configuration |
|------------------------------|----------|--------|---------|-------|--------|------------------------|
| C 58 H 61<br>B N 4 Ni<br>O 2 | 914.4236 | 0.9784 | 40.2851 | 31.00 | ok     | odd                    |

Figure S10. MS/HRMS (MALDI) of PhBpin.

$^1\text{H}$  NMR (400 MHz,  $\text{CDCl}_3$ , rt)

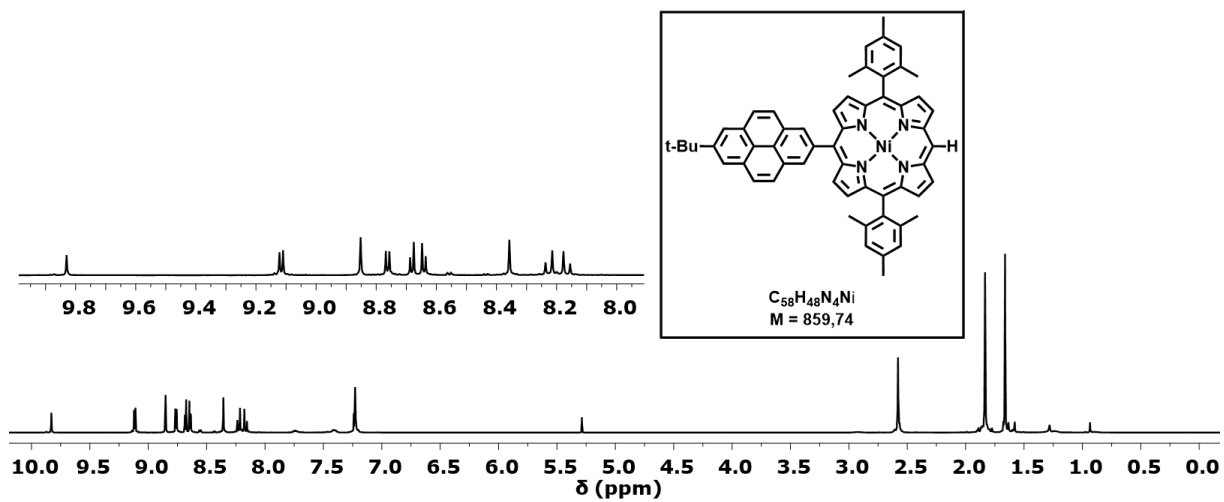

$^{13}\text{C}$  NMR (101 MHz,  $\text{CDCl}_3$ , rt)

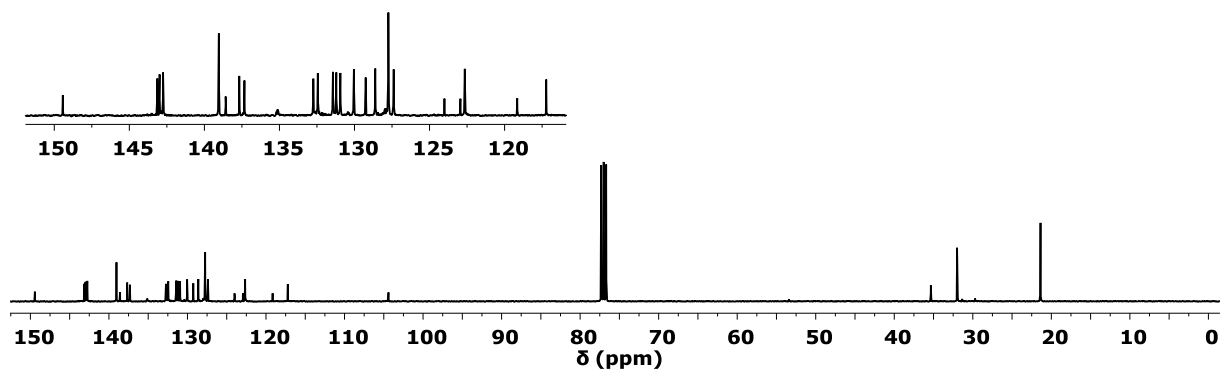

Figure S11.  $^1\text{H}$  and  $^{13}\text{C}$  NMR of **8**.

## MS (MALDI)

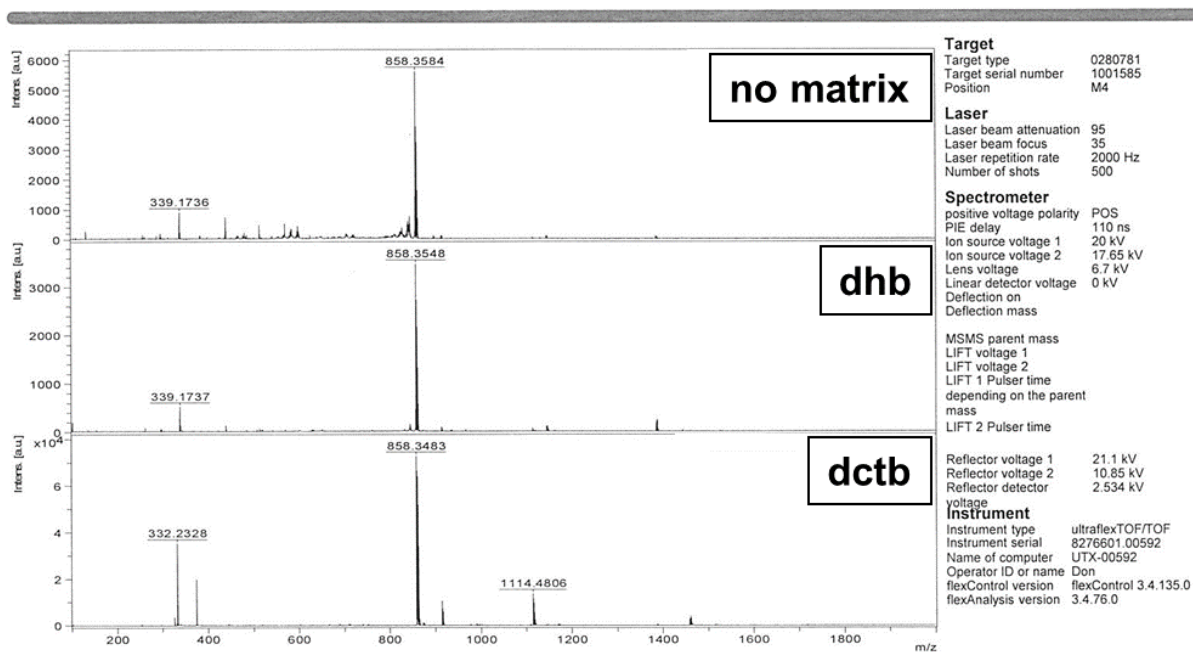

## HRMS (MALDI)

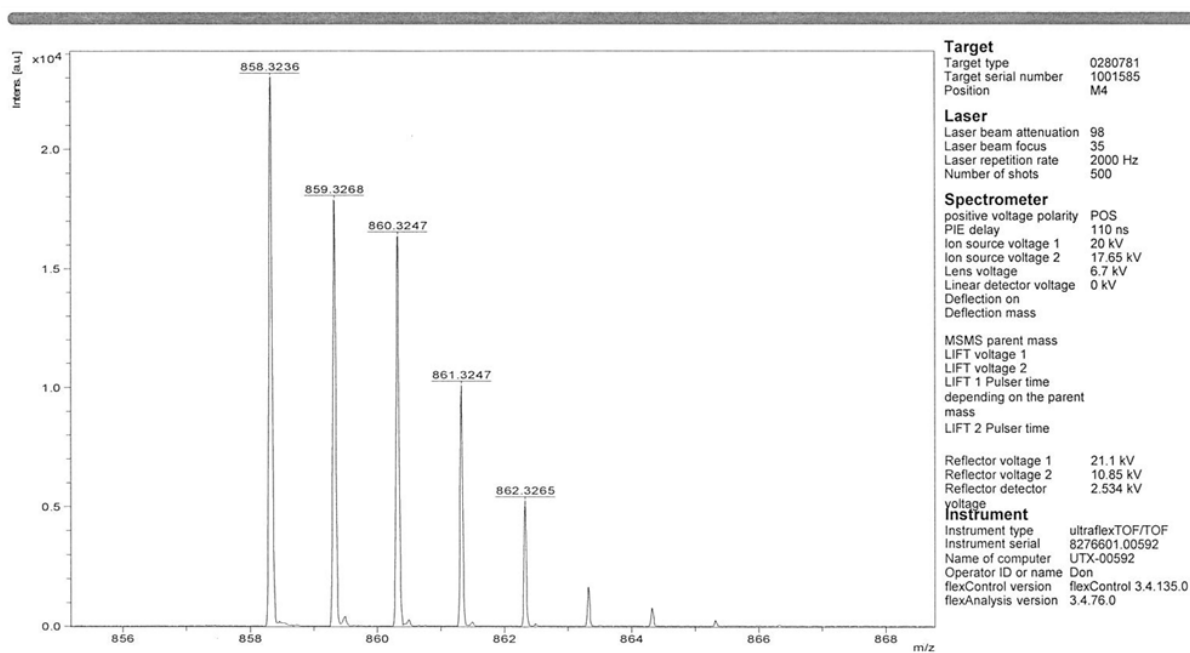

## SmartFormula

| Formula                                              | Mass     | Error  | mSigma  | DbEq  | N rule | Electron Configuration |
|------------------------------------------------------|----------|--------|---------|-------|--------|------------------------|
| C <sub>58</sub> H <sub>48</sub><br>N <sub>4</sub> Ni | 858.3227 | 1.0858 | 85.1614 | 37.00 | ok     | odd                    |

Figure S12. MS/HRMS (MALDI) of **8**.

$^1\text{H}$  NMR (400 MHz,  $\text{CDCl}_3$ , rt)

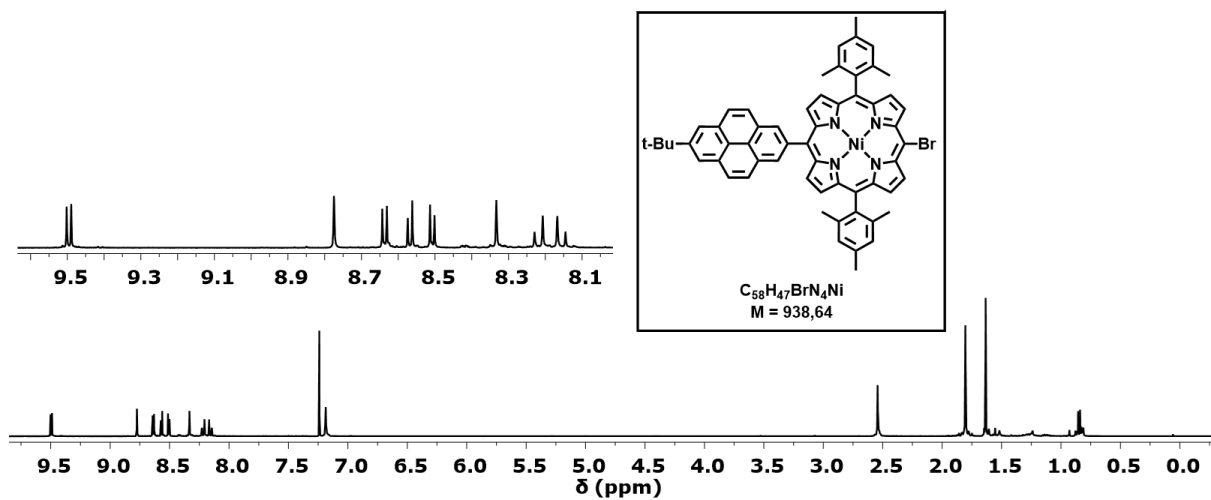

$^{13}\text{C}$  NMR (101 MHz,  $\text{CDCl}_3$ , rt)

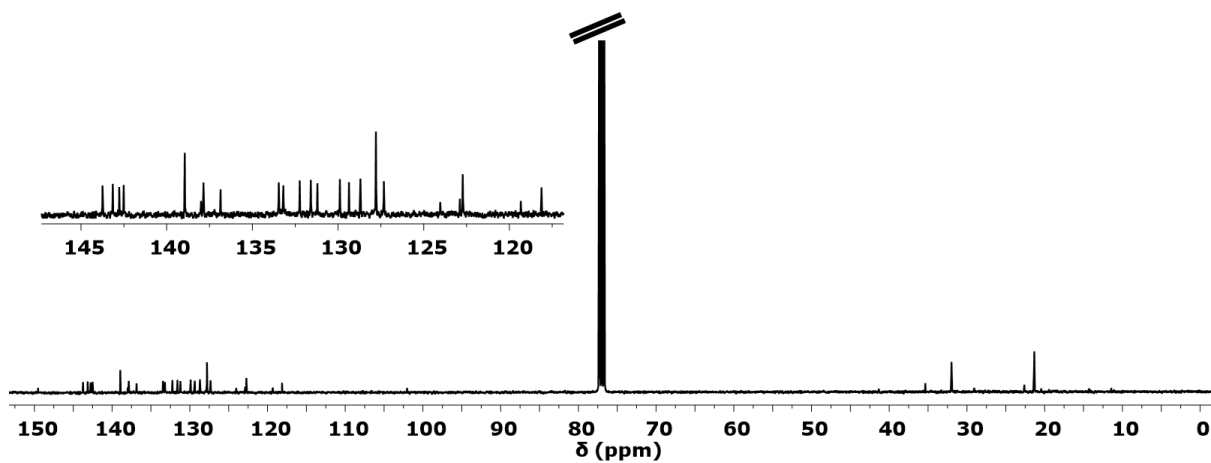

Figure S13.  $^1\text{H}$  and  $^{13}\text{C}$  NMR of **9**.

## MS (MALDI)

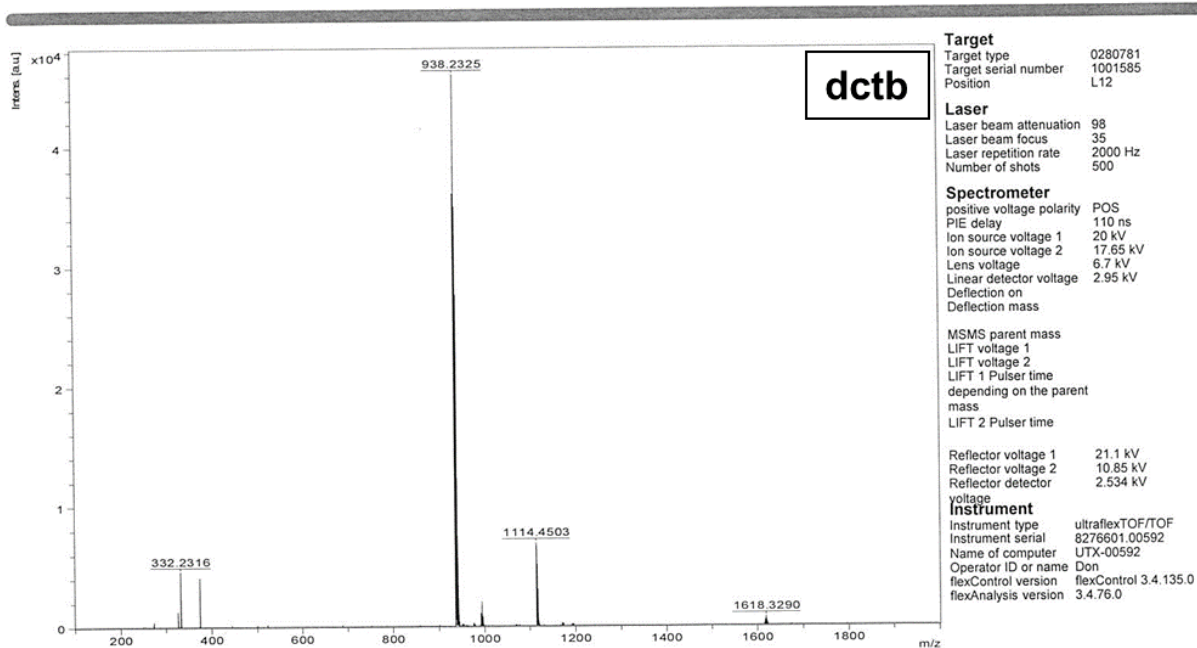

## HRMS (MALDI)

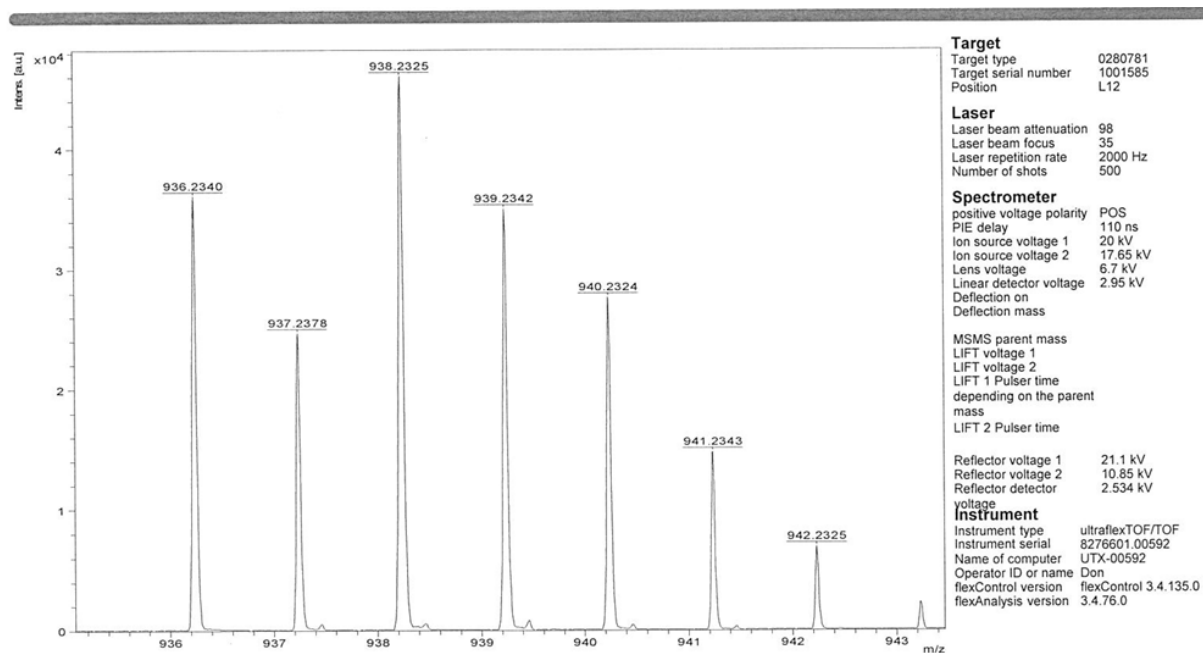

### SmartFormula

| Formula                | Mass     | Error  | mSigma  | DbIEq | N rule | Electron Configuration |
|------------------------|----------|--------|---------|-------|--------|------------------------|
| C 58 H 47<br>Br N 4 Ni | 936.2332 | 0.8195 | 96.1846 | 37.00 | ok     | odd                    |

Figure S14. MS/HRMS (MALDI) of **9**.

$^1\text{H}$  NMR (601 MHz,  $\text{CD}_2\text{Cl}_2$ , rt)

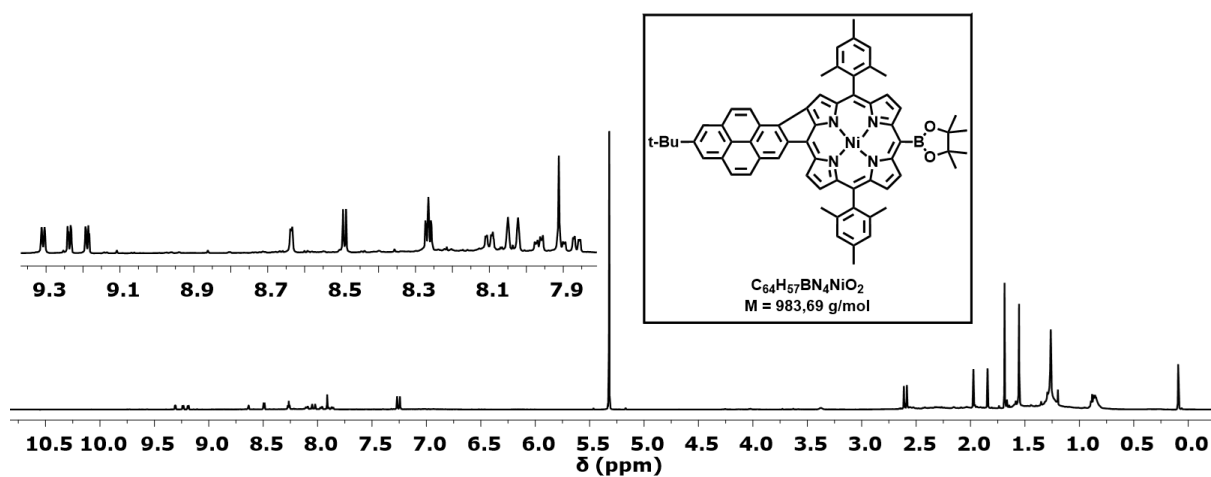

$^{13}\text{C}$  NMR - DEPTQ135 (151 MHz,  $\text{CD}_2\text{Cl}_2$ , rt)

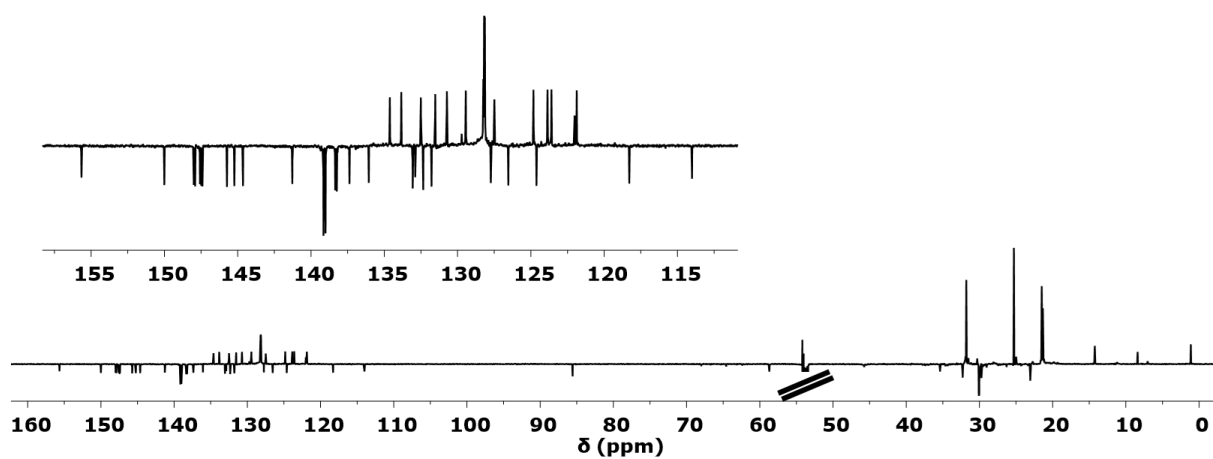

**Figure S15.**  $^1\text{H}$  and  $^{13}\text{C}$  NMR (DEPTQ135) of PyrBpin.

$^1\text{H}$ - $^1\text{H}$  COSY (601 MHz,  $\text{CD}_2\text{Cl}_2$ , rt)

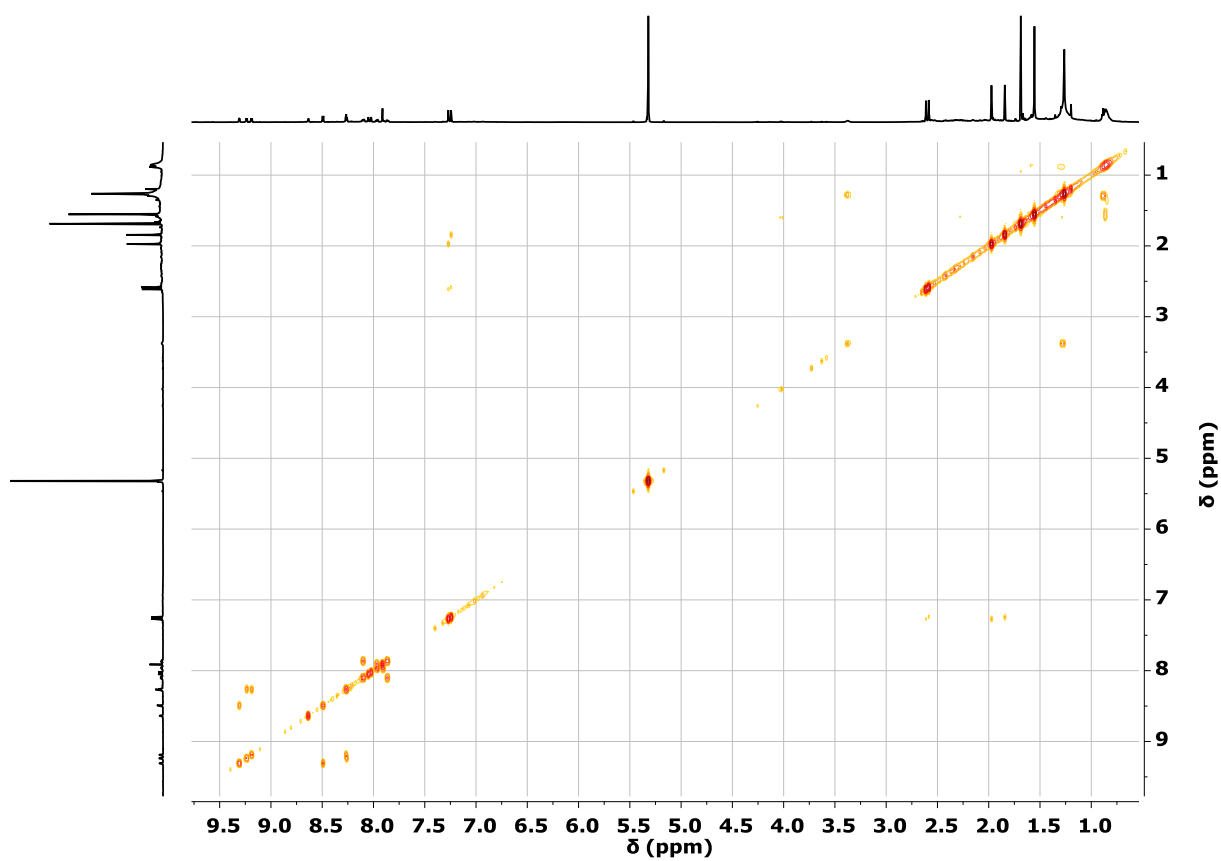

Figure S16.  $^1\text{H}$ - $^1\text{H}$  COSY of PyrBpin.



$^1\text{H}$ - $^{13}\text{C}$  HSQC (601 MHz,  $\text{CD}_2\text{Cl}_2$ , rt)

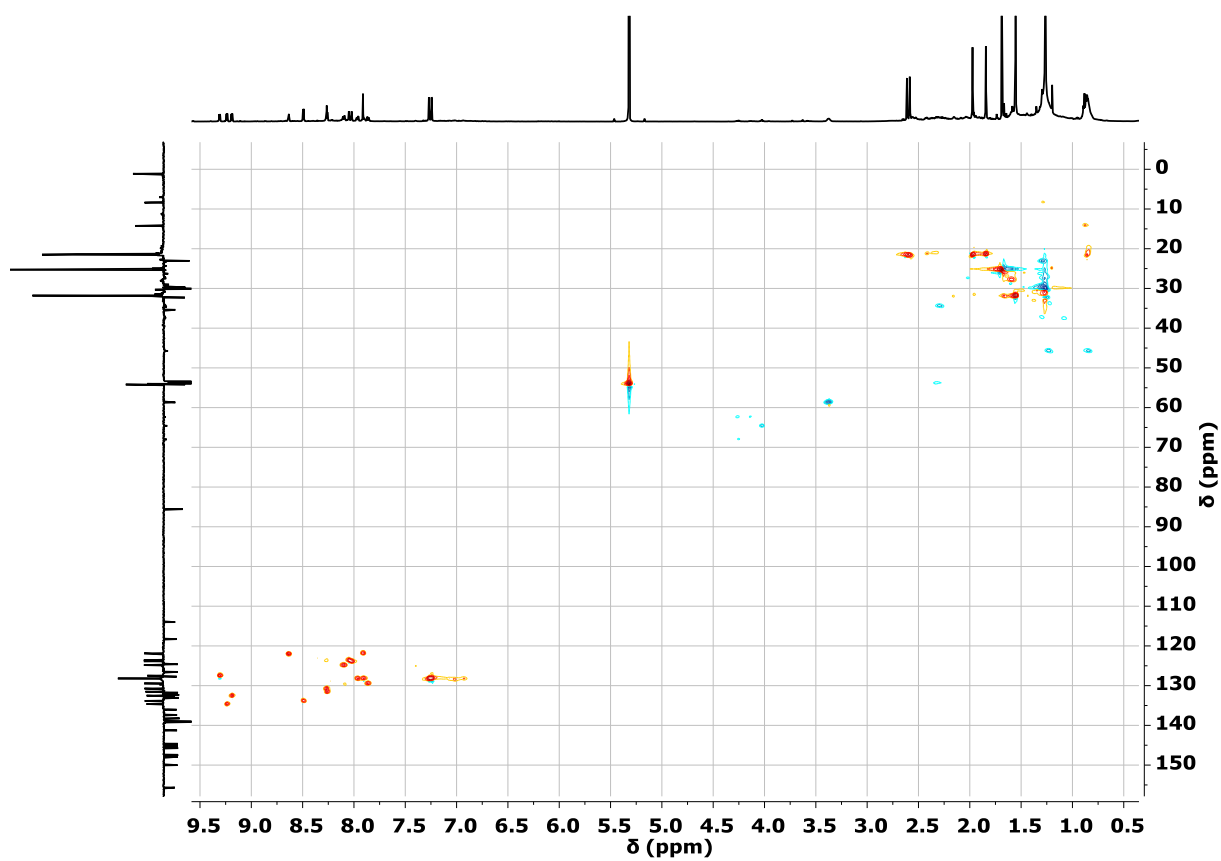

Figure S17.  $^1\text{H}$ - $^{13}\text{C}$  HSQC of PyrBpin.

$^1\text{H}$ - $^{13}\text{C}$  HMBC (601 MHz,  $\text{CD}_2\text{Cl}_2$ , rt)

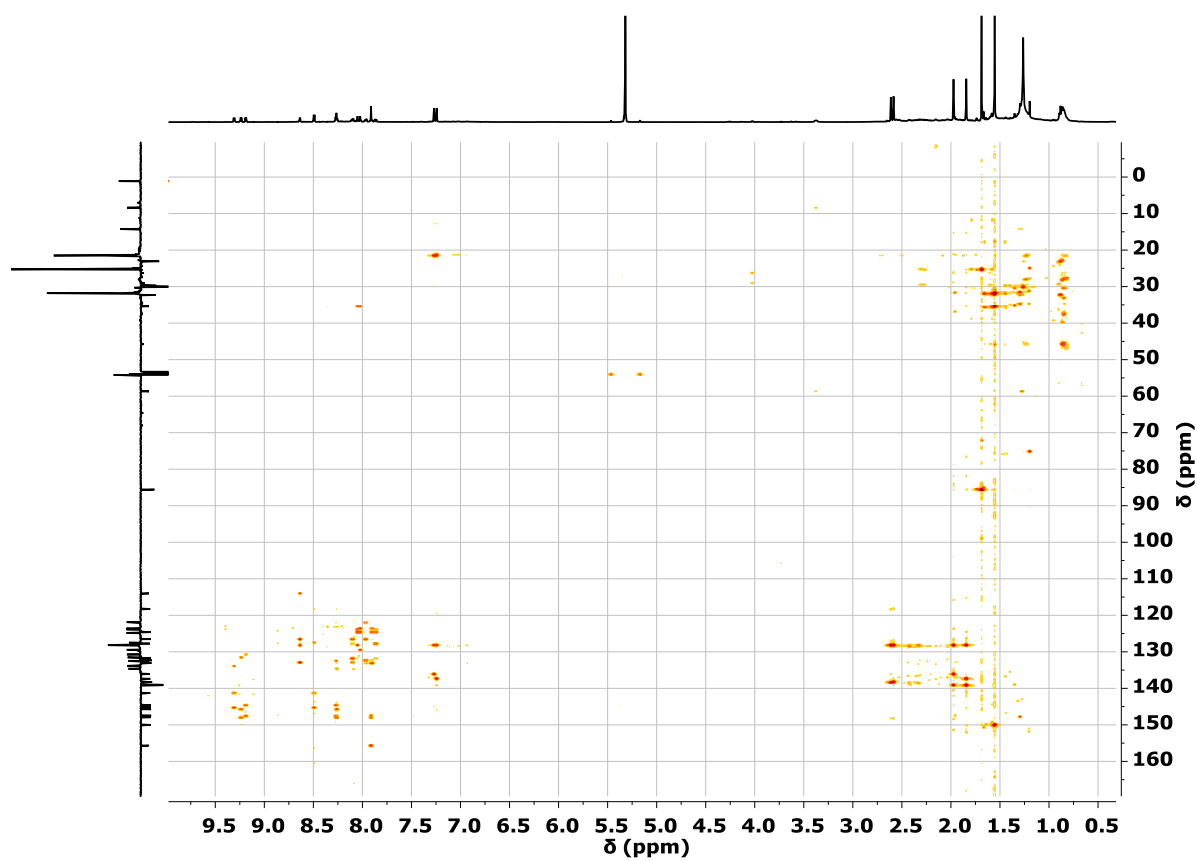

Figure S18.  $^1\text{H}$ - $^{13}\text{C}$  HMBC of PyrBpin.

## MS (MALDI)

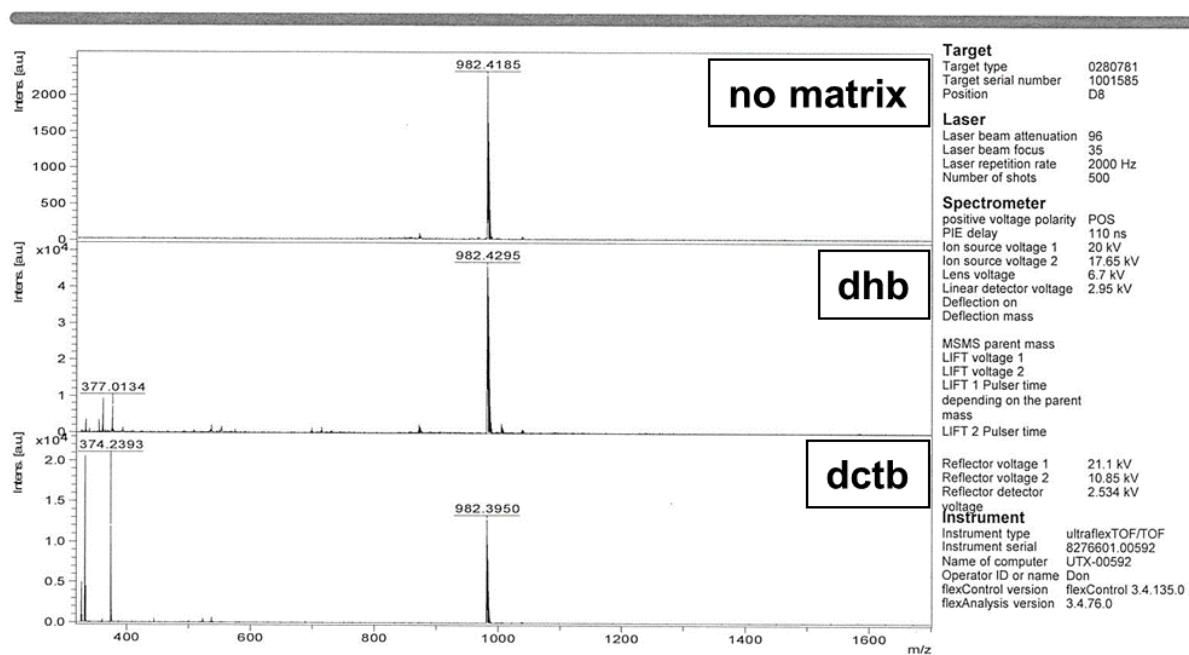

## HRMS (MALDI)

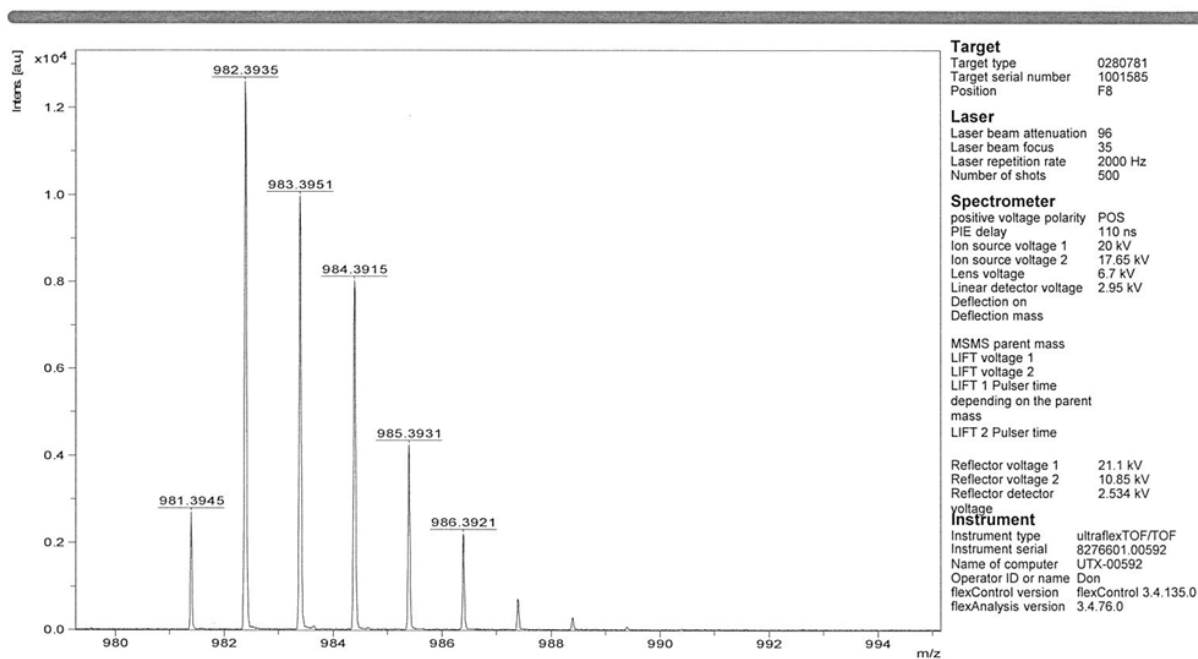

## SmartFormula

| Formula                      | Mass     | Error  | mSigma  | DbIEq | N rule | Electron Configuration |
|------------------------------|----------|--------|---------|-------|--------|------------------------|
| C 64 H 57<br>B N 4 Ni<br>O 2 | 982.3923 | 1.2436 | 28.7257 | 39.00 | ok     | odd                    |

Figure S19. MS/HRMS (MALDI) of PyrBpin.

$^1\text{H}$  NMR (400 MHz,  $\text{CDCl}_3$ , rt)

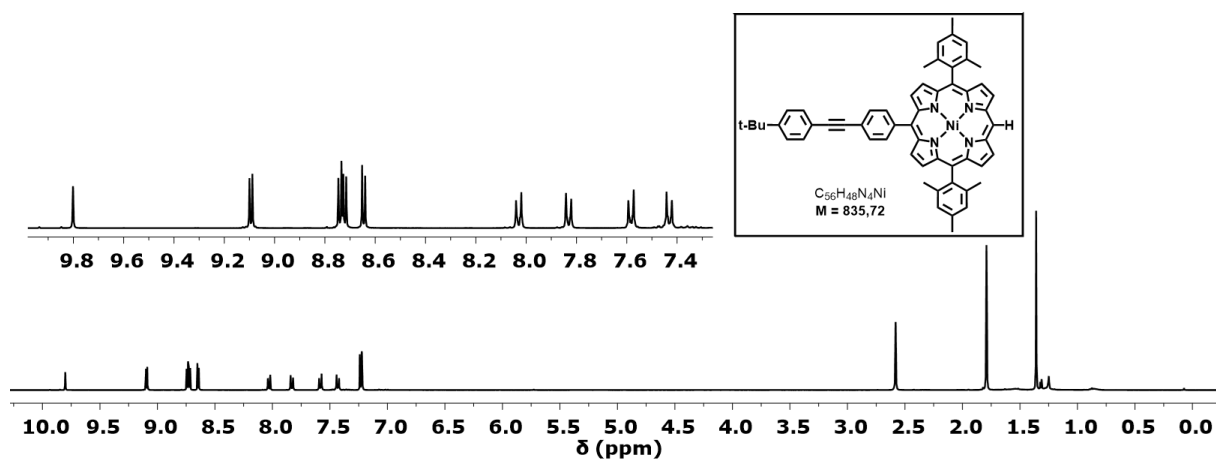

$^{13}\text{C}$  NMR (101 MHz,  $\text{CDCl}_3$ , rt)

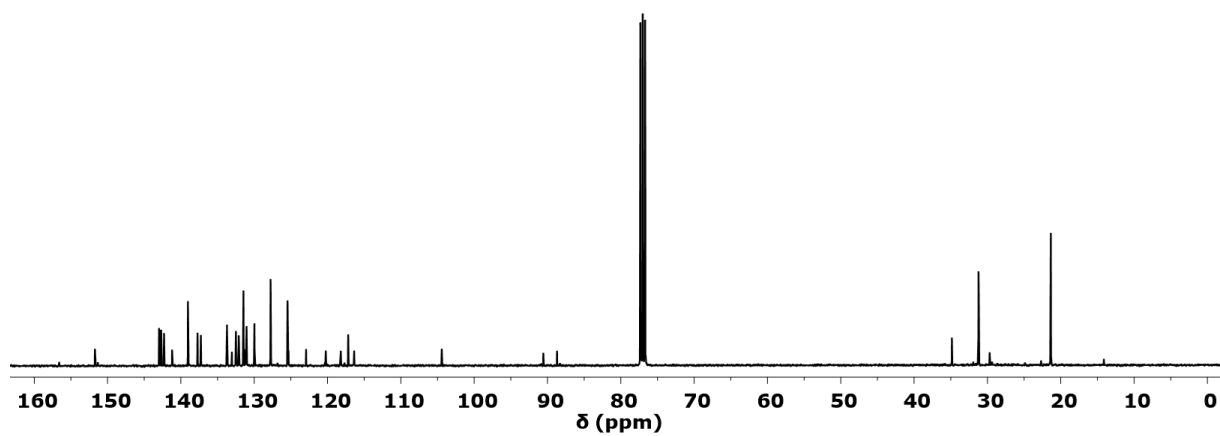

Figure S20.  $^1\text{H}$  and  $^{13}\text{C}$  NMR of 12.

## MS (MALDI)

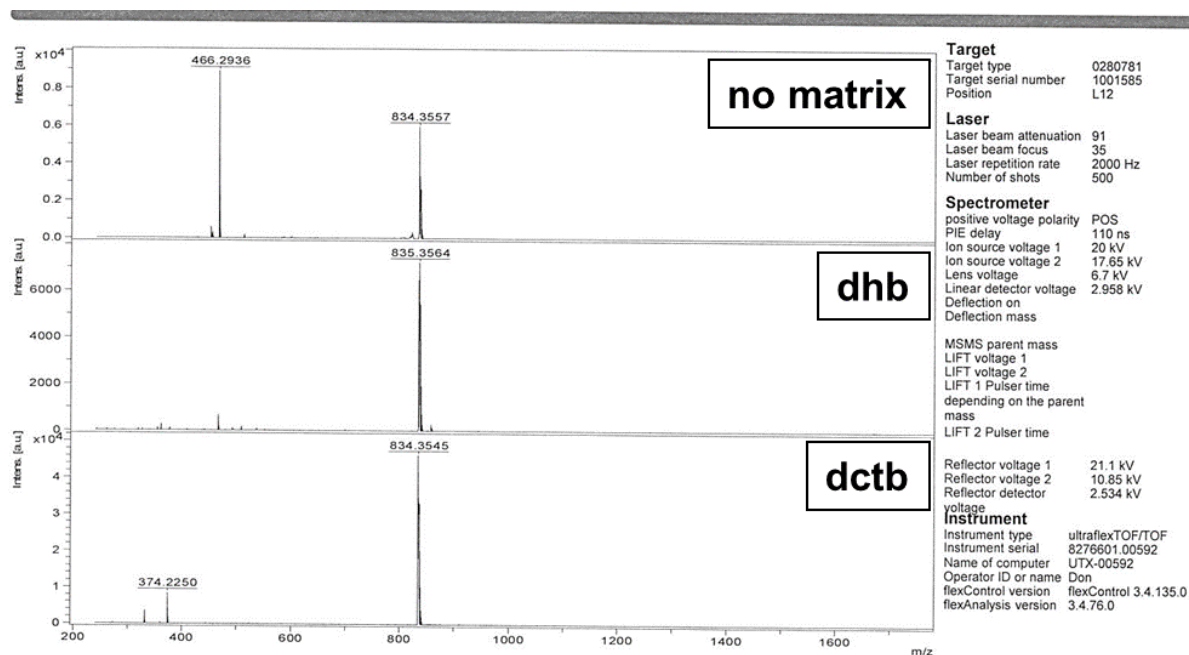

## HRMS (MALDI)

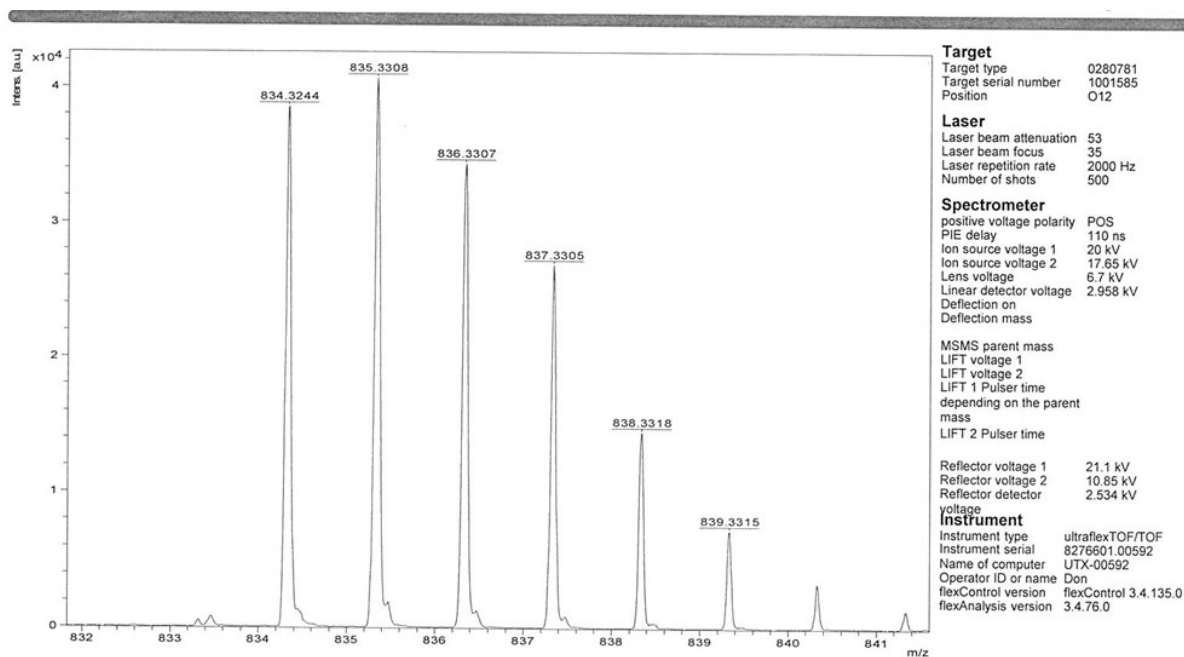

## SmartFormula

| Formula                                              | Mass     | Error  | mSigma   | DbIEq | N rule | Electron Configuration |
|------------------------------------------------------|----------|--------|----------|-------|--------|------------------------|
| C <sub>56</sub> H <sub>48</sub><br>N <sub>4</sub> Ni | 834.3227 | 2.0783 | 226.0732 | 35.00 | ok     | odd                    |

Figure S21. MS/HRMS (MALDI) of 12.

$^1\text{H}$  NMR (400 MHz,  $\text{CDCl}_3$ , rt)

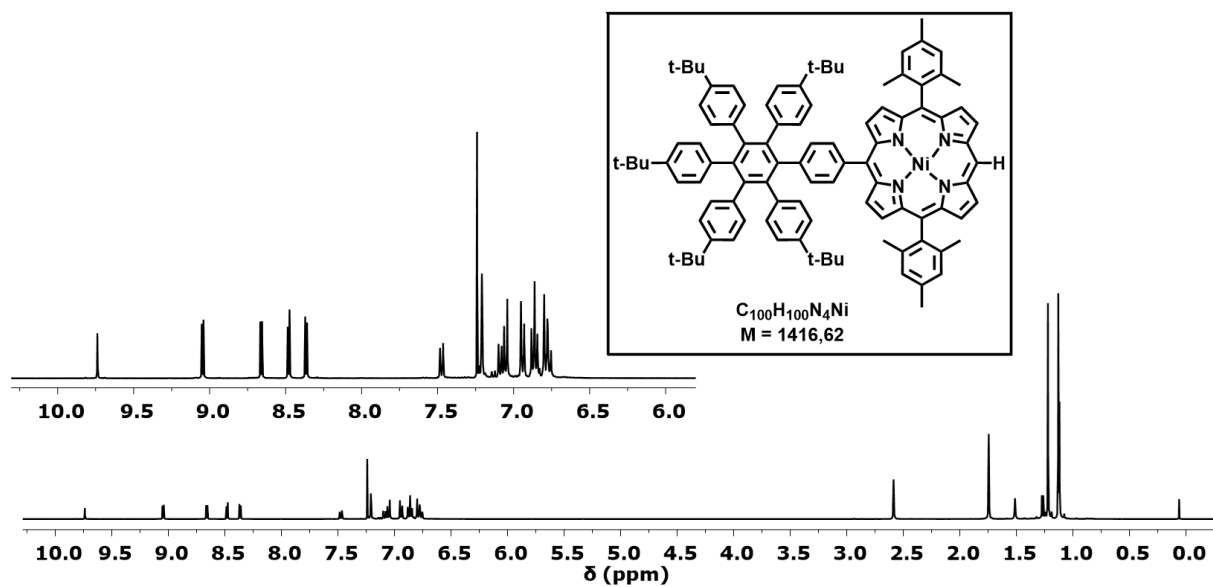

$^{13}\text{C}$  NMR (101 MHz,  $\text{CDCl}_3$ , rt)

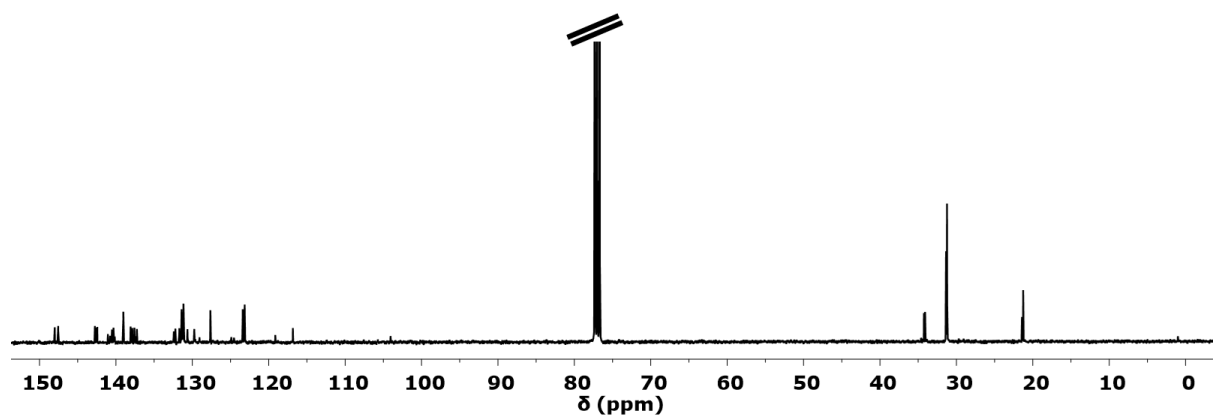

Figure S22.  $^1\text{H}$  and  $^{13}\text{C}$  NMR of 14.

## MS (MALDI)

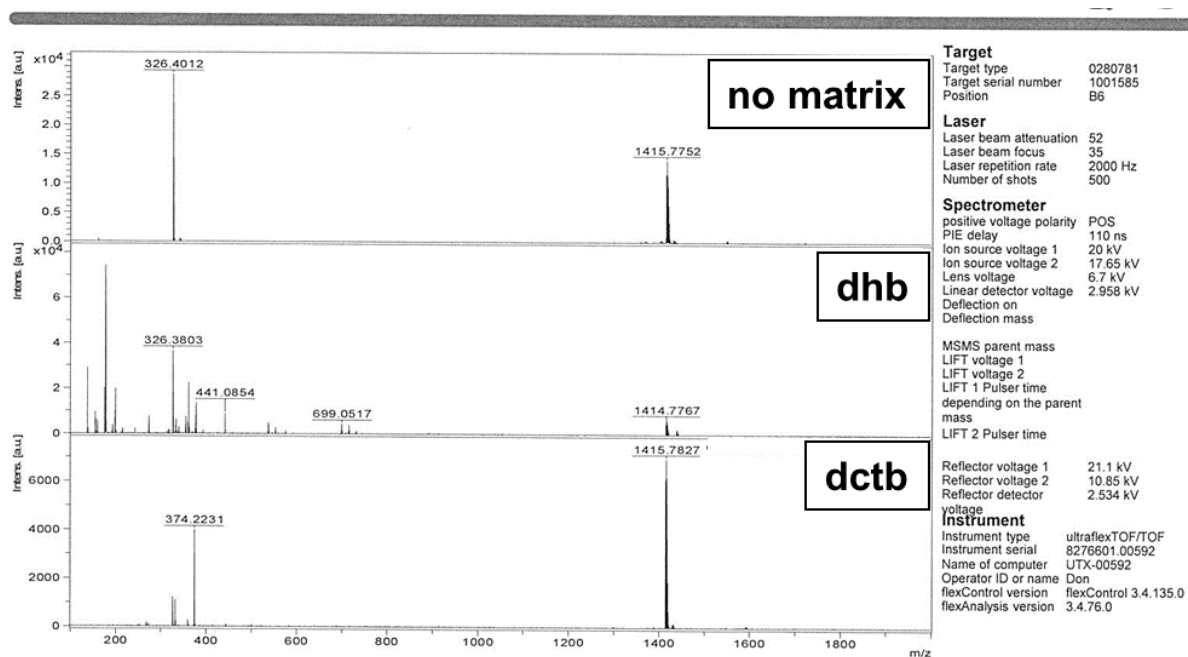

## HRMS (MALDI)

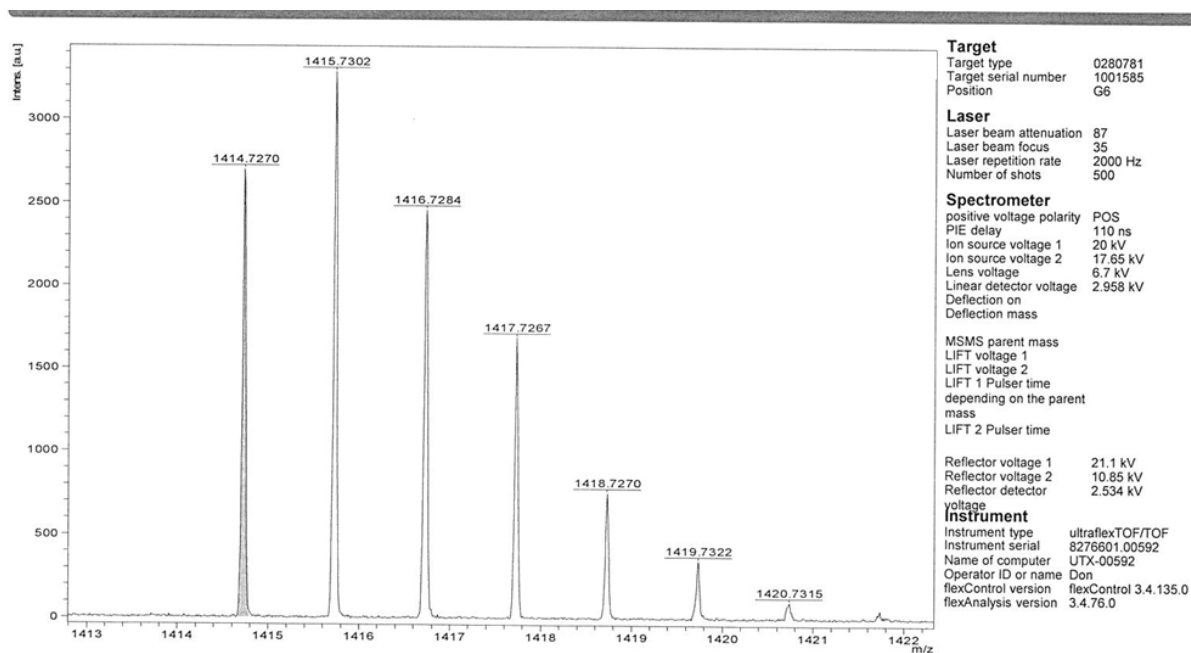

## SmartFormula

| Formula               | Mass       | Error  | mSigma  | DbIEq | N rule | Electron Configuration |
|-----------------------|------------|--------|---------|-------|--------|------------------------|
| C 100 H<br>100 N 4 Ni | 1,414.7296 | 1.8215 | 74.2823 | 53.00 | ok     | odd                    |

Figure S23. MS/HRMS (MALDI) of 14.

$^1\text{H}$  NMR (400 MHz,  $\text{CDCl}_3$ , rt)

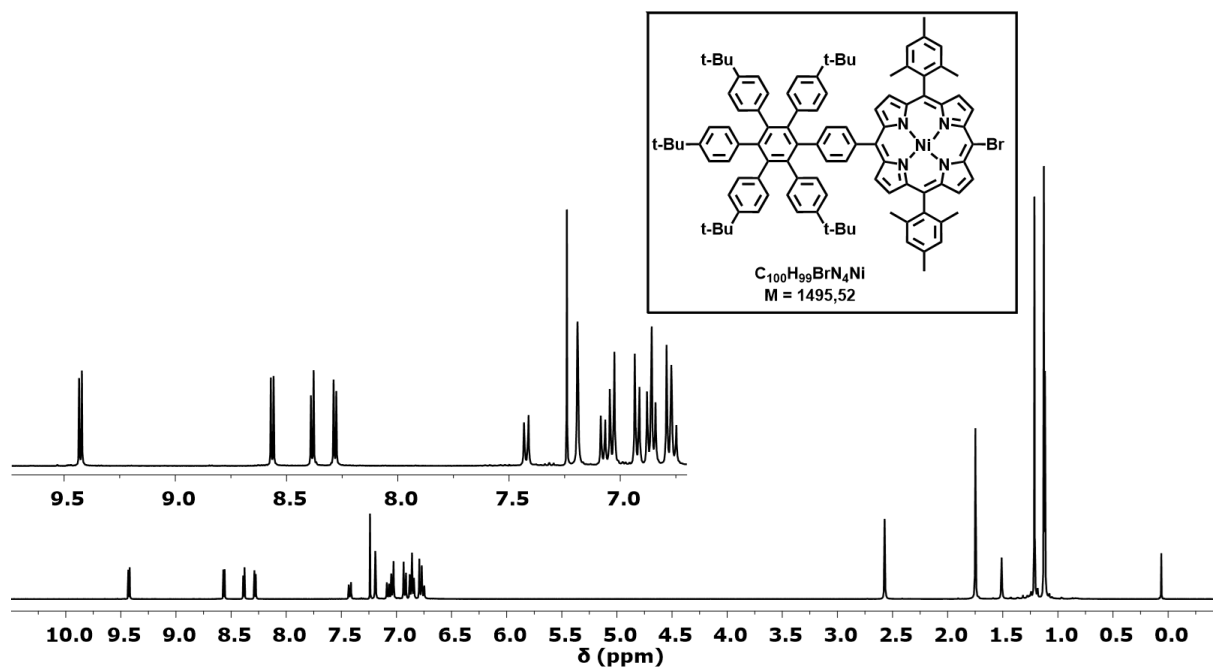

$^{13}\text{C}$  NMR (101 MHz,  $\text{CDCl}_3$ , rt)

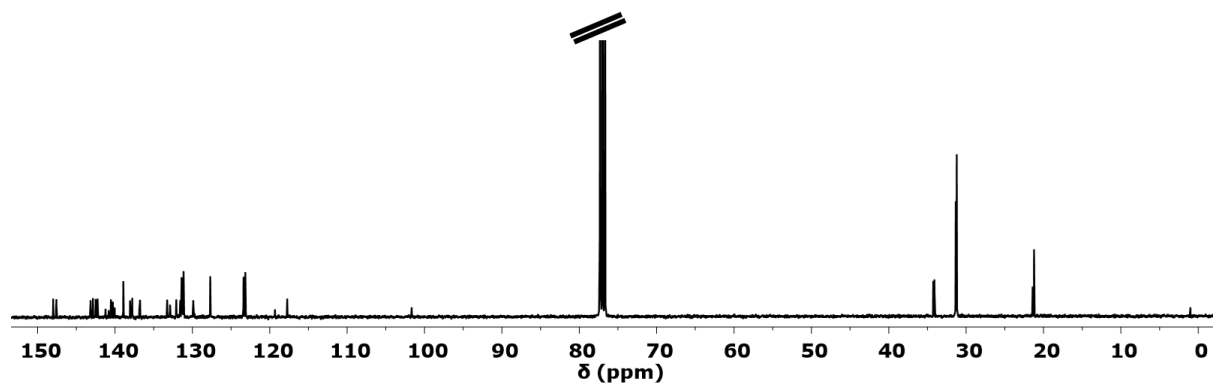

Figure S24.  $^1\text{H}$  and  $^{13}\text{C}$  NMR of 15.



## MS (MALDI)

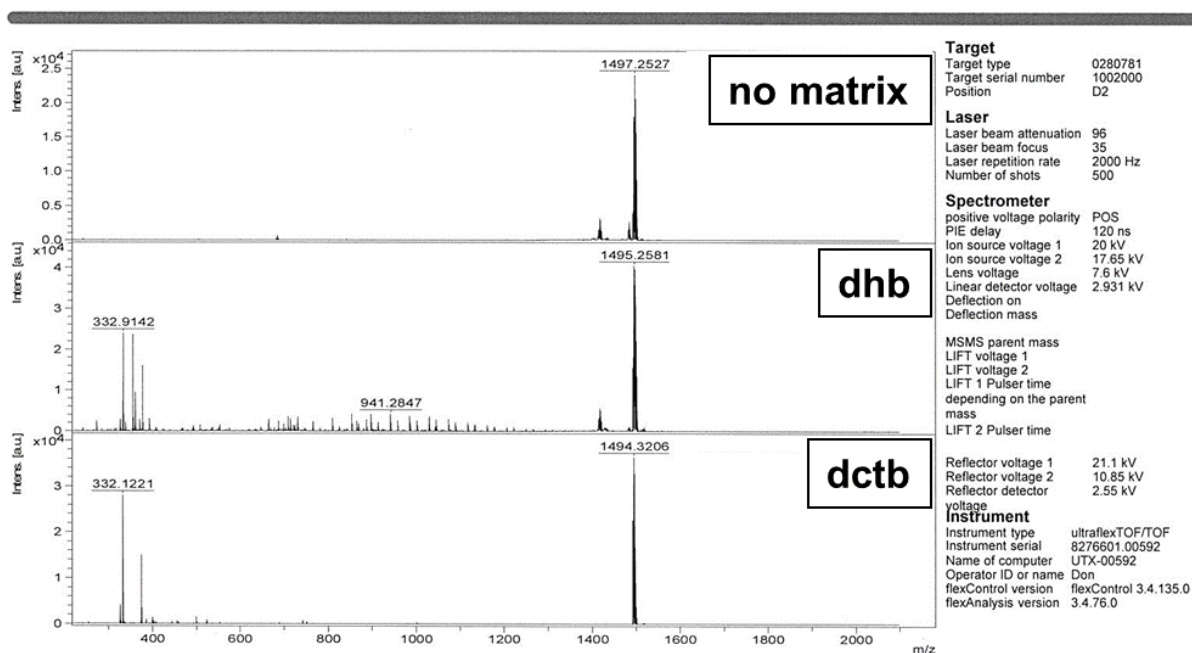

## HRMS (MALDI)

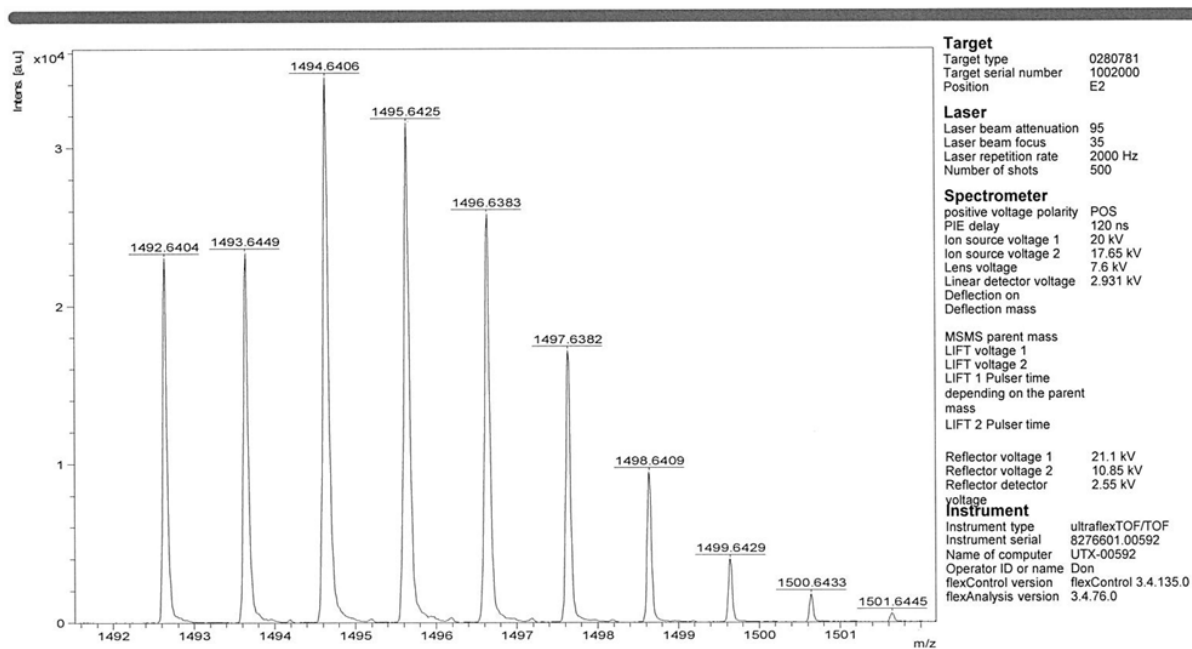

## SmartFormula

| Formula                    | Mass       | Error  | mSigma  | DbEq  | N rule | Electron Configuration |
|----------------------------|------------|--------|---------|-------|--------|------------------------|
| C 100 H<br>99 Br N 4<br>Ni | 1,492.6401 | 0.1725 | 71.1901 | 53.00 | ok     | odd                    |

Figure S25. MS/HRMS (MALDI) of 15.

$^1\text{H}$  NMR (601 MHz,  $\text{CD}_2\text{Cl}_2$ , rt)

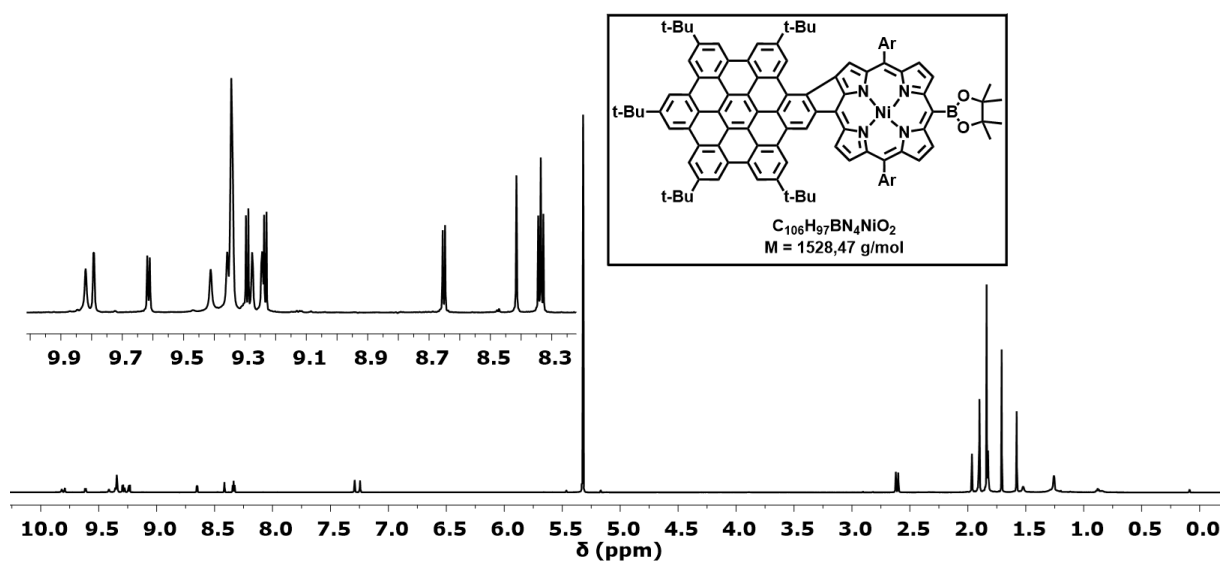

$^{13}\text{C}$  NMR - DEPTQ135 (151 MHz,  $\text{CD}_2\text{Cl}_2$ , rt)

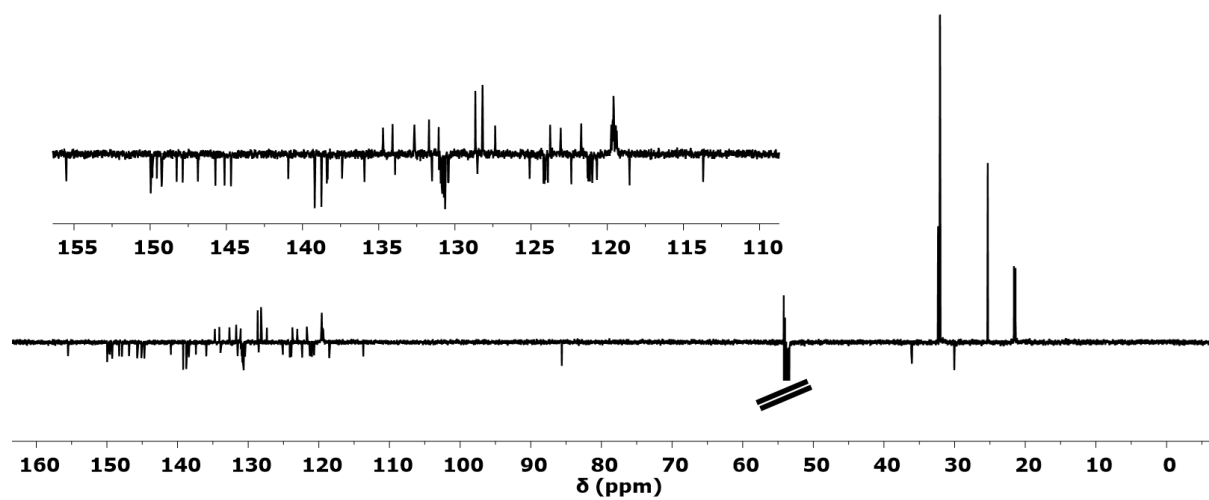

Figure S26.  $^1\text{H}$  and  $^{13}\text{C}$  NMR (DEPTQ135) of HCBpin.

$^1\text{H}$ - $^1\text{H}$  COSY (601 MHz,  $\text{CD}_2\text{Cl}_2$ , rt)

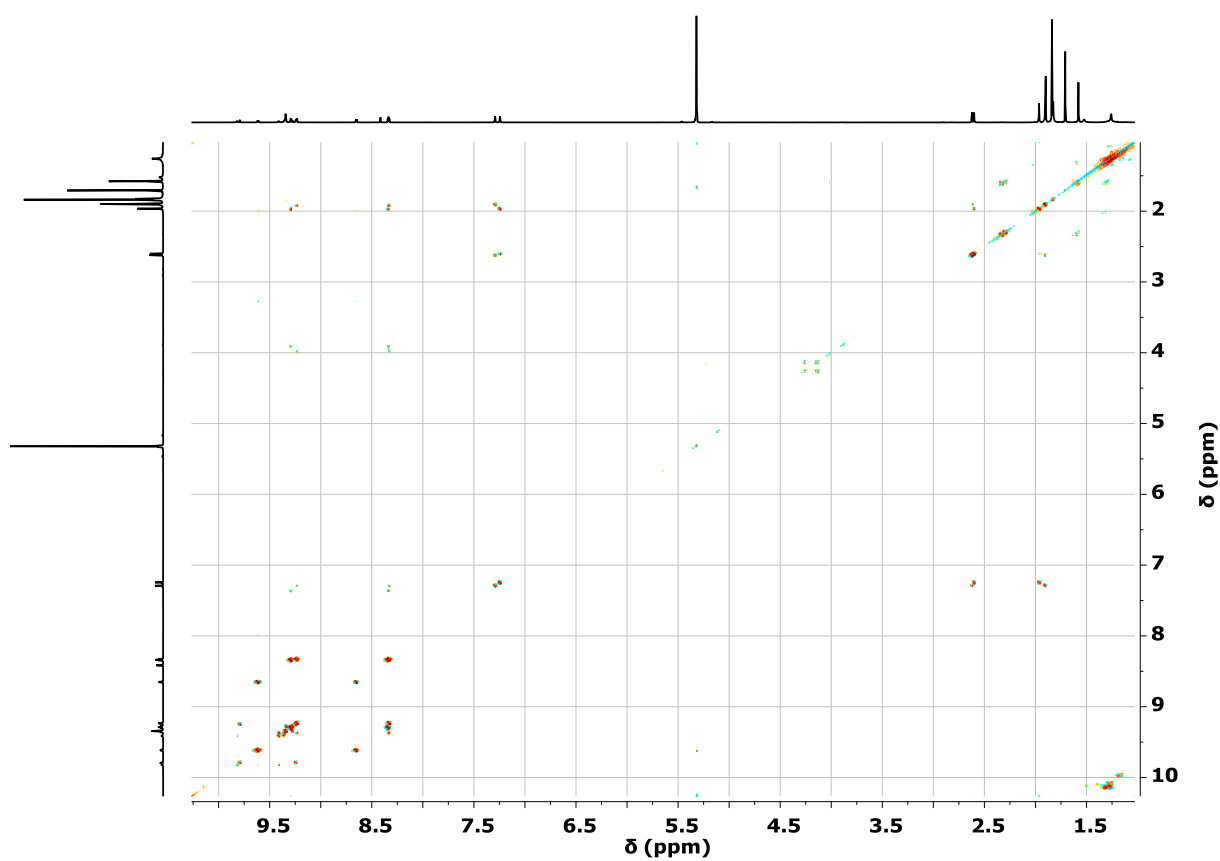

Figure S27.  $^1\text{H}$ - $^1\text{H}$  COSY of HBCBpin.

$^1\text{H}$ - $^{13}\text{C}$  HSQC (601 MHz,  $\text{CD}_2\text{Cl}_2$ , rt)

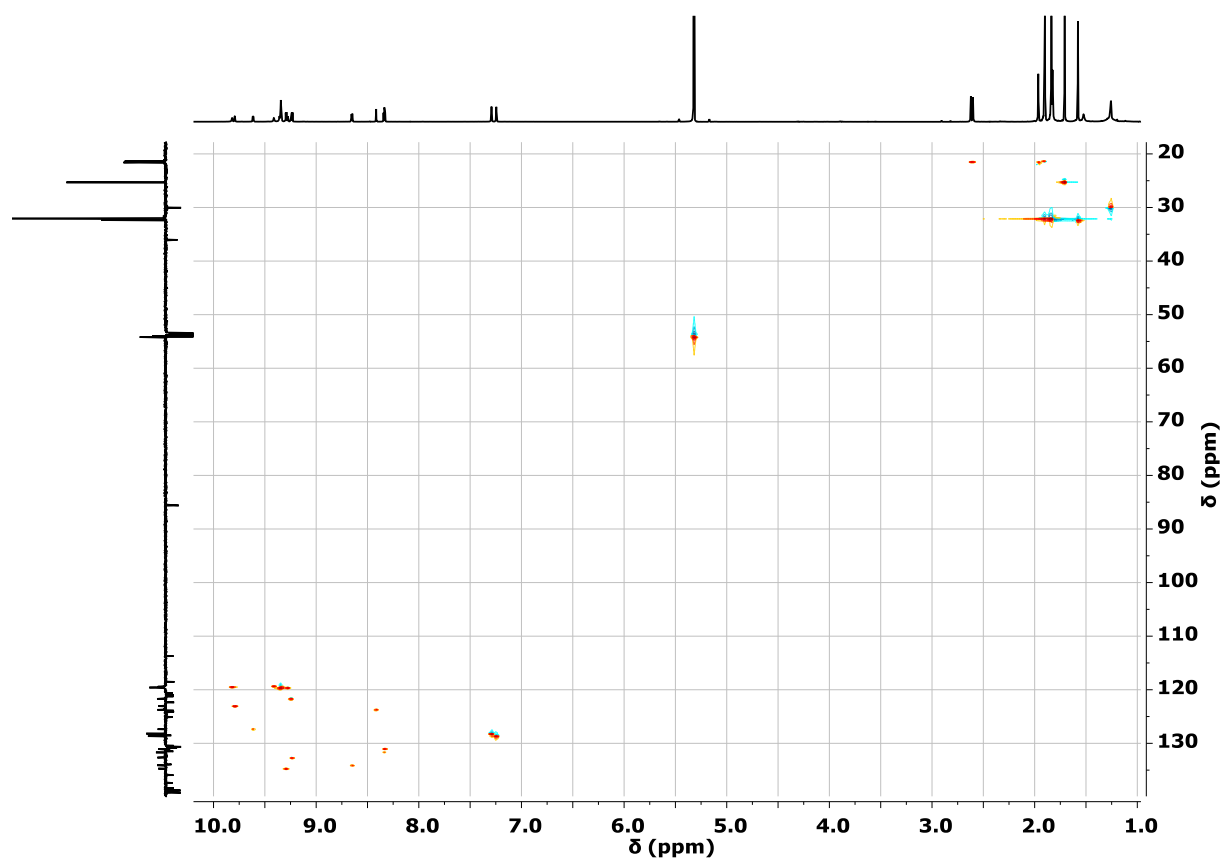

Figure S28.  $^1\text{H}$ - $^{13}\text{C}$  HSQC of HBCBpin.

$^1\text{H}$ - $^{13}\text{C}$  HMBC (601 MHz,  $\text{CD}_2\text{Cl}_2$ , rt)

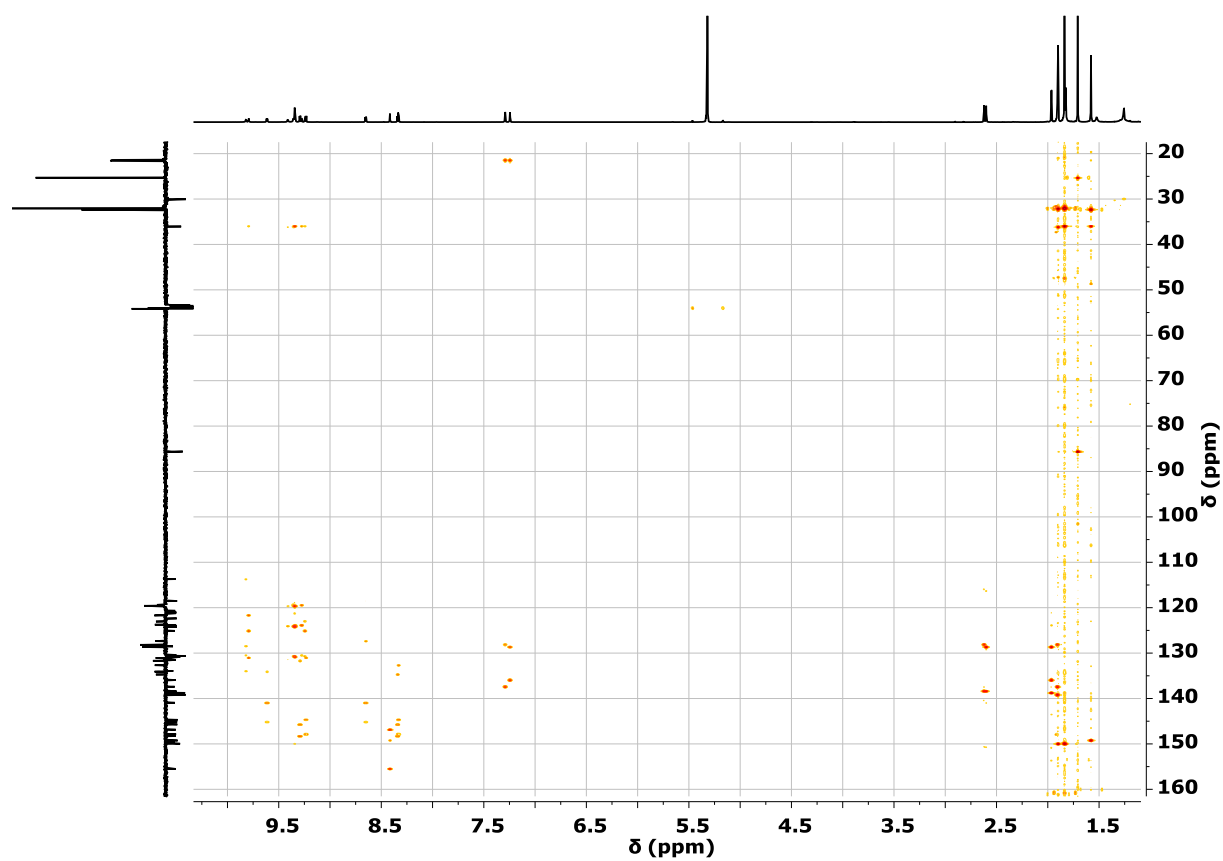

Figure S29.  $^1\text{H}$ - $^{13}\text{C}$  HMBC of HBCBpin.

$^1\text{H}$ - $^1\text{H}$  ROESY (601 MHz,  $\text{CD}_2\text{Cl}_2$ , rt)

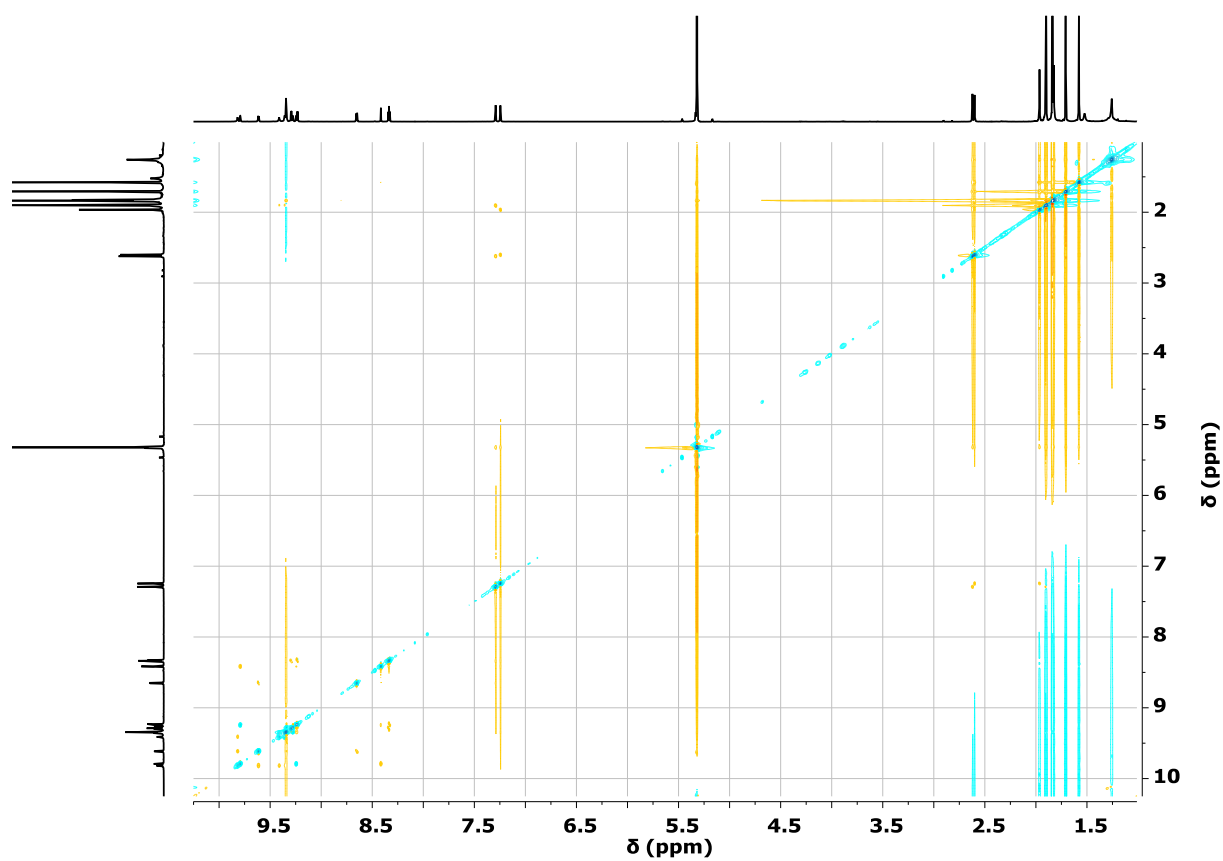

Figure S30.  $^1\text{H}$ - $^1\text{H}$  ROESY of HBCBpin.

## MS (MALDI)

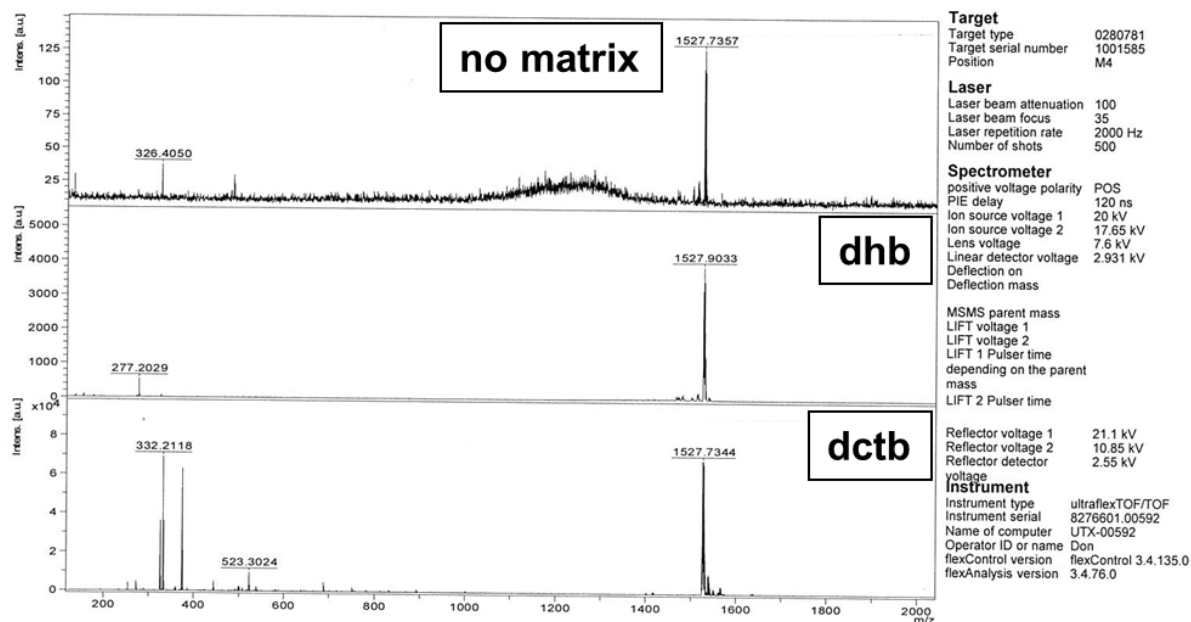

## HRMS (MALDI)

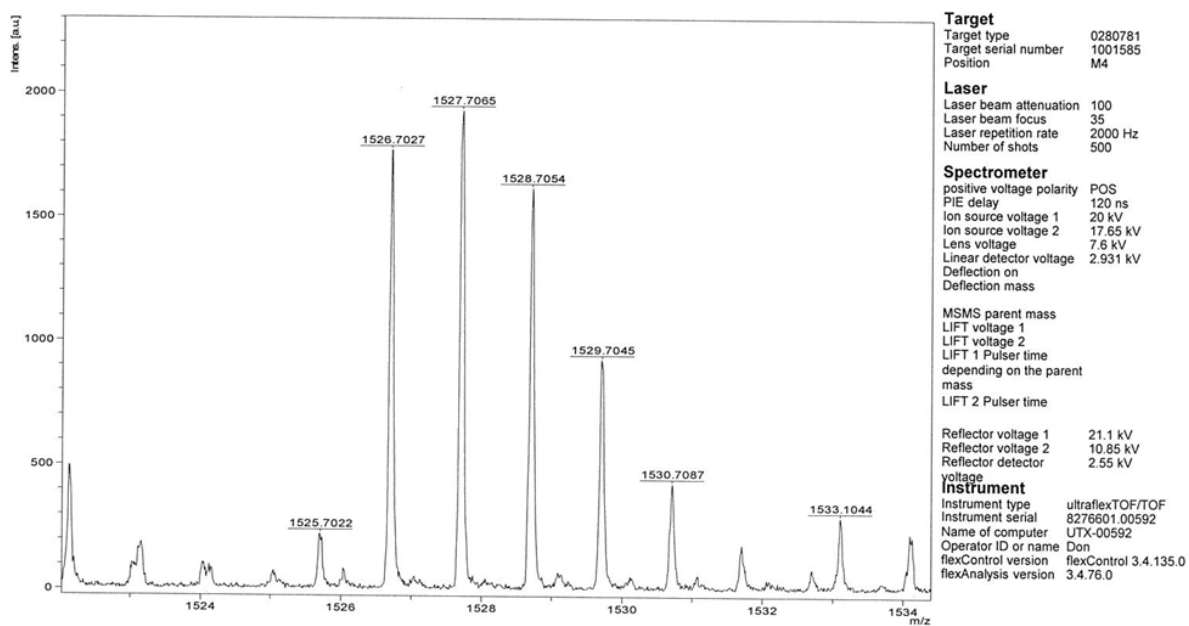

## SmartFormula

| Formula                       | Mass       | Error  | mSigma  | DbIEq | N rule | Electron Configuration |
|-------------------------------|------------|--------|---------|-------|--------|------------------------|
| C 106 H<br>97 B N 4<br>Ni O 2 | 1,526.7053 | 1.6935 | 69.4832 | 61.00 | ok     | odd                    |

Figure S31. MS/HRMS (MALDI) of HCBPpin.

$^1\text{H}$  NMR (400 MHz,  $\text{CDCl}_3$ , rt)

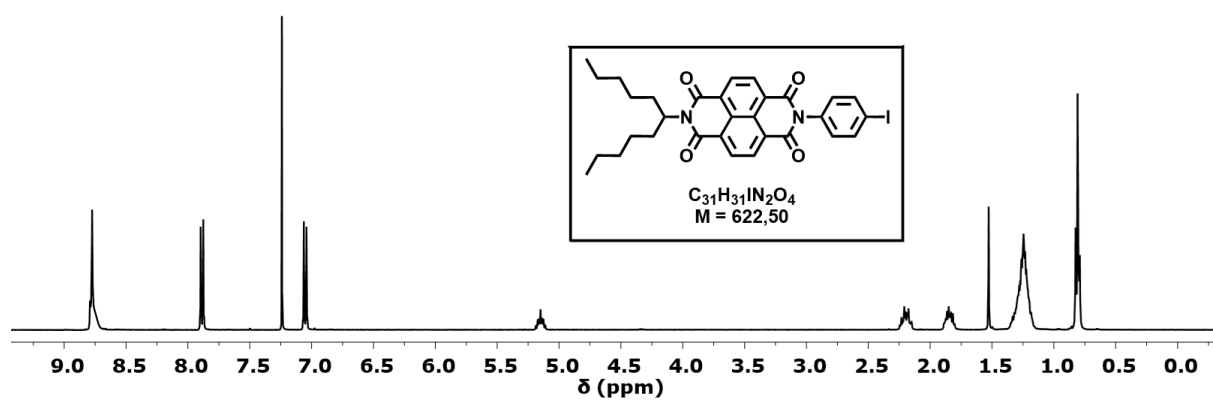

$^{13}\text{C}$  NMR (101 MHz,  $\text{CDCl}_3$ , rt)

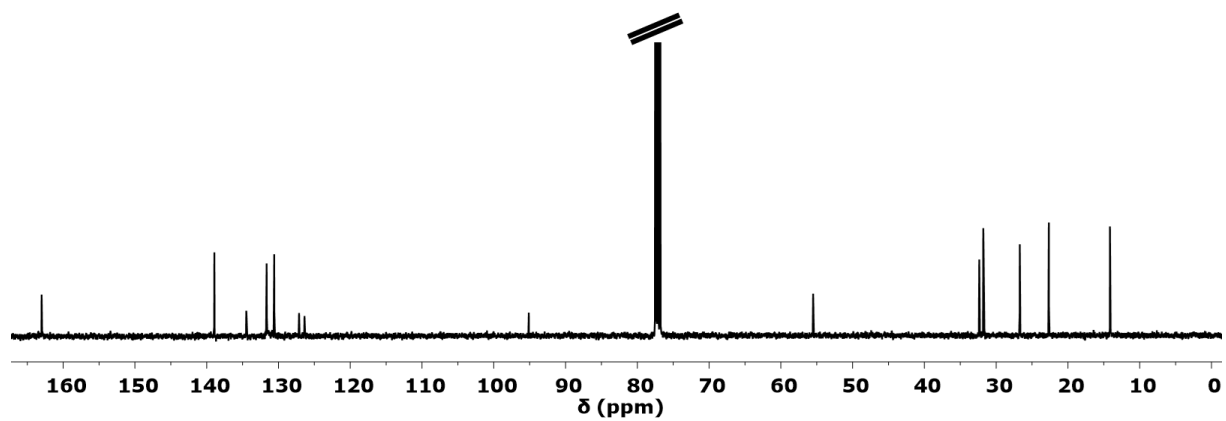

Figure S32.  $^1\text{H}$  and  $^{13}\text{C}$  NMR of I-NDI.



# HRMS (APPI)

## Display Report

|                      |                                                  |                  |                      |              |
|----------------------|--------------------------------------------------|------------------|----------------------|--------------|
| <b>Analysis Info</b> |                                                  | Acquisition Date | 6/4/2024 10:12:31 AM |              |
| Analysis Name        | D:\Data\2024\Hirsch - 2024\Schulze-ES 132-test.d | Operator         | MD                   |              |
| Method               | APPI_pos_low_13.d.m                              | Instrument       | maXis                | 288882 20183 |
| Sample Name          | Low Concentration Tunemix                        |                  |                      |              |
| Comment              | CH2Cl2                                           |                  |                      |              |

|                              |            |                      |          |                  |           |
|------------------------------|------------|----------------------|----------|------------------|-----------|
| <b>Acquisition Parameter</b> |            |                      |          |                  |           |
| Source Type                  | APPI       | Ion Polarity         | Positive | Set Nebulizer    | 5.2 Bar   |
| Focus                        | Not active | Set Capillary        | 700 V    | Set Dry Heater   | 220 °C    |
| Scan Begin                   | 80 m/z     | Set End Plate Offset | -500 V   | Set Dry Gas      | 1.2 l/min |
| Scan End                     | 1550 m/z   | Set Charging Voltage | 0 V      | Set Divert Valve | Waste     |
|                              |            | Set Corona           | 0 nA     | Set APCI Heater  | 250 °C    |

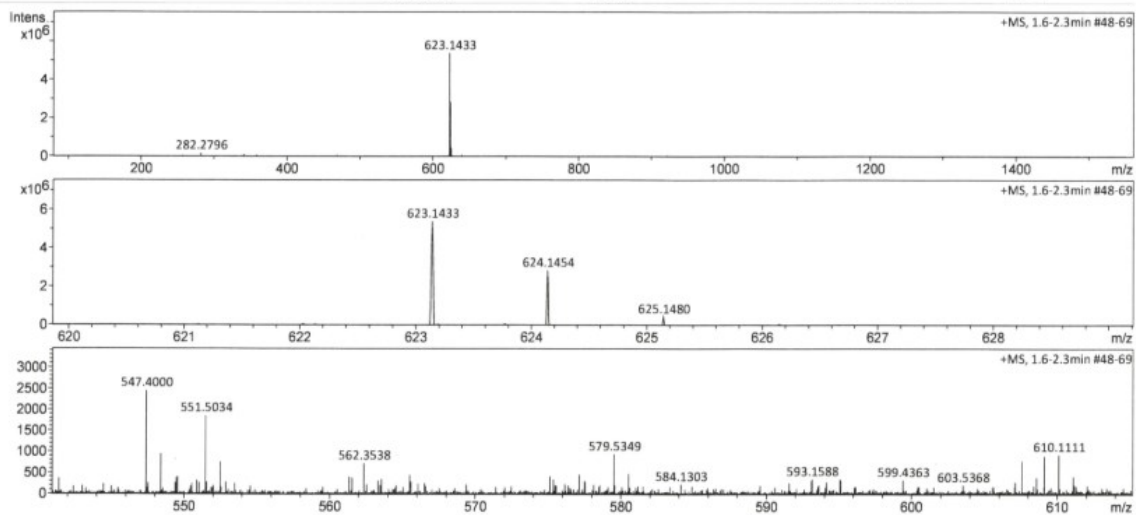

Schulze-ES 132-test.d  
Bruker Compass DataAnalysis 4.2  
printed: 6/4/2024 10:17:11 AM  
by: MD  
Page 1 of 1

Figure S33. MS/HRMS (APPI) of I-NDI.

$^1\text{H}$  NMR (400 MHz, DMSO- $d_6$ , rt)

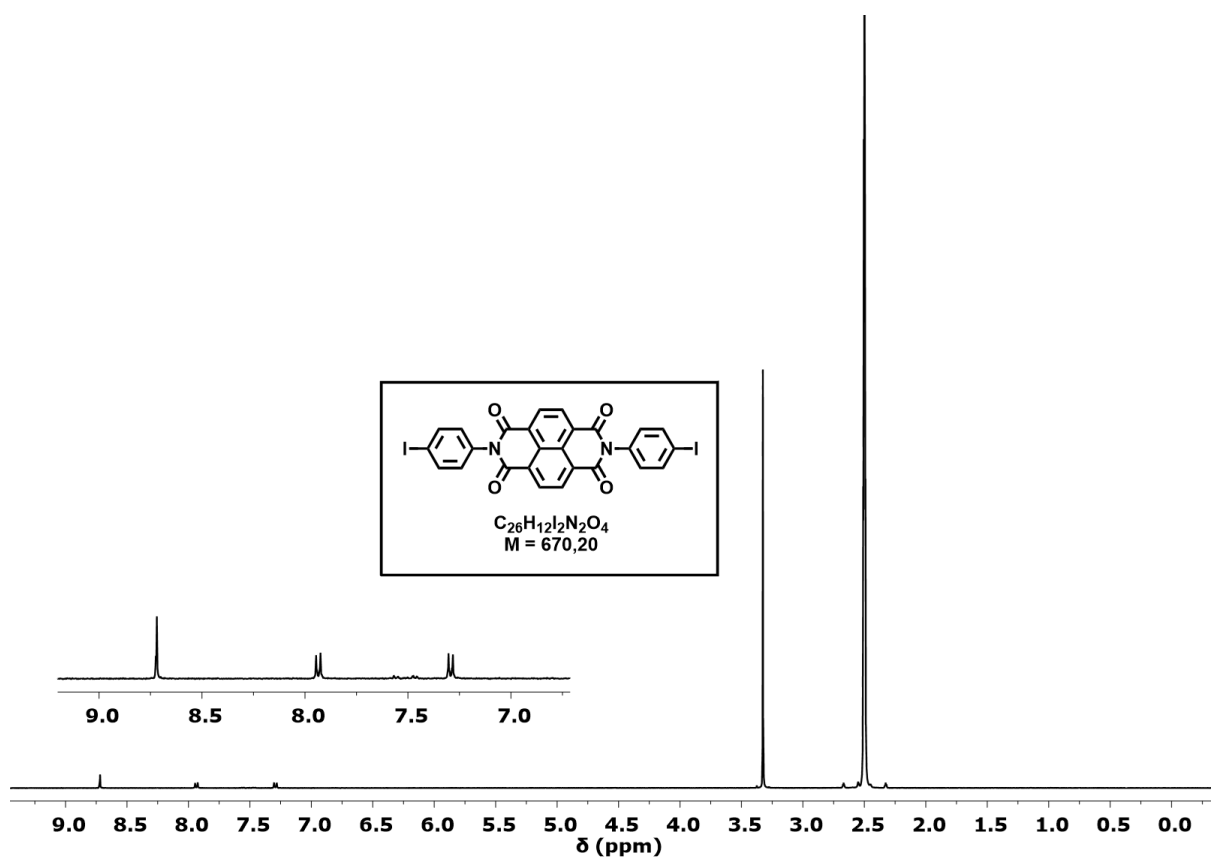

Figure S34.  $^1\text{H}$  NMR of I-NDI-I.

# HRMS (APPI)

## Display Report

|                      |                                                     |                  |                     |              |
|----------------------|-----------------------------------------------------|------------------|---------------------|--------------|
| <b>Analysis Info</b> |                                                     | Acquisition Date | 6/4/2024 3:04:55 PM |              |
| Analysis Name        | D:\Data\2024\Hirsch-2024\Schulze-KS-4-test--appi-.d | Operator         | MD                  |              |
| Method               | APPI_pos_low_13.d.m                                 | Instrument       | maXis               | 288882.20183 |
| Sample Name          | Low Concentration Tunemix                           |                  |                     |              |
| Comment              | CH2Cl2                                              |                  |                     |              |

|                              |            |                      |          |                  |           |
|------------------------------|------------|----------------------|----------|------------------|-----------|
| <b>Acquisition Parameter</b> |            |                      |          |                  |           |
| Source Type                  | APPI       | Ion Polarity         | Positive | Set Nebulizer    | 5.2 Bar   |
| Focus                        | Not active | Set Capillary        | 700 V    | Set Dry Heater   | 220 °C    |
| Scan Begin                   | 80 m/z     | Set End Plate Offset | -500 V   | Set Dry Gas      | 1.2 l/min |
| Scan End                     | 1550 m/z   | Set Charging Voltage | 0 V      | Set Divert Valve | Waste     |
|                              |            | Set Corona           | 0 nA     | Set APCI Heater  | 250 °C    |

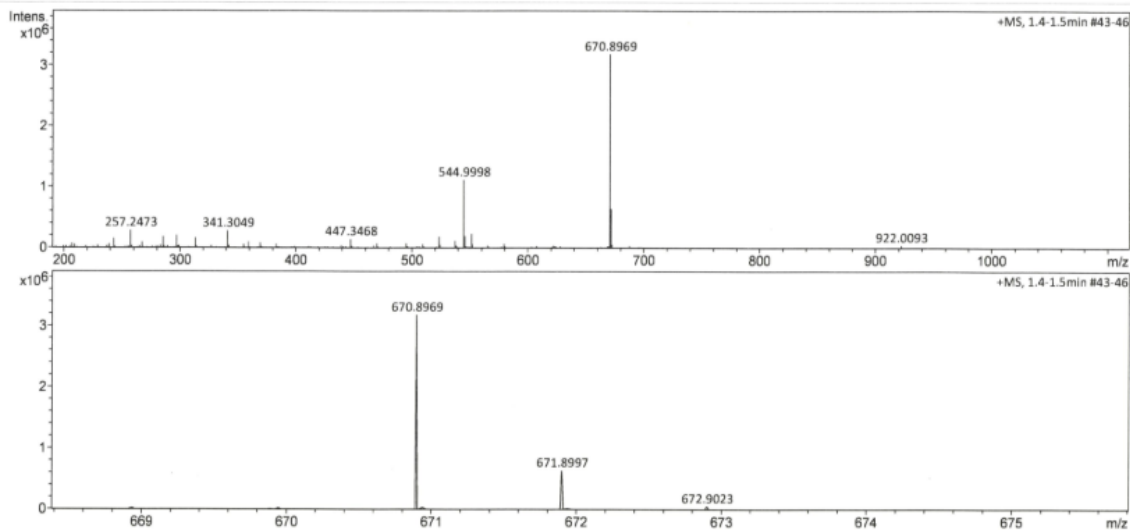

Schulze-KS-4-test--appi-.d  
Bruker Compass DataAnalysis 4.2 printed: 6/4/2024 3:08:45 PM by: MD Page 1 of 1

Figure S35. MS/HRMS (APPI) of I-NDI-I.

$^1\text{H}$  NMR (400 MHz,  $\text{CDCl}_3$ , rt)

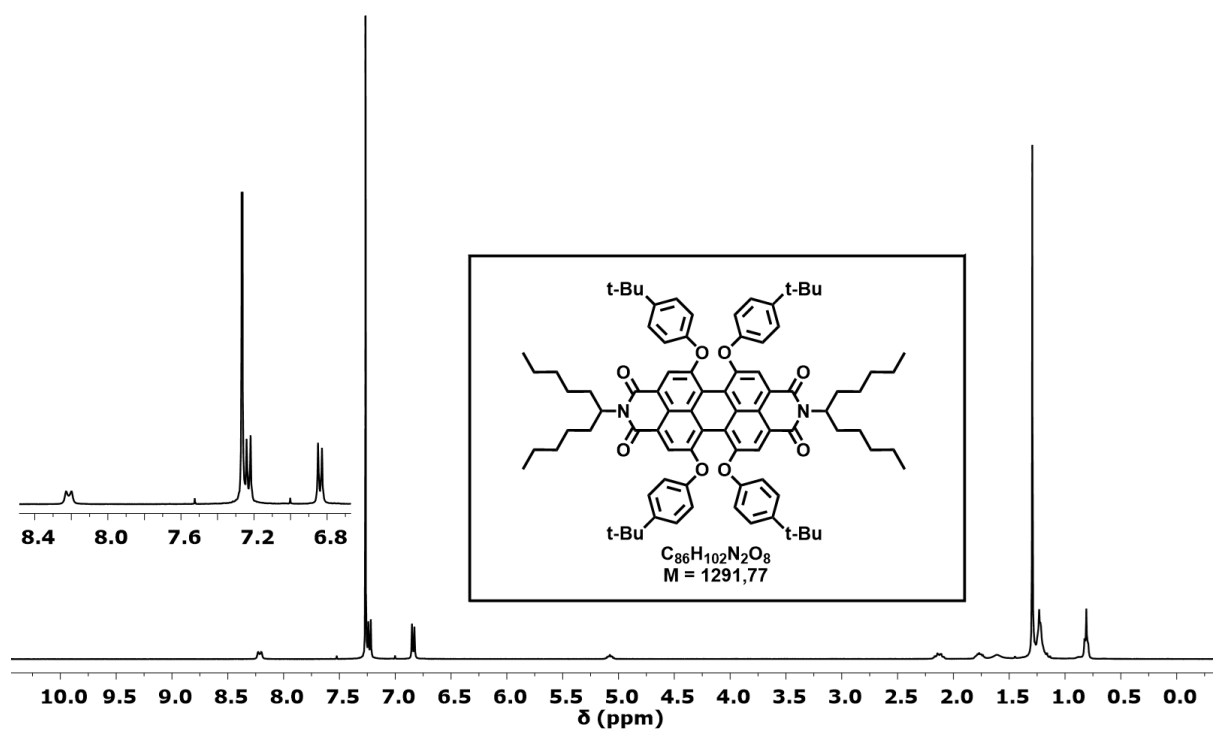

$^{13}\text{C}$  NMR (101 MHz,  $\text{CDCl}_3$ , rt)

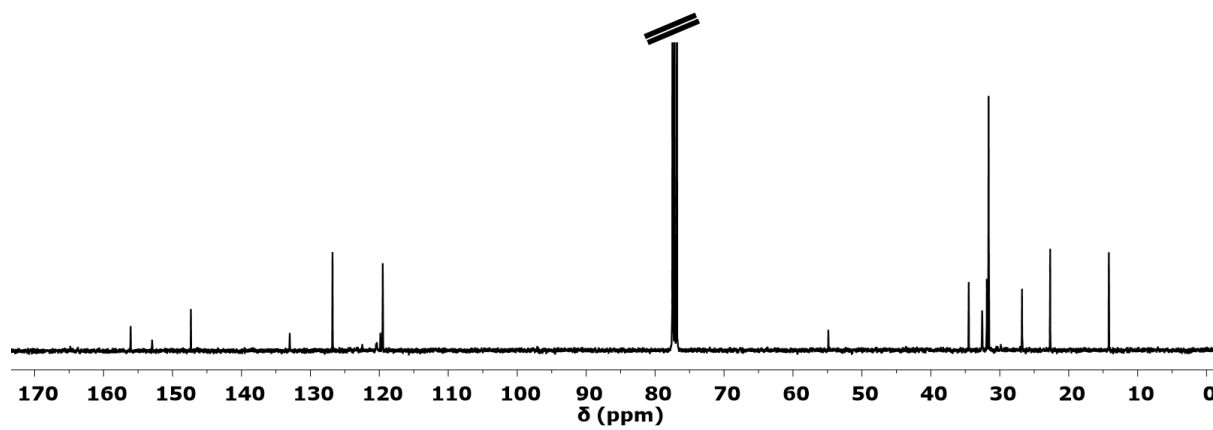

Figure S36.  $^1\text{H}$  and  $^{13}\text{C}$  NMR of 22.

# HRMS (APPI)

## Display Report

**Analysis Info**  
Analysis Name: D:\Data\2024\Hirsch-2024\Schulze-244-test-appi-d  
Acquisition Date: 6/4/2024 3:14:10 PM  
Method: APPI\_pos\_low\_t3.d.m  
Operator: MD  
Sample Name: Low Concentration Tunemix  
Instrument: maXis  
Comment: CH2Cl2  
288882.20183

**Acquisition Parameter**

|             |            |                      |          |                  |           |
|-------------|------------|----------------------|----------|------------------|-----------|
| Source Type | APPI       | Ion Polarity         | Positive | Set Nebulizer    | 5.2 Bar   |
| Focus       | Not active | Set Capillary        | 700 V    | Set Dry Heater   | 220 °C    |
| Scan Begin  | 80 m/z     | Set End Plate Offset | -500 V   | Set Dry Gas      | 1.2 l/min |
| Scan End    | 1550 m/z   | Set Charging Voltage | 0 V      | Set Divert Valve | Waste     |
|             |            | Set Corona           | 0 nA     | Set APCI Heater  | 300 °C    |

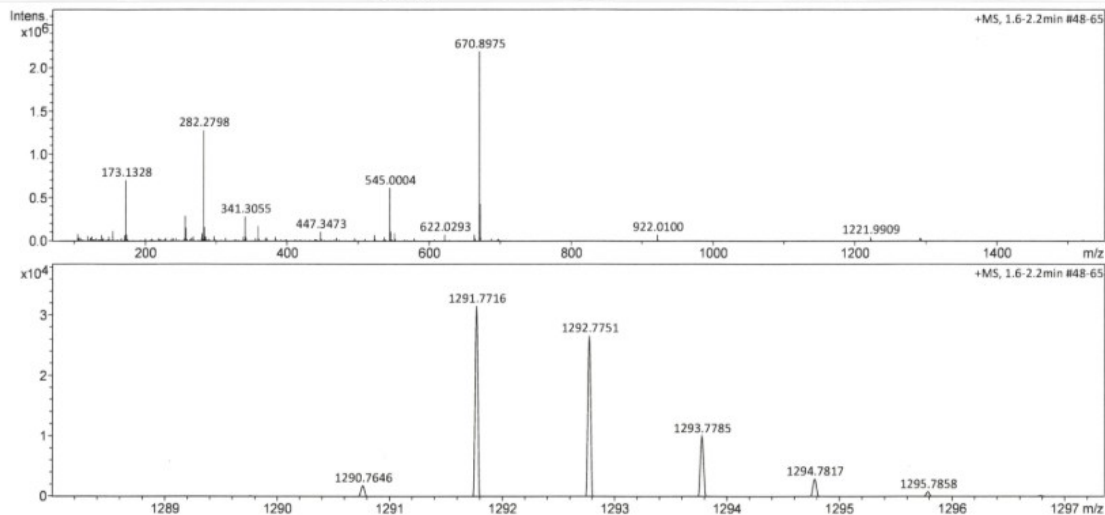

Schulze-244-test-appi-d  
Bruker Compass DataAnalysis 4.2  
printed: 6/4/2024 3:26:39 PM  
by: MD  
Page 1 of 1

Figure S37. MS/HRMS (APPI) of 22.

$^1\text{H}$  NMR (400 MHz,  $\text{CDCl}_3$ , rt)

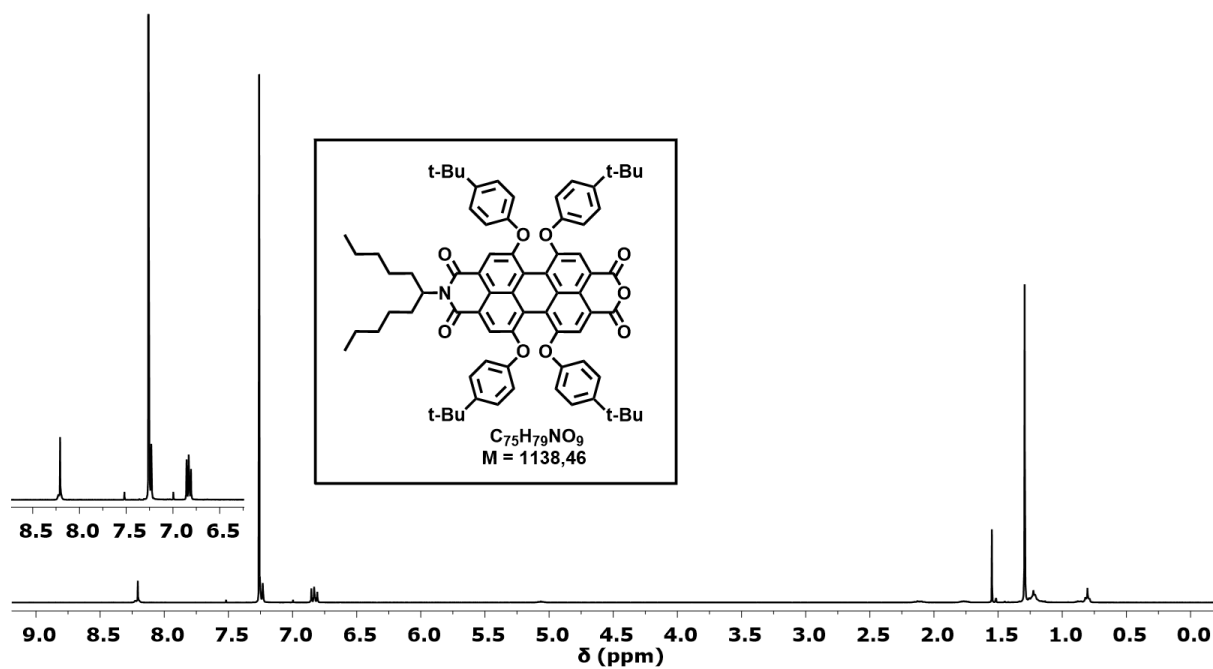

$^{13}\text{C}$  NMR (101 MHz,  $\text{CDCl}_3$ , rt)

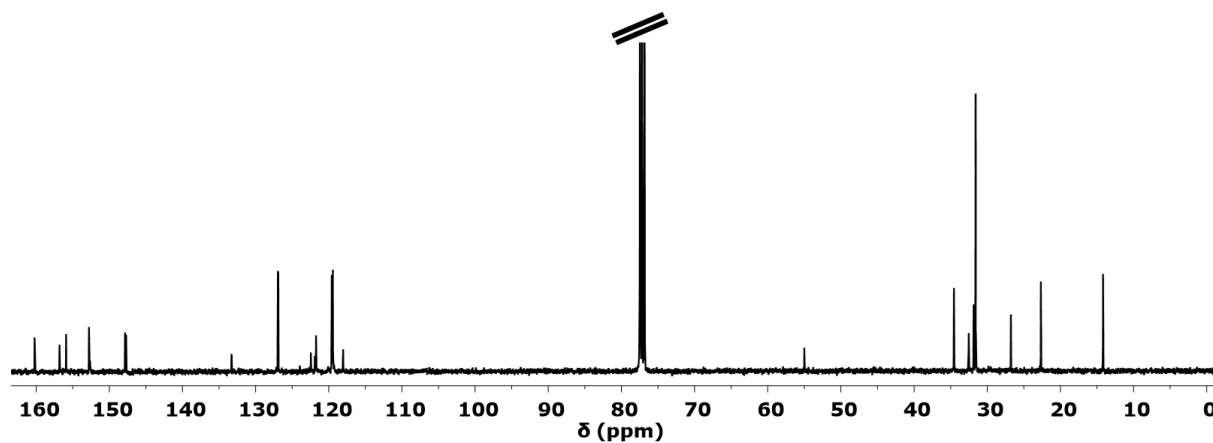

Figure S38.  $^1\text{H}$  and  $^{13}\text{C}$  NMR of 23.

# HRMS (APPI)

## Display Report

**Analysis Info**  
Analysis Name: D:\Data\2024\Hirsch-2024\Schulze-ES 245-test.d  
Method: APPI\_pos\_low\_t3.d.m  
Sample Name: Low Concentration Tunemix  
Comment: CH2Cl2  
Acquisition Date: 6/4/2024 10:22:47 AM  
Operator: MD  
Instrument: maXis  
288882.20183

**Acquisition Parameter**  
Source Type: APPI  
Focus: Not active  
Scan Begin: 80 m/z  
Scan End: 1550 m/z  
Ion Polarity: Positive  
Set Capillary: 700 V  
Set End Plate Offset: -500 V  
Set Charging Voltage: 0 V  
Set Corona: 0 nA  
Set Nebulizer: 5.2 Bar  
Set Dry Heater: 220 °C  
Set Dry Gas: 1.2 l/min  
Set Divert Valve: Waste  
Set APCI Heater: 250 °C

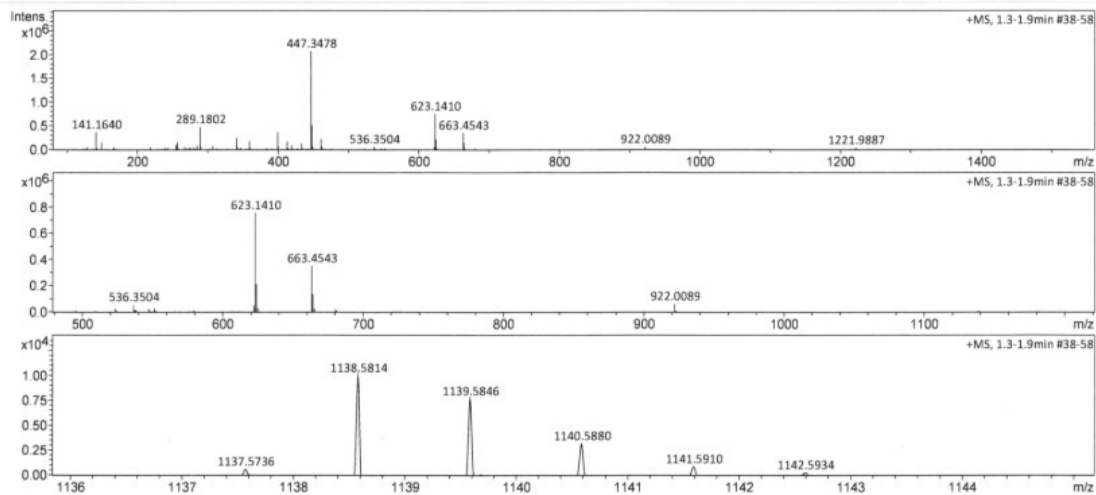

Schulze-ES 245-test.d  
Bruker Compass DataAnalysis 4.2  
printed: 6/4/2024 10:27:46 AM  
by: MD  
Page 1 of 1

Figure S39. MS/HRMS (APPI) of 23.

$^1\text{H}$  NMR (400 MHz,  $\text{CDCl}_3$ , rt)

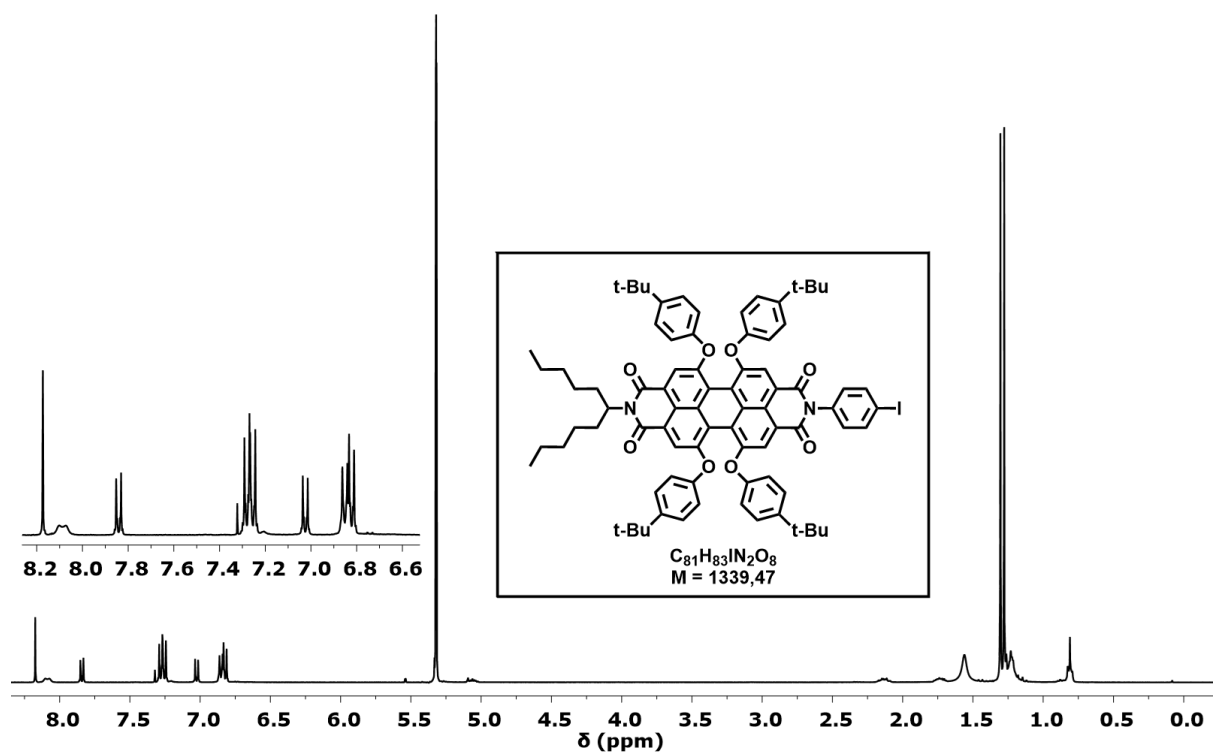

$^{13}\text{C}$  NMR (101 MHz,  $\text{CDCl}_3$ , rt)

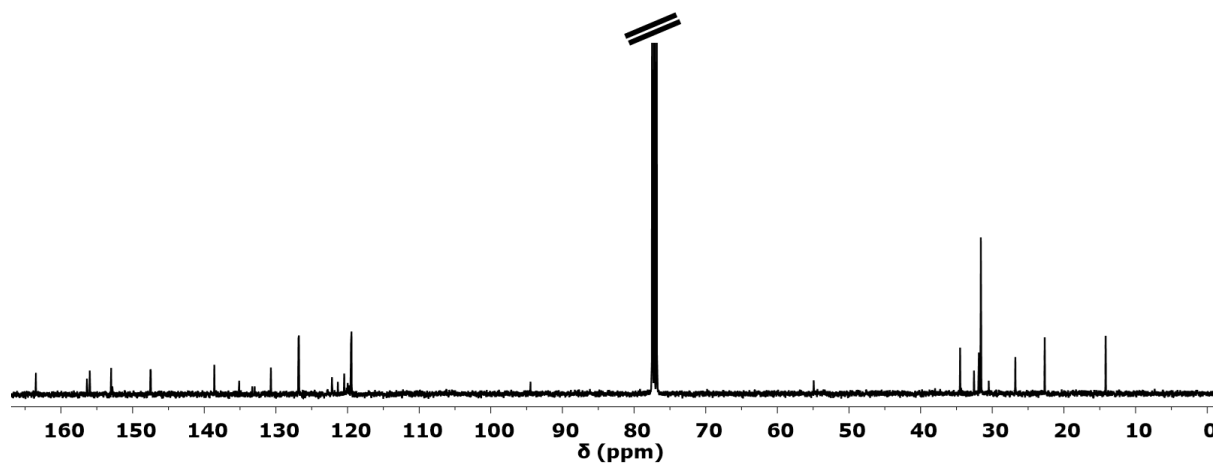

Figure S40.  $^1\text{H}$  and  $^{13}\text{C}$  NMR of I-PDI.



# HRMS (APPI)

## Display Report

|                      |                                                   |                  |                      |              |
|----------------------|---------------------------------------------------|------------------|----------------------|--------------|
| <b>Analysis Info</b> |                                                   | Acquisition Date | 6/4/2024 11:08:04 AM |              |
| Analysis Name        | D:\Data\2024\Hirsch -2024\Schulze-ES 246-appi-2.d | Operator         | MD                   |              |
| Method               | tune_mid_pos_APPI.m                               | Instrument       | maXis                | 288882.20183 |
| Sample Name          | Low Concentration Tunemix                         |                  |                      |              |
| Comment              | CH2Cl2                                            |                  |                      |              |

|                              |            |                      |          |                  |           |
|------------------------------|------------|----------------------|----------|------------------|-----------|
| <b>Acquisition Parameter</b> |            |                      |          |                  |           |
| Source Type                  | APPI       | Ion Polarity         | Positive | Set Nebulizer    | 2.5 Bar   |
| Focus                        | Not active | Set Capillary        | 750 V    | Set Dry Heater   | 200 °C    |
| Scan Begin                   | 300 m/z    | Set End Plate Offset | -500 V   | Set Dry Gas      | 1.5 l/min |
| Scan End                     | 2900 m/z   | Set Charging Voltage | 0 V      | Set Divert Valve | Waste     |
|                              |            | Set Corona           | 0 nA     | Set APCI Heater  | 300 °C    |

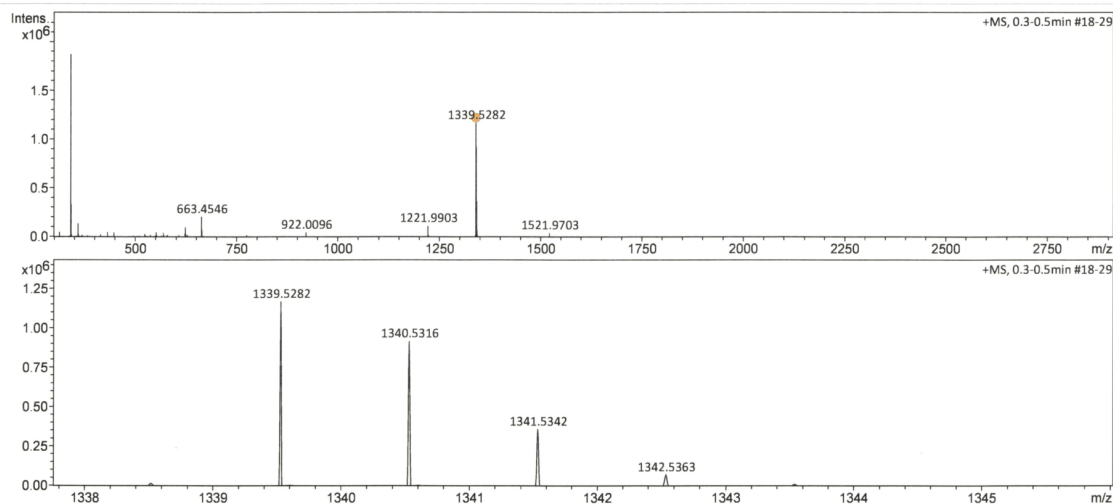

## Mass Spectrum SmartFormula Report

|                      |                                                   |                  |                      |              |
|----------------------|---------------------------------------------------|------------------|----------------------|--------------|
| <b>Analysis Info</b> |                                                   | Acquisition Date | 6/4/2024 11:08:04 AM |              |
| Analysis Name        | D:\Data\2024\Hirsch -2024\Schulze-ES 246-appi-2.d | Operator         | MD                   |              |
| Method               | tune_mid_pos_APPI.m                               | Instrument       | maXis                | 288882.20183 |
| Sample Name          | Low Concentration Tunemix                         |                  |                      |              |
| Comment              | CH2Cl2                                            |                  |                      |              |

|                              |            |                      |          |                  |           |
|------------------------------|------------|----------------------|----------|------------------|-----------|
| <b>Acquisition Parameter</b> |            |                      |          |                  |           |
| Source Type                  | APPI       | Ion Polarity         | Positive | Set Nebulizer    | 2.5 Bar   |
| Focus                        | Not active | Set Capillary        | 750 V    | Set Dry Heater   | 200 °C    |
| Scan Begin                   | 300 m/z    | Set End Plate Offset | -500 V   | Set Dry Gas      | 1.5 l/min |
| Scan End                     | 2900 m/z   | Set Charging Voltage | 0 V      | Set Divert Valve | Waste     |
|                              |            | Set Corona           | 0 nA     | Set APCI Heater  | 300 °C    |

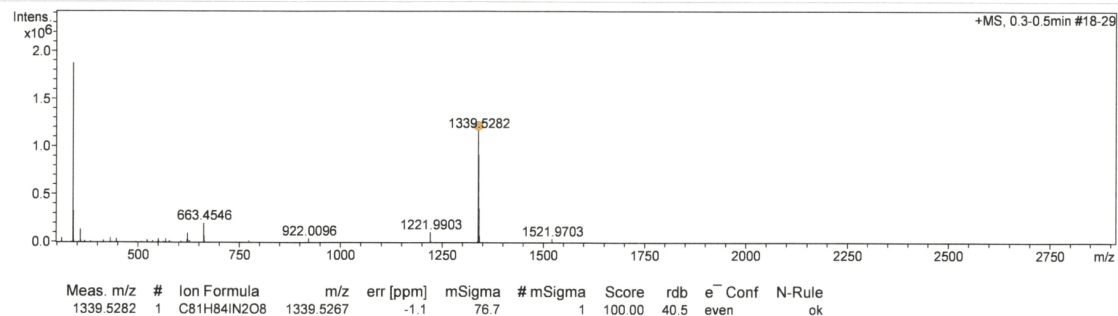

Figure S41. MS/HRMS (APPI) of I-PDI.

$^1\text{H}$  NMR (400 MHz,  $\text{CDCl}_3$ , rt)

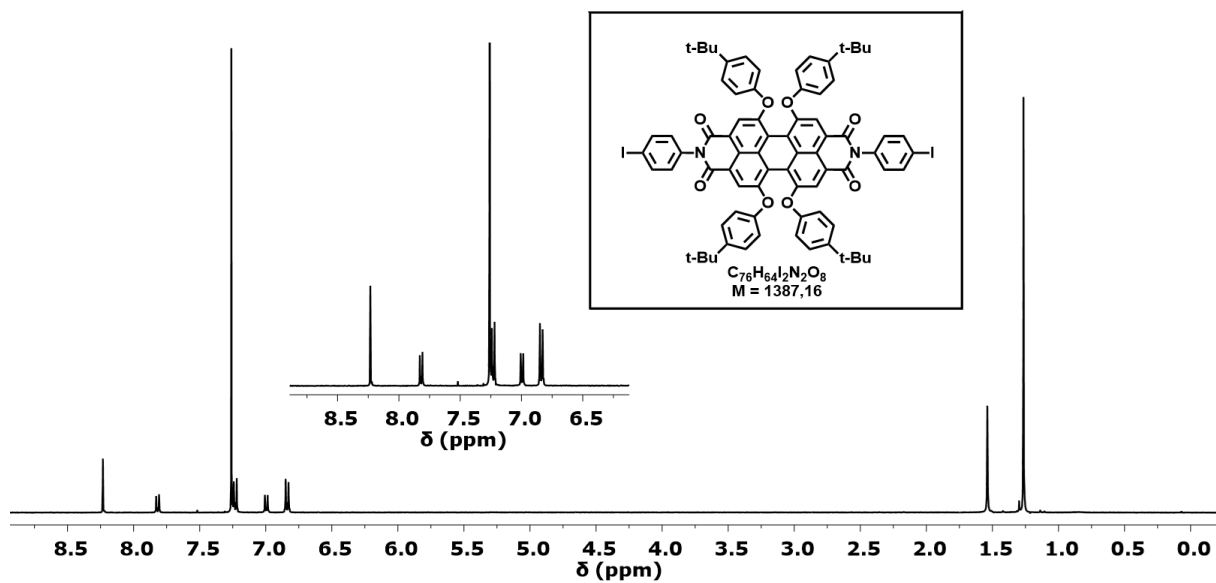

$^{13}\text{C}$  NMR (101 MHz,  $\text{CDCl}_3$ , rt)

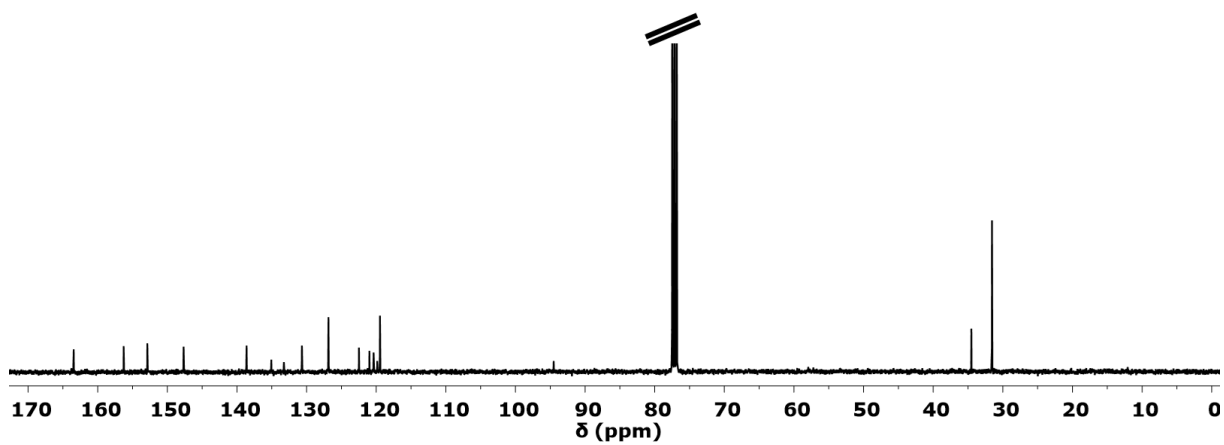

Figure S42.  $^1\text{H}$  and  $^{13}\text{C}$  NMR of I-PDI-I.

## MS (MALDI)

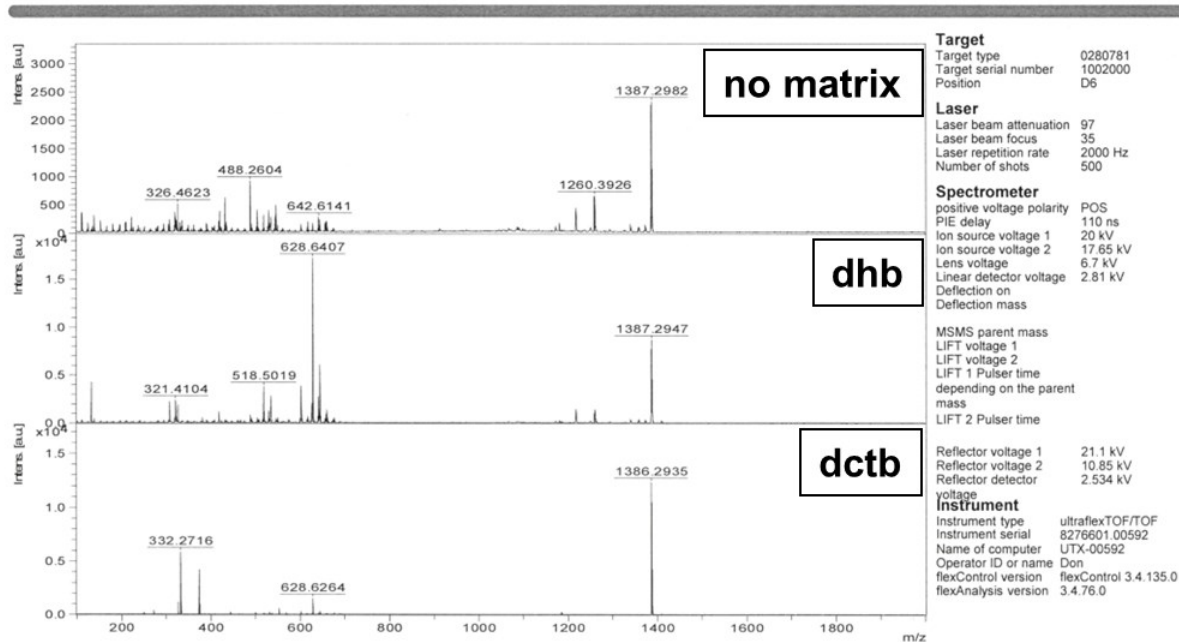

## HRMS (MALDI)

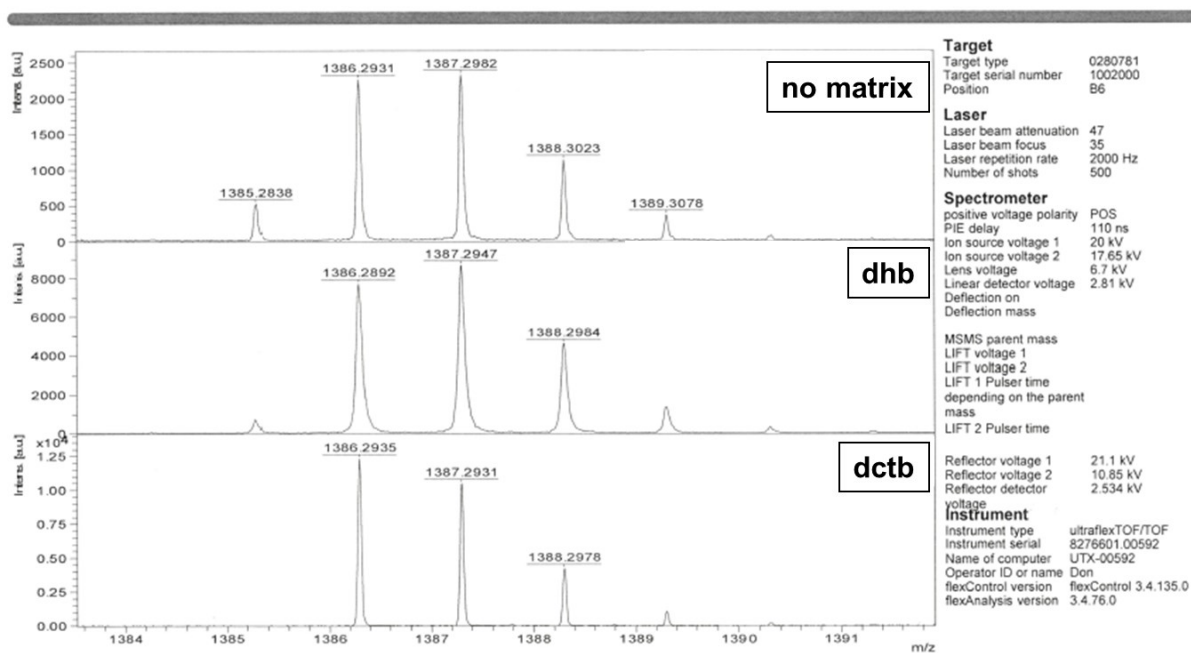

Figure S43. MS/HRMS (MALDI) of I-PDI-I.

$^1\text{H}$  NMR (601 MHz,  $\text{CD}_2\text{Cl}_2$ , rt)

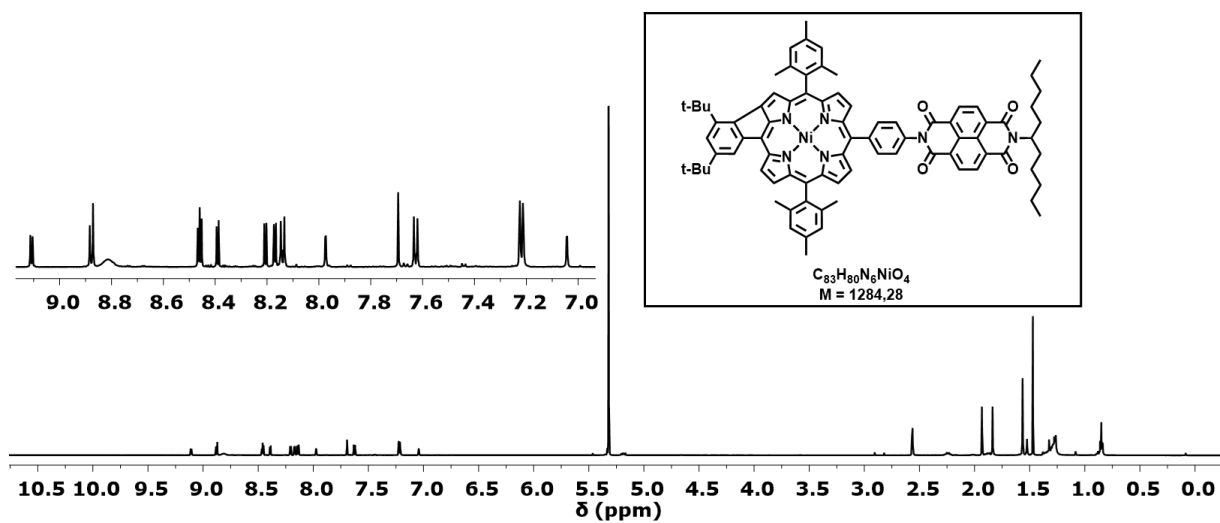

$^{13}\text{C}$  NMR - DEPTQ135 (151 MHz,  $\text{CD}_2\text{Cl}_2$ , rt)

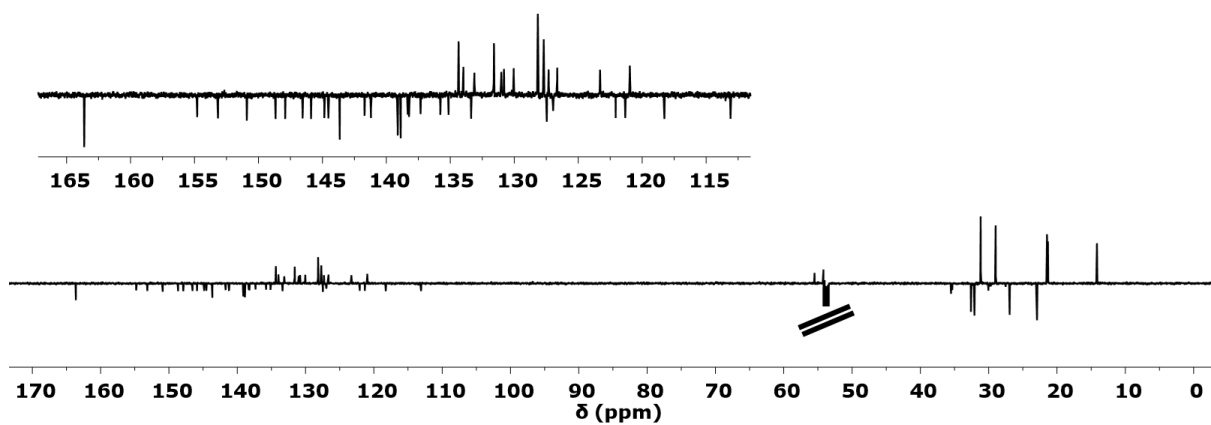

Figure S44.  $^1\text{H}$  and  $^{13}\text{C}$  NMR (DEPTQ135) of Ph-NDI.

$^1\text{H}$ - $^1\text{H}$  COSY (601 MHz,  $\text{CD}_2\text{Cl}_2$ , rt)

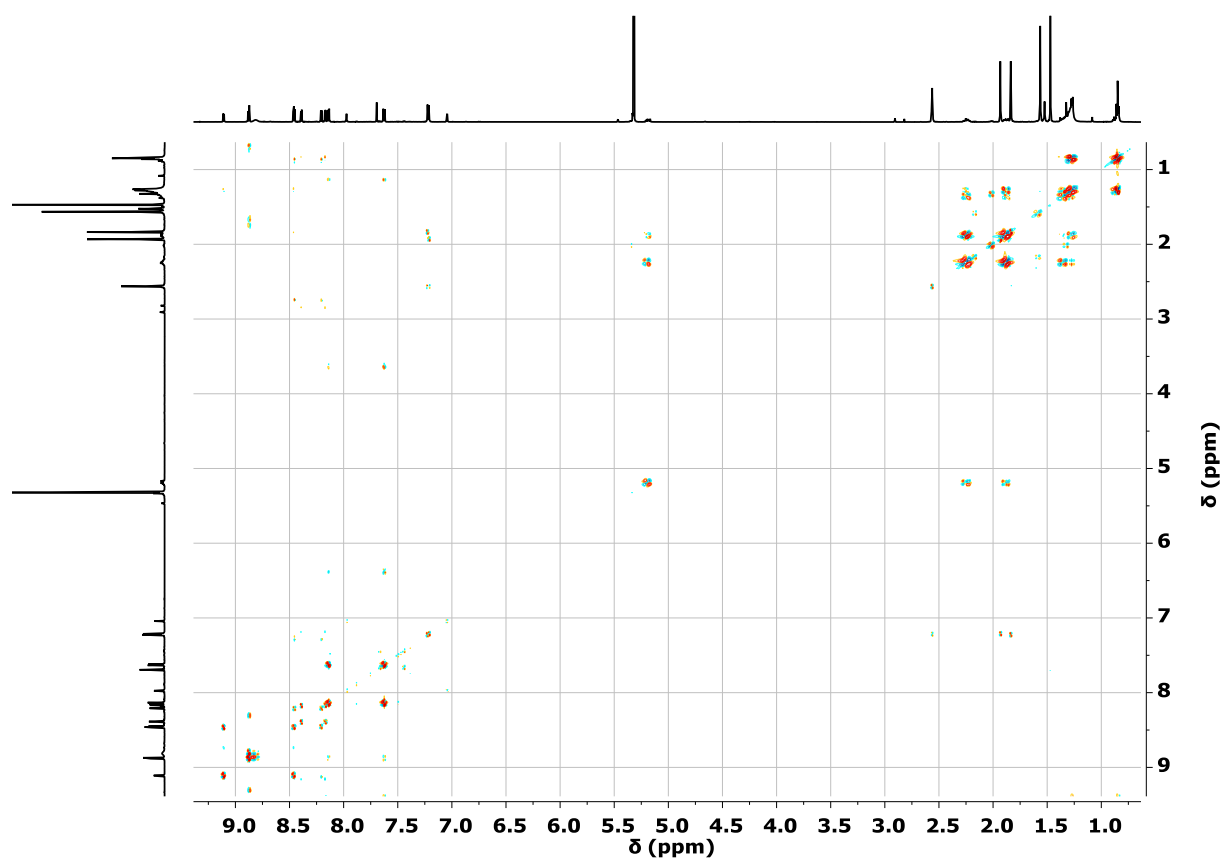

Figure S45.  $^1\text{H}$ - $^1\text{H}$  COSY of Ph-NDI.

$^1\text{H}$ - $^{13}\text{C}$  HSQC (601 MHz,  $\text{CD}_2\text{Cl}_2$ , rt)

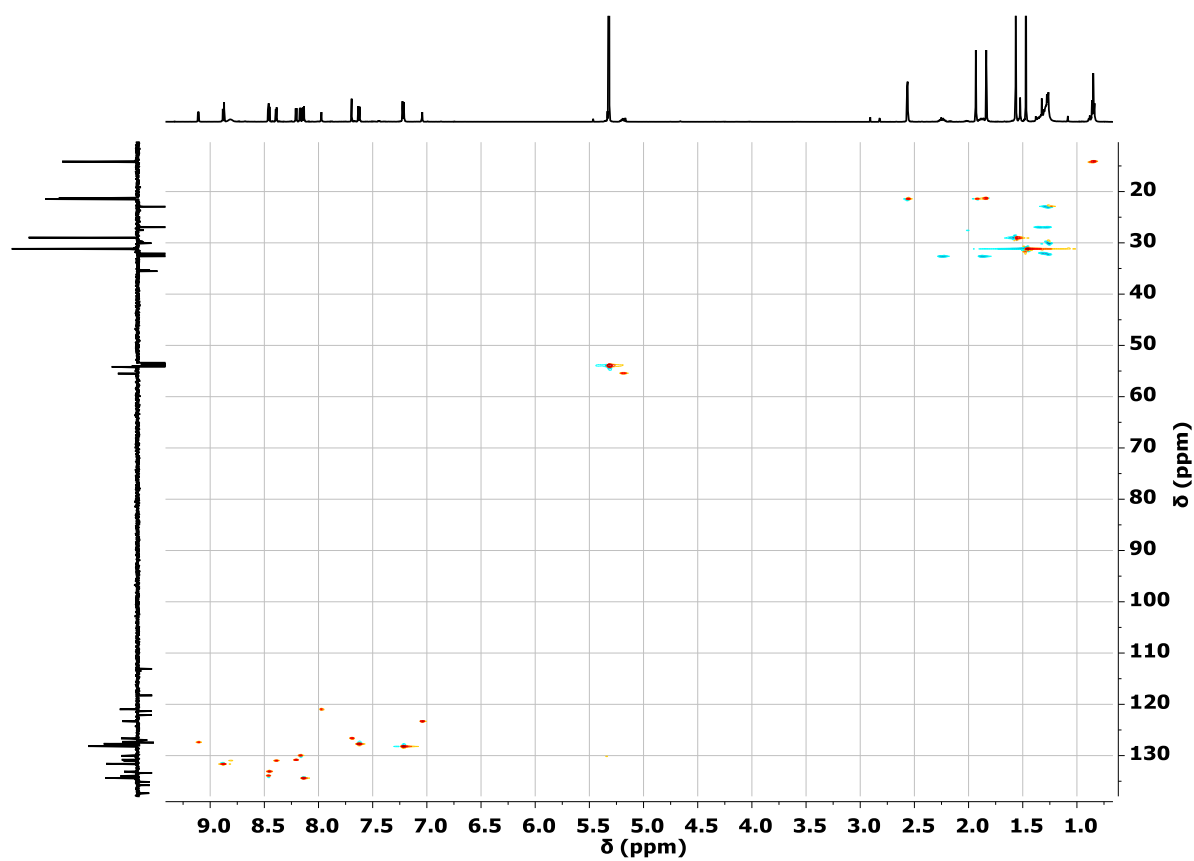

Figure S46.  $^1\text{H}$ - $^{13}\text{C}$  HSQC of Ph-NDI.

$^1\text{H}$ - $^{13}\text{C}$  HMBC (601 MHz,  $\text{CD}_2\text{Cl}_2$ , rt)

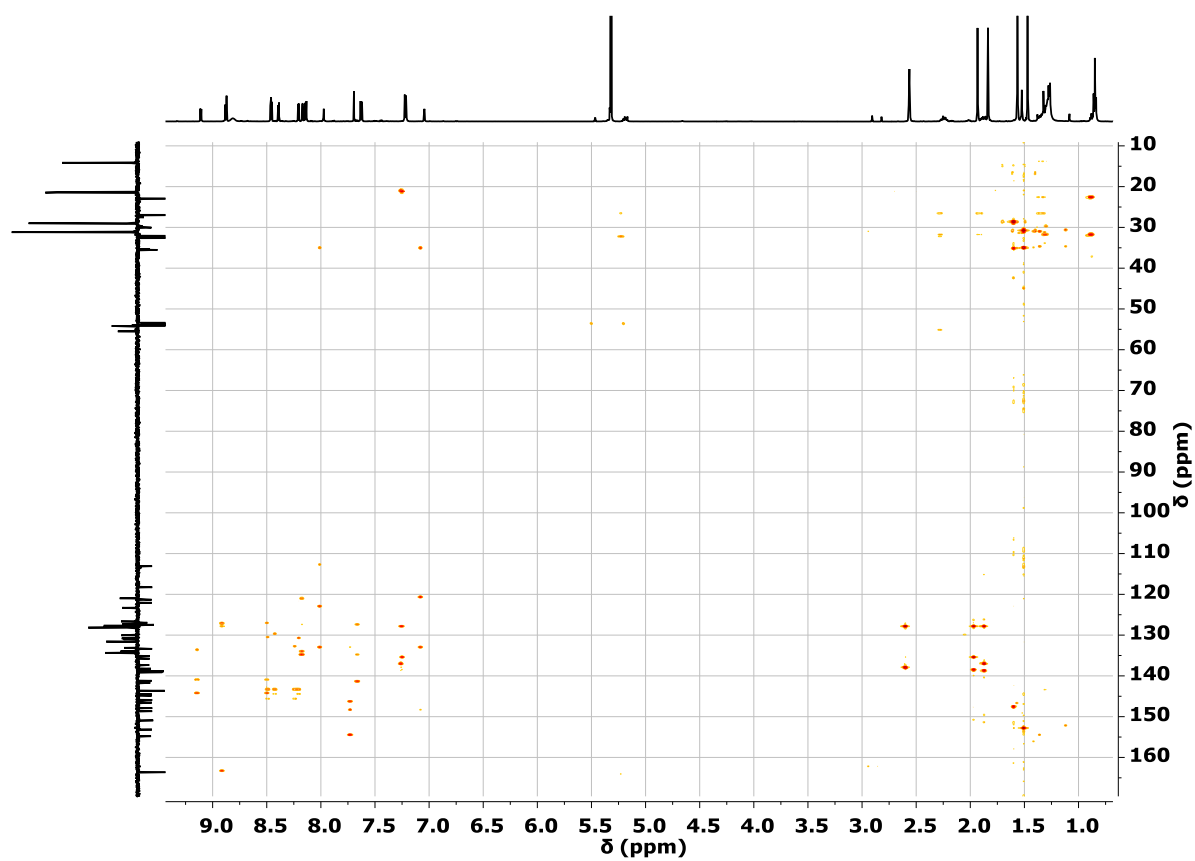

Figure S47.  $^1\text{H}$ - $^{13}\text{C}$  HMBC of Ph-NDI.

## MS (MALDI)

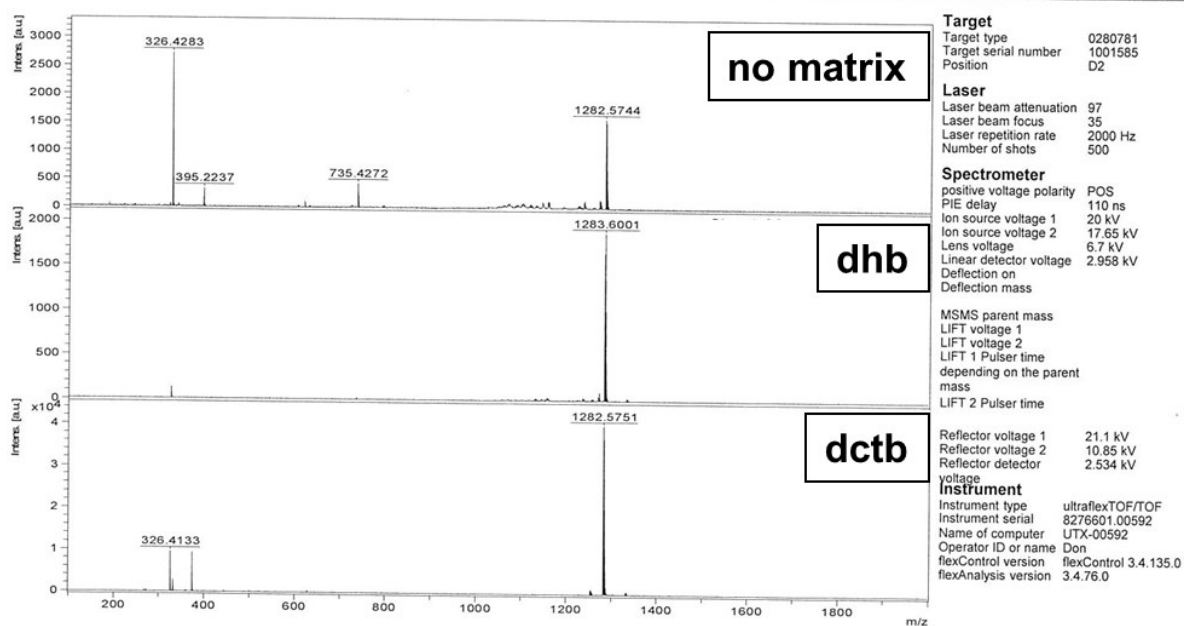

## HRMS (MALDI)

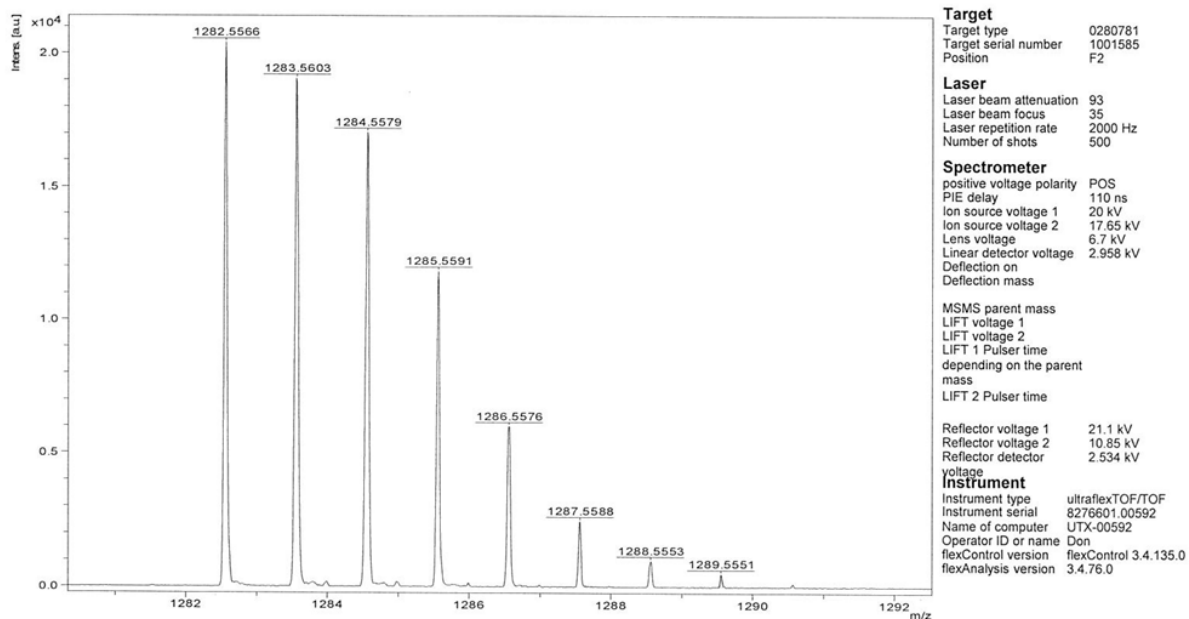

### SmartFormula

| Formula                 | Mass       | Error  | mSigma  | DbIEq | N rule | Electron Configuration |
|-------------------------|------------|--------|---------|-------|--------|------------------------|
| C 83 H 80<br>N 6 Ni O 4 | 1,282.5589 | 1.8171 | 24.7208 | 47.00 | ok     | odd                    |

Figure S48. MS/HRMS (MALDI) of Ph-NDI.



$^1\text{H}$  NMR (601 MHz,  $\text{CD}_2\text{Cl}_2$ , rt)

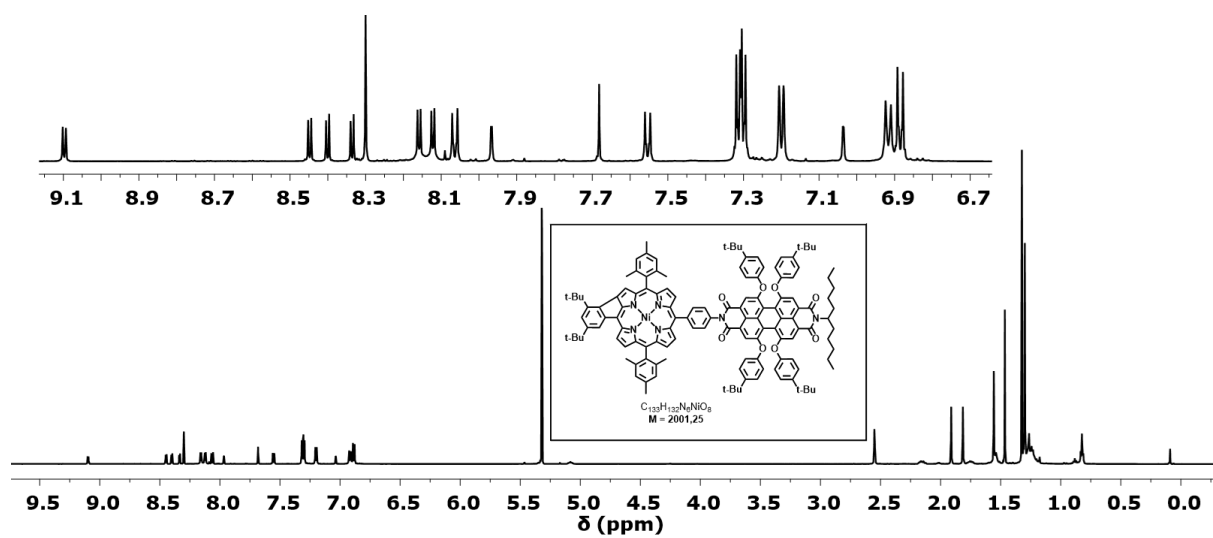

$^{13}\text{C}$  NMR - DEPTQ135 (151 MHz,  $\text{CD}_2\text{Cl}_2$ , rt)

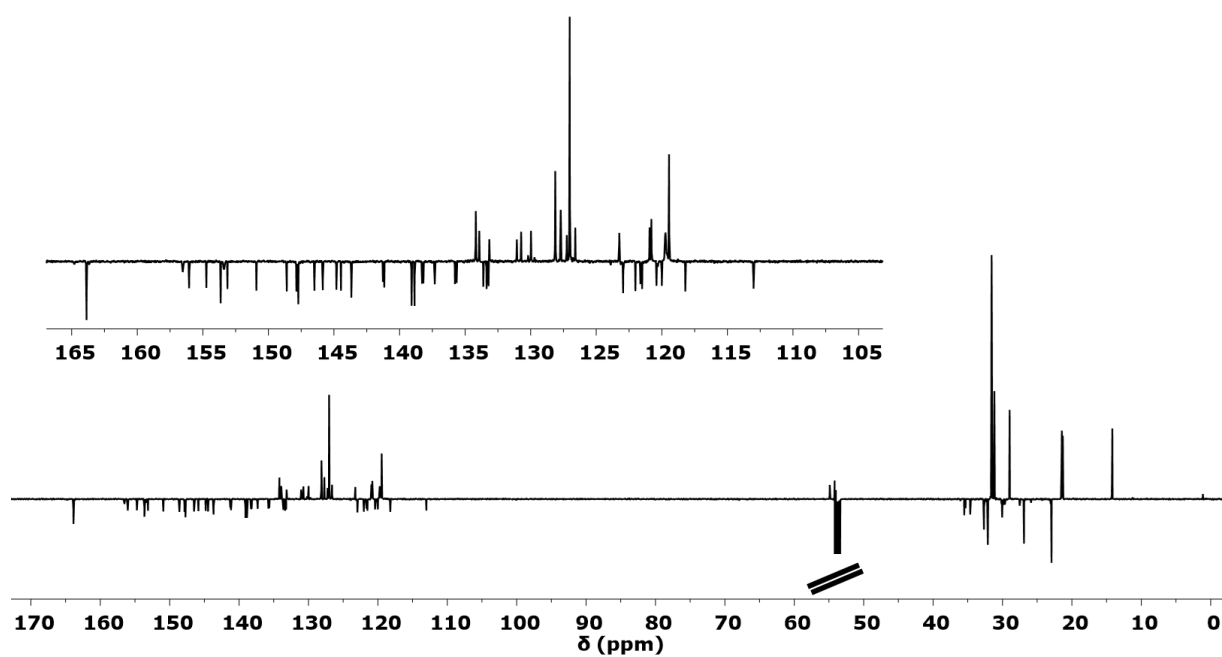

Figure S49.  $^1\text{H}$  and  $^{13}\text{C}$  NMR (DEPTQ135) of Ph-PDI.

$^1\text{H}$ - $^1\text{H}$  COSY (601 MHz,  $\text{CD}_2\text{Cl}_2$ , rt)

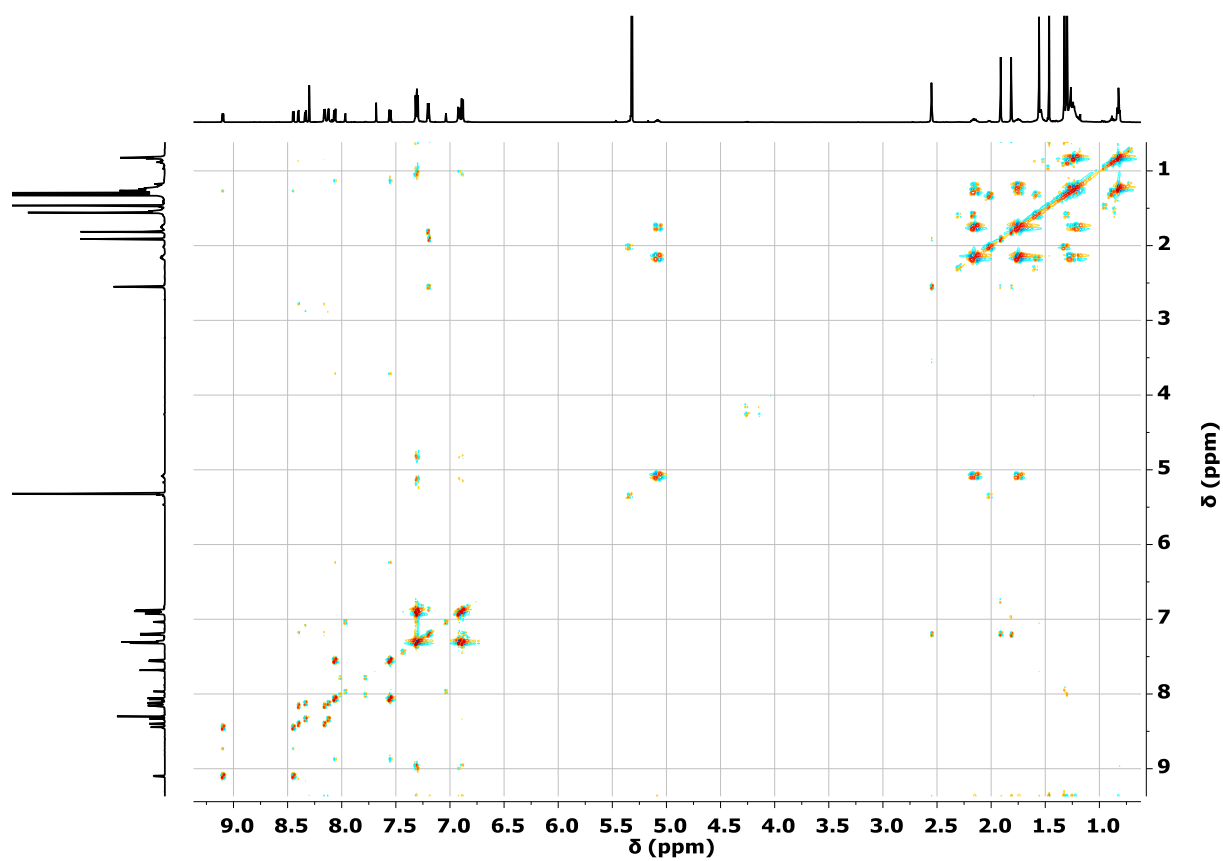

Figure S50.  $^1\text{H}$ - $^1\text{H}$  COSY of Ph-PDI.

$^1\text{H}$ - $^{13}\text{C}$  HSQC (601 MHz,  $\text{CD}_2\text{Cl}_2$ , rt)

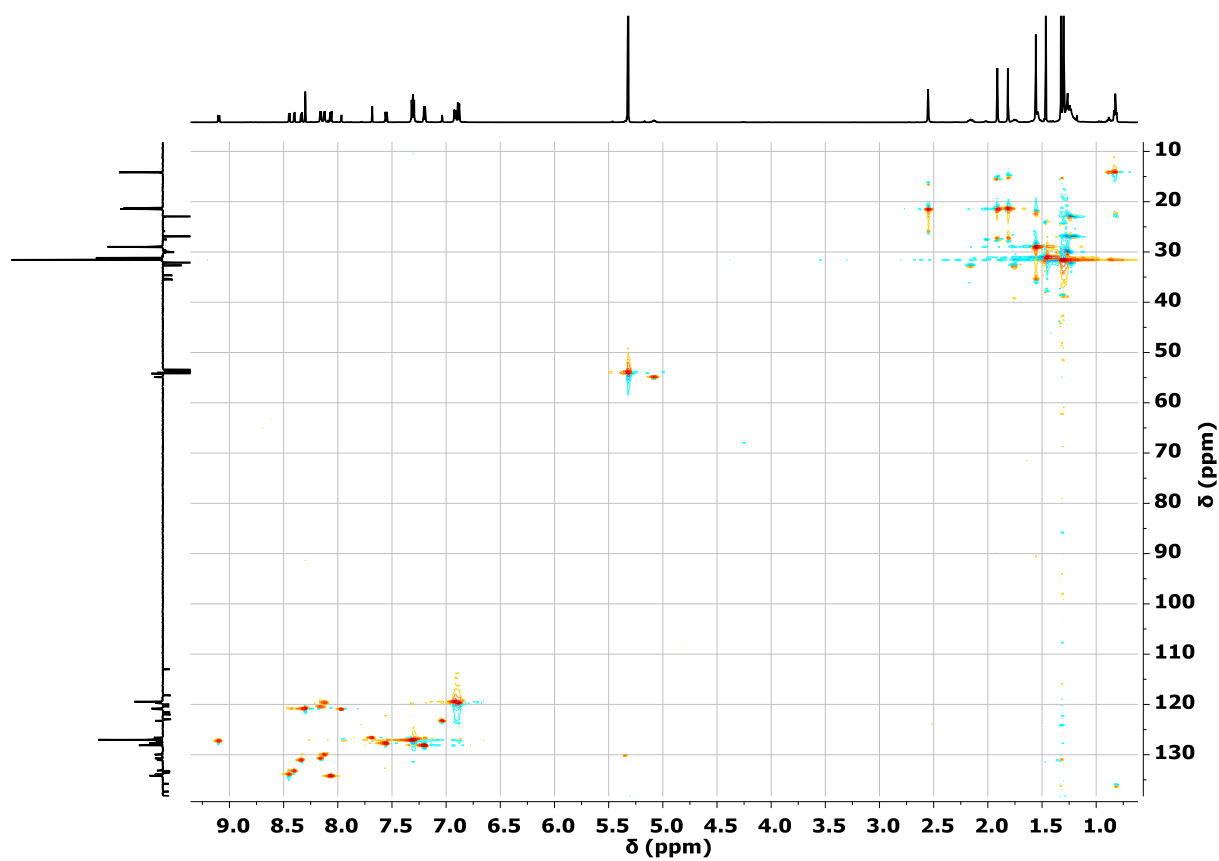

Figure S51.  $^1\text{H}$ - $^{13}\text{C}$  HSQC of Ph-PDI.

$^1\text{H}$ - $^{13}\text{C}$  HMBC (601 MHz,  $\text{CD}_2\text{Cl}_2$ , rt)

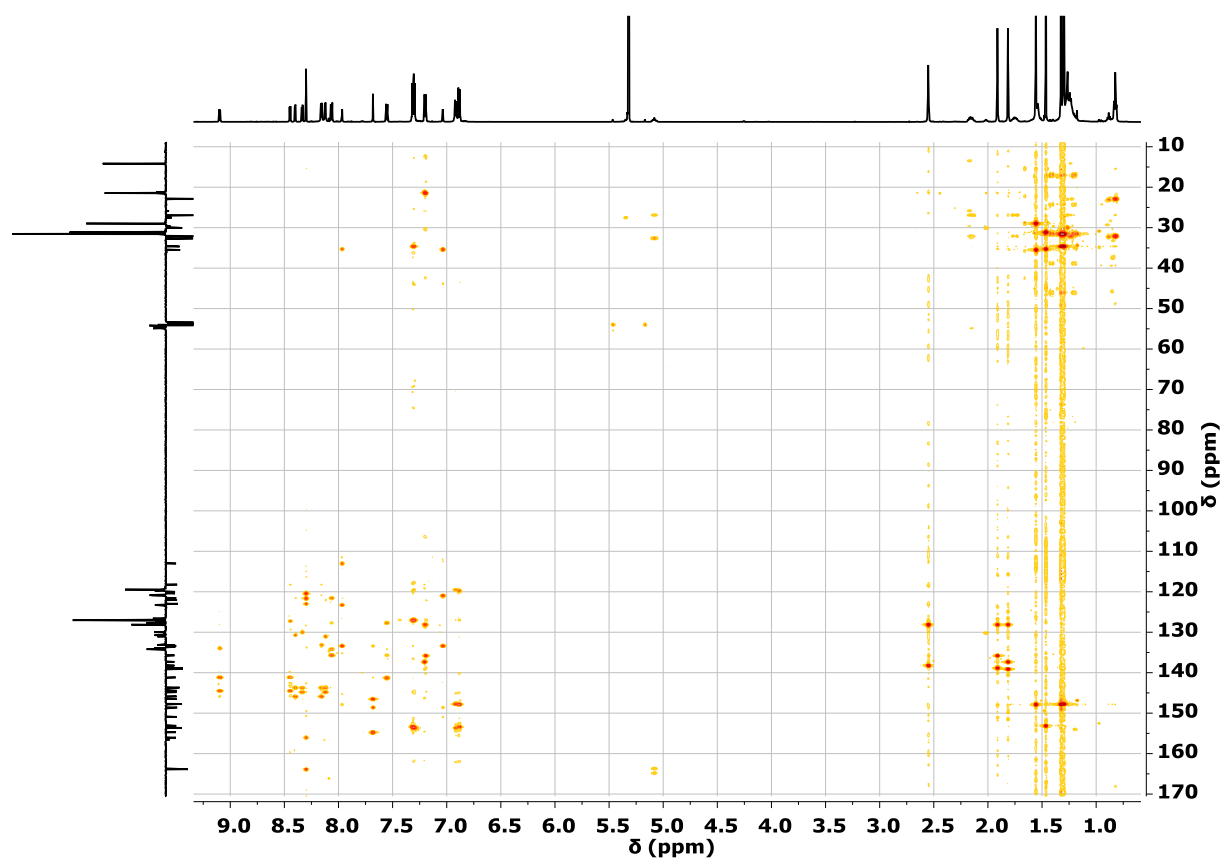

Figure S52.  $^1\text{H}$ - $^{13}\text{C}$  HMBC of Ph-PDI.

## MS (MALDI)

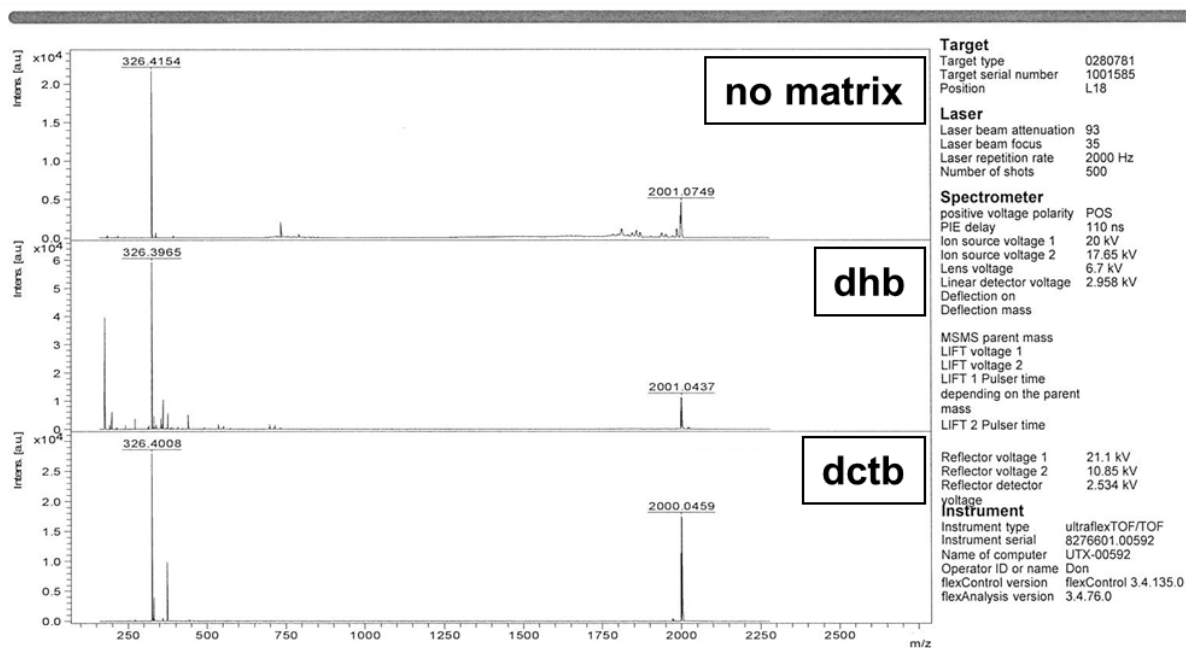

## HRMS (MALDI)

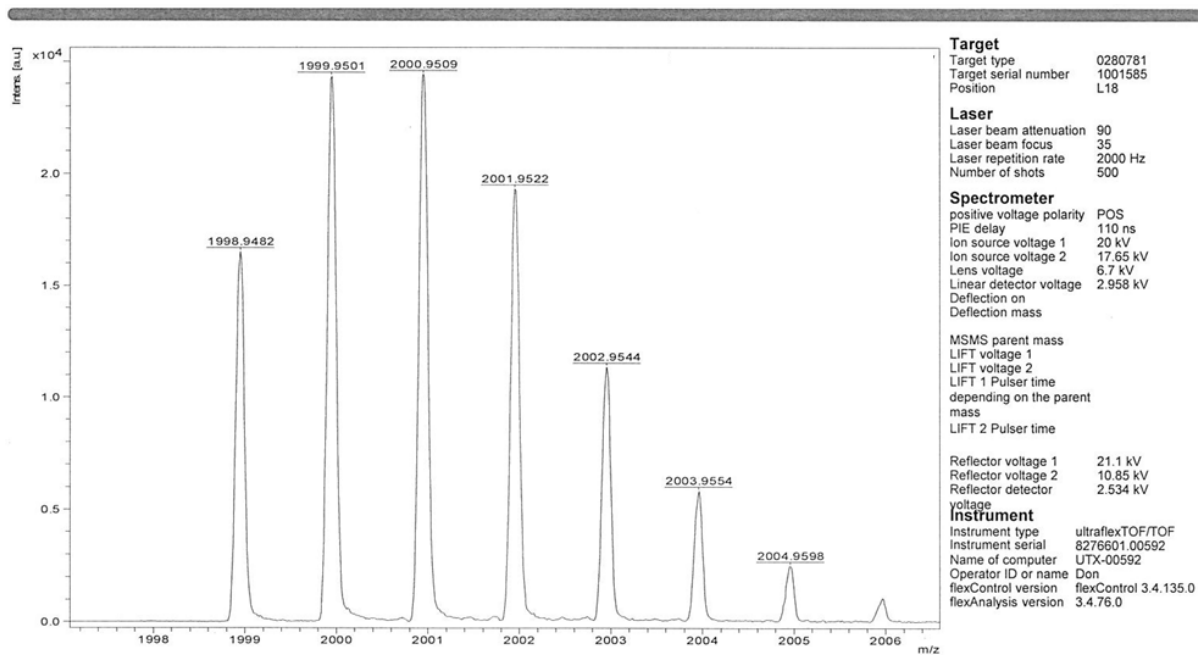

## SmartFormula

| Formula                      | Mass       | Error  | mSigma  | DblEq | N rule | Electron Configuration |
|------------------------------|------------|--------|---------|-------|--------|------------------------|
| C 133 H<br>132 N 6 Ni<br>O 8 | 1,998.9455 | 1.3711 | 22.1727 | 71.00 | ok     | odd                    |

Figure S53. MS/HRMS (MALDI) of Ph-PDI.

$^1\text{H}$  NMR (601 MHz,  $\text{CD}_2\text{Cl}_2$ , rt)

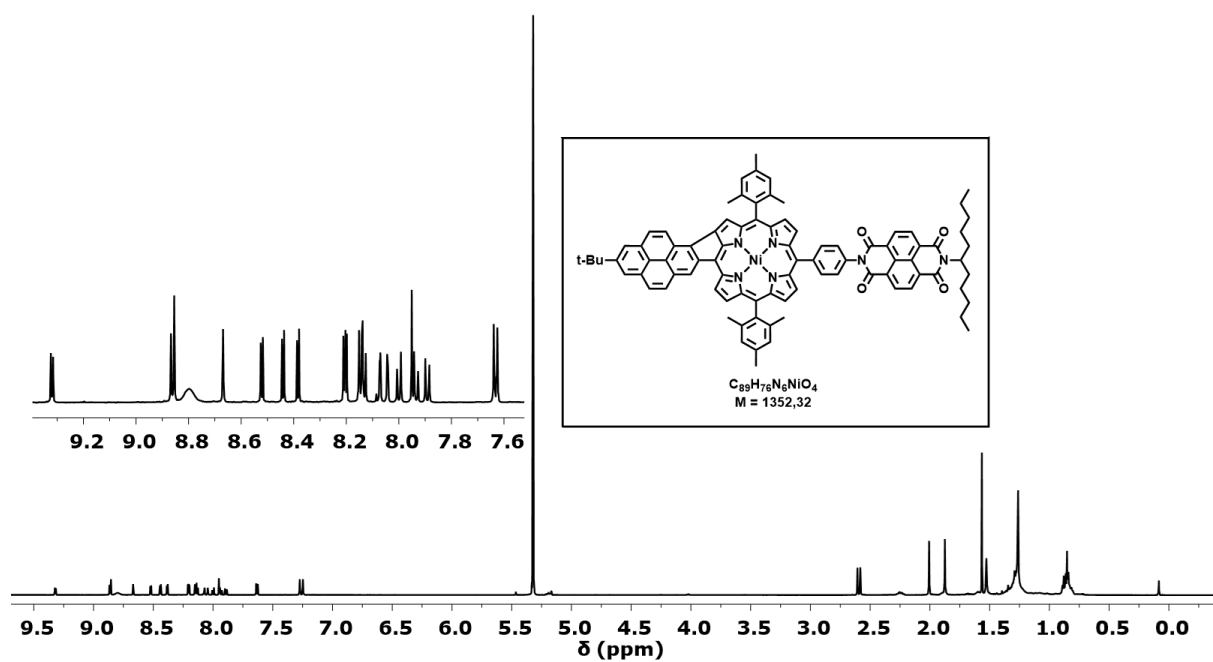

$^{13}\text{C}$  NMR - DEPTQ135 (151 MHz,  $\text{CD}_2\text{Cl}_2$ , rt)

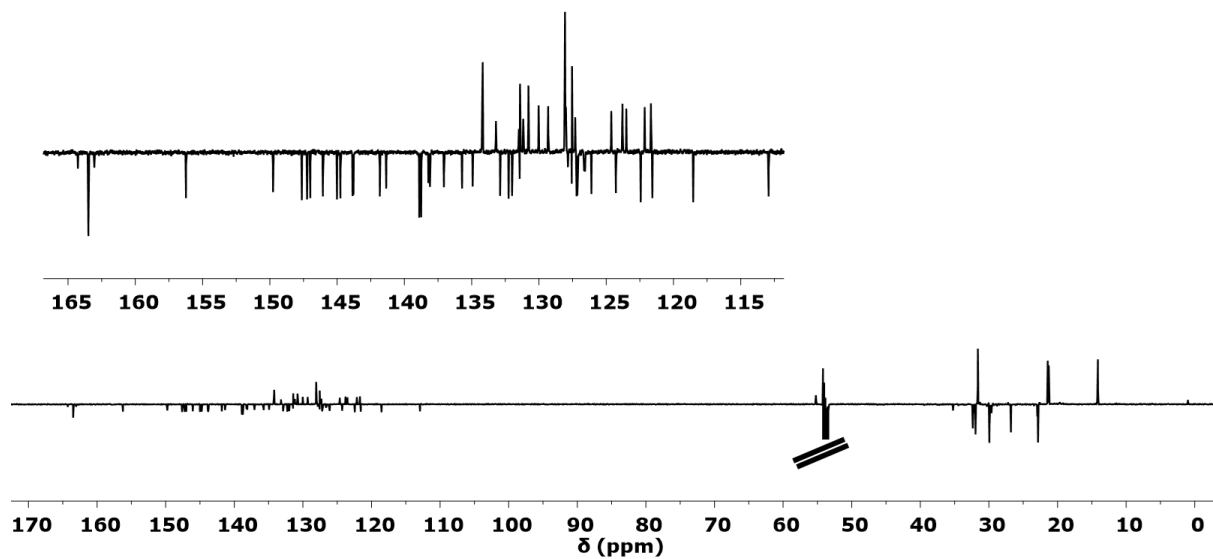

Figure S54.  $^1\text{H}$  and  $^{13}\text{C}$  NMR (DEPTQ135) of Pyr-NDI.

$^1\text{H}$ - $^1\text{H}$  COSY (601 MHz,  $\text{CD}_2\text{Cl}_2$ , rt)

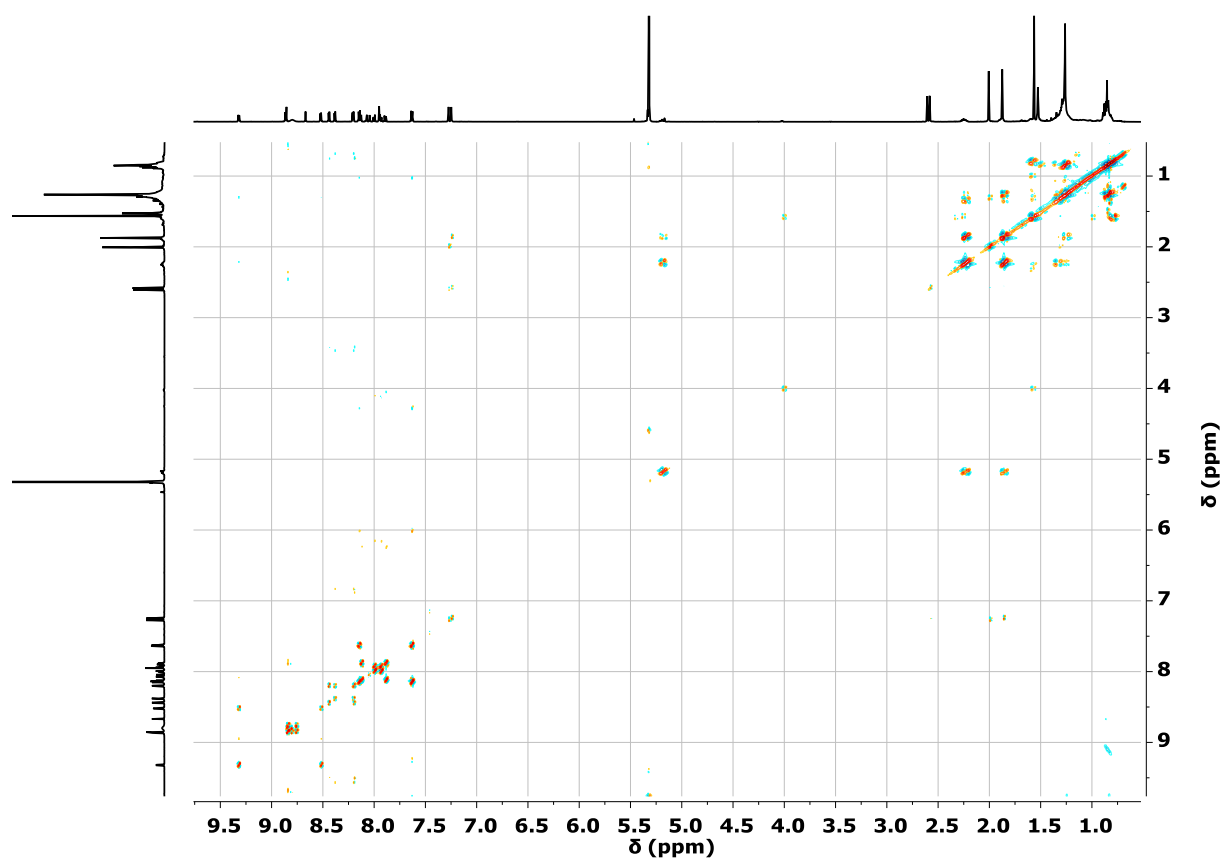

Figure S55.  $^1\text{H}$ - $^1\text{H}$  COSY of Pyr-NDI.

$^1\text{H}$ - $^{13}\text{C}$  HSQC (601 MHz,  $\text{CD}_2\text{Cl}_2$ , rt)

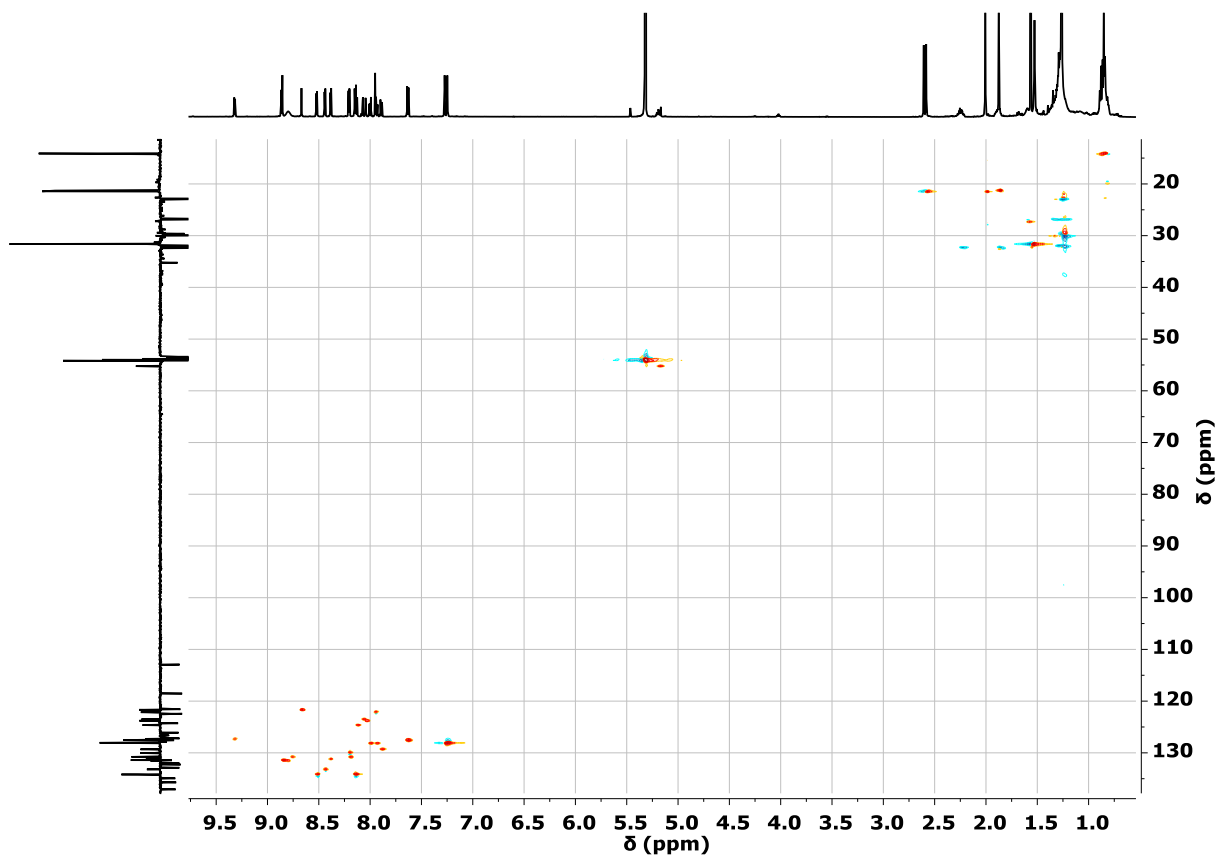

Figure S56.  $^1\text{H}$ - $^{13}\text{C}$  HSQC of Pyr-NDI.



$^1\text{H}$ - $^{13}\text{C}$  HMBC (601 MHz,  $\text{CD}_2\text{Cl}_2$ , rt)

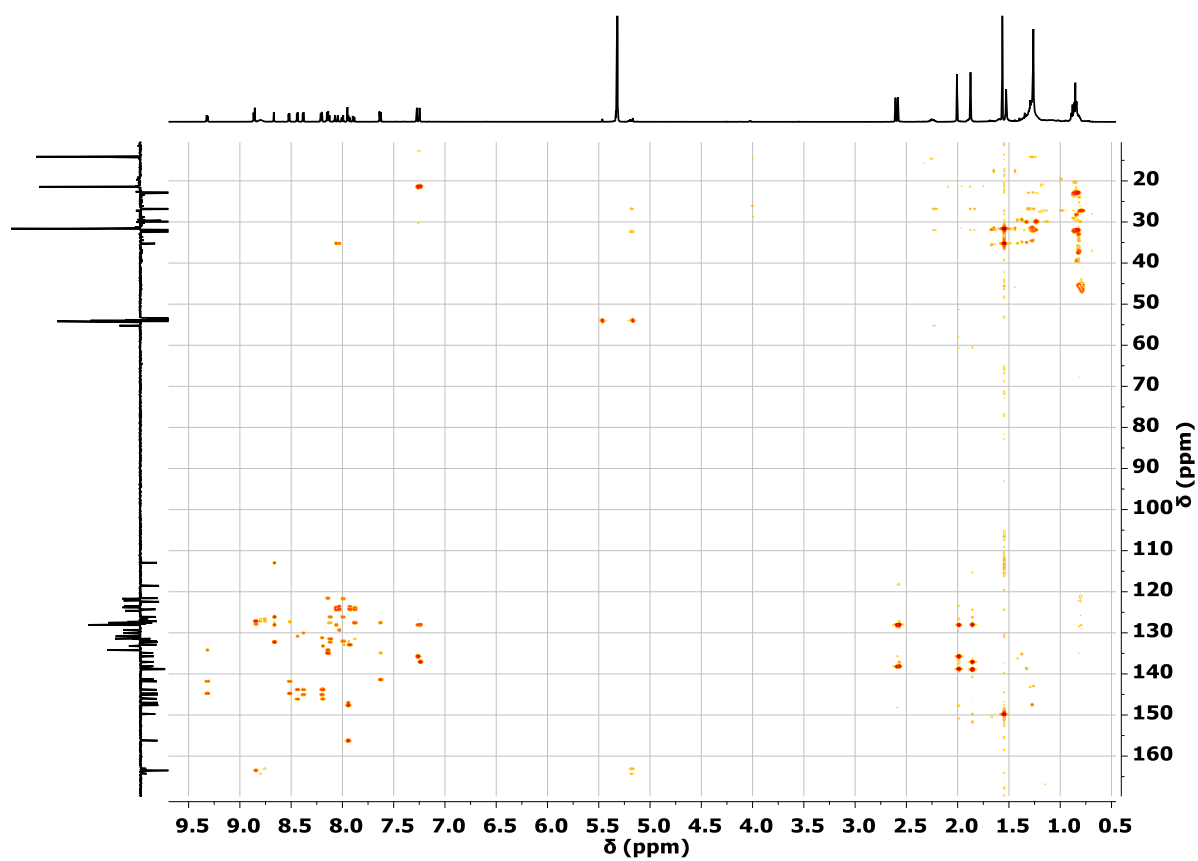

Figure S57.  $^1\text{H}$ - $^{13}\text{C}$  HMBC of Pyr-NDI.

$^1\text{H}$ - $^1\text{H}$  ROESY (601 MHz,  $\text{CD}_2\text{Cl}_2$ , rt)

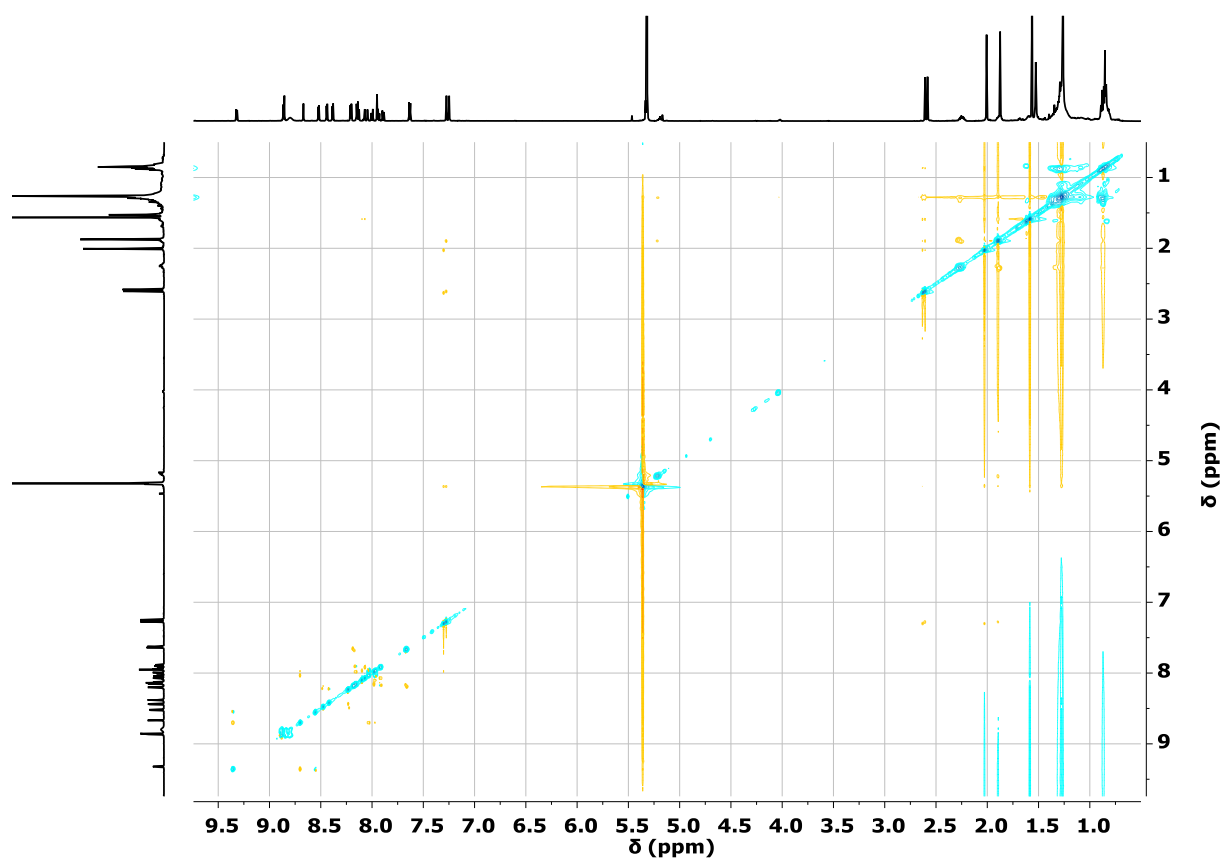

Figure S58.  $^1\text{H}$ - $^1\text{H}$  ROESY of Pyr-NDI.

## MS (MALDI)

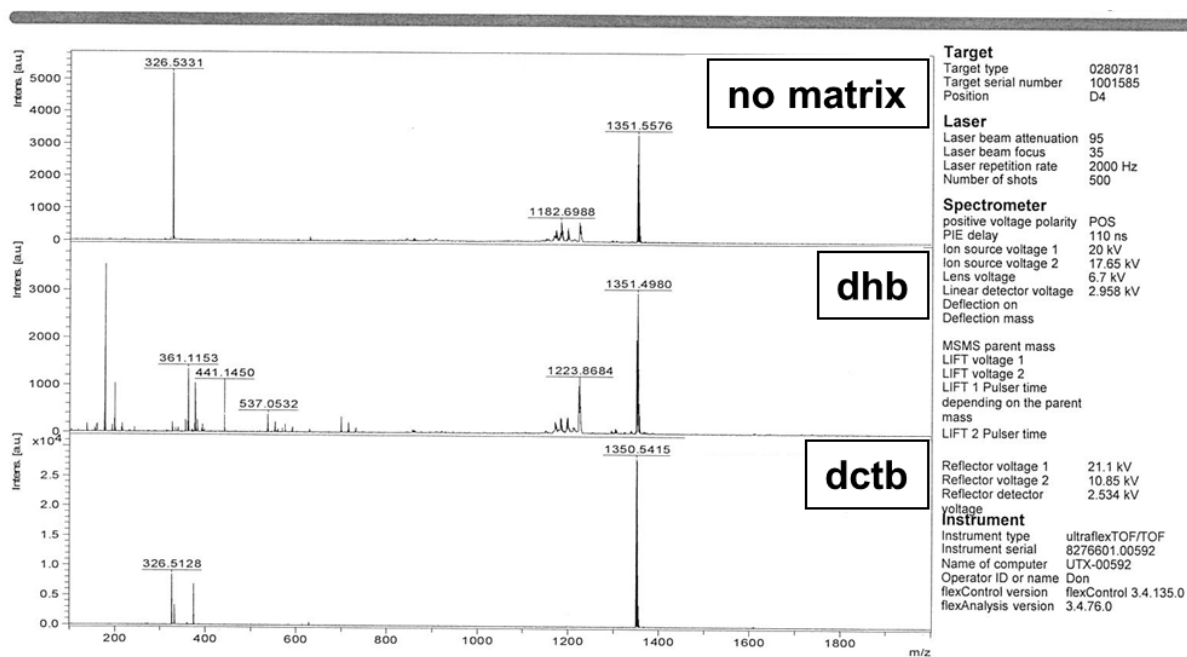

## HRMS (MALDI)

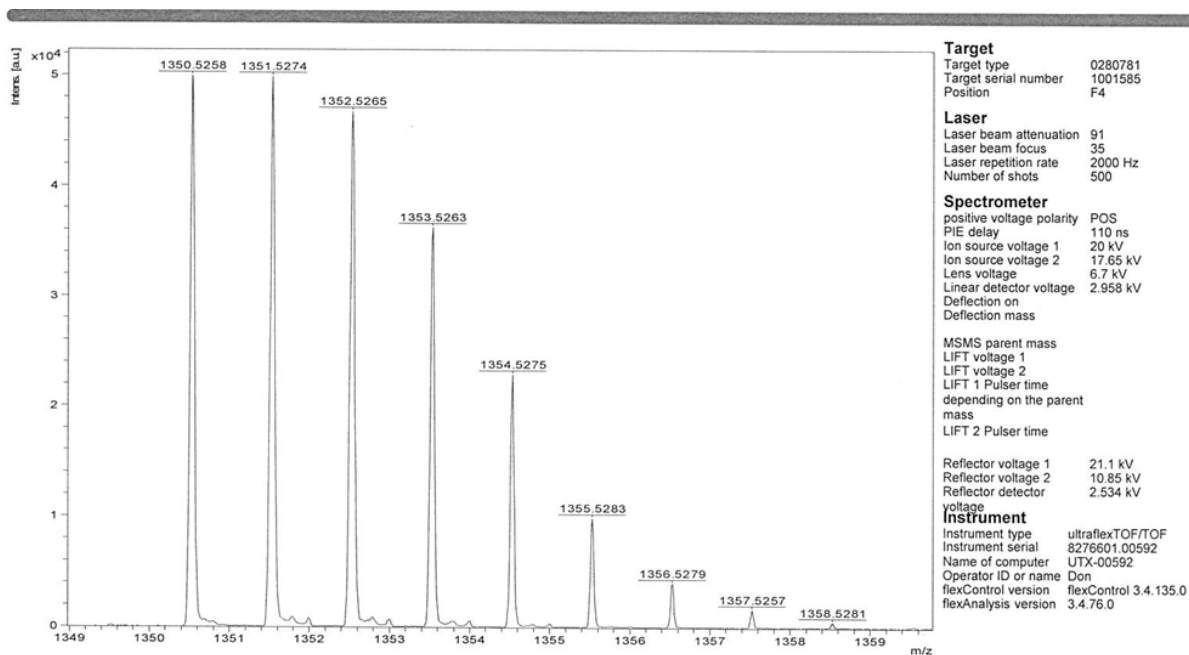

### SmartFormula

| Formula                                                            | Mass       | Error  | mSigma  | DblEq | N rule | Electron Configuration |
|--------------------------------------------------------------------|------------|--------|---------|-------|--------|------------------------|
| C <sub>89</sub> H <sub>76</sub><br>N <sub>6</sub> NiO <sub>4</sub> | 1,350.5276 | 1.3678 | 79.0430 | 55.00 | ok     | odd                    |

Figure S59. MS/HRMS (MALDI) of Pyr-NDI.

$^1\text{H}$  NMR (601 MHz,  $\text{CD}_2\text{Cl}_2/\text{CS}_2$ , rt)

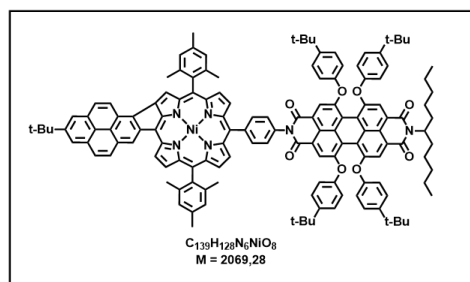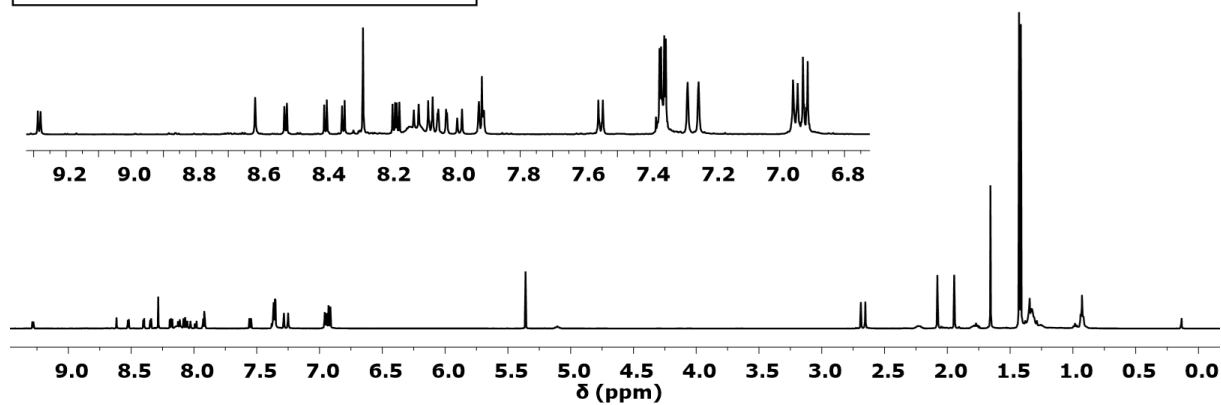

$^{13}\text{C}$  NMR - DEPTQ135 (151 MHz,  $\text{CD}_2\text{Cl}_2/\text{CS}_2$ , rt)

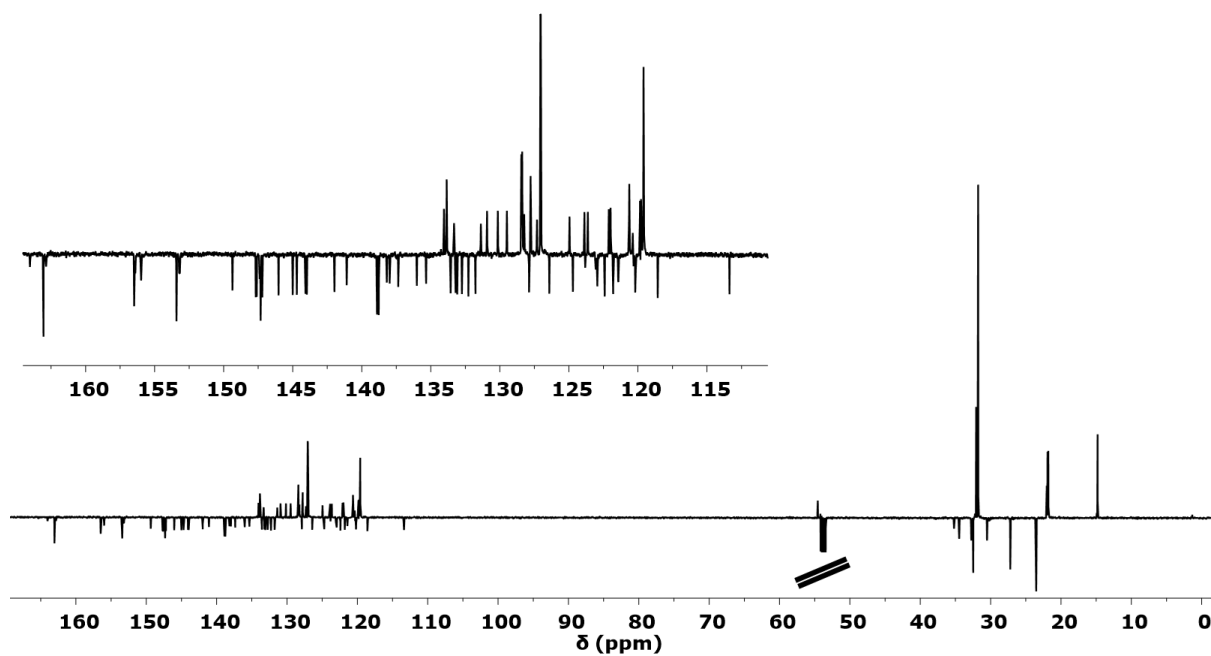

Figure S60.  $^1\text{H}$  and  $^{13}\text{C}$  NMR (DEPTQ135) of Pyr-PDI.

$^1\text{H}$ - $^1\text{H}$  COSY (601 MHz,  $\text{CD}_2\text{Cl}_2/\text{CS}_2$ , rt)

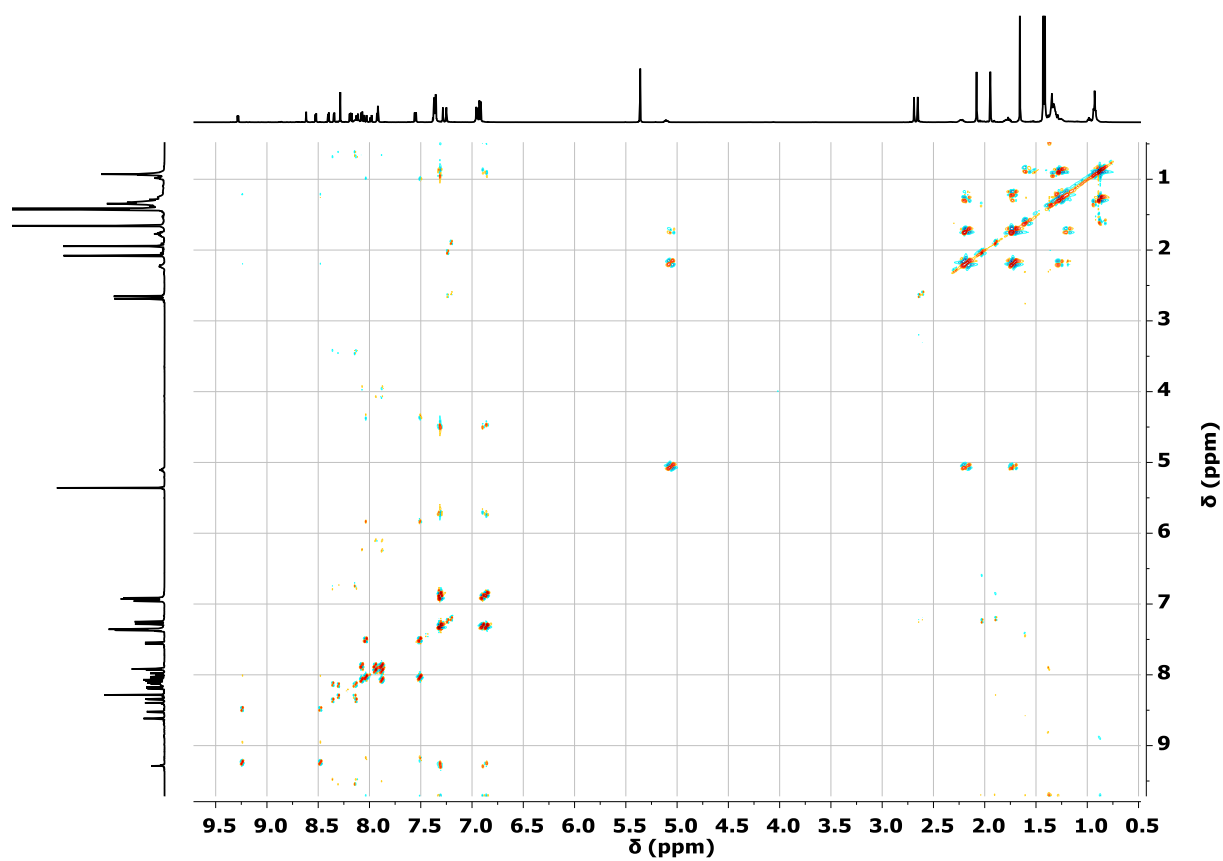

**Figure S61.**  $^1\text{H}$ - $^1\text{H}$  COSY of Pyr-PDI.

$^1\text{H}$ - $^{13}\text{C}$  HSQC (601 MHz,  $\text{CD}_2\text{Cl}_2/\text{CS}_2$ , rt)

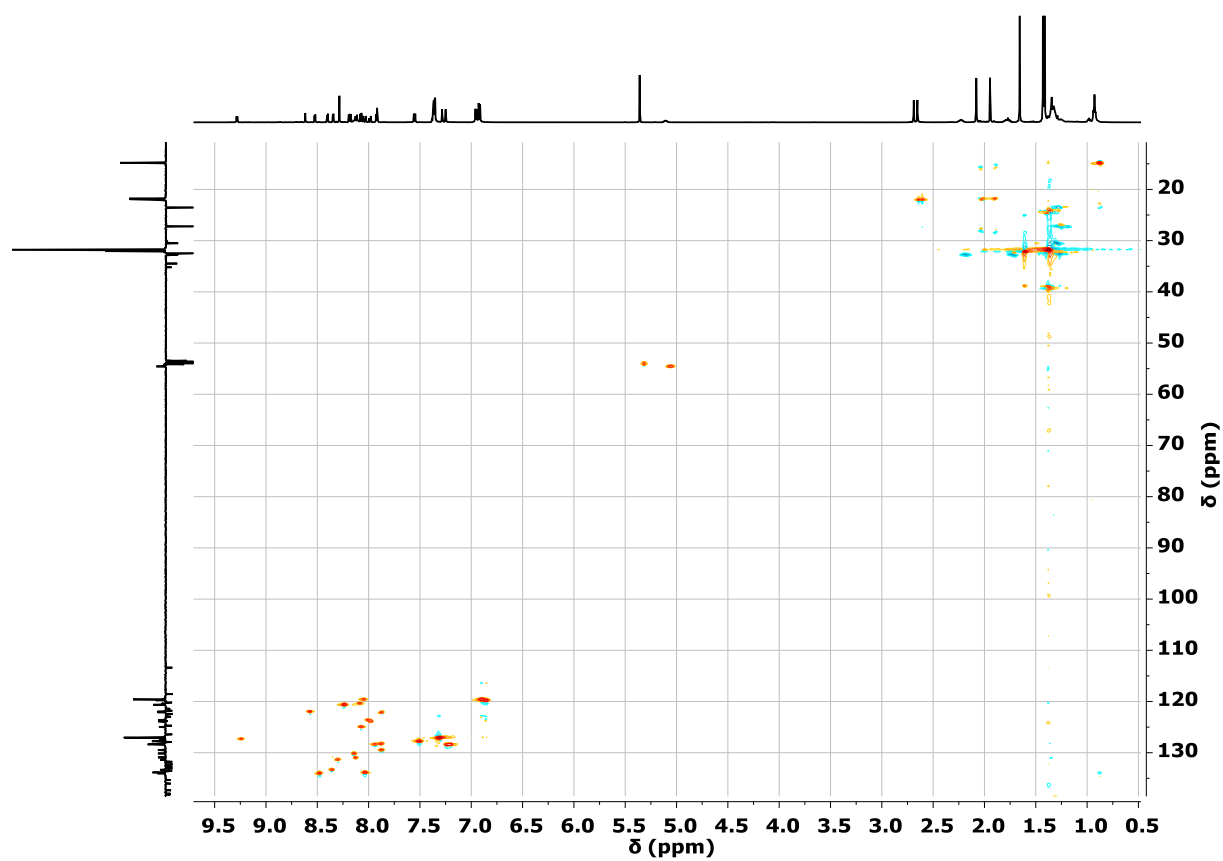

Figure S62.  $^1\text{H}$ - $^{13}\text{C}$  HSQC of Pyr-PDI.

$^1\text{H}$ - $^{13}\text{C}$  HMBC (601 MHz,  $\text{CD}_2\text{Cl}_2/\text{CS}_2$ , rt)

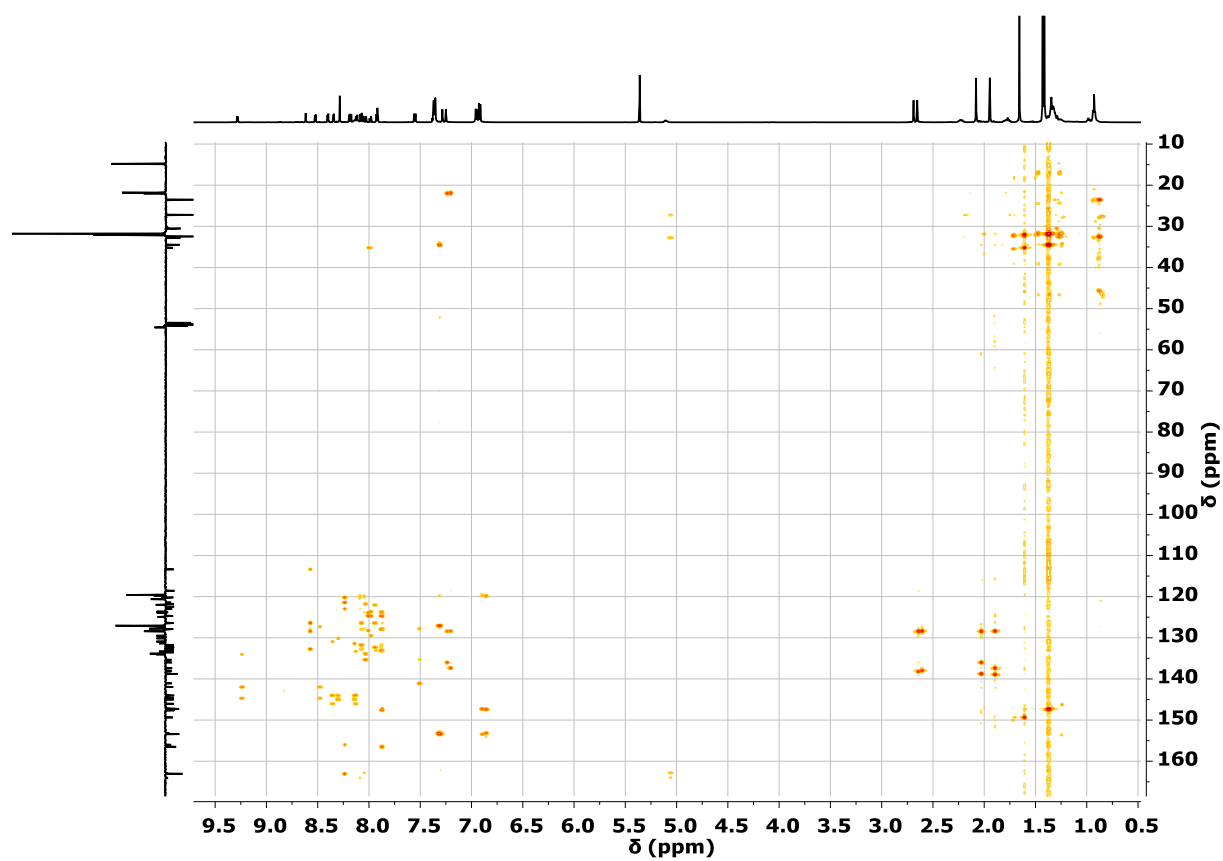

Figure S63.  $^1\text{H}$ - $^{13}\text{C}$  HMBC of Pyr-PDI.

$^1\text{H}$ - $^1\text{H}$  ROESY (601 MHz,  $\text{CD}_2\text{Cl}_2/\text{CS}_2$ , rt)

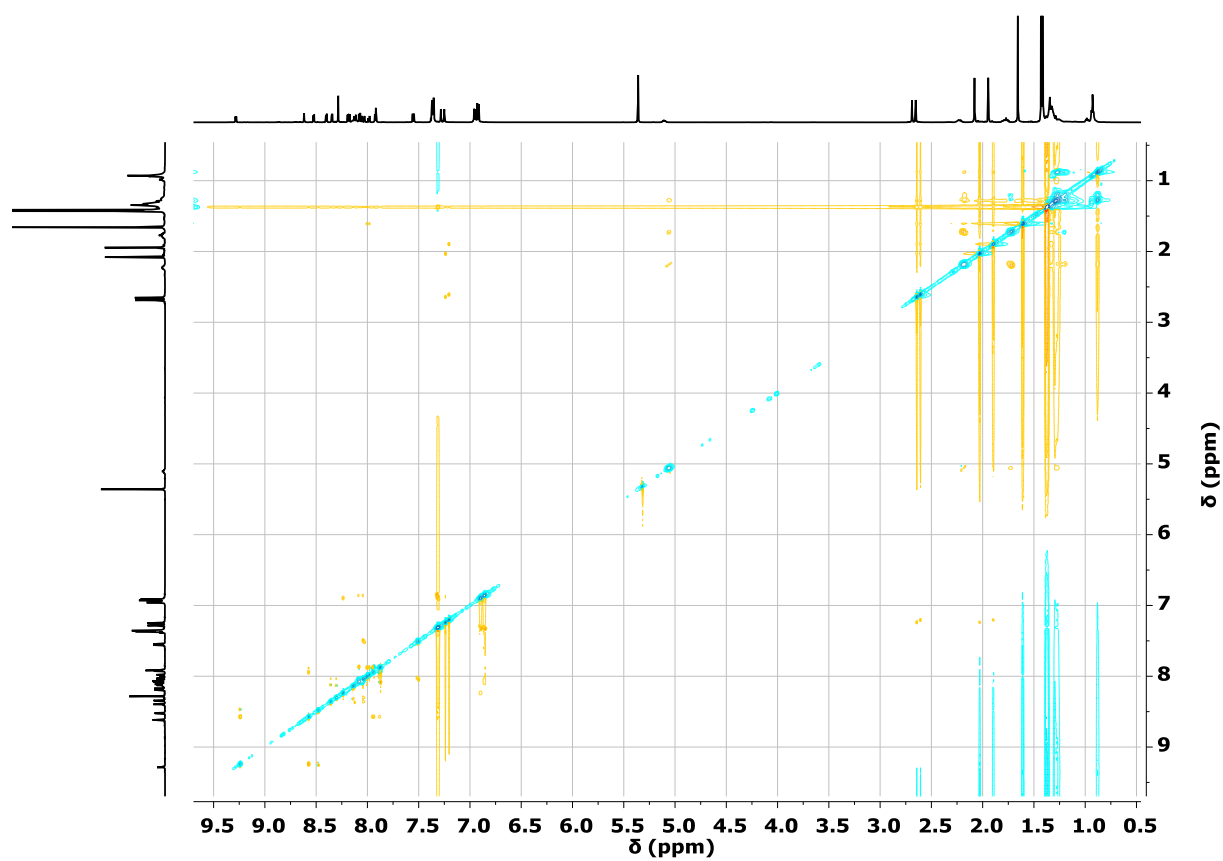

Figure S64.  $^1\text{H}$ - $^1\text{H}$  ROESY of Pyr-PDI.



## MS (MALDI)

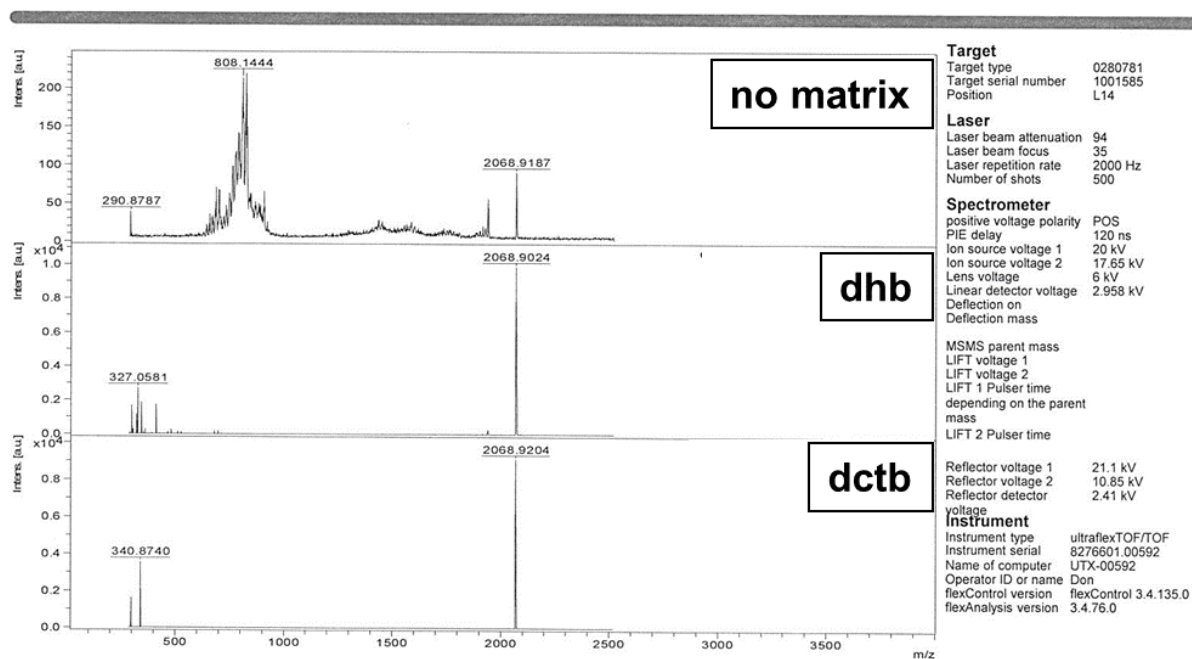

## HRMS (MALDI)

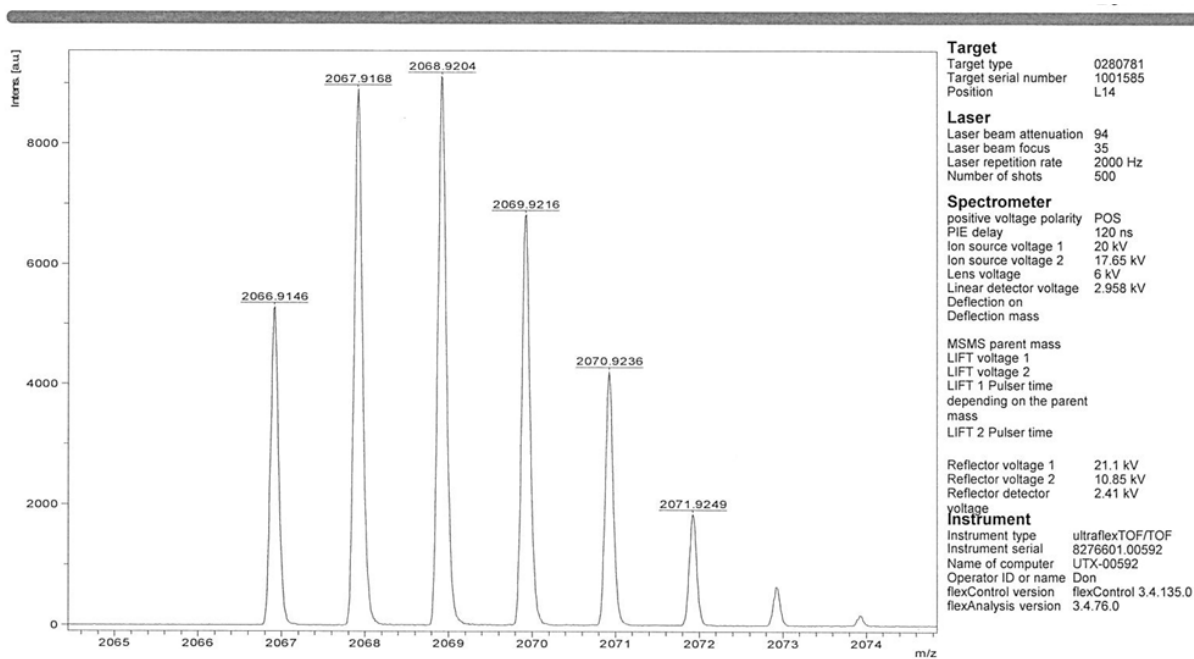

### SmartFormula

| Formula                      | Mass       | Error  | mSigma  | DbIEq | N rule | Electron Configuration |
|------------------------------|------------|--------|---------|-------|--------|------------------------|
| C 139 H<br>128 N 6 Ni<br>O 8 | 2,066.9142 | 0.2354 | 54.2301 | 79.00 | ok     | odd                    |

**Figure S65.** MS/HRMS (MALDI) of Pyr-PDI.

$^1\text{H}$  NMR (601 MHz,  $\text{CD}_2\text{Cl}_2$ , rt)

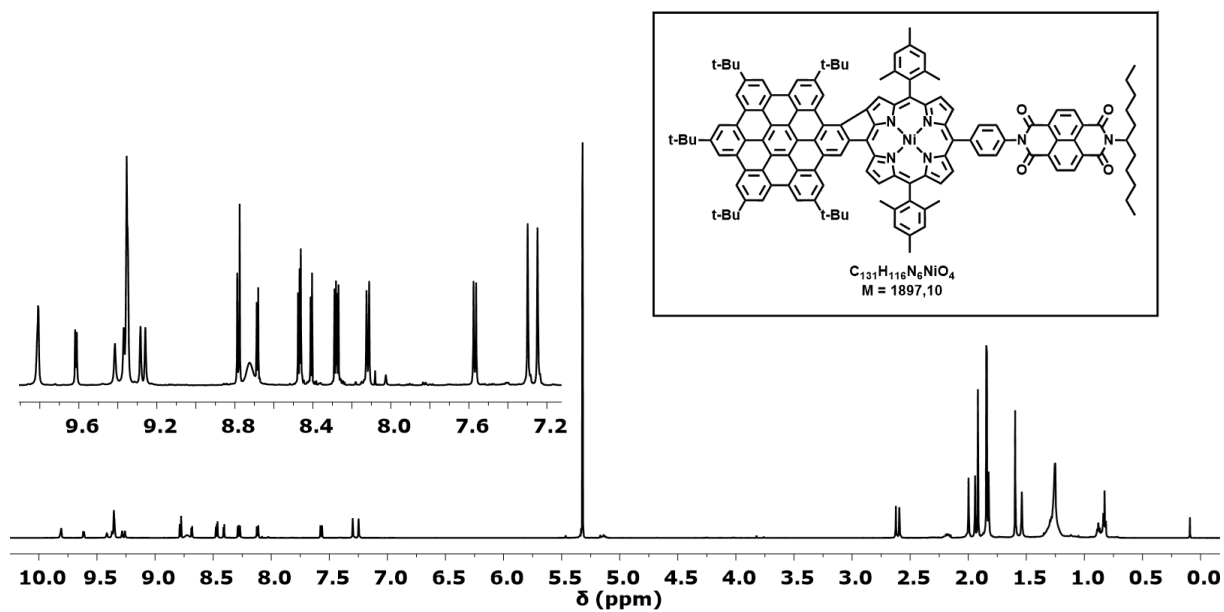

$^{13}\text{C}$  NMR - DEPTQ135 (151 MHz,  $\text{CD}_2\text{Cl}_2$ , rt)

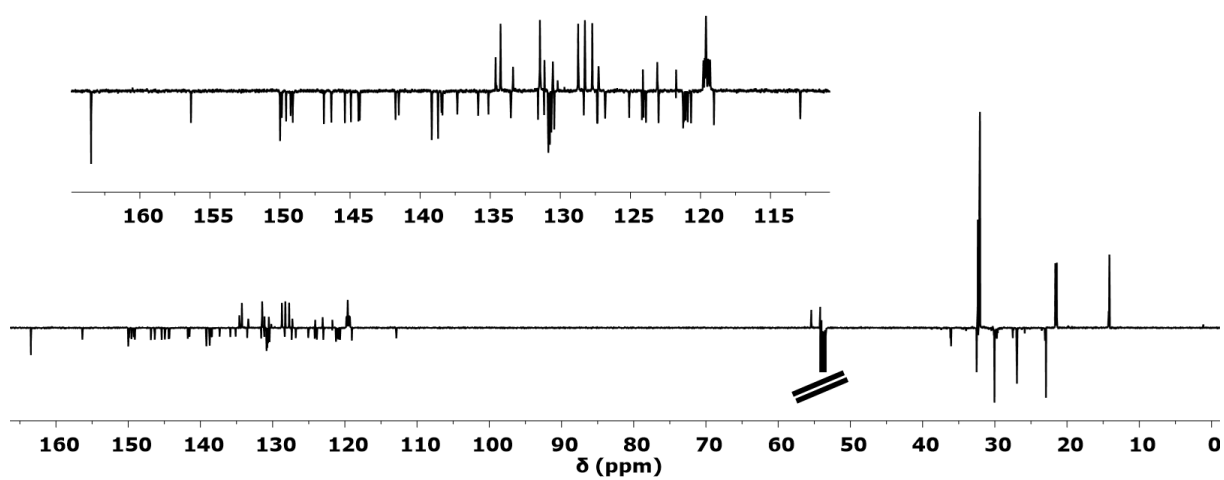

Figure S66.  $^1\text{H}$  and  $^{13}\text{C}$  NMR (DEPTQ135) of HBC-NDI.

$^1\text{H}$ - $^1\text{H}$  COSY (601 MHz,  $\text{CD}_2\text{Cl}_2$ , rt)

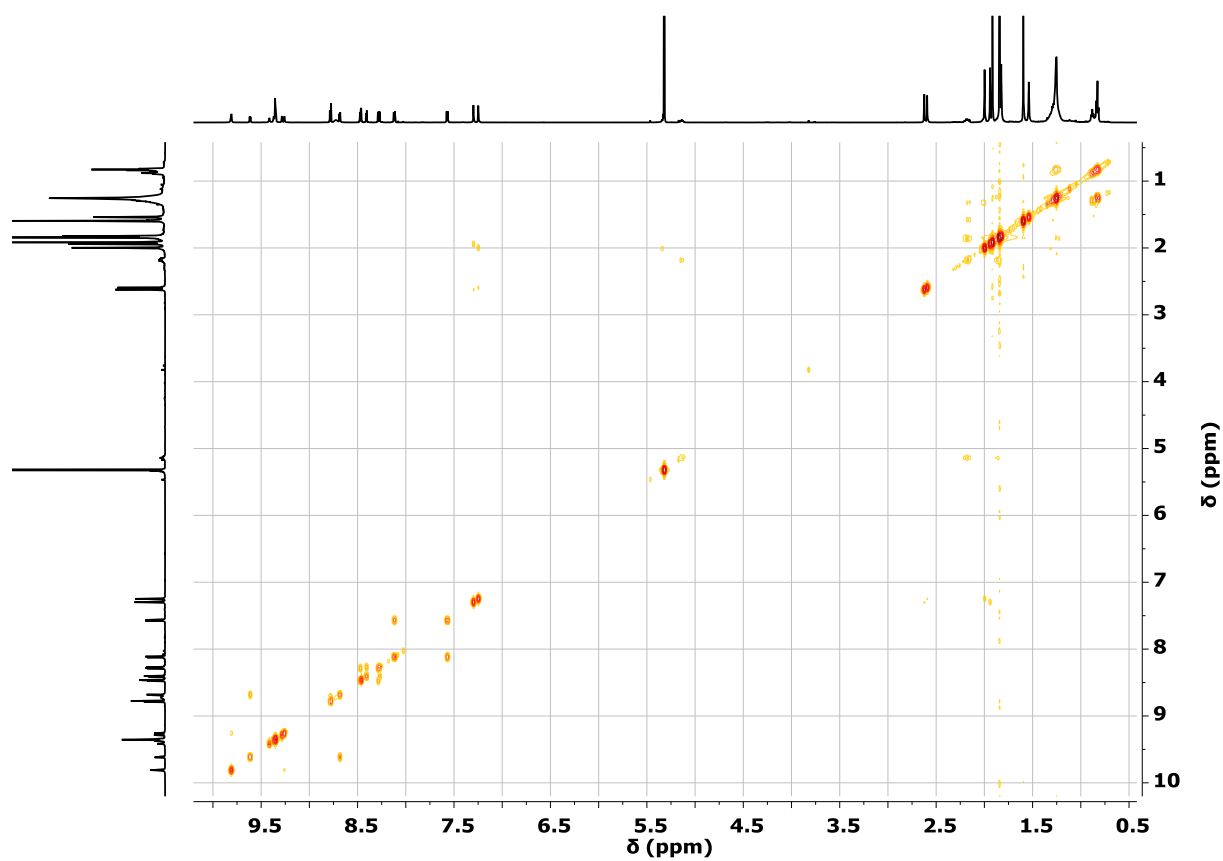

Figure S67.  $^1\text{H}$ - $^1\text{H}$  COSY of HBC-NDI.

$^1\text{H}$ - $^{13}\text{C}$  HSQC (601 MHz,  $\text{CD}_2\text{Cl}_2$ , rt)

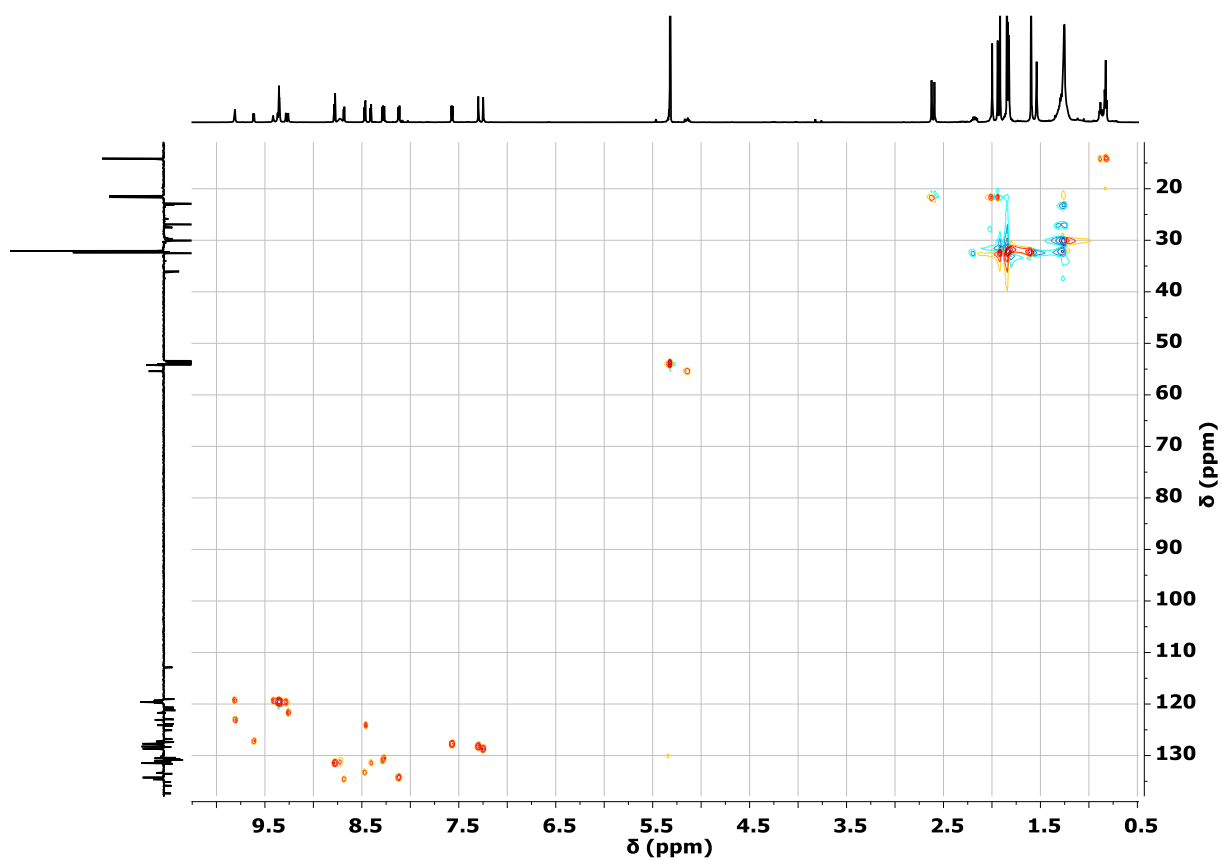

Figure S68.  $^1\text{H}$ - $^{13}\text{C}$  HSQC of HBC-NDI.

$^1\text{H}$ - $^{13}\text{C}$  HMBC (601 MHz,  $\text{CD}_2\text{Cl}_2$ , rt)

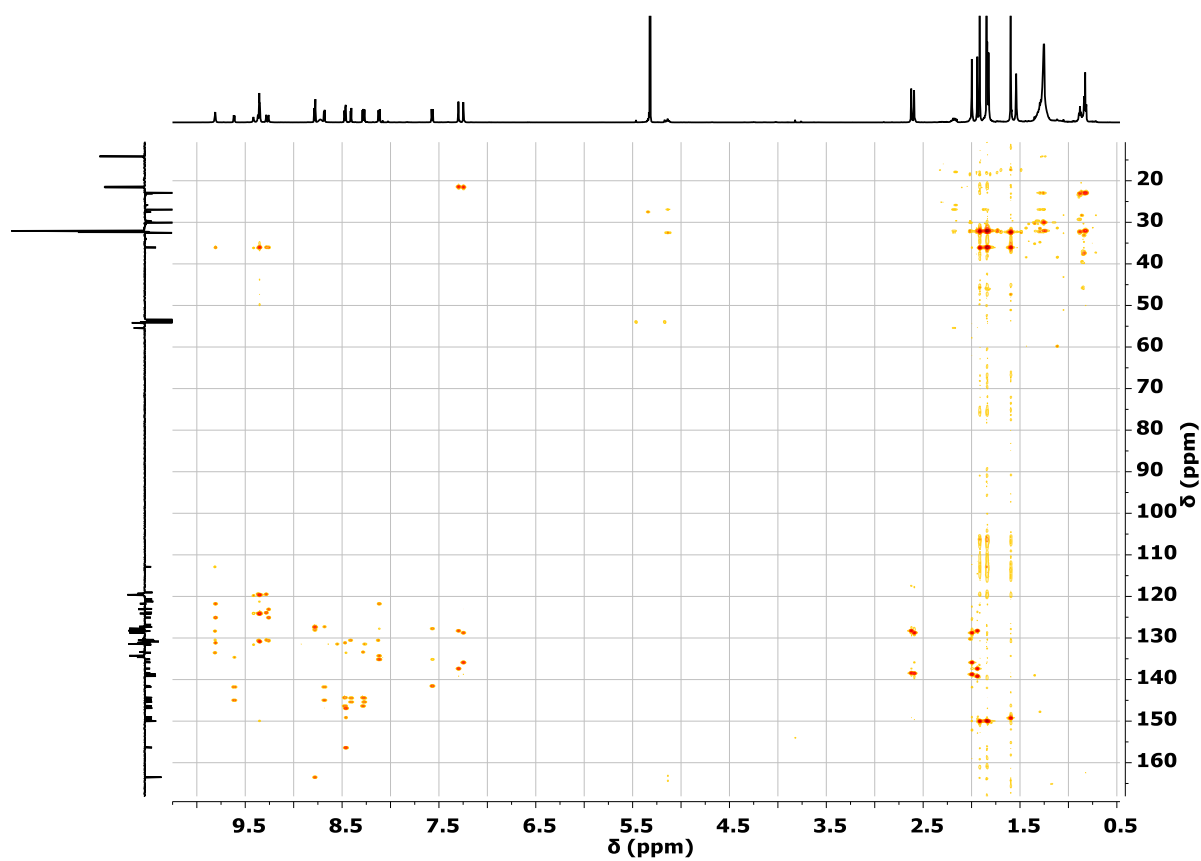

Figure S69.  $^1\text{H}$ - $^{13}\text{C}$  HMBC of HBC-NDI.

## MS (MALDI)

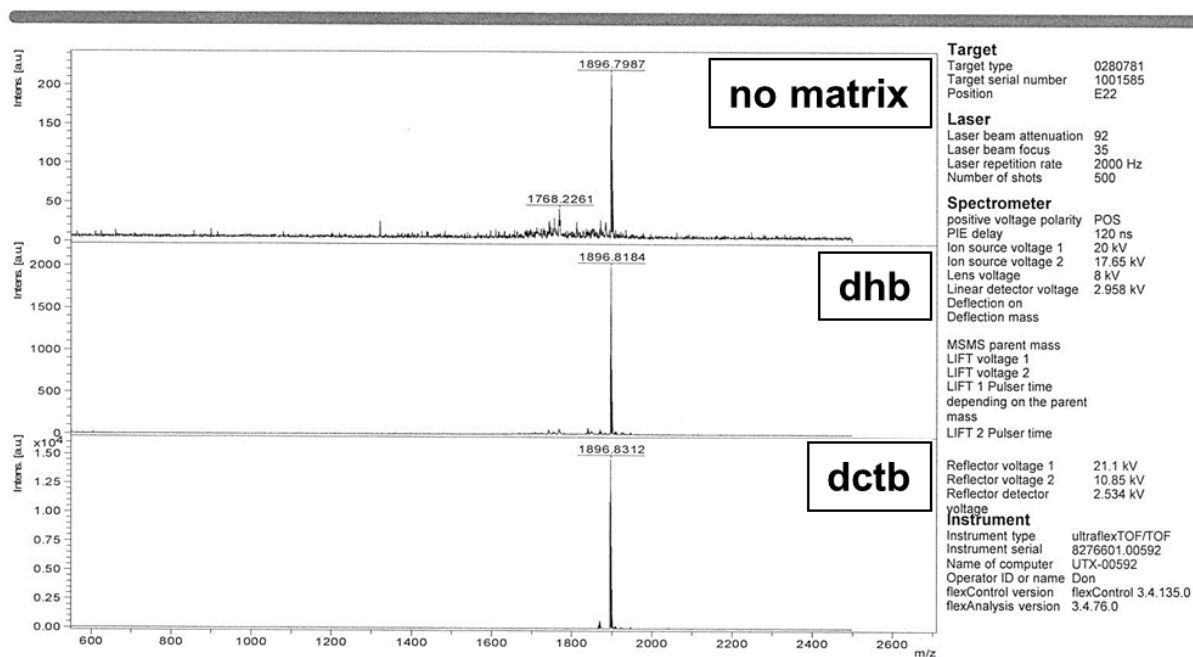

## HRMS (MALDI)

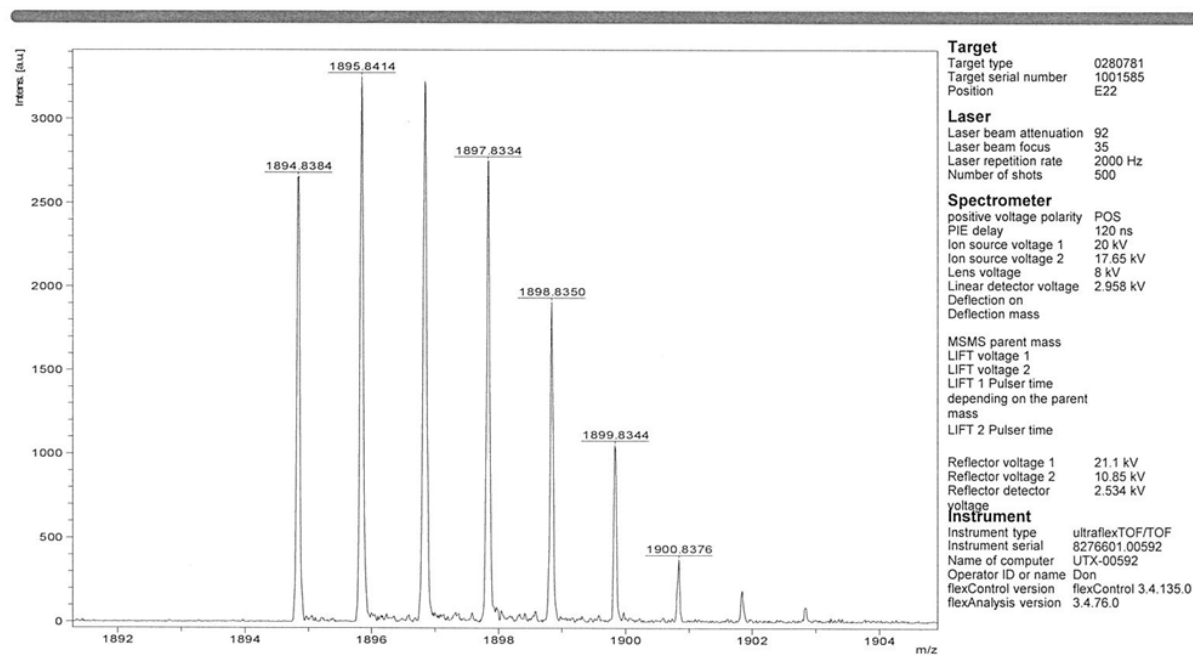

## SmartFormula

| Formula                      | Mass       | Error  | mSigma  | DbLEq | N rule | Electron Configuration |
|------------------------------|------------|--------|---------|-------|--------|------------------------|
| C 131 H<br>116 N 6 Ni<br>O 4 | 1,894.8406 | 1.1652 | 72.2838 | 77.00 | ok     | odd                    |

Figure S70. MS/HRMS (MALDI) of HBC-NDI.

$^1\text{H}$  NMR (601 MHz,  $\text{CD}_2\text{Cl}_2$ , rt)

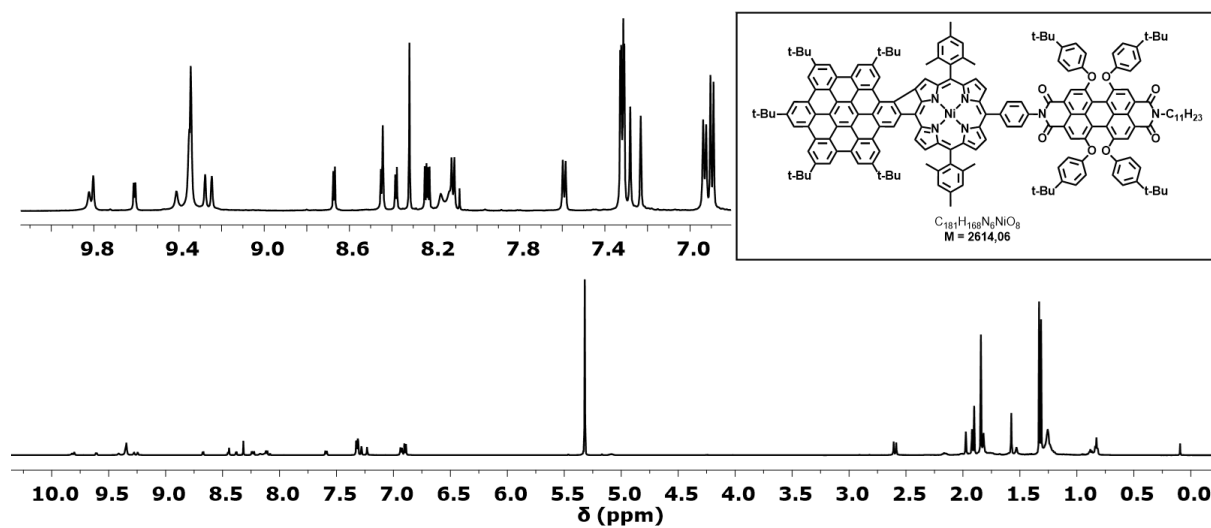

$^{13}\text{C}$  NMR - DEPTQ135 (151 MHz,  $\text{CD}_2\text{Cl}_2$ , rt)

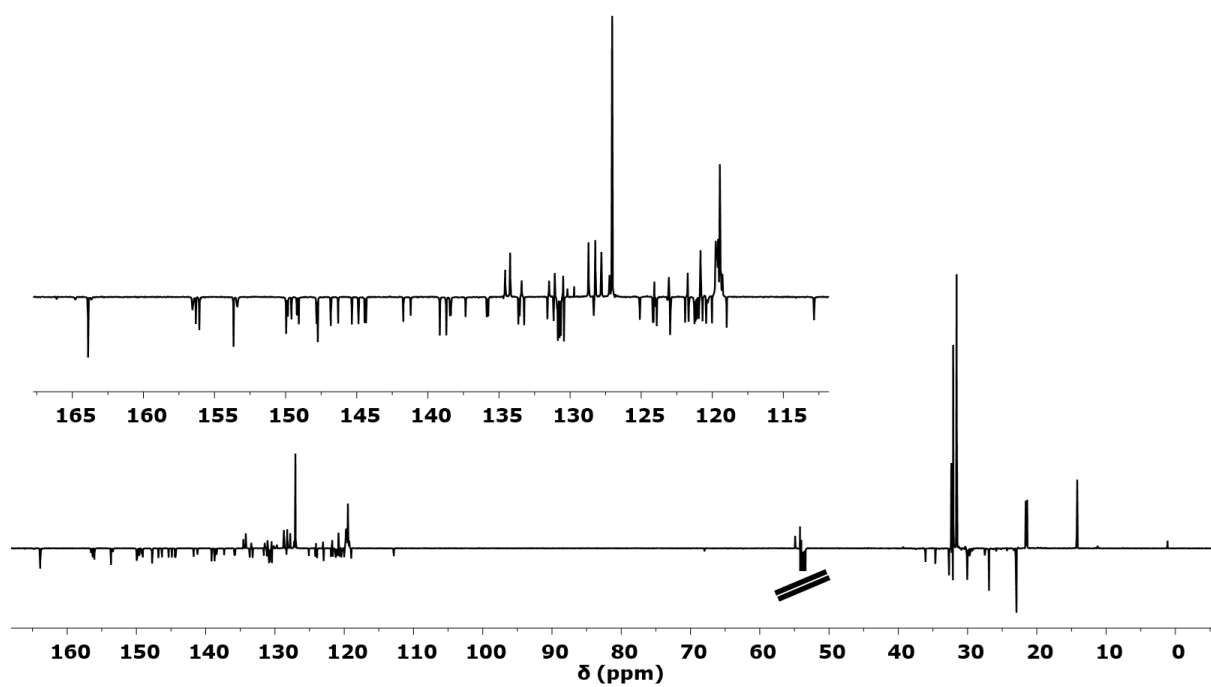

Figure S71.  $^1\text{H}$  and  $^{13}\text{C}$  NMR (DEPTQ135) of HBC-PDI.

$^1\text{H}$ - $^1\text{H}$  COSY (601 MHz,  $\text{CD}_2\text{Cl}_2$ , rt)

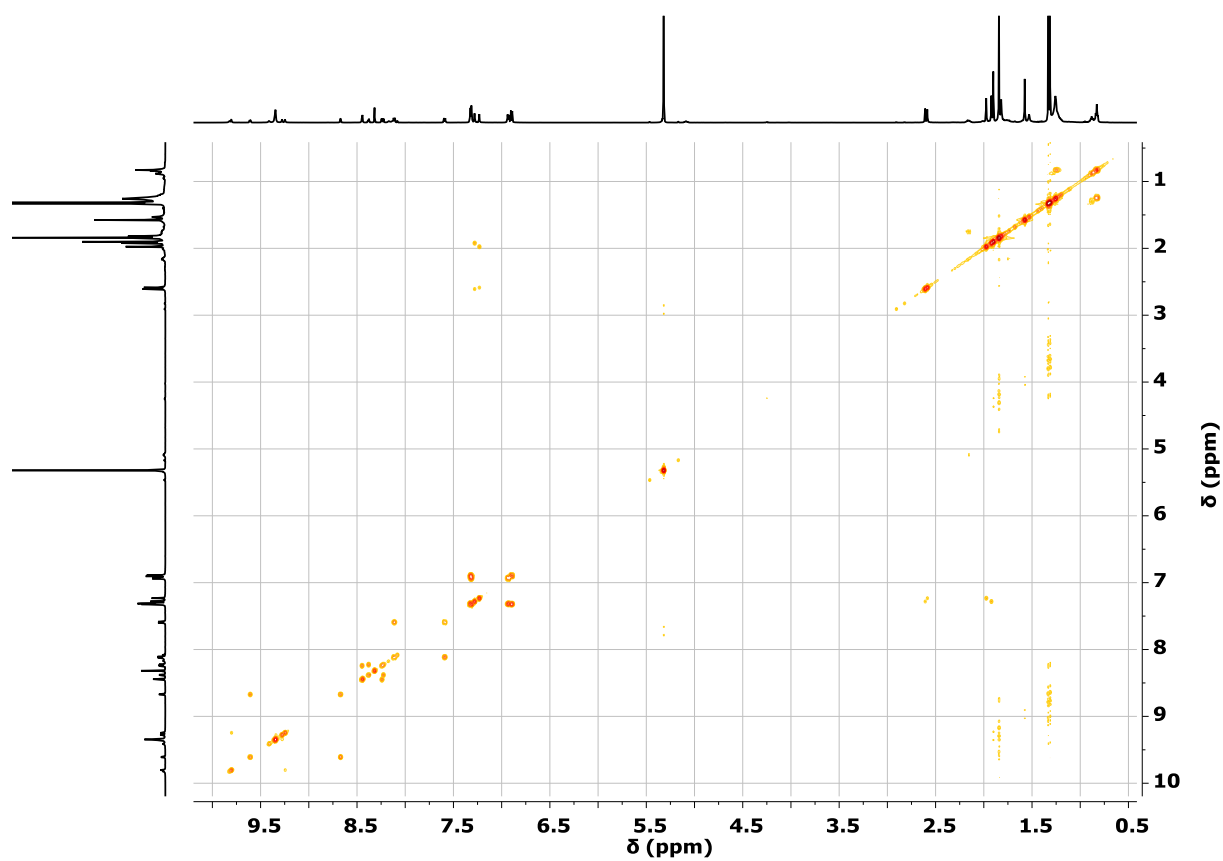

Figure S72.  $^1\text{H}$ - $^1\text{H}$  COSY of HBC-PDI.



$^1\text{H}$ - $^{13}\text{C}$  HSQC (601 MHz,  $\text{CD}_2\text{Cl}_2$ , rt)

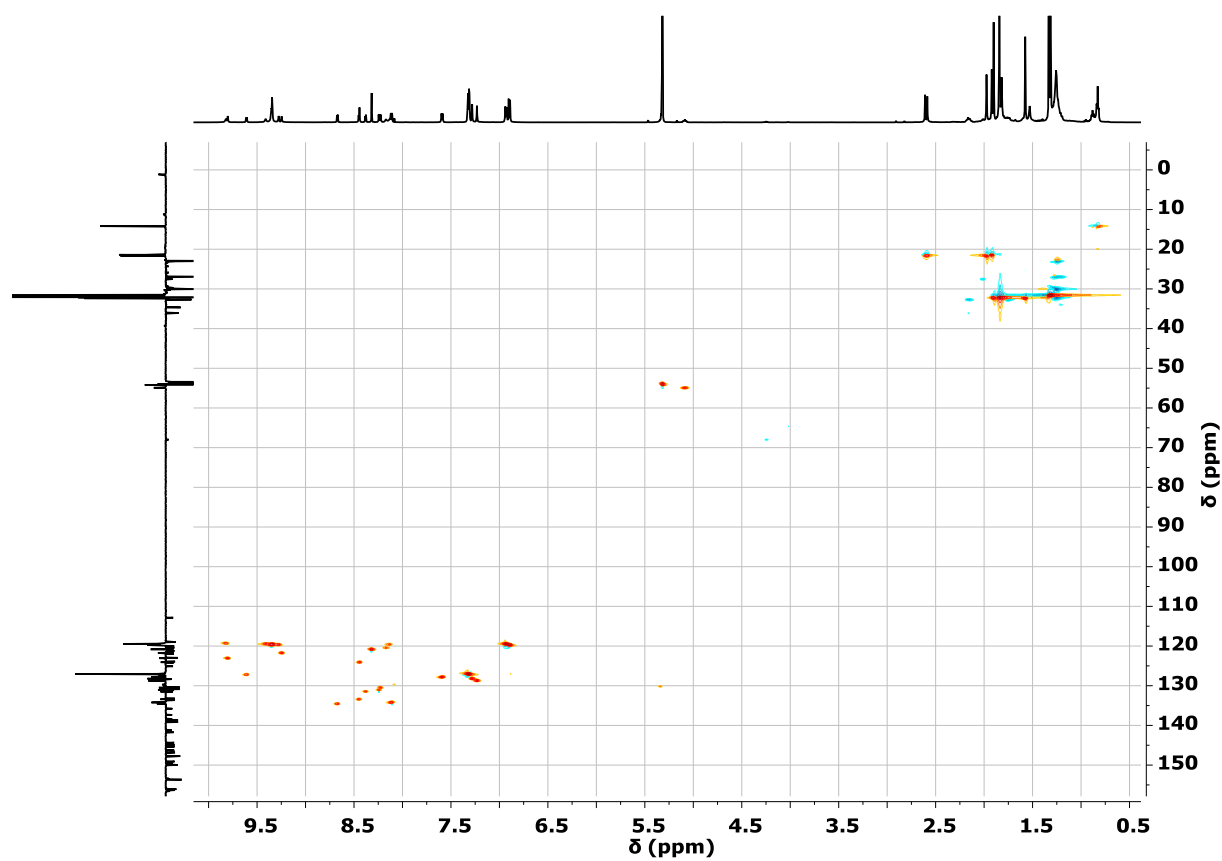

Figure S73.  $^1\text{H}$ - $^{13}\text{C}$  HSQC of HBC-PDI.

$^1\text{H}$ - $^{13}\text{C}$  HMBC (601 MHz,  $\text{CD}_2\text{Cl}_2$ , rt)

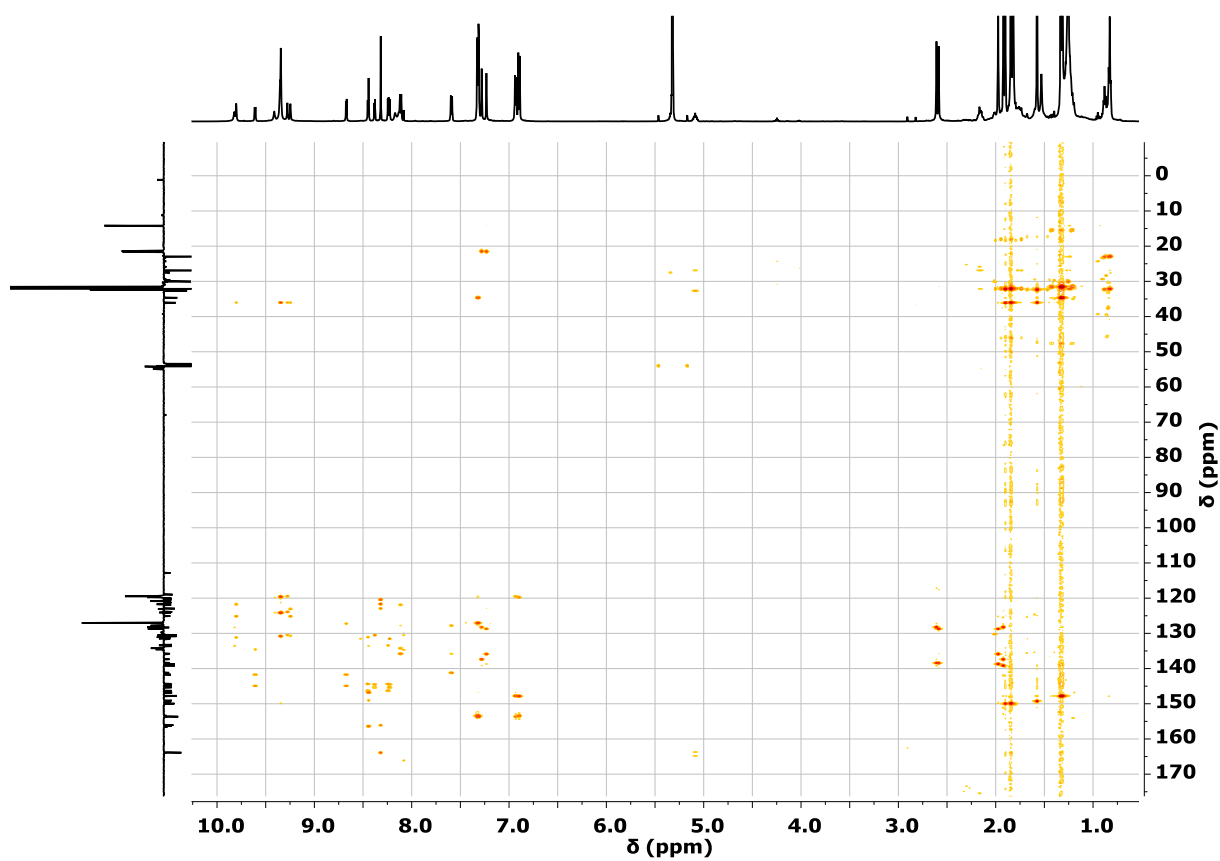

Figure S74.  $^1\text{H}$ - $^{13}\text{C}$  HMBC of HBC-PDI.

## MS (MALDI)

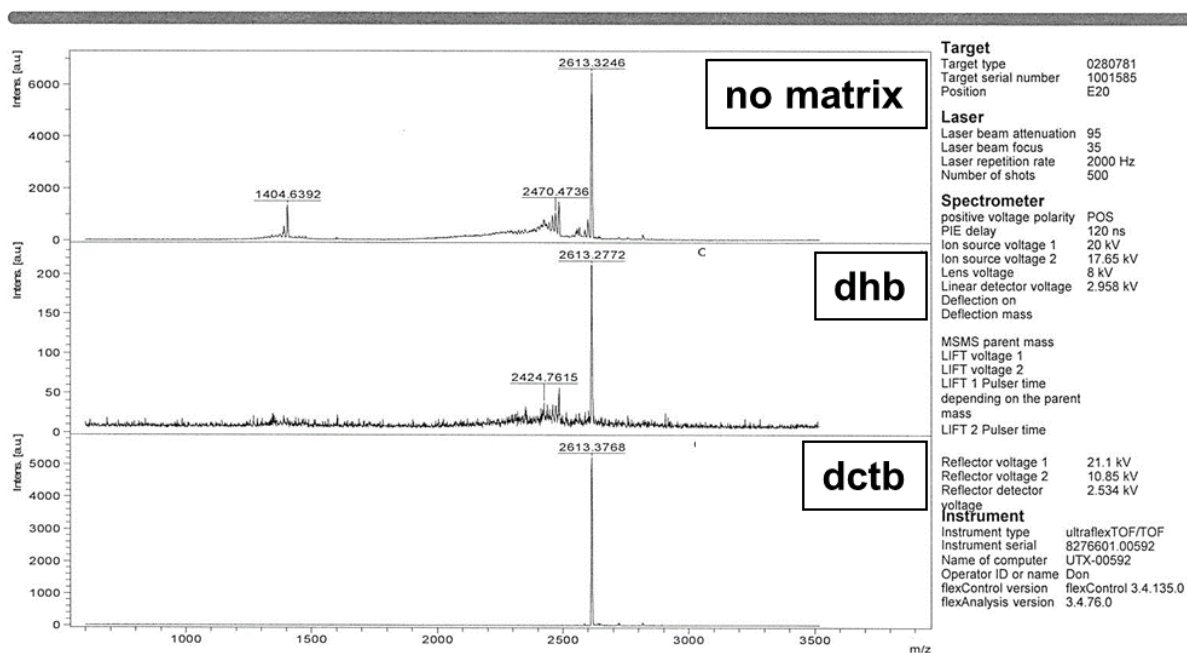

## HRMS (MALDI)

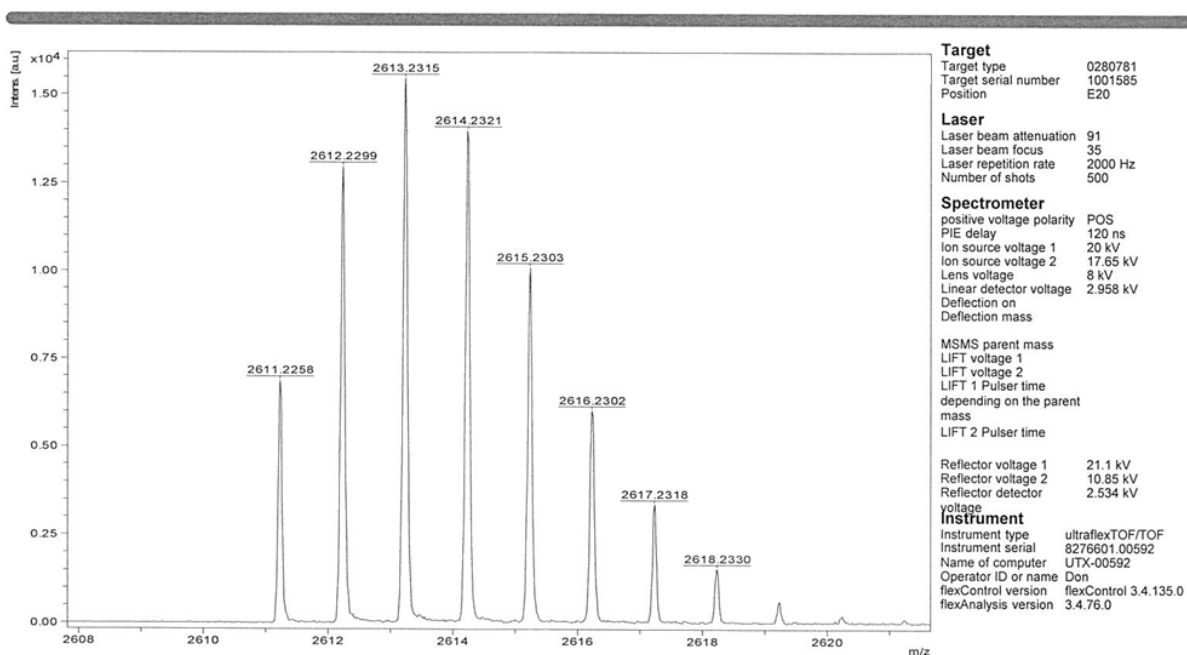

## SmartFormula

| Formula                      | Mass       | Error  | mSigma  | DbEq   | N rule | Electron Configuration |
|------------------------------|------------|--------|---------|--------|--------|------------------------|
| C 181 H<br>168 N 6 Ni<br>O 8 | 2,611.2272 | 0.5386 | 18.2456 | 101.00 | ok     | odd                    |

Figure S75. MS/HRMS (MALDI) of HBC-PDI.

$^1\text{H}$  NMR (601 MHz,  $\text{CD}_2\text{Cl}_2$ , rt)

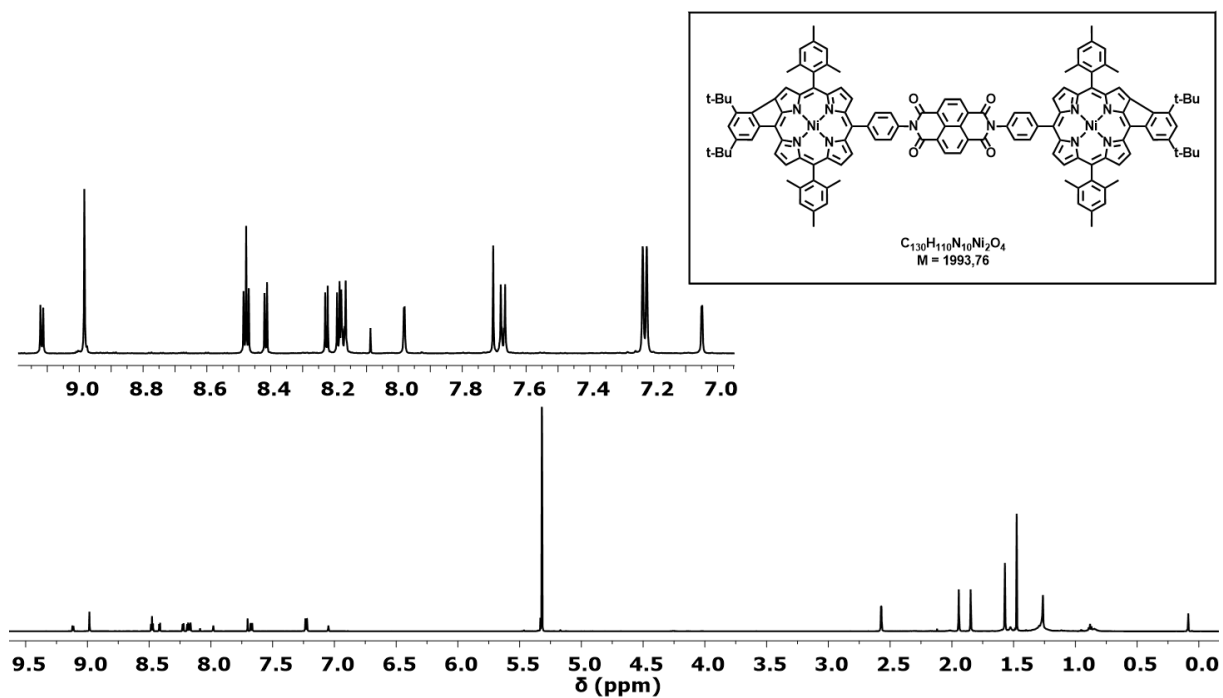

$^{13}\text{C}$  NMR - DEPTQ135 (151 MHz,  $\text{CD}_2\text{Cl}_2$ , rt)

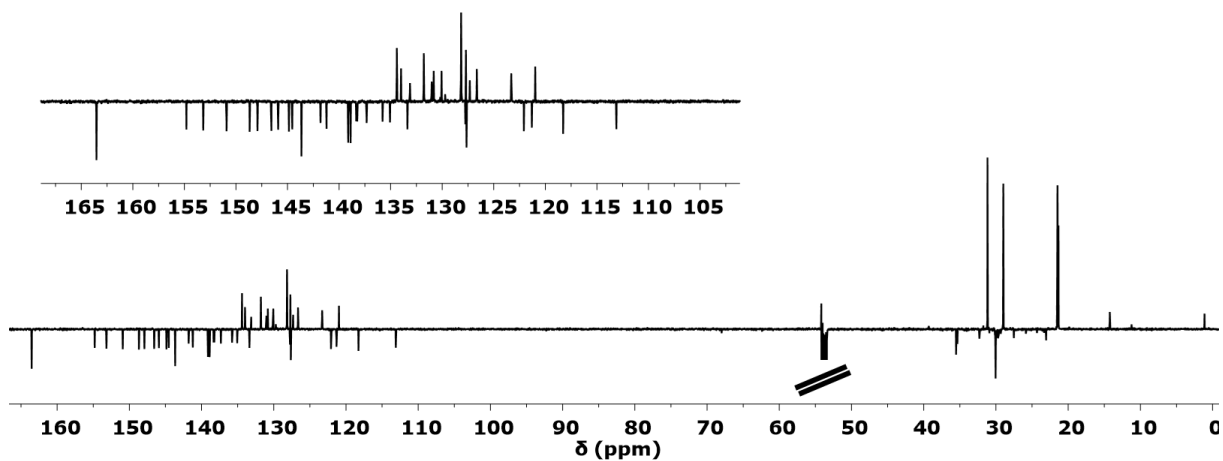

Figure S76.  $^1\text{H}$  and  $^{13}\text{C}$  NMR (DEPTQ135) of Ph-NDI-Ph.

$^1\text{H}$ - $^1\text{H}$  COSY (601 MHz,  $\text{CD}_2\text{Cl}_2$ , rt)

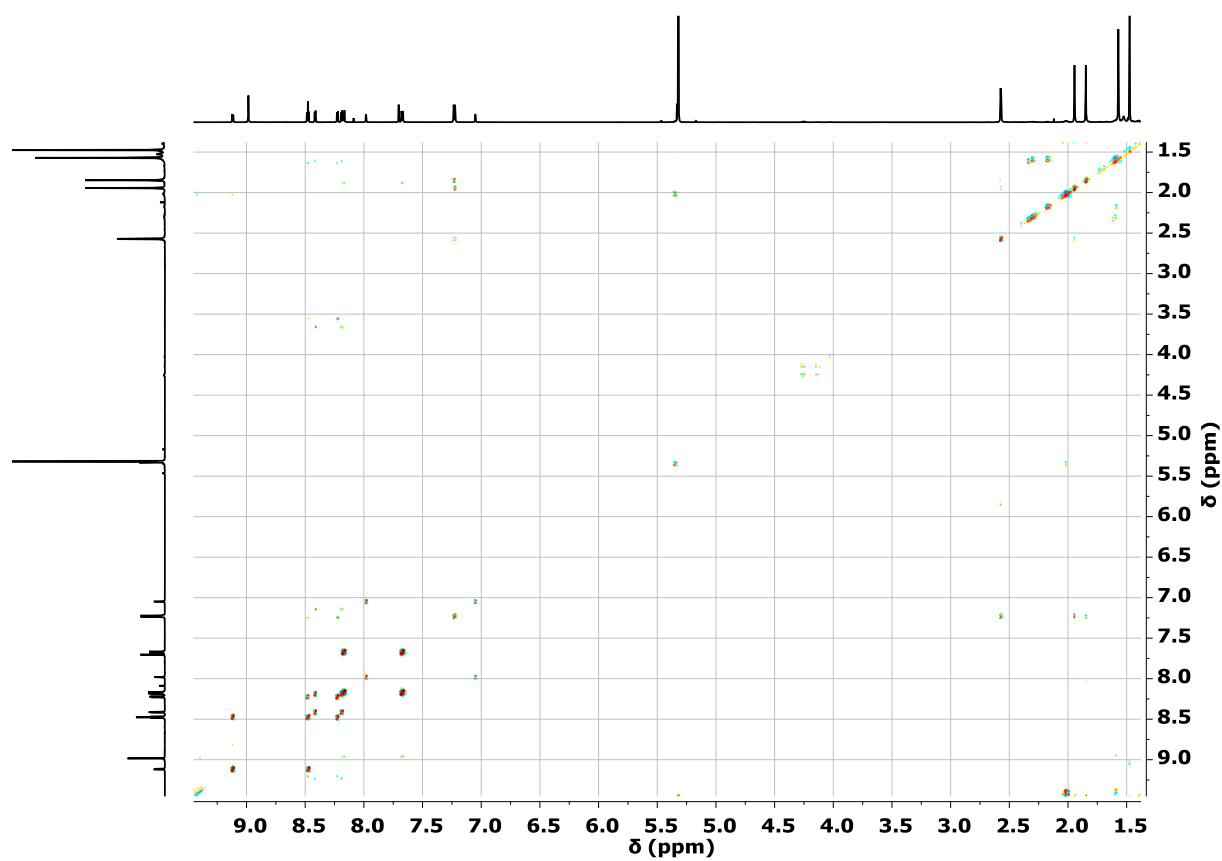

Figure S77.  $^1\text{H}$ - $^1\text{H}$  COSY of Ph-NDI-Ph.

$^1\text{H}$ - $^{13}\text{C}$  HSQC (601 MHz,  $\text{CD}_2\text{Cl}_2$ , rt)

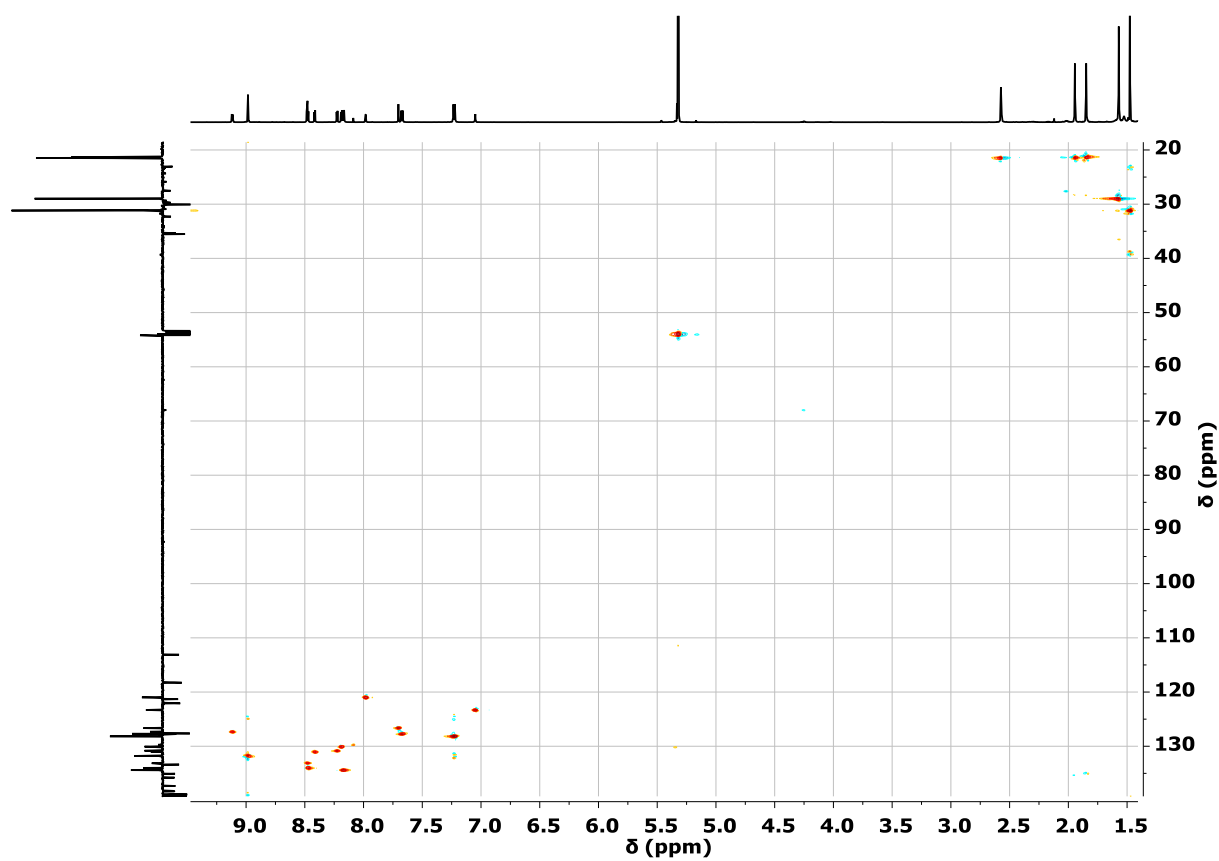

Figure S78.  $^1\text{H}$ - $^{13}\text{C}$  HSQC of Ph-NDI-Ph.

$^1\text{H}$ - $^{13}\text{C}$  HMBC (601 MHz,  $\text{CD}_2\text{Cl}_2$ , rt)

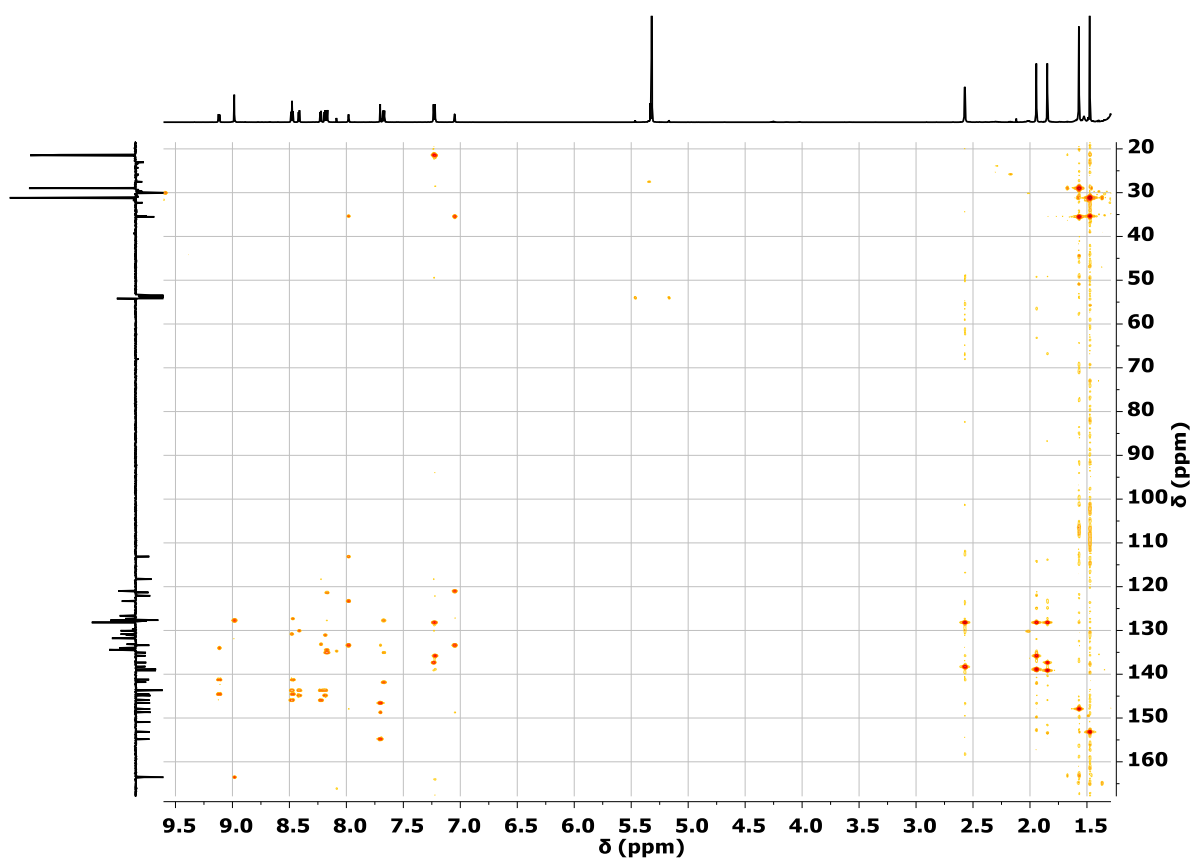

Figure S79.  $^1\text{H}$ - $^{13}\text{C}$  HMBC of Ph-NDI-Ph.

$^1\text{H}$ - $^1\text{H}$  ROESY (601 MHz,  $\text{CD}_2\text{Cl}_2$ , rt)

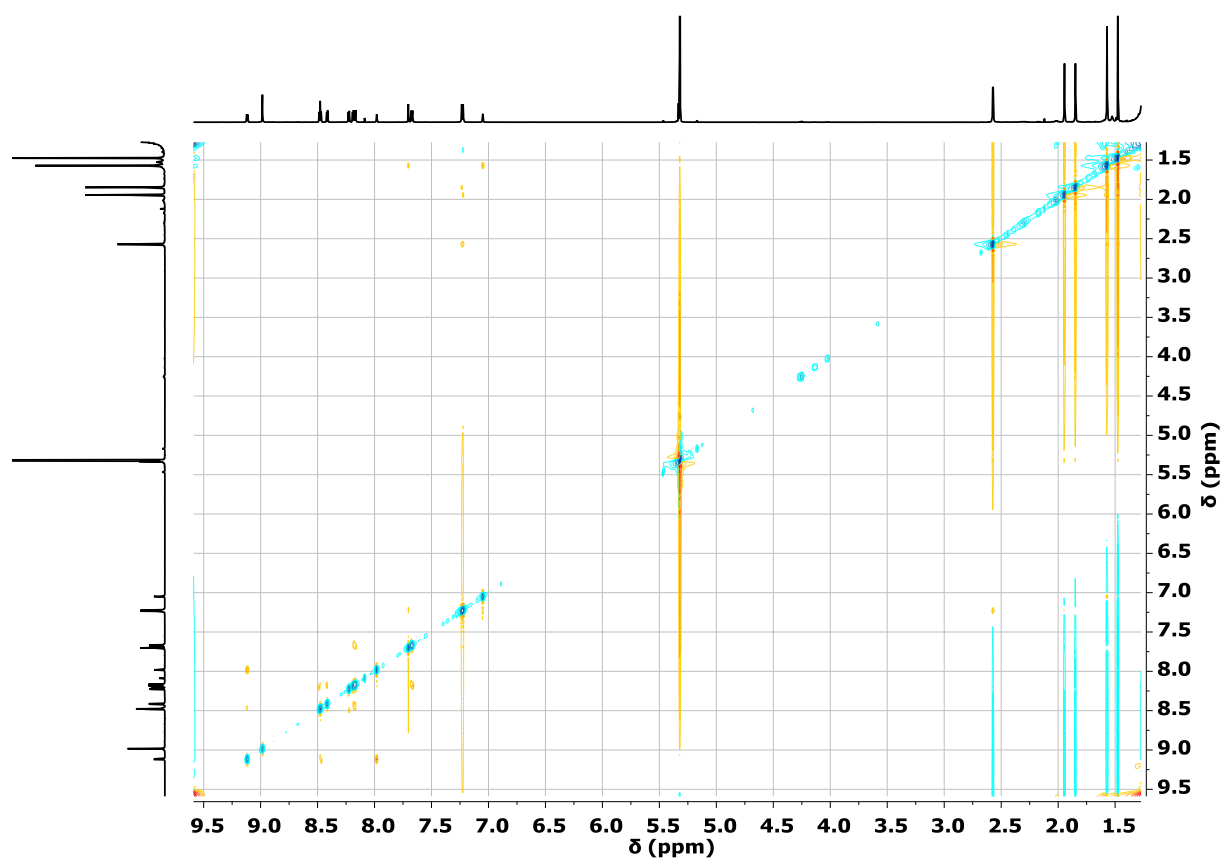

Figure S80.  $^1\text{H}$ - $^1\text{H}$  ROESY of Ph-NDI-Ph.



## MS (MALDI)

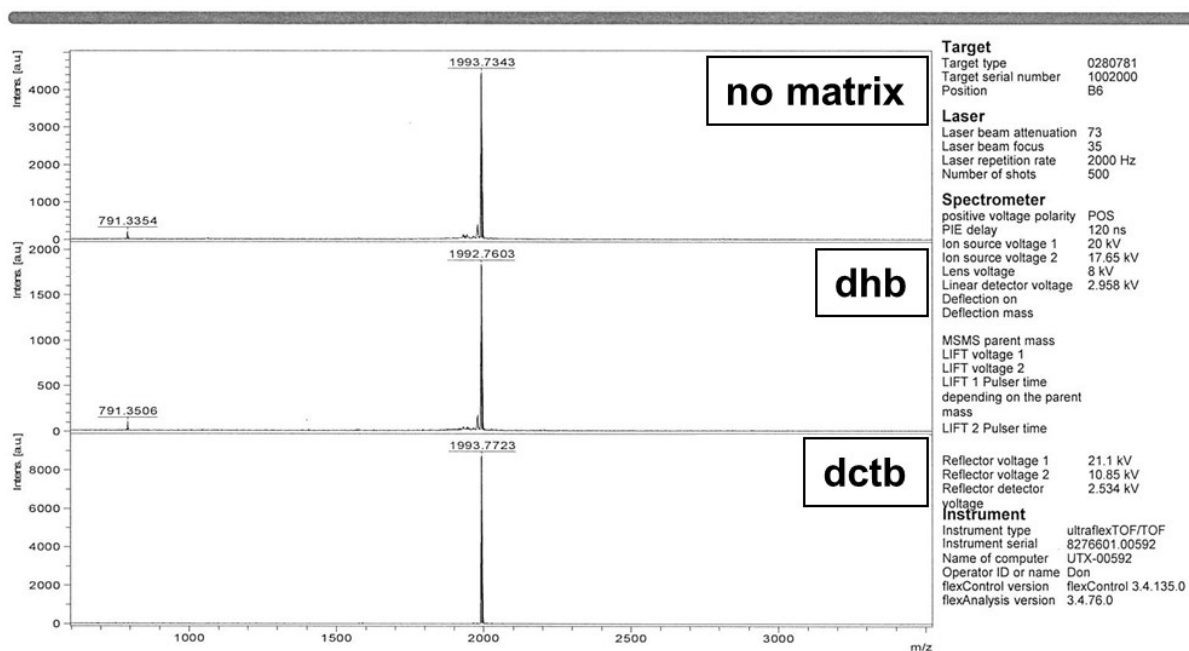

## HRMS (MALDI)

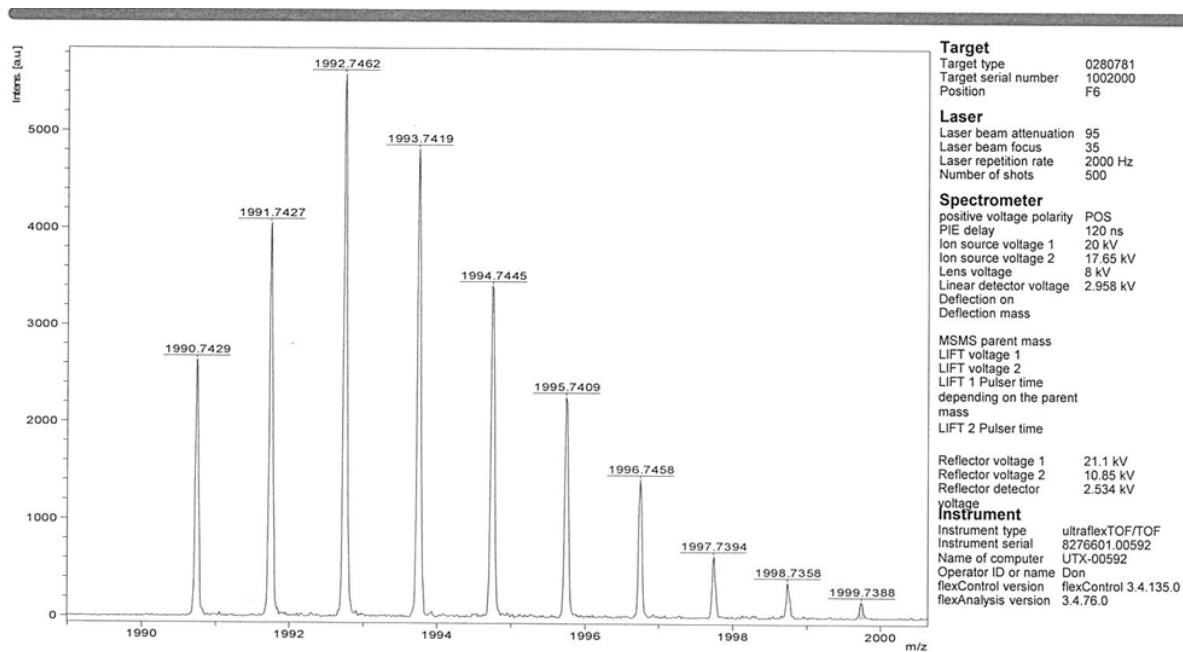

### SmartFormula

| Formula                         | Mass       | Error  | mSigma  | DblEq | N rule | Electron Configuration |
|---------------------------------|------------|--------|---------|-------|--------|------------------------|
| C 130 H<br>110 N 10<br>Ni 2 O 4 | 1,990.7413 | 0.7863 | 52.6432 | 81.00 | ok     | odd                    |

Figure S81. MS/HRMS (MALDI) of Ph-NDI-Ph.

$^1\text{H}$  NMR (601 MHz,  $\text{CD}_2\text{Cl}_2$ , rt)

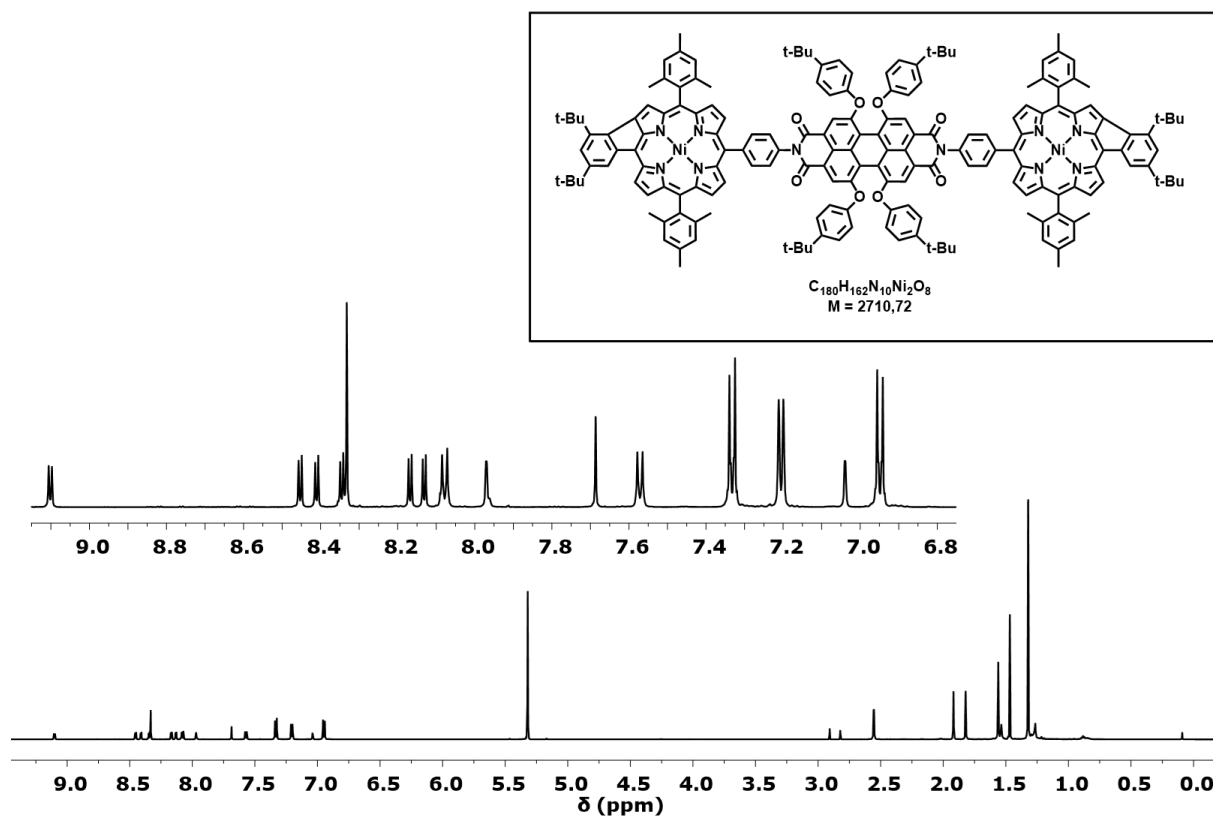

$^{13}\text{C}$  NMR - DEPTQ135 (151 MHz,  $\text{CD}_2\text{Cl}_2$ , rt)

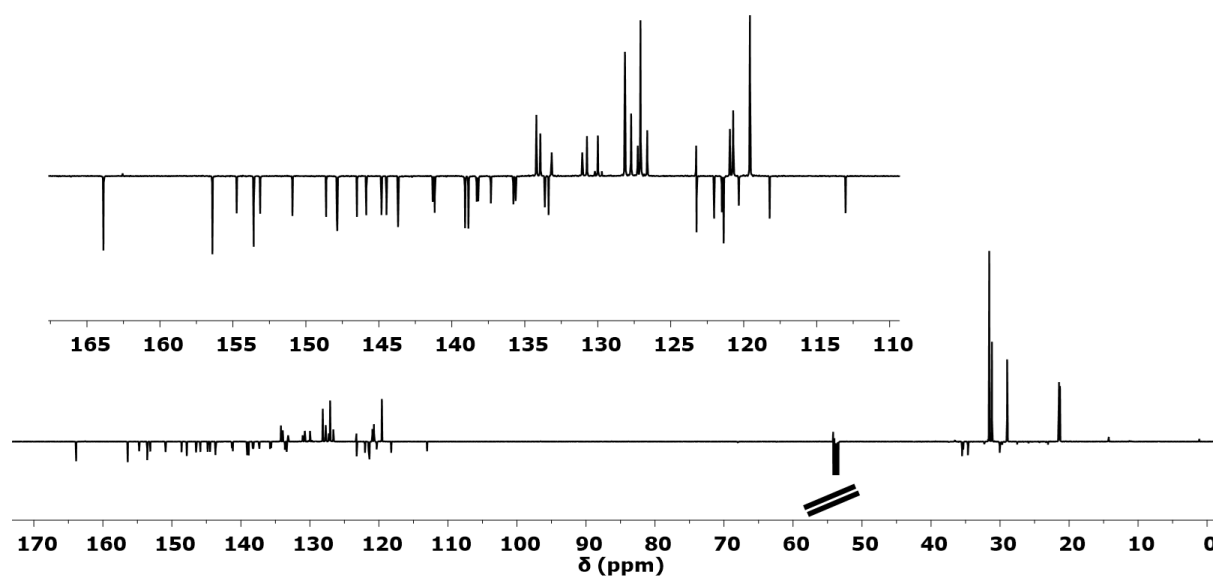

Figure S82.  $^1\text{H}$  and  $^{13}\text{C}$  NMR (DEPTQ135) of Ph-PDI-Ph.

$^1\text{H}$ - $^1\text{H}$  COSY (601 MHz,  $\text{CD}_2\text{Cl}_2$ , rt)

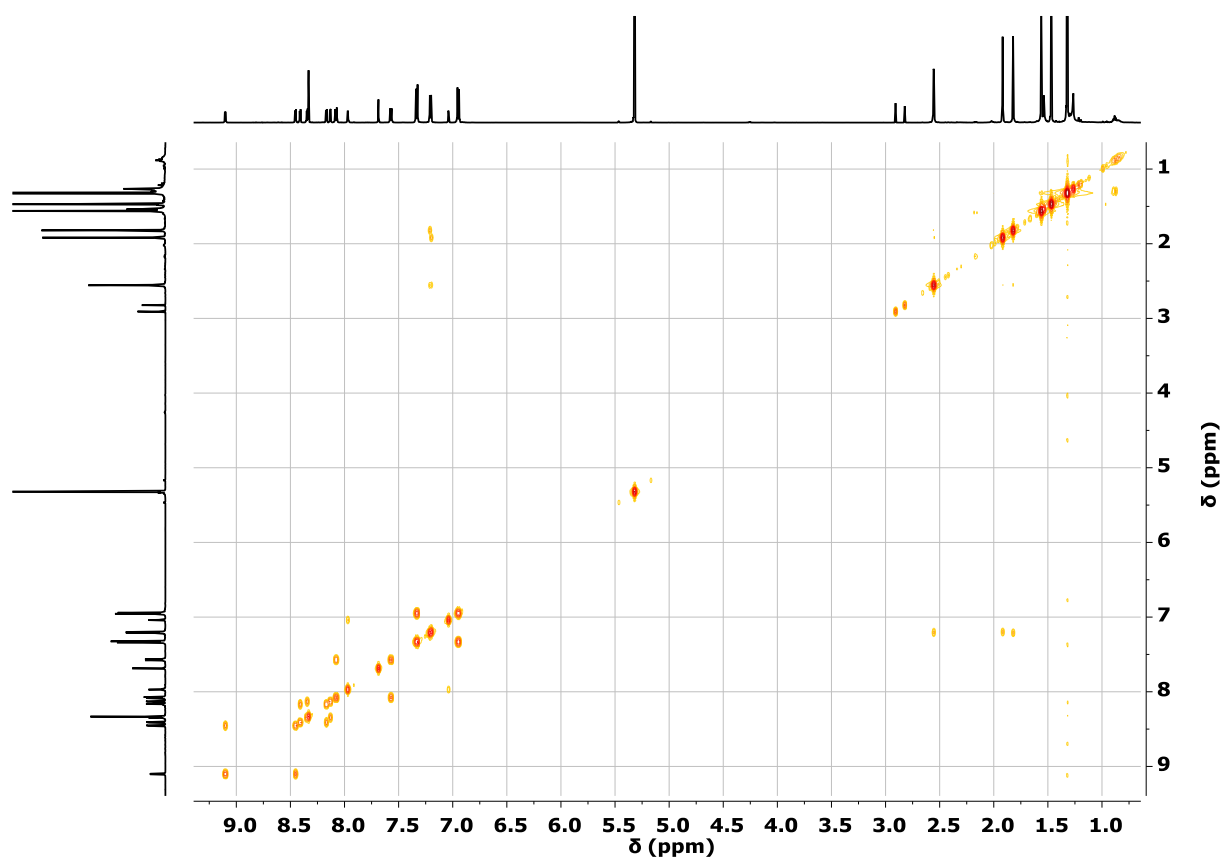

Figure S83.  $^1\text{H}$ - $^1\text{H}$  COSY of Ph-PDI-Ph.

$^1\text{H}$ - $^{13}\text{C}$  HSQC (601 MHz,  $\text{CD}_2\text{Cl}_2$ , rt)

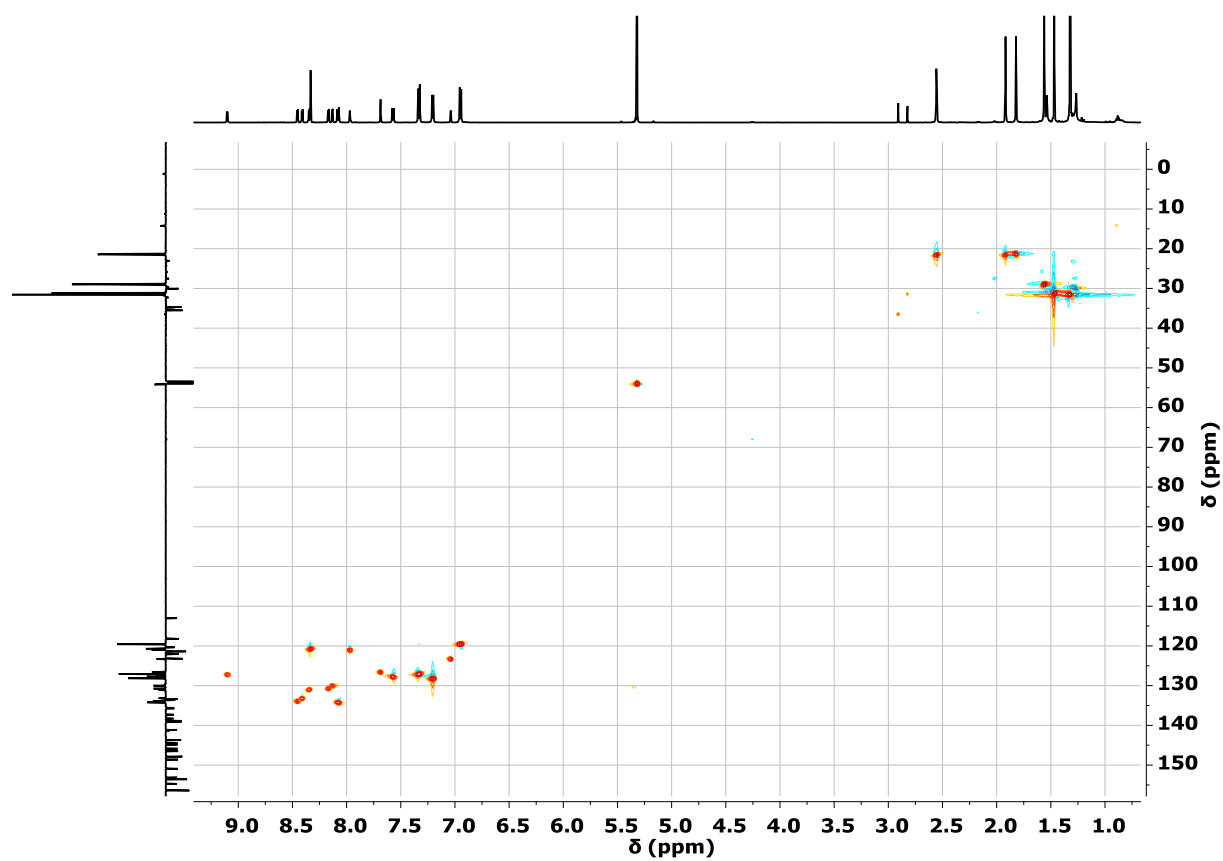

Figure S84.  $^1\text{H}$ - $^{13}\text{C}$  HSQC of Ph-PDI-Ph.

$^1\text{H}$ - $^{13}\text{C}$  HMBC (601 MHz,  $\text{CD}_2\text{Cl}_2$ , rt)

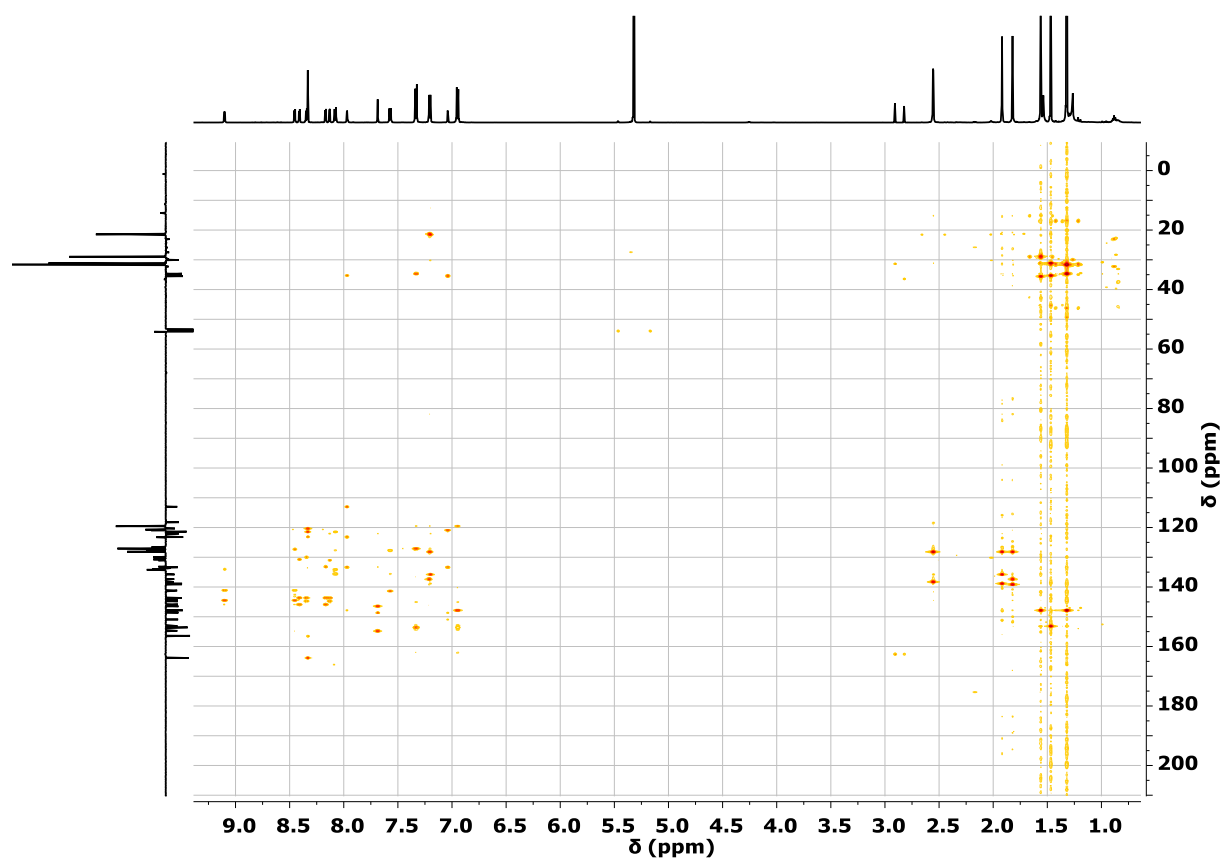

Figure S85.  $^1\text{H}$ - $^{13}\text{C}$  HMBC of Ph-PDI-Ph.

## MS (MALDI)

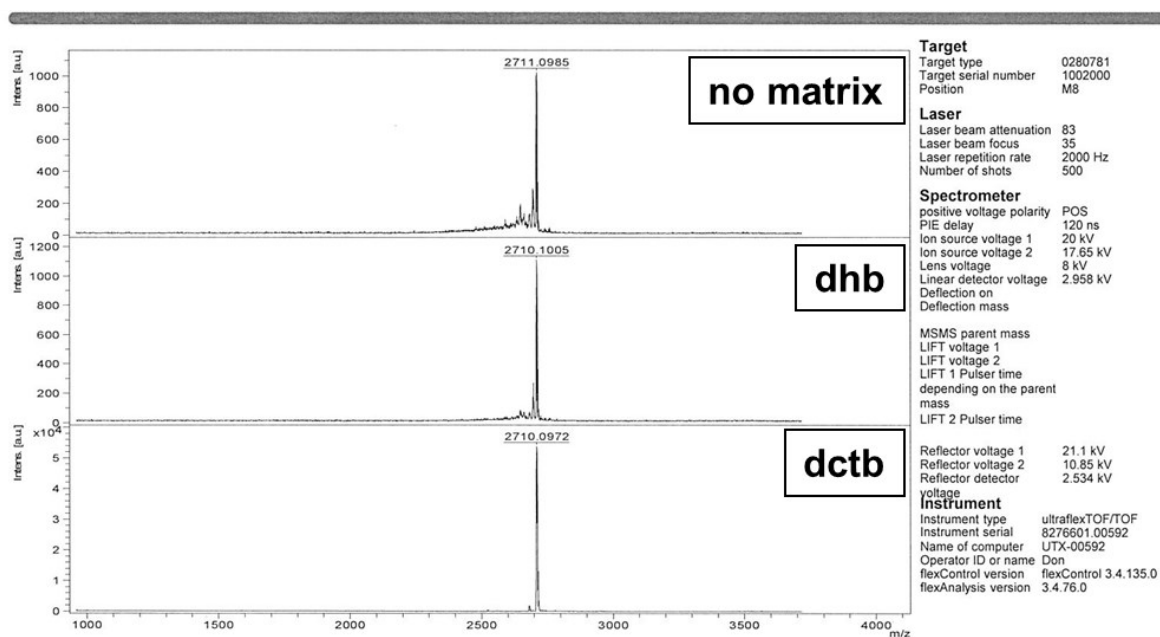

## HRMS (MALDI)

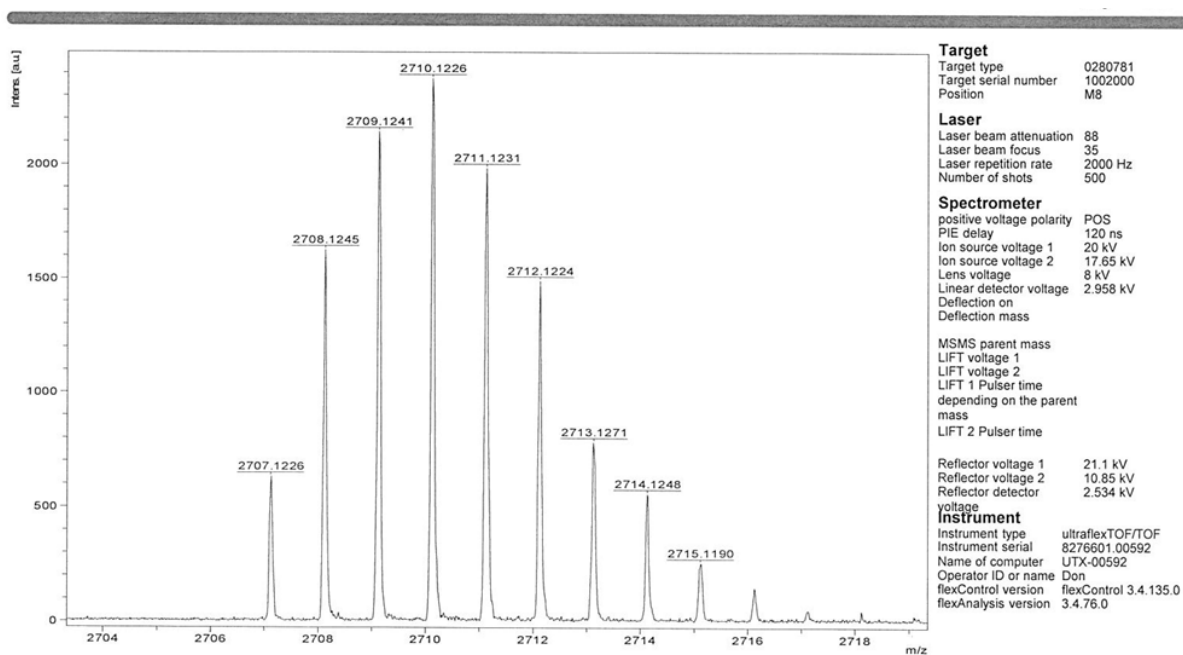

## SmartFormula

| Formula                         | Mass       | Error  | mSigma  | DbEq   | N rule | Electron Configuration |
|---------------------------------|------------|--------|---------|--------|--------|------------------------|
| C 180 H<br>162 N 10<br>Ni 2 O 8 | 2,707.1278 | 1.9513 | 49.1967 | 105.00 | ok     | odd                    |

Figure S86. MS/HRMS (MALDI) of Ph-PDI-Ph.

$^1\text{H}$  NMR (601 MHz,  $\text{CD}_2\text{Cl}_2/\text{CS}_2$ , rt)

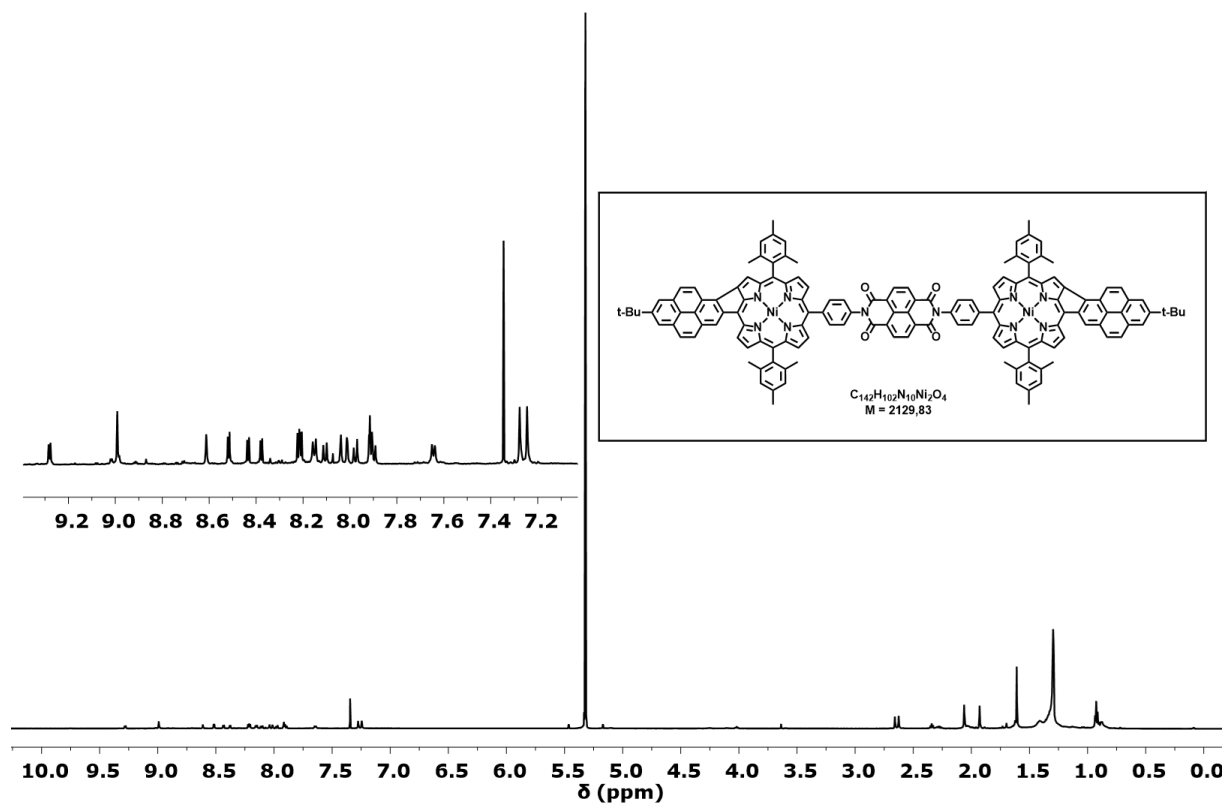

$^{13}\text{C}$  NMR - DEPTQ135 (151 MHz,  $\text{CD}_2\text{Cl}_2$ , rt)

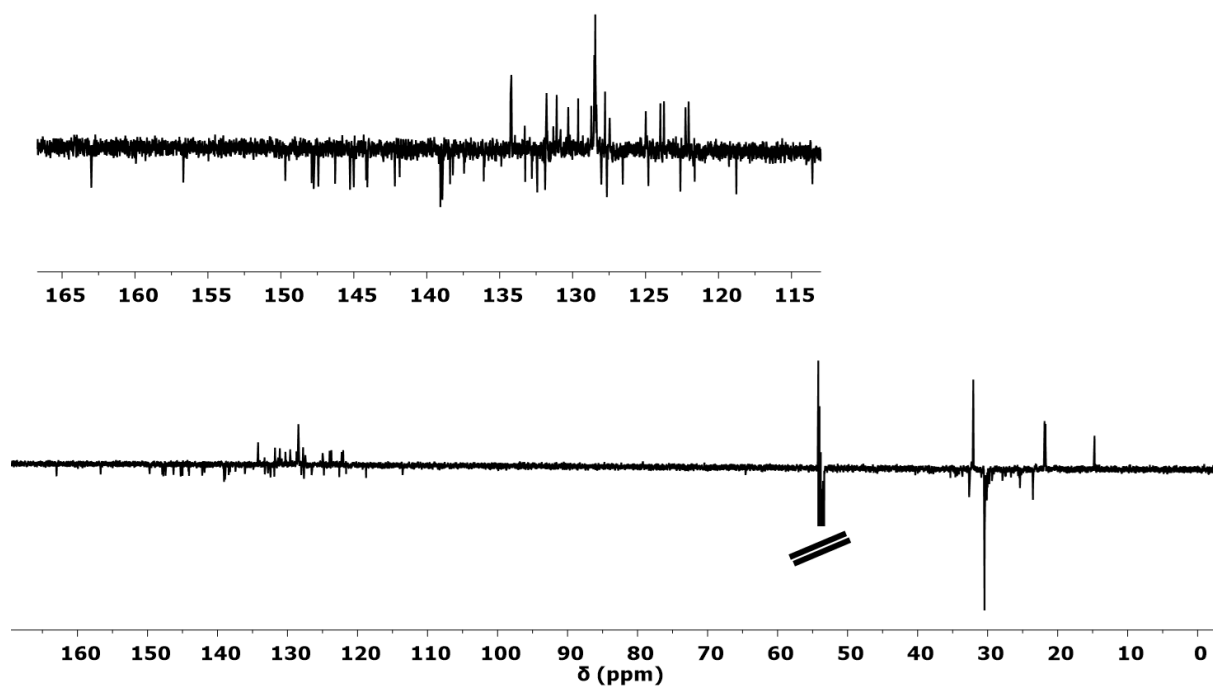

Figure S87.  $^1\text{H}$  and  $^{13}\text{C}$  NMR (DEPTQ135) of Pyr-NDI-Pyr.

$^1\text{H}$ - $^1\text{H}$  COSY (601 MHz,  $\text{CD}_2\text{Cl}_2/\text{CS}_2$ , rt)

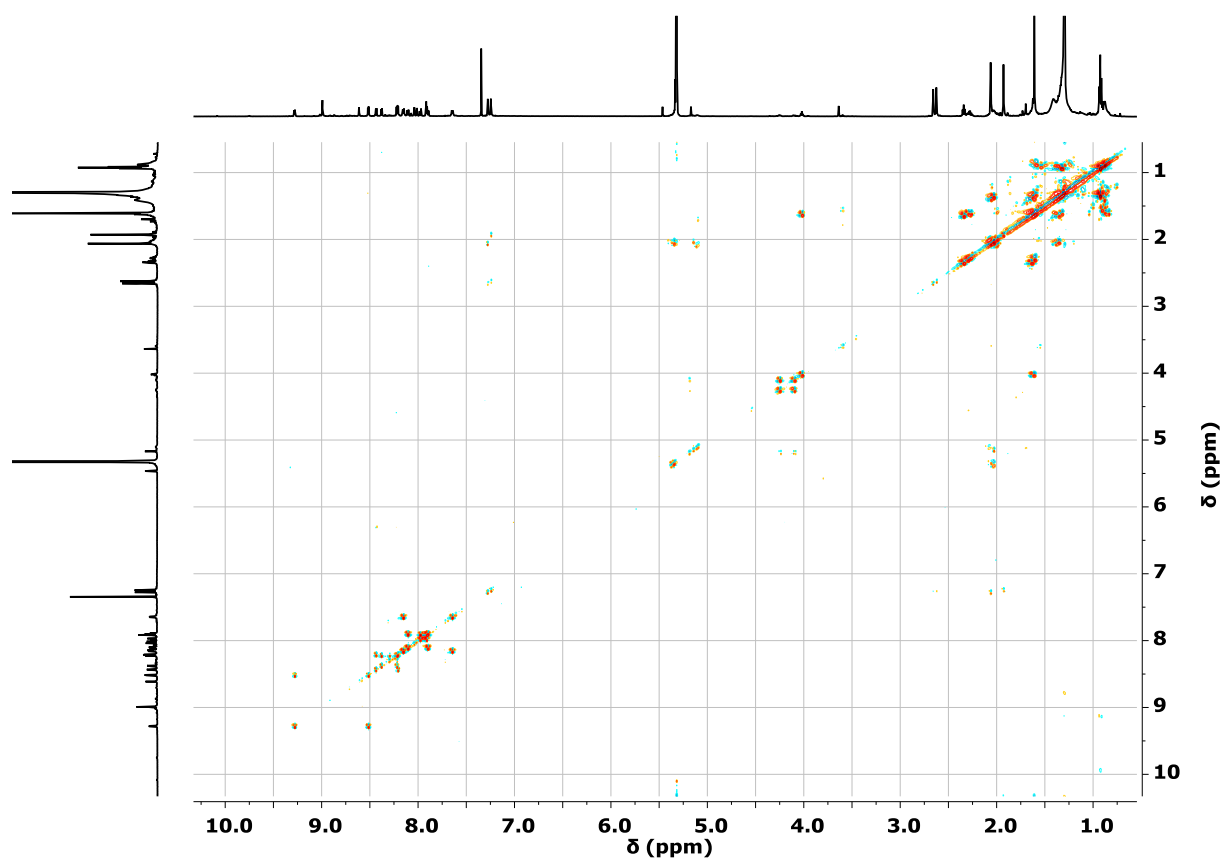

Figure S88.  $^1\text{H}$ - $^1\text{H}$  COSY of Pyr-NDI-Pyr.



$^1\text{H}$ - $^{13}\text{C}$  HSQC (601 MHz,  $\text{CD}_2\text{Cl}_2/\text{CS}_2$ , rt)

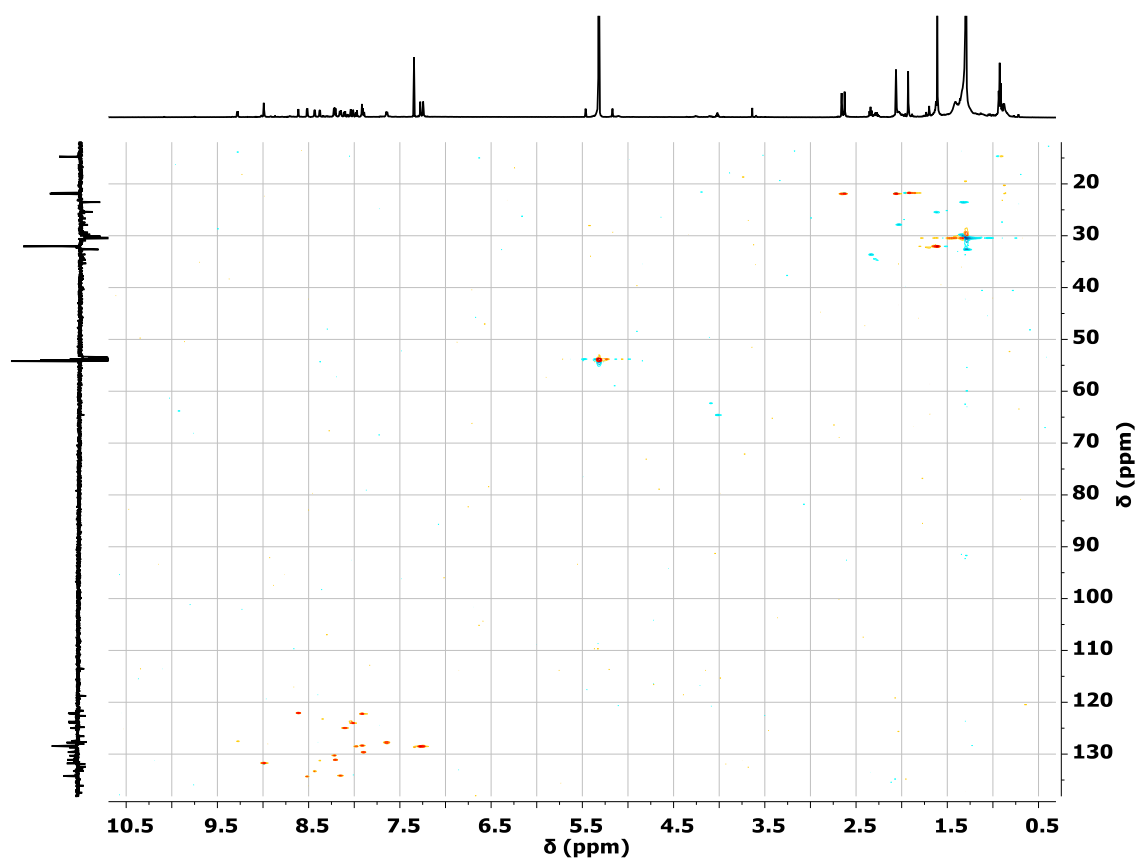

Figure S89.  $^1\text{H}$ - $^{13}\text{C}$  HSQC of Pyr-NDI-Pyr.

$^1\text{H}$ - $^{13}\text{C}$  HMBC (601 MHz,  $\text{CD}_2\text{Cl}_2/\text{CS}_2$ , rt)

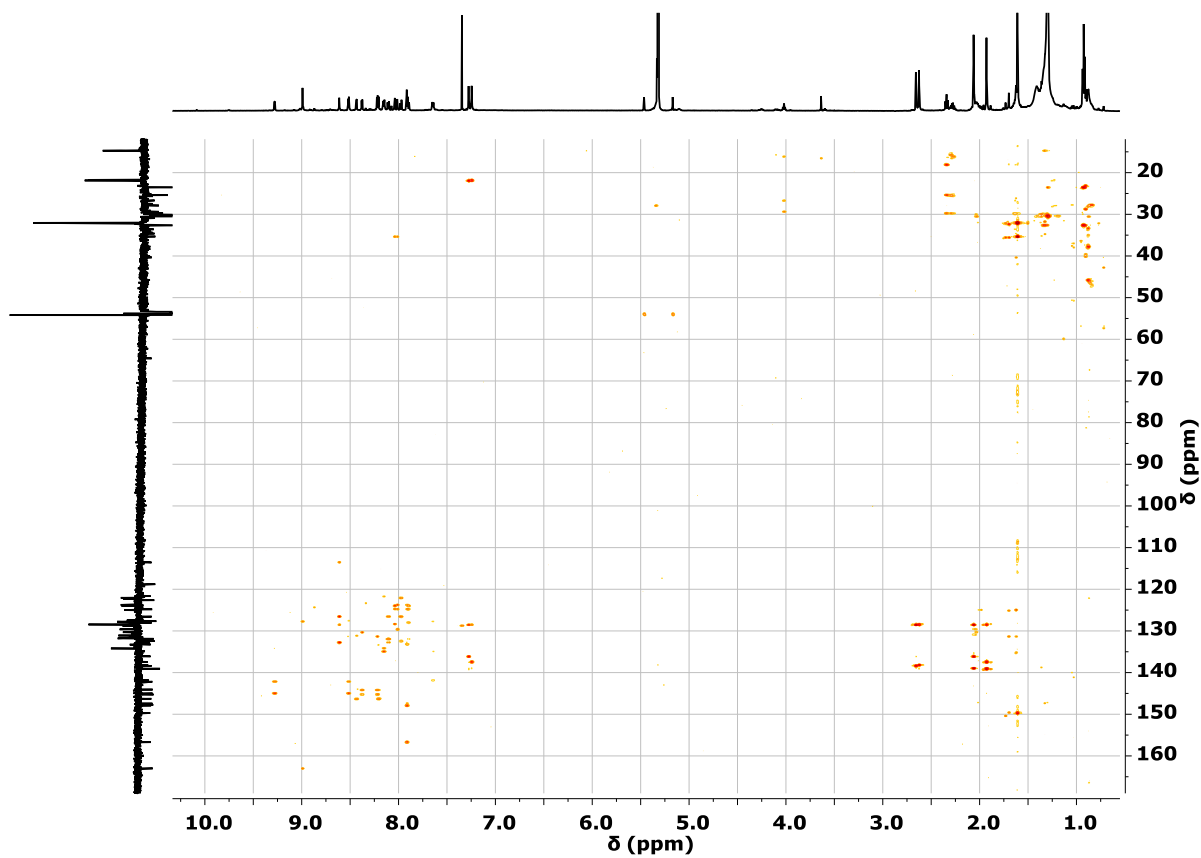

Figure S90.  $^1\text{H}$ - $^{13}\text{C}$  HMBC of Pyr-NDI-Pyr.

$^1\text{H}$ - $^1\text{H}$  ROESY (601 MHz,  $\text{CD}_2\text{Cl}_2/\text{CS}_2$ , rt)

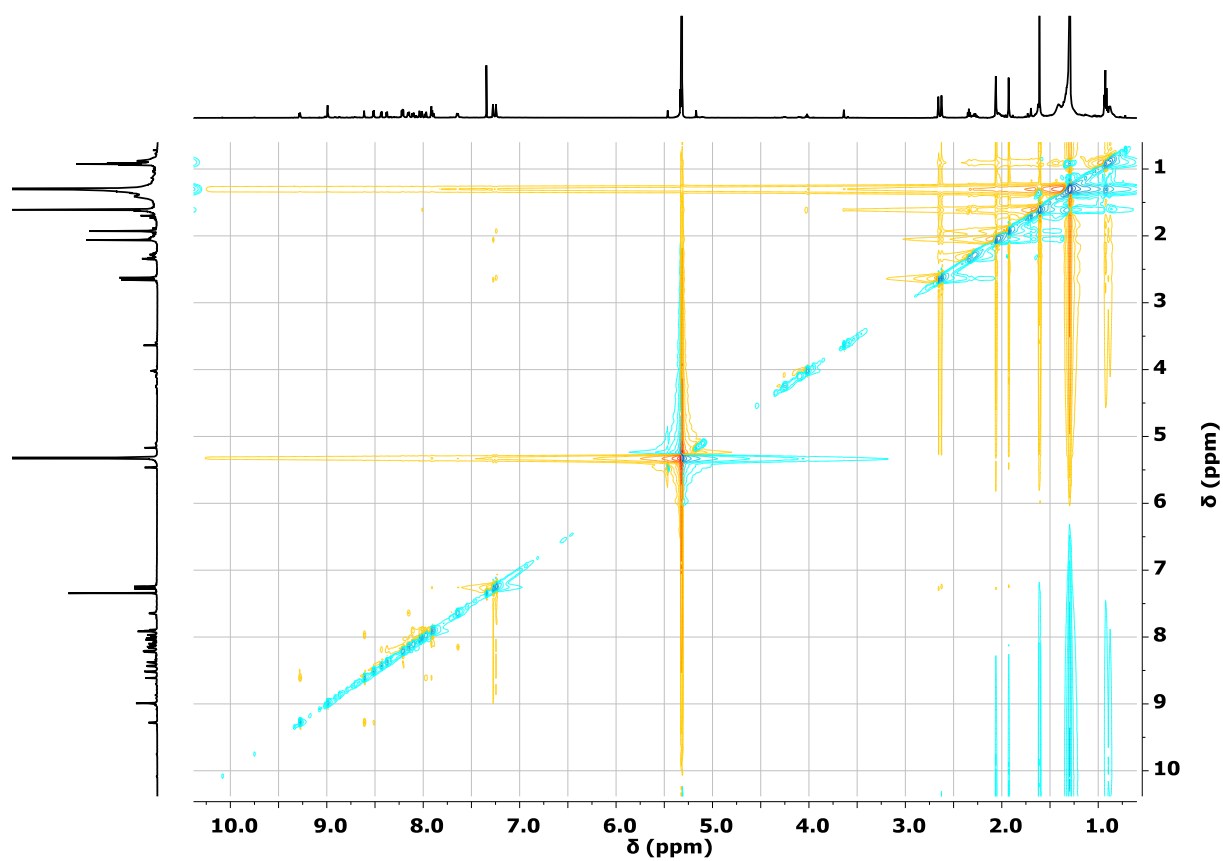

Figure S91.  $^1\text{H}$ - $^1\text{H}$  ROESY of Pyr-NDI-Pyr.

## MS (MALDI)

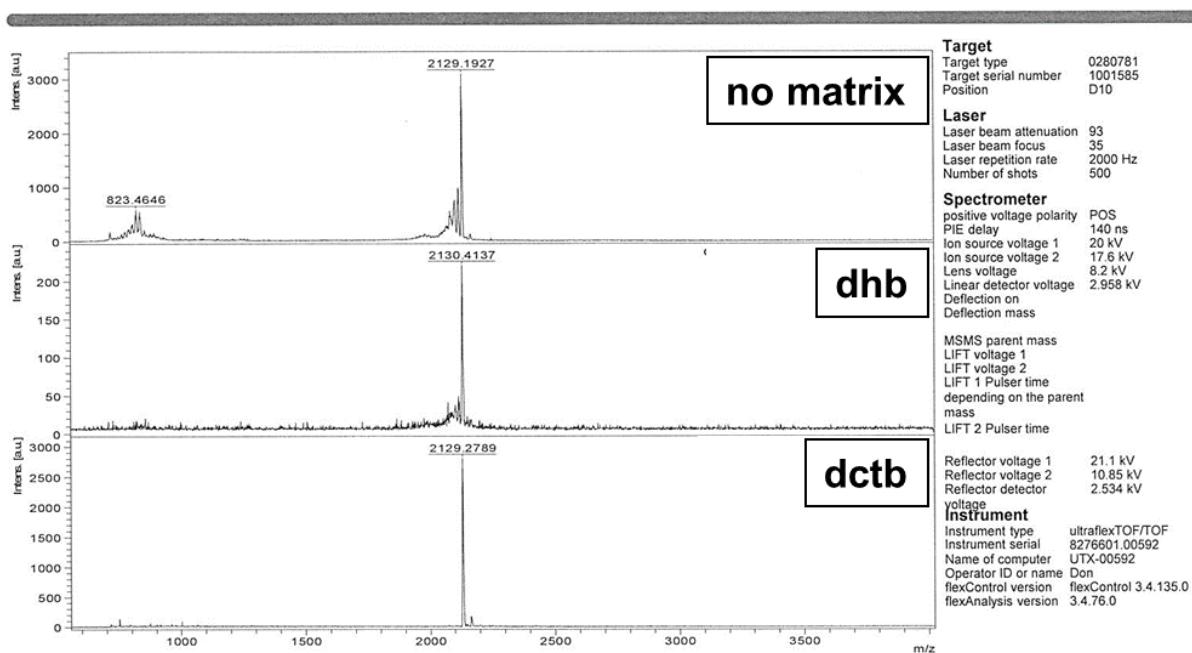

## HRMS (MALDI)

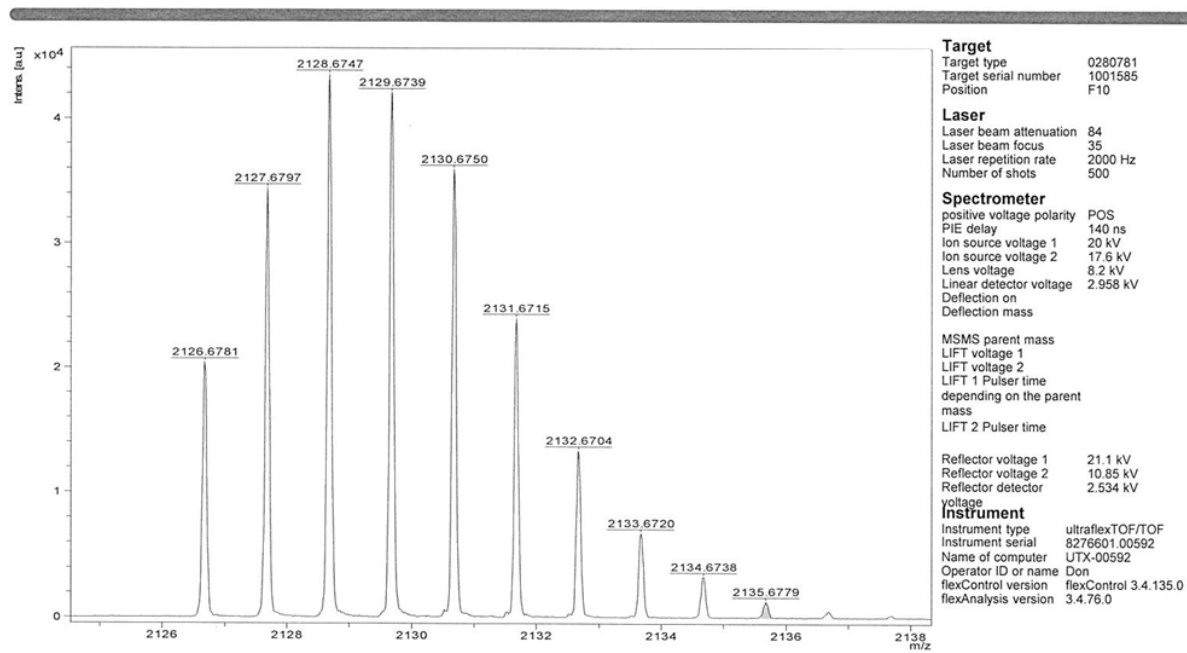

### SmartFormula

| Formula                         | Mass       | Error  | mSigma  | DblEq | N rule | Electron Configuration |
|---------------------------------|------------|--------|---------|-------|--------|------------------------|
| C 142 H<br>102 N 10<br>Ni 2 O 4 | 2,126.6787 | 0.2795 | 26.3358 | 97.00 | ok     | odd                    |

Figure S92. MS/HRMS (MALDI) of Pyr-NDI-Pyr.

$^1\text{H}$  NMR (601 MHz,  $\text{CD}_2\text{Cl}_2/\text{CS}_2$ , rt)

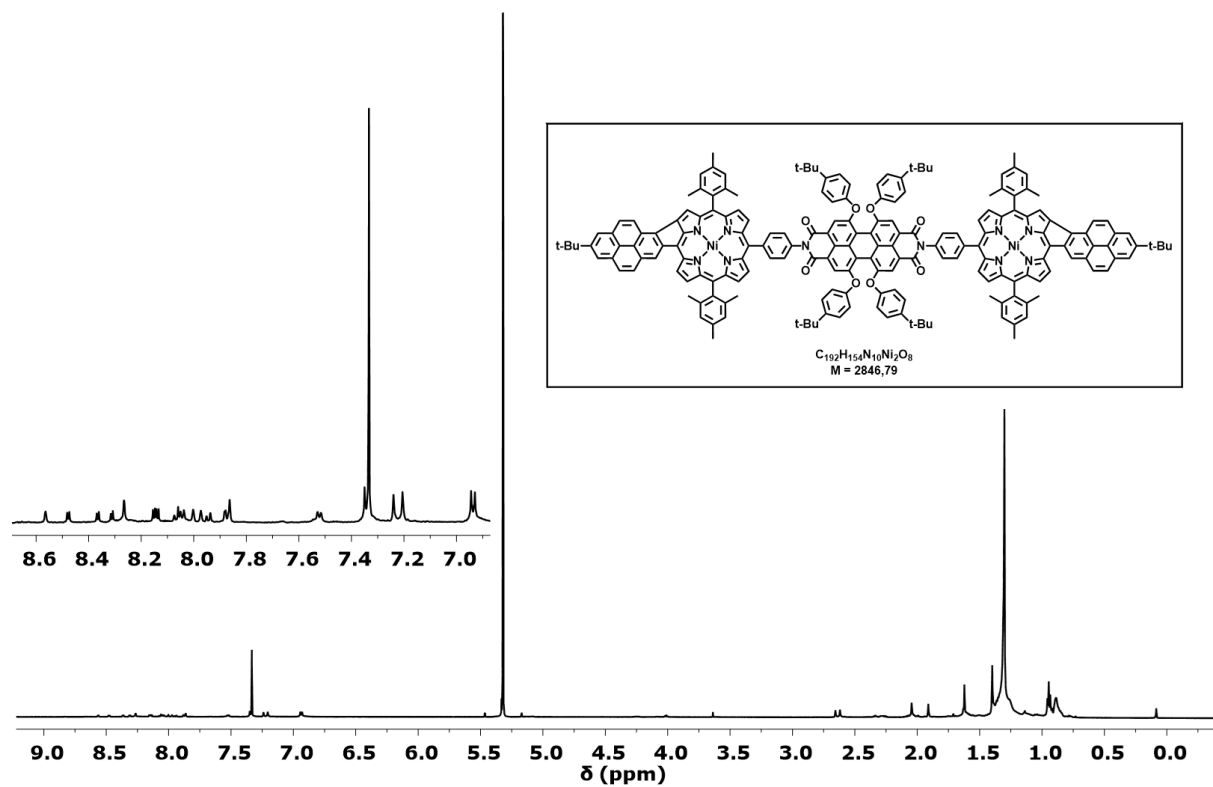

$^{13}\text{C}$  NMR - DEPTQ135 (151 MHz,  $\text{CD}_2\text{Cl}_2$ , rt)

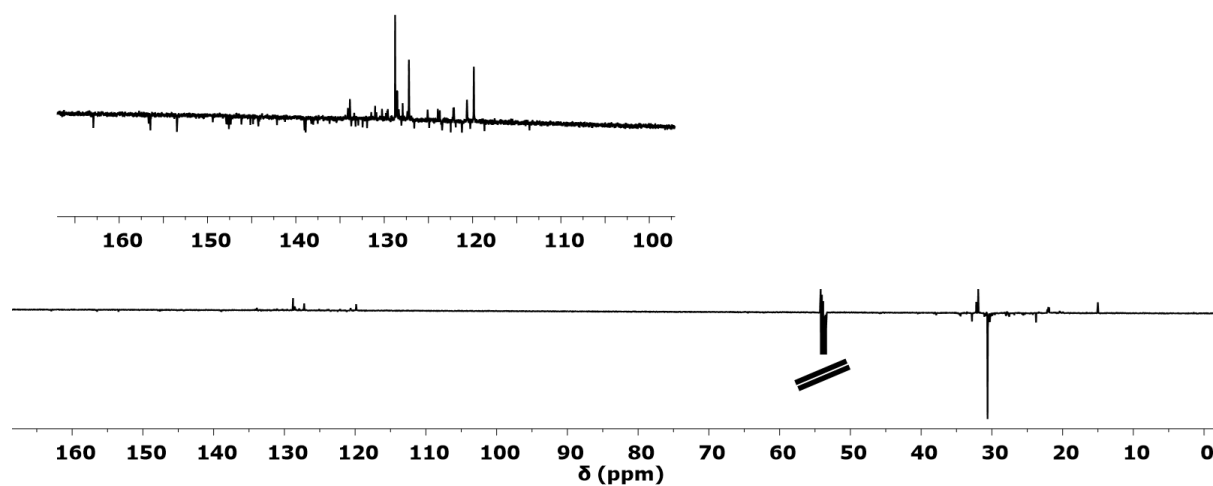

Figure S93.  $^1\text{H}$  and  $^{13}\text{C}$  NMR (DEPTQ135) of Pyr-PDI-Pyr.

$^1\text{H}$ - $^1\text{H}$  COSY (601 MHz,  $\text{CD}_2\text{Cl}_2/\text{CS}_2$ , rt)

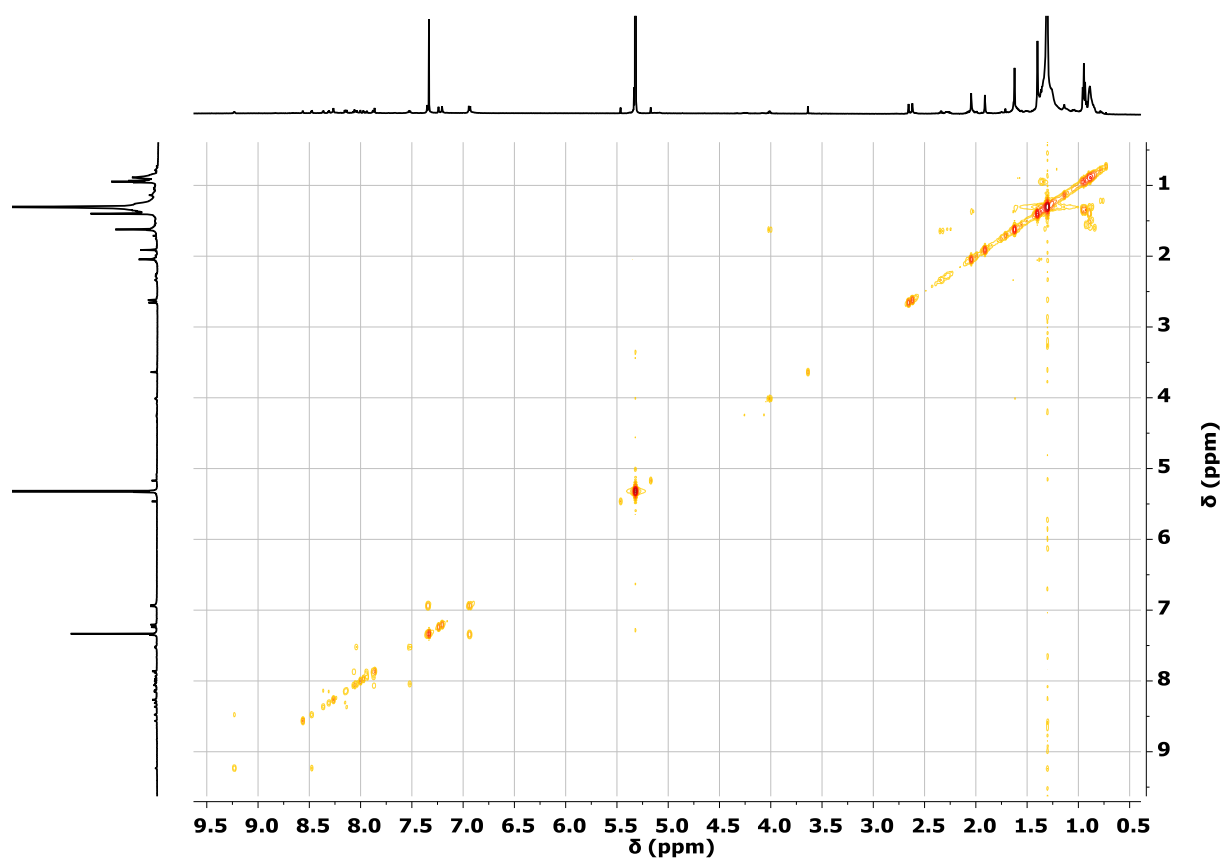

**Figure S94.**  $^1\text{H}$ - $^1\text{H}$  COSY of Pyr-PDI-Pyr.

$^1\text{H}$ - $^{13}\text{C}$  HSQC (601 MHz,  $\text{CD}_2\text{Cl}_2/\text{CS}_2$ , rt)

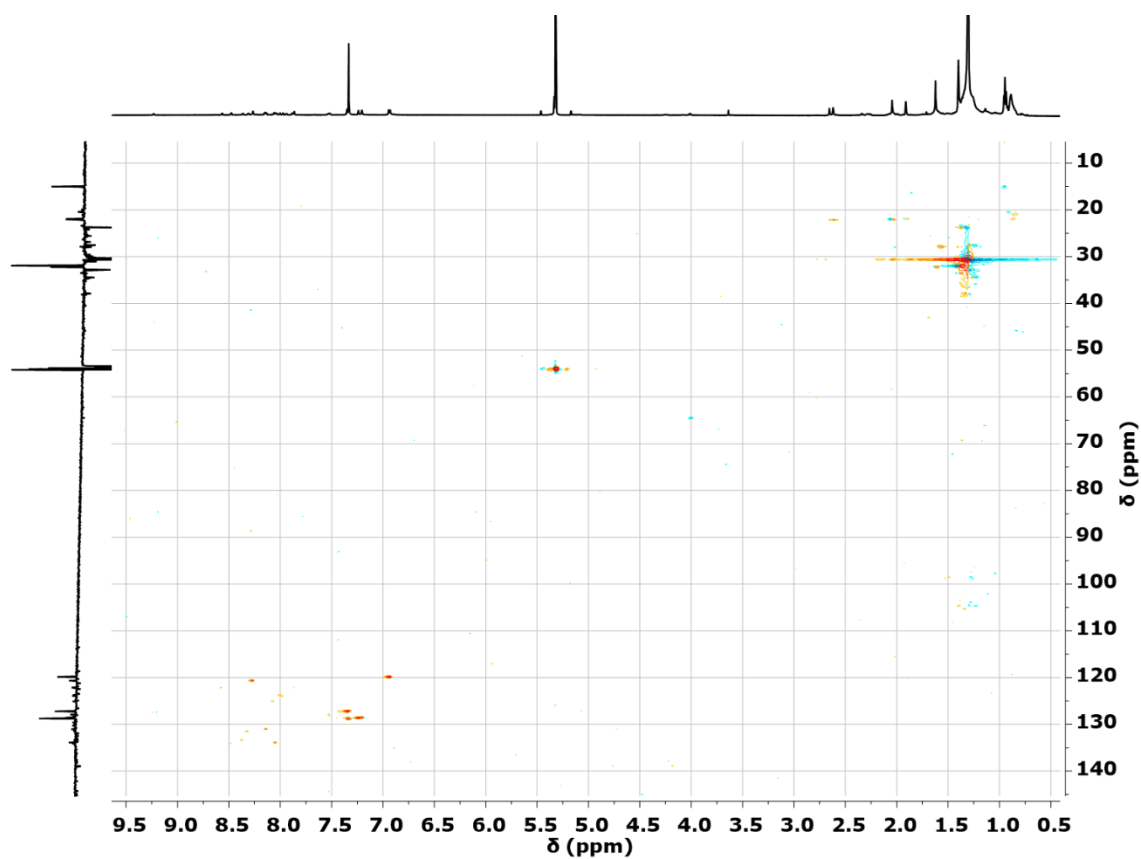

Figure S95.  $^1\text{H}$ - $^{13}\text{C}$  HSQC of Pyr-PDI-Pyr.

$^1\text{H}$ - $^{13}\text{C}$  HMBC (601 MHz,  $\text{CD}_2\text{Cl}_2/\text{CS}_2$ , rt)

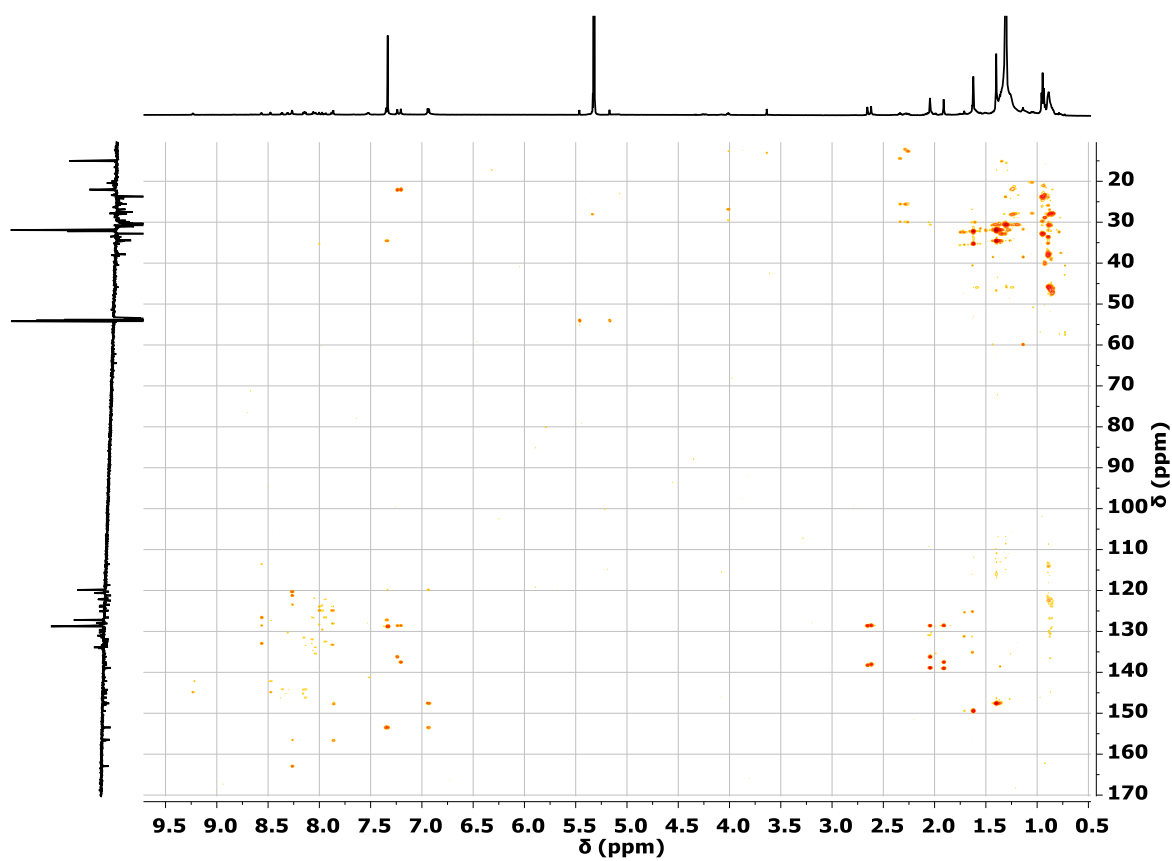

Figure S96.  $^1\text{H}$ - $^{13}\text{C}$  HMBC of Pyr-PDI-Pyr.



## MS (MALDI)

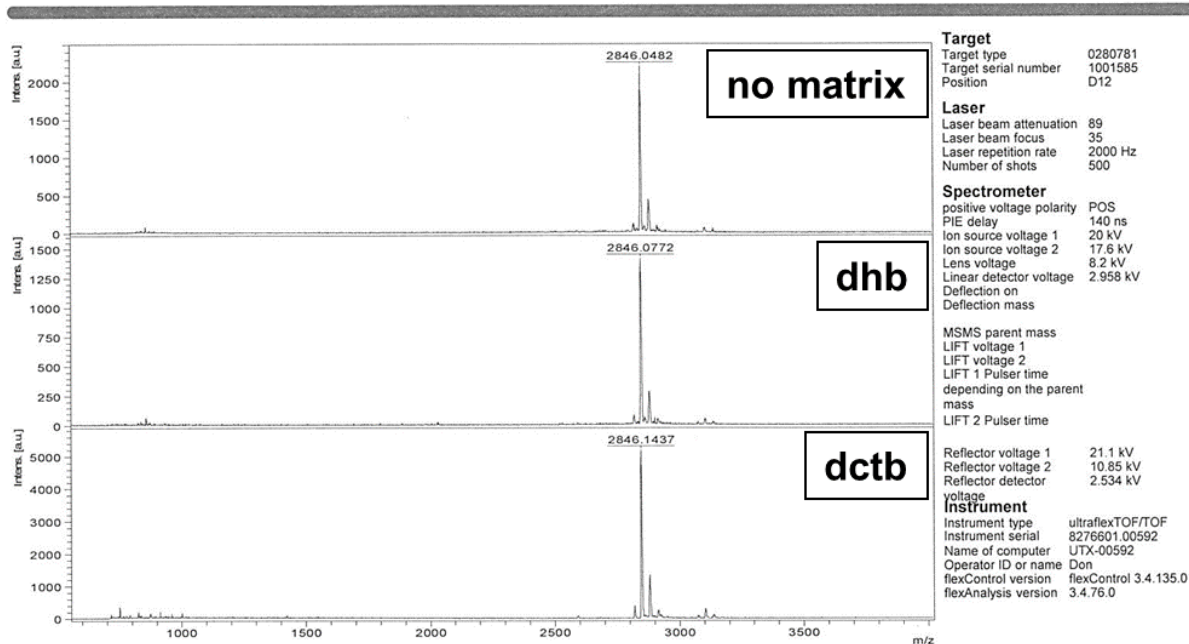

## HRMS (MALDI)

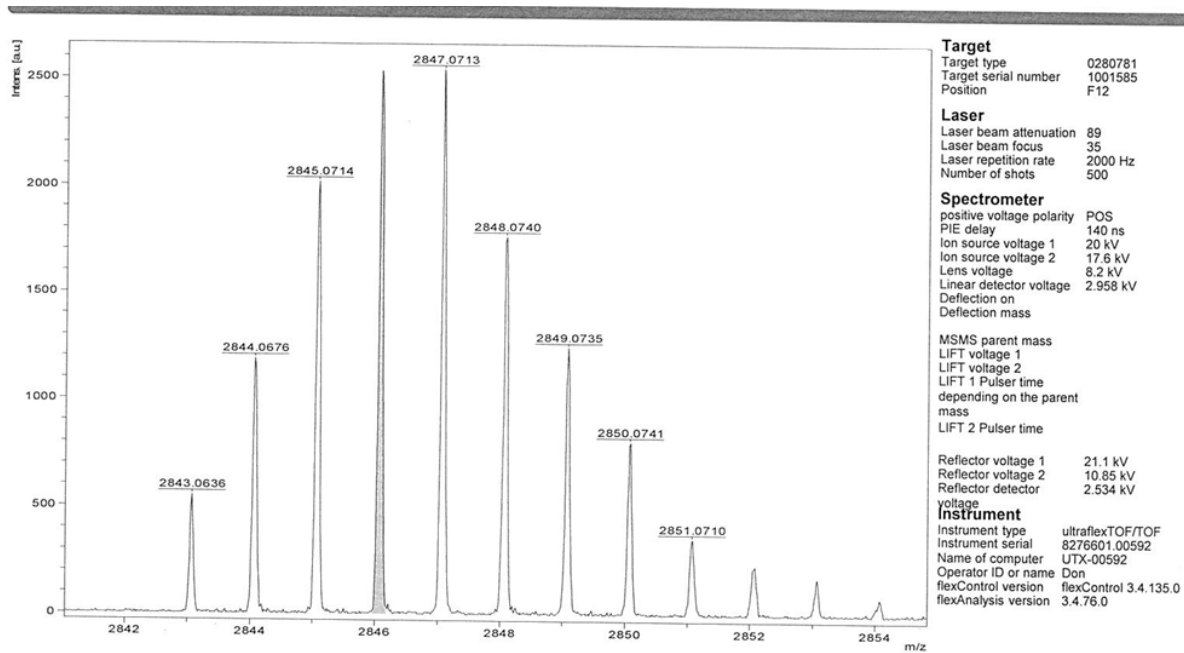

## SmartFormula

| Formula                         | Mass       | Error  | mSigma  | DbIEq  | N rule | Electron Configuration |
|---------------------------------|------------|--------|---------|--------|--------|------------------------|
| C 192 H<br>154 N 10<br>Ni 2 O 8 | 2,843.0652 | 0.5757 | 74.7957 | 121.00 | ok     | odd                    |

Figure S97. MS/HRMS (MALDI) of Pyr-PDI-Pyr.

$^1\text{H}$  NMR (601 MHz,  $\text{CD}_2\text{Cl}_2/\text{CS}_2$ , rt)

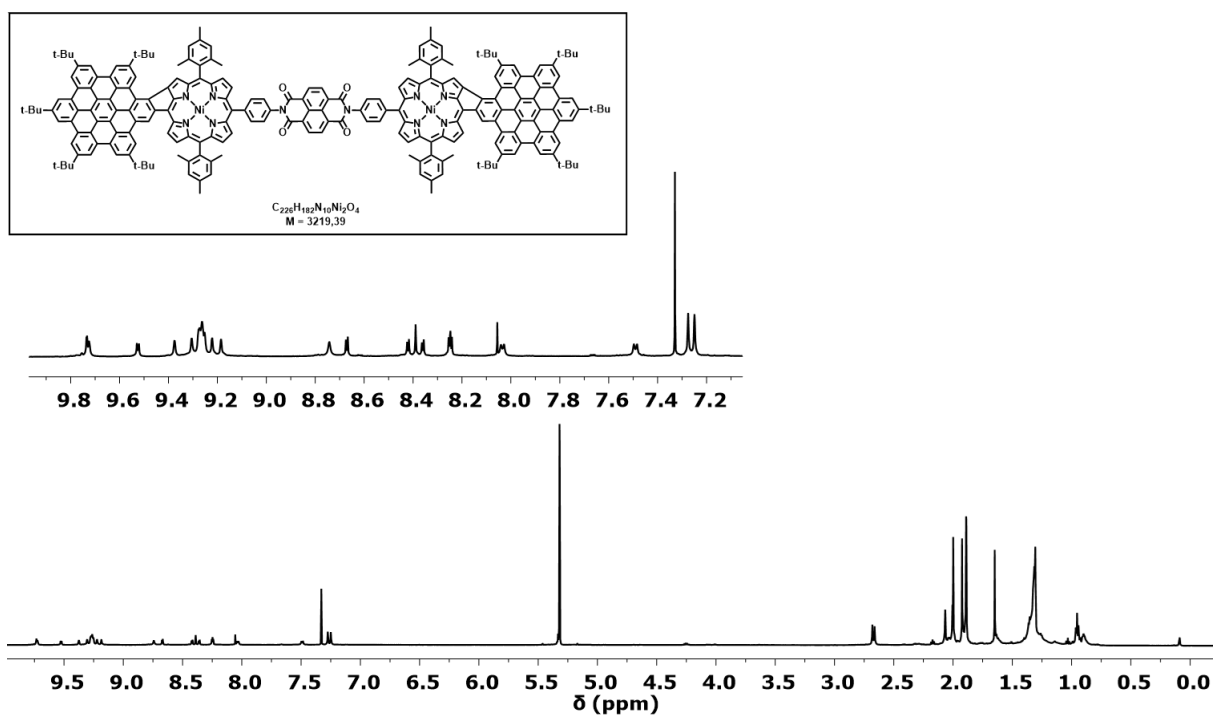

$^{13}\text{C}$  NMR - DEPTQ135 (151 MHz,  $\text{CD}_2\text{Cl}_2/\text{CS}_2$ , rt)

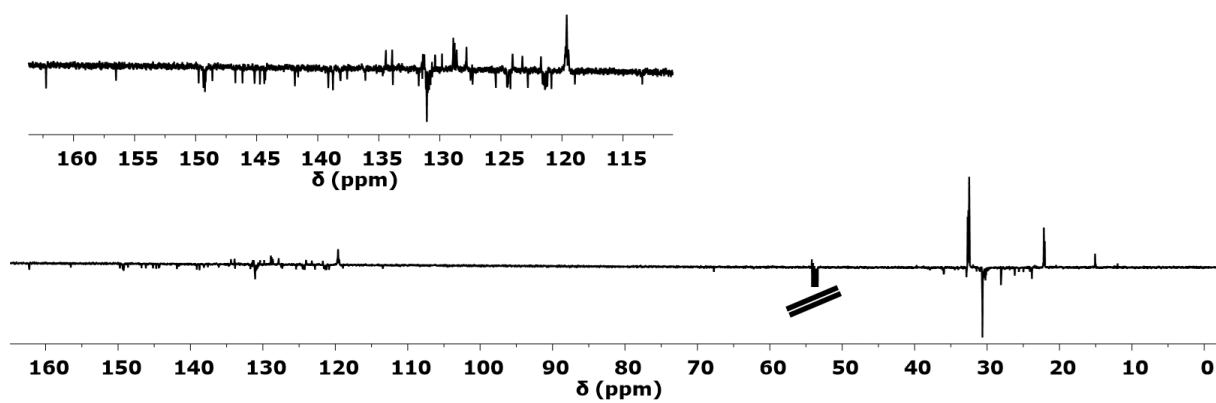

Figure S98.  $^1\text{H}$  and  $^{13}\text{C}$  NMR (DEPTQ135) of HBC-NDI-HBC.

$^1\text{H}$ - $^1\text{H}$  COSY (601 MHz,  $\text{CD}_2\text{Cl}_2/\text{CS}_2$ , rt)

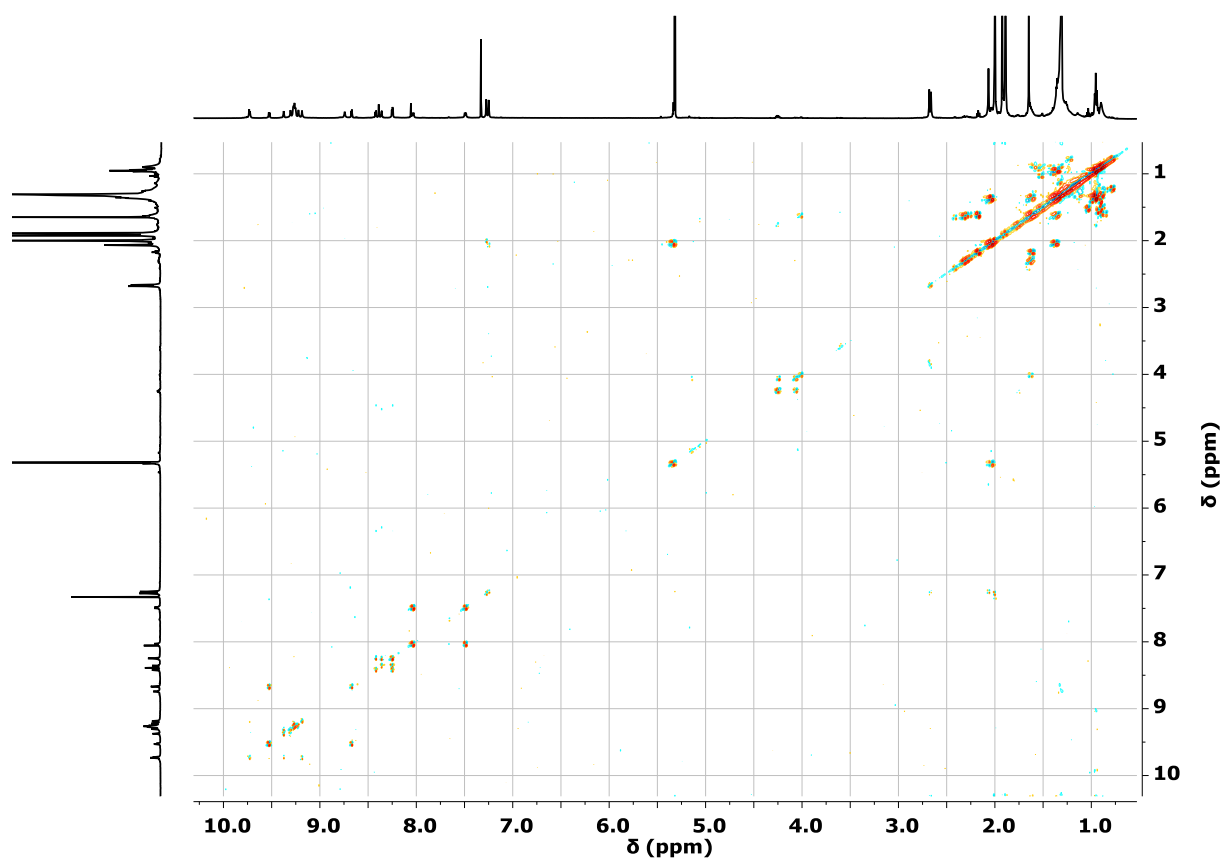

Figure S99.  $^1\text{H}$ - $^1\text{H}$  COSY of HBC-NDI-HBC.

$^1\text{H}$ - $^{13}\text{C}$  HSQC (601 MHz,  $\text{CD}_2\text{Cl}_2/\text{CS}_2$ , rt)

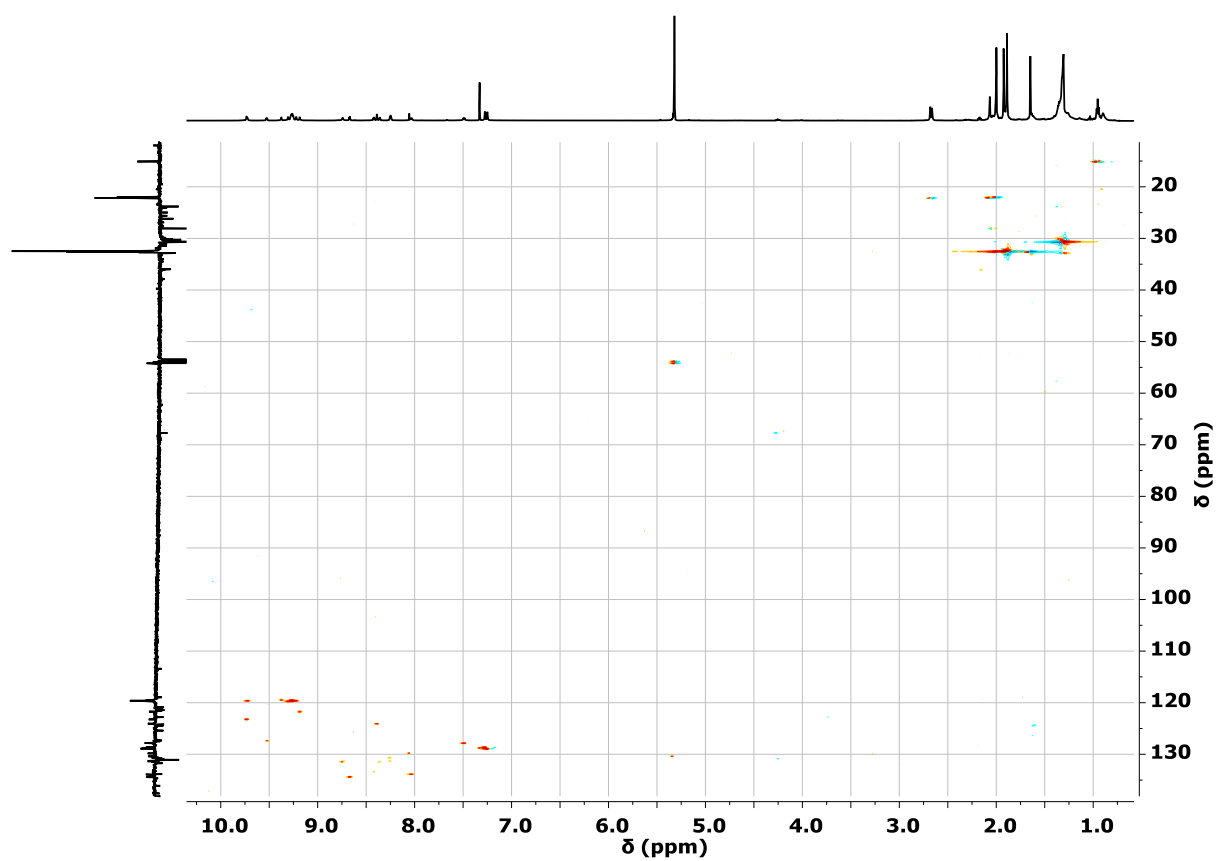

Figure S100.  $^1\text{H}$ - $^{13}\text{C}$  HSQC of HBC-NDI-HBC.

$^1\text{H}$ - $^{13}\text{C}$  HMBC (601 MHz,  $\text{CD}_2\text{Cl}_2/\text{CS}_2$ , rt)

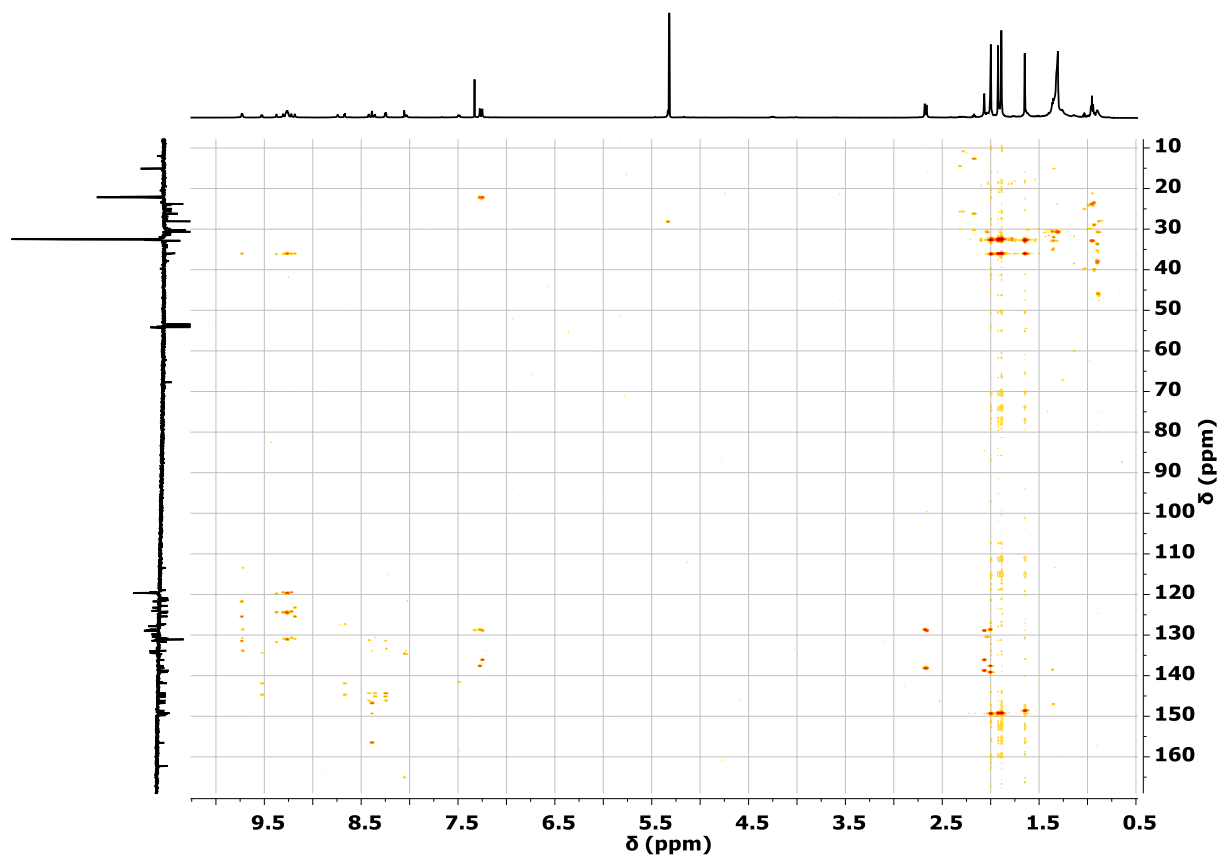

Figure S101.  $^1\text{H}$ - $^{13}\text{C}$  HMBC of HBC-NDI-HBC.

$^1\text{H}$ - $^1\text{H}$  ROESY (601 MHz,  $\text{CD}_2\text{Cl}_2/\text{CS}_2$ , rt)

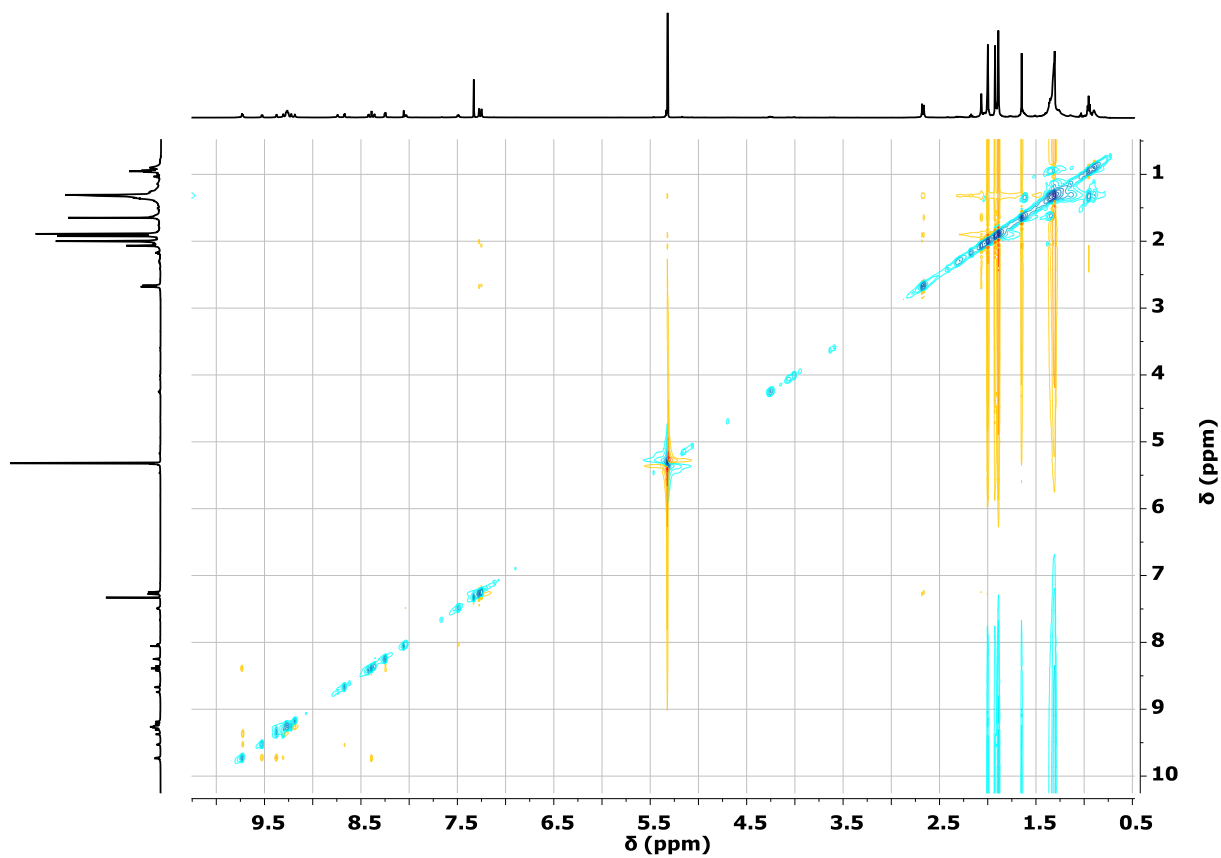

**Figure S102.**  $^1\text{H}$ - $^1\text{H}$  ROESY of HBC-NDI-HBC.

## MS (MALDI)

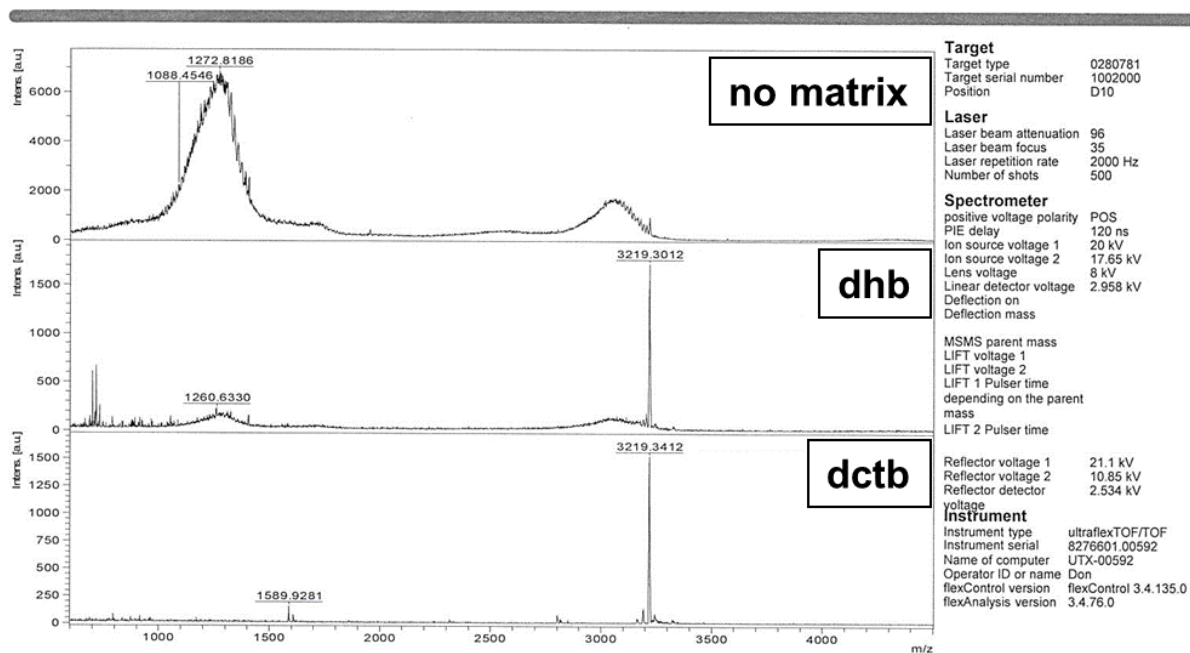

## HRMS (MALDI)

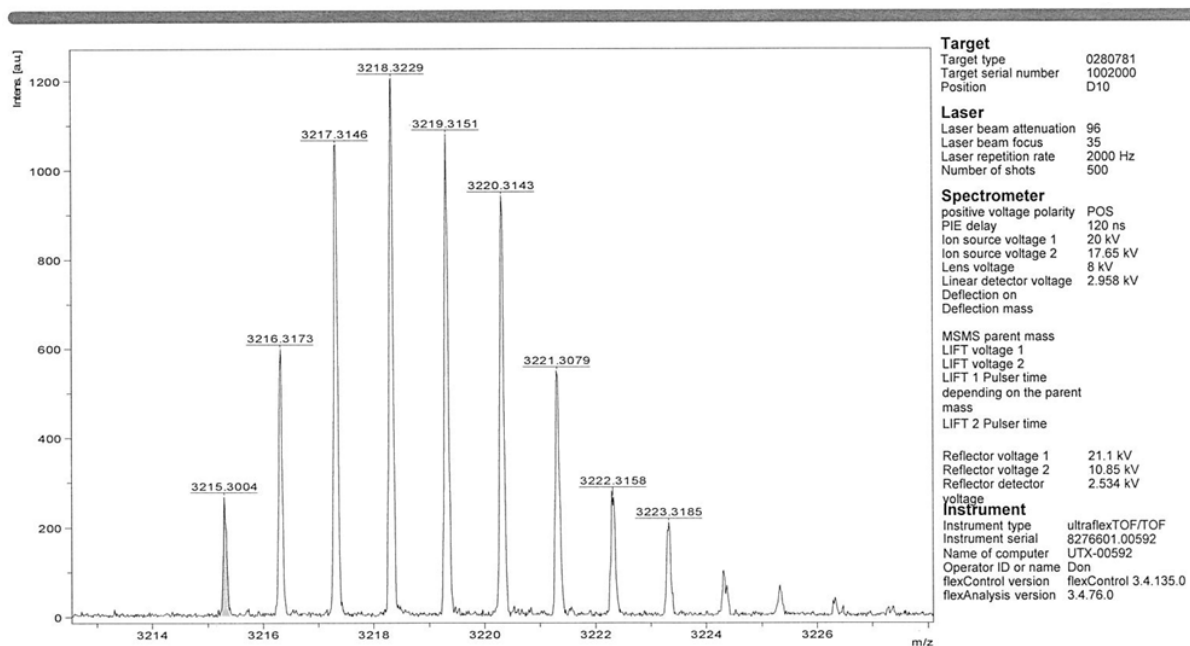

### SmartFormula

| Formula                         | Mass       | Error  | mSigma  | DblEq  | N rule | Electron Configuration |
|---------------------------------|------------|--------|---------|--------|--------|------------------------|
| C 226 H<br>182 N 10<br>Ni 2 O 4 | 3,215.3047 | 1.3372 | 66.1907 | 141.00 | ok     | odd                    |

Figure S103. MS/HRMS (MALDI) of HBC-NDI-HBC.

$^1\text{H}$  NMR (601 MHz,  $\text{CD}_2\text{Cl}_2/\text{CS}_2$ , rt)

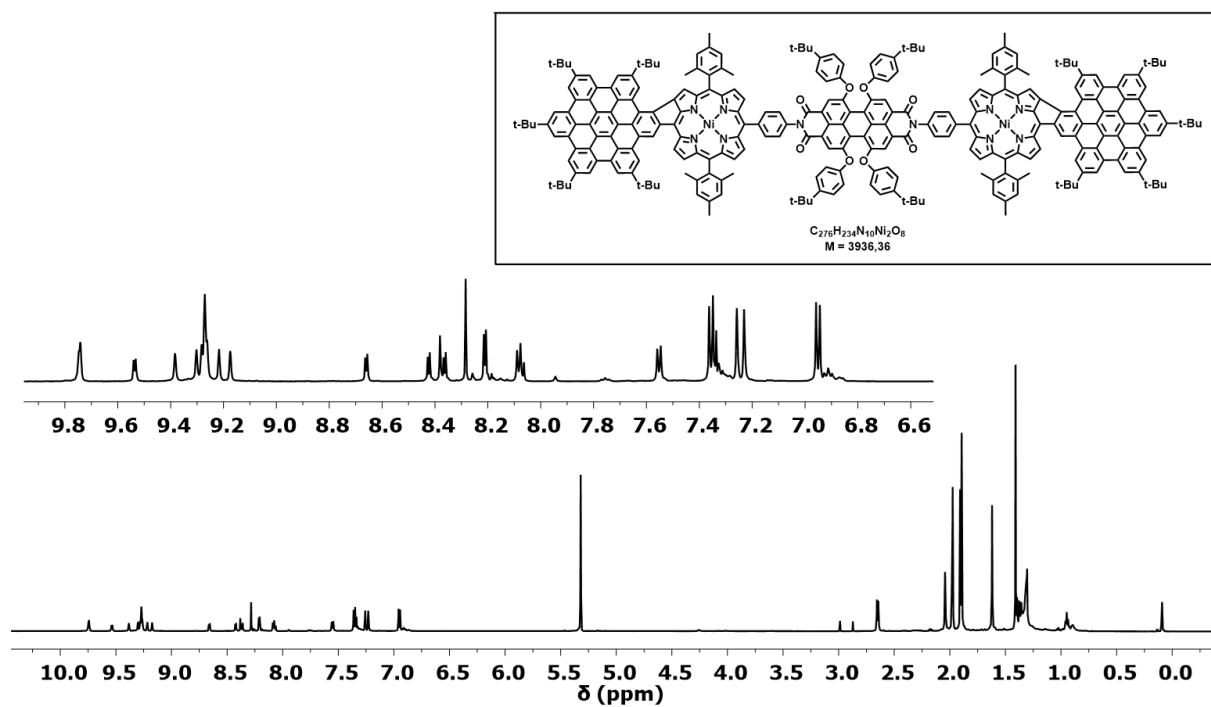

$^{13}\text{C}$  NMR - DEPTQ135 (151 MHz,  $\text{CD}_2\text{Cl}_2/\text{CS}_2$ , rt)

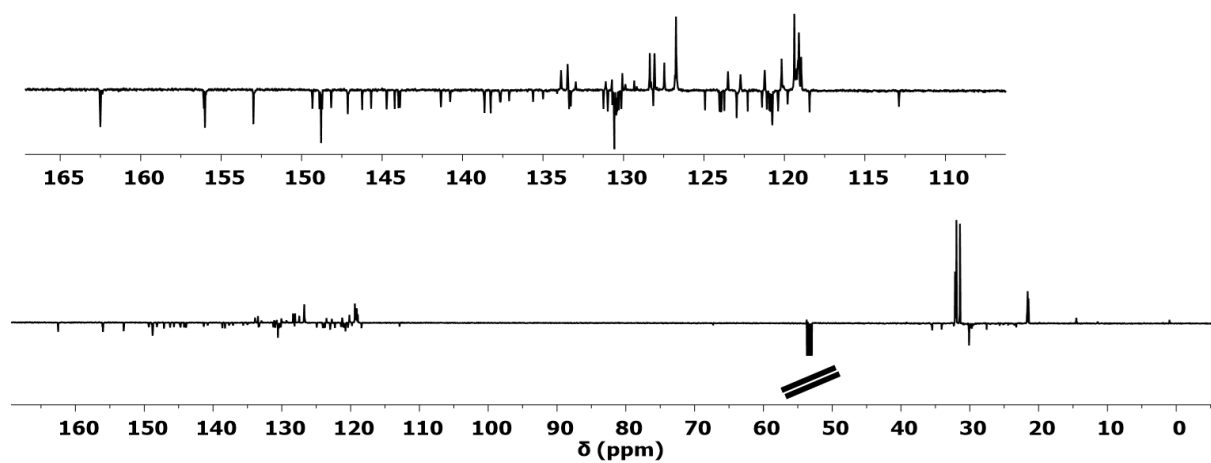

Figure S104.  $^1\text{H}$  and  $^{13}\text{C}$  NMR (DEPTQ135) of HBC-PDI-HBC.



$^1\text{H}$ - $^1\text{H}$  COSY (601 MHz,  $\text{CD}_2\text{Cl}_2/\text{CS}_2$ , rt)

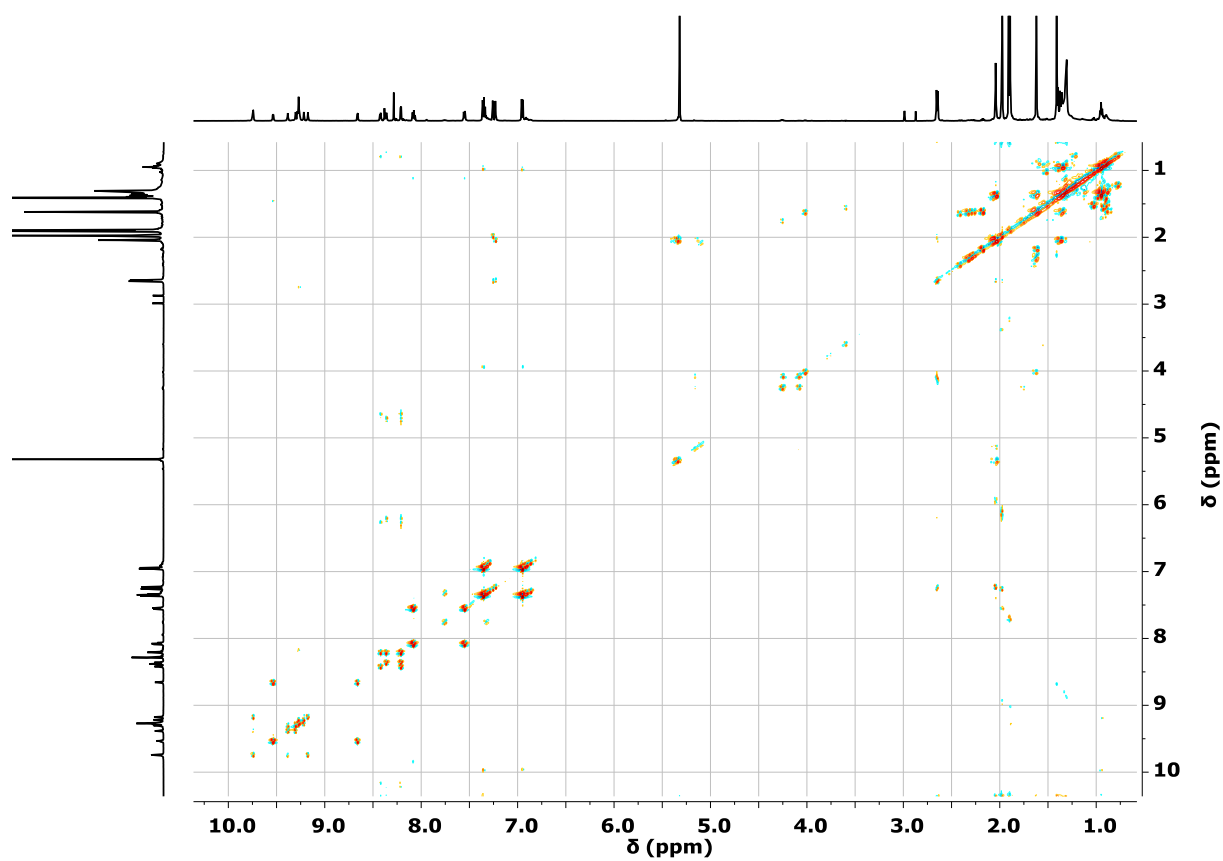

Figure S105.  $^1\text{H}$ - $^1\text{H}$  COSY of HBC-PDI-HBC.

$^1\text{H}$ - $^{13}\text{C}$  HSQC (601 MHz,  $\text{CD}_2\text{Cl}_2/\text{CS}_2$ , rt)



Figure S106.  $^1\text{H}$ - $^{13}\text{C}$  HSQC of HBC-PDI-HBC.

$^1\text{H}$ - $^{13}\text{C}$  HMBC (601 MHz,  $\text{CD}_2\text{Cl}_2/\text{CS}_2$ , rt)

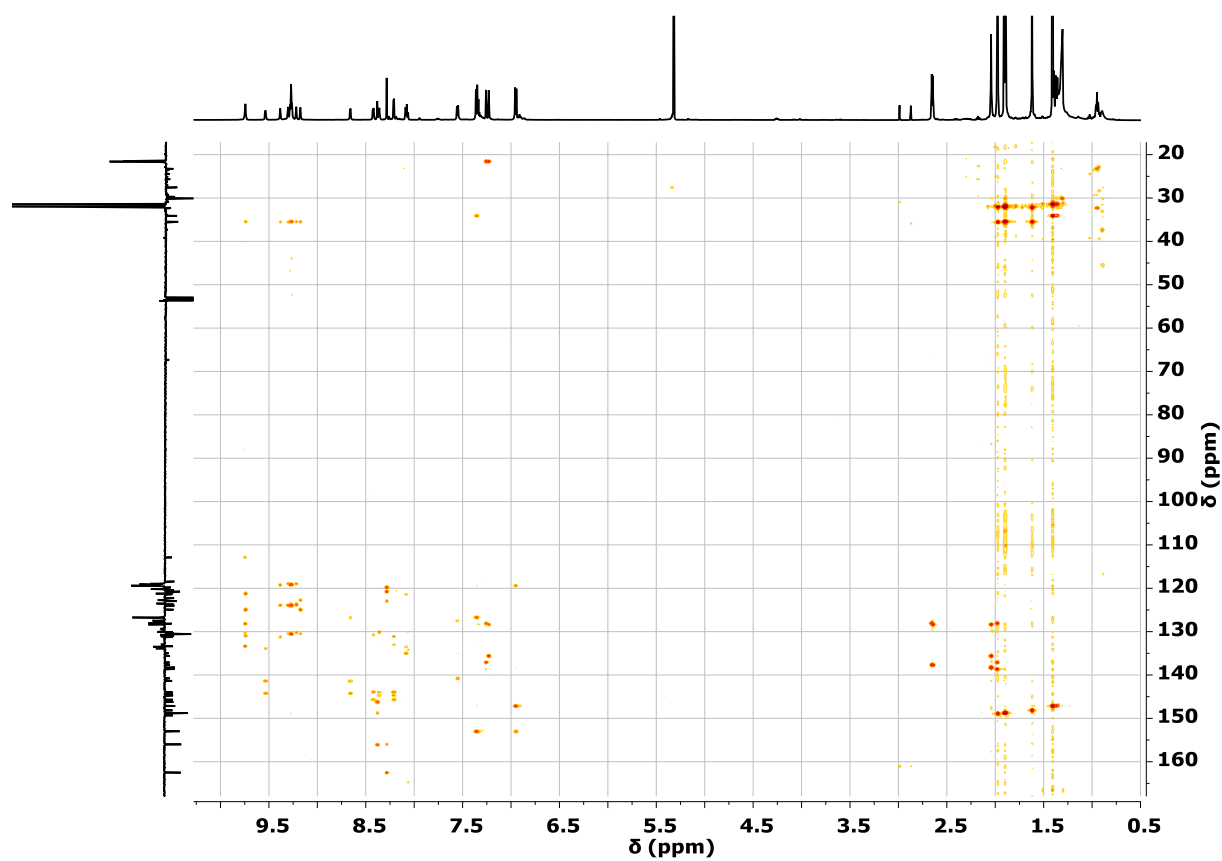

Figure S108.  $^1\text{H}$ - $^{13}\text{C}$  HMBC of HBC-PDI-HBC.

$^1\text{H}$ - $^1\text{H}$  ROESY (601 MHz,  $\text{CD}_2\text{Cl}_2/\text{CS}_2$ , rt)

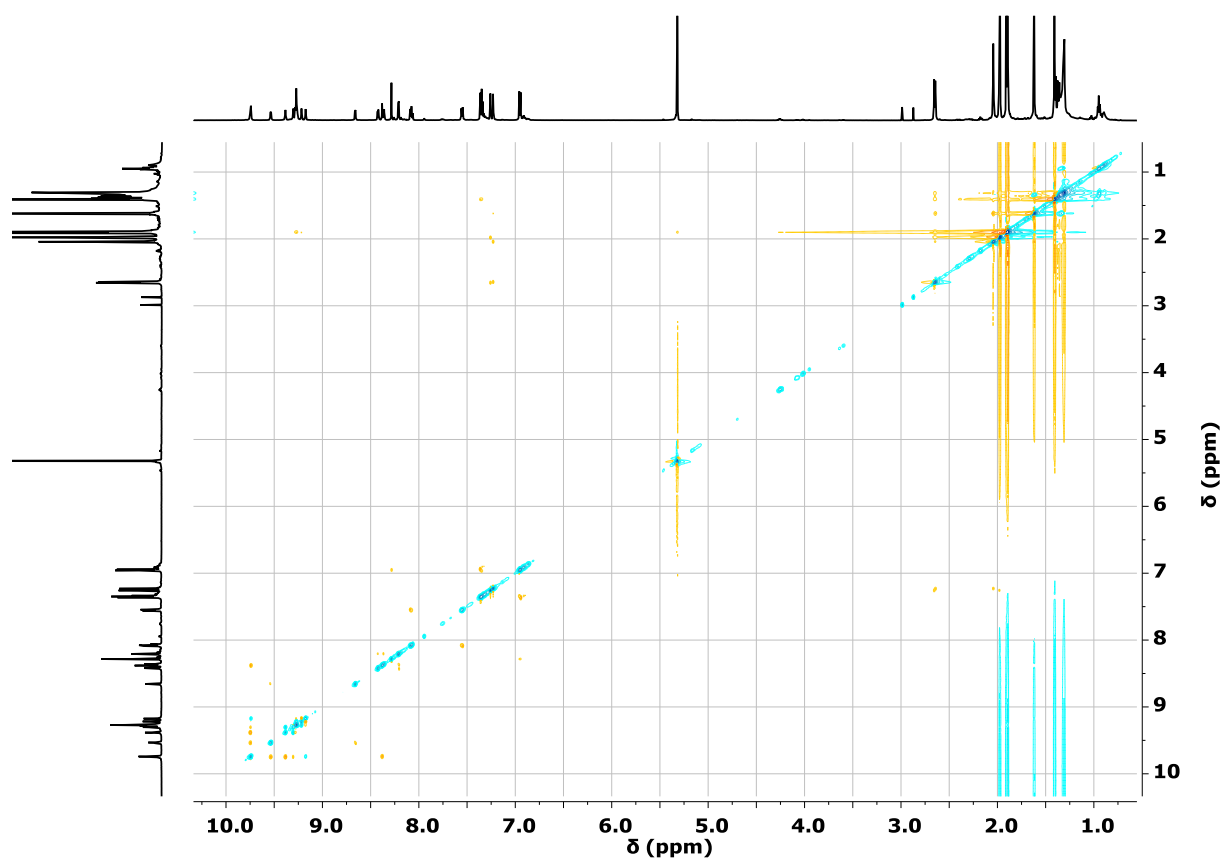

Figure S109.  $^1\text{H}$ - $^1\text{H}$  ROESY of HBC-PDI-HBC.

## MS (MALDI)

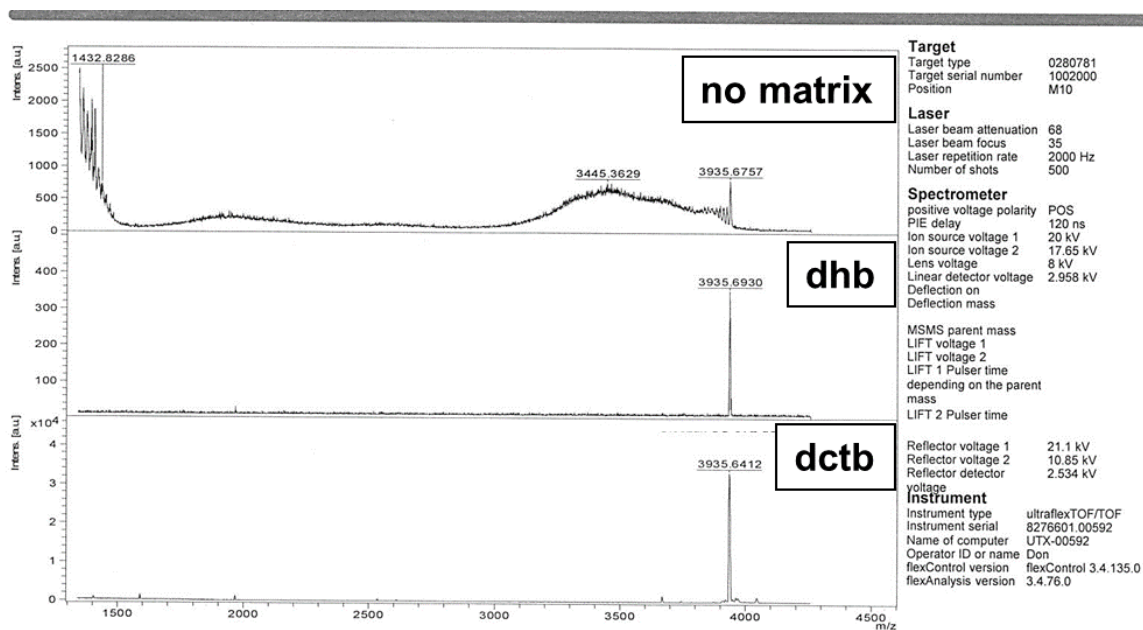

## HRMS (MALDI)

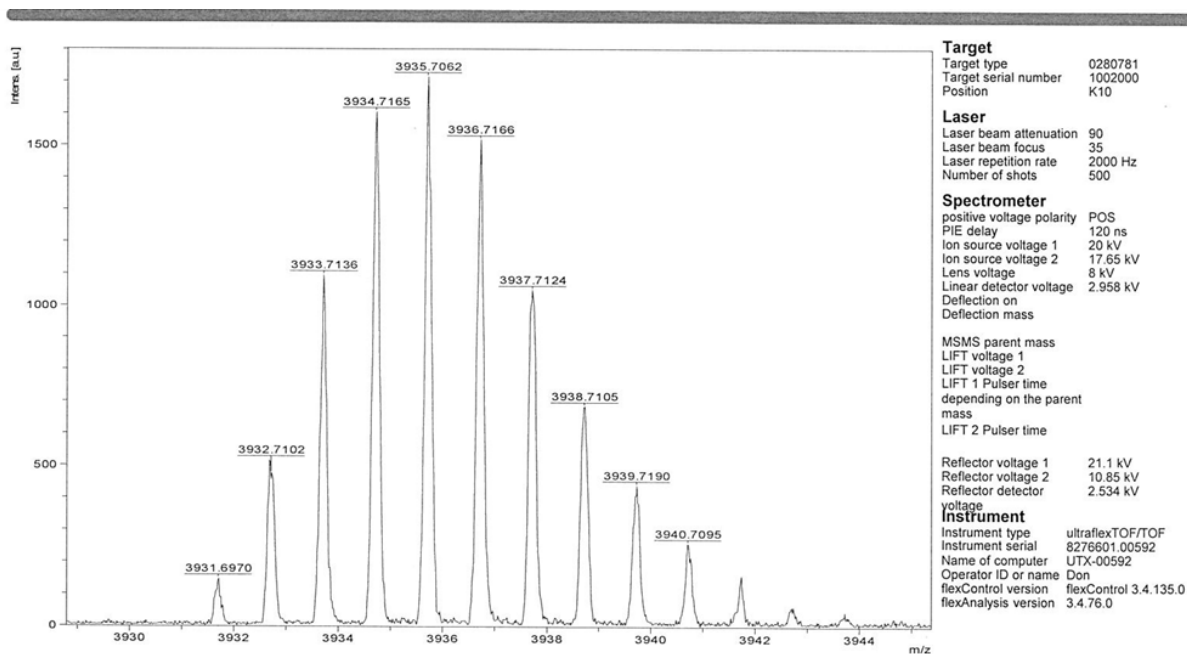

## SmartFormula

| Formula                         | Mass       | Error  | mSigma  | DbIEq  | N rule | Electron Configuration |
|---------------------------------|------------|--------|---------|--------|--------|------------------------|
| C 276 H<br>234 N 10<br>Ni 2 O 8 | 3,931.6913 | 1.4695 | 66.4858 | 165.00 | ok     | odd                    |

Figure S110. MS/HRMS (MALDI) of HBC-PDI-HBC.

## UV/Vis Absorptions of the Key Precursors

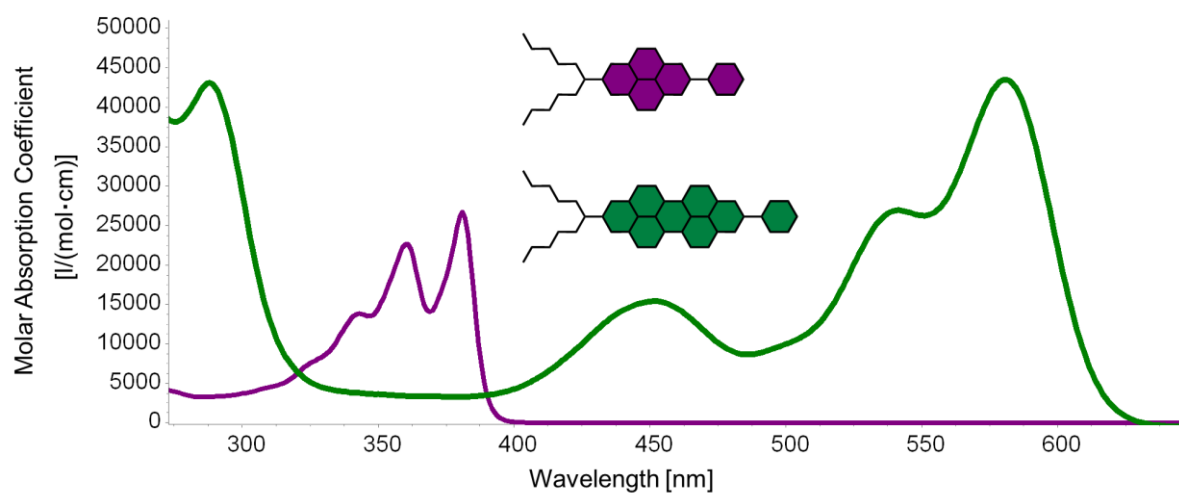

**Figure S111.** UV/Vis absorptions of I-NDI (purple) and I-PDI (green). Solvent: CH<sub>2</sub>Cl<sub>2</sub>

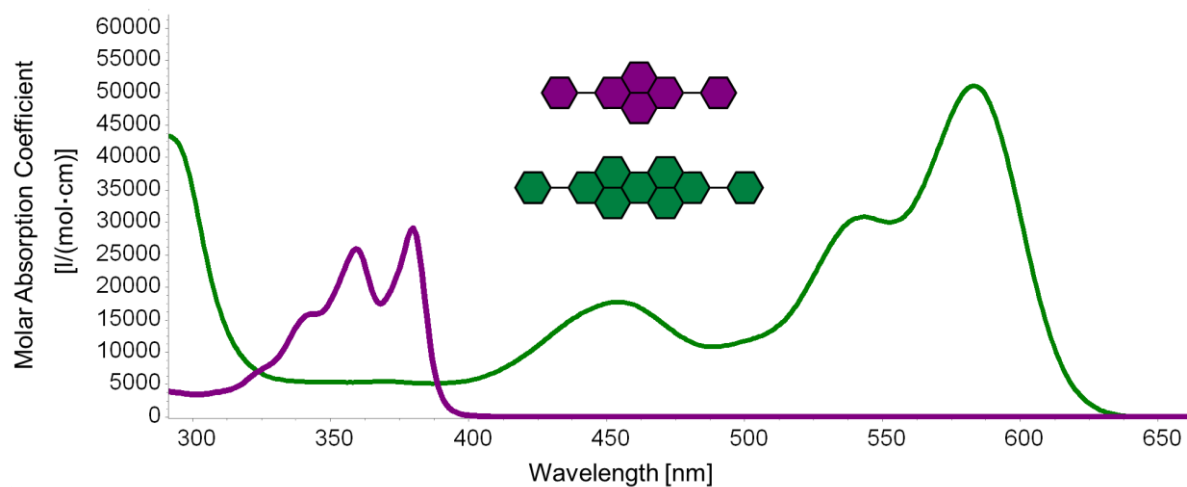

**Figure S112.** UV/Vis absorptions of I-NDI-I (purple) and I-PDI-I (green). Solvent: CH<sub>2</sub>Cl<sub>2</sub>

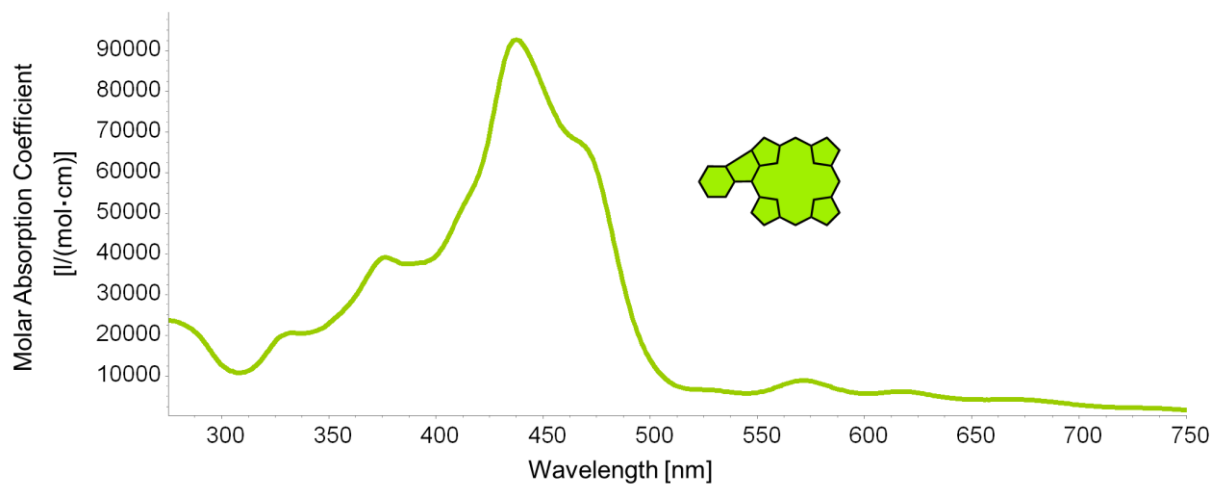

**Figure S113.** UV/Vis absorption of **PhBpin**. Solvent:  $\text{CH}_2\text{Cl}_2$

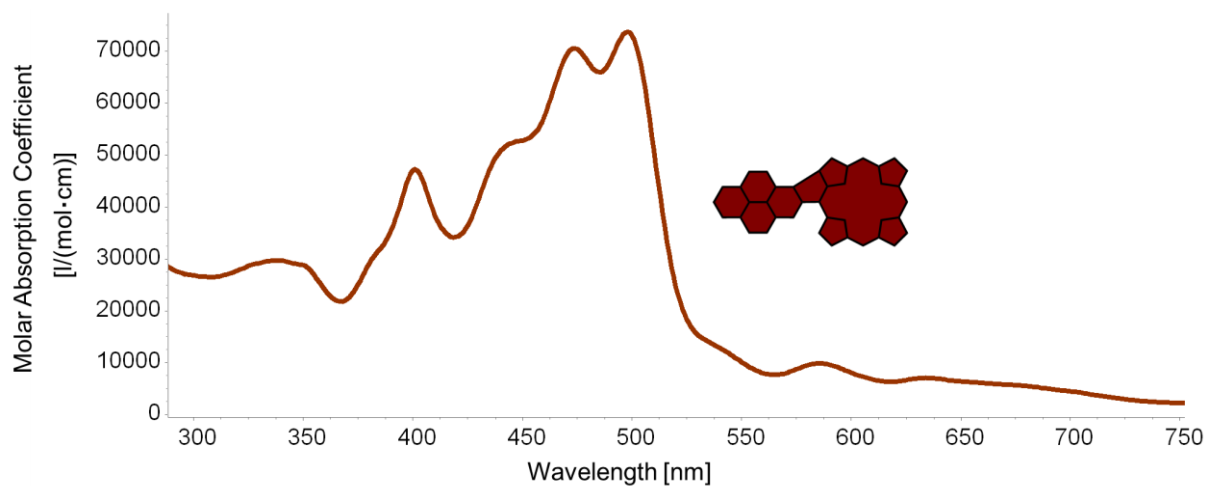

**Figure S114.** UV/Vis absorption of **PyrBpin**. Solvent:  $\text{CH}_2\text{Cl}_2$

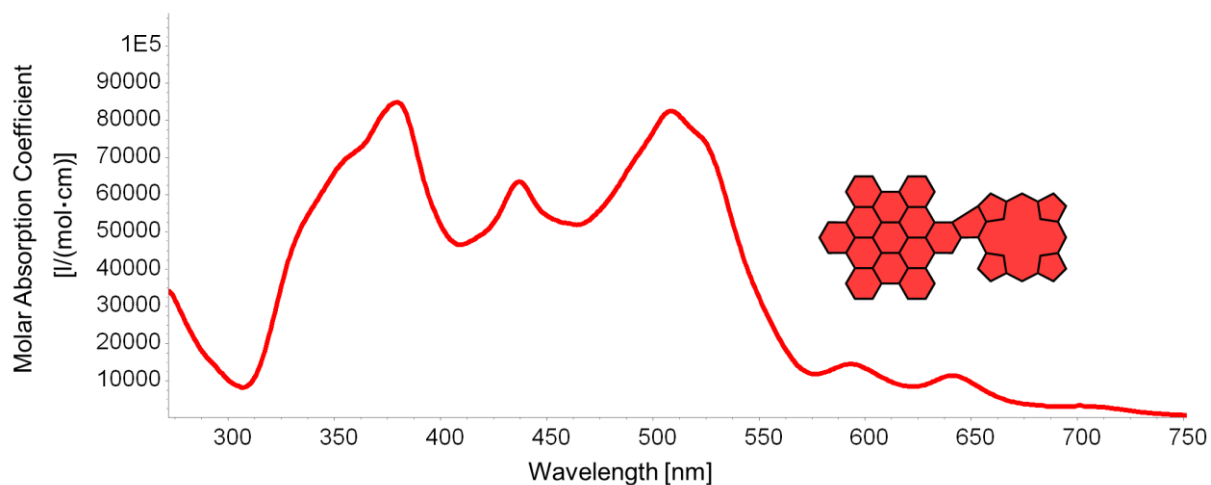

**Figure S115.** UV/Vis absorption of **HCBpin**. Solvent:  $\text{CH}_2\text{Cl}_2$

## 4 DFT Calculations

Geometries were relaxed using density-functional theory (DFT). The calculations were carried out with the plane-wave code PWScf of the Quantum Espresso software package,<sup>[10]</sup> utilizing the gradient-corrected Perdew-Burke-Ernzerhof (PBE) exchange-correlation functional,<sup>[11]</sup> Grimme D3 dispersion correction with Becke-Johnson damping,<sup>[12,13]</sup> Vanderbilt ultrasoft pseudopotentials,<sup>[14]</sup> and a plane-wave basis set with a kinetic energy cutoff of 30 Ry. Structures were assumed to be relaxed when a force convergence threshold of 5 meV/Å was reached.

Electronic properties were determined with the ORCA code,<sup>[15]</sup> using the B3LYP hybrid exchange-correlation functional,<sup>[16,17]</sup> the triple-zeta def2-TZVPP basis set,<sup>[18]</sup> and the RIJCOSX approximation with def2/J auxiliary basis functions.<sup>[19]</sup> Solvation effects in DCM were taken into account by employing the implicit conductor-like continuum polarization model (C-PCM).<sup>[15]</sup>



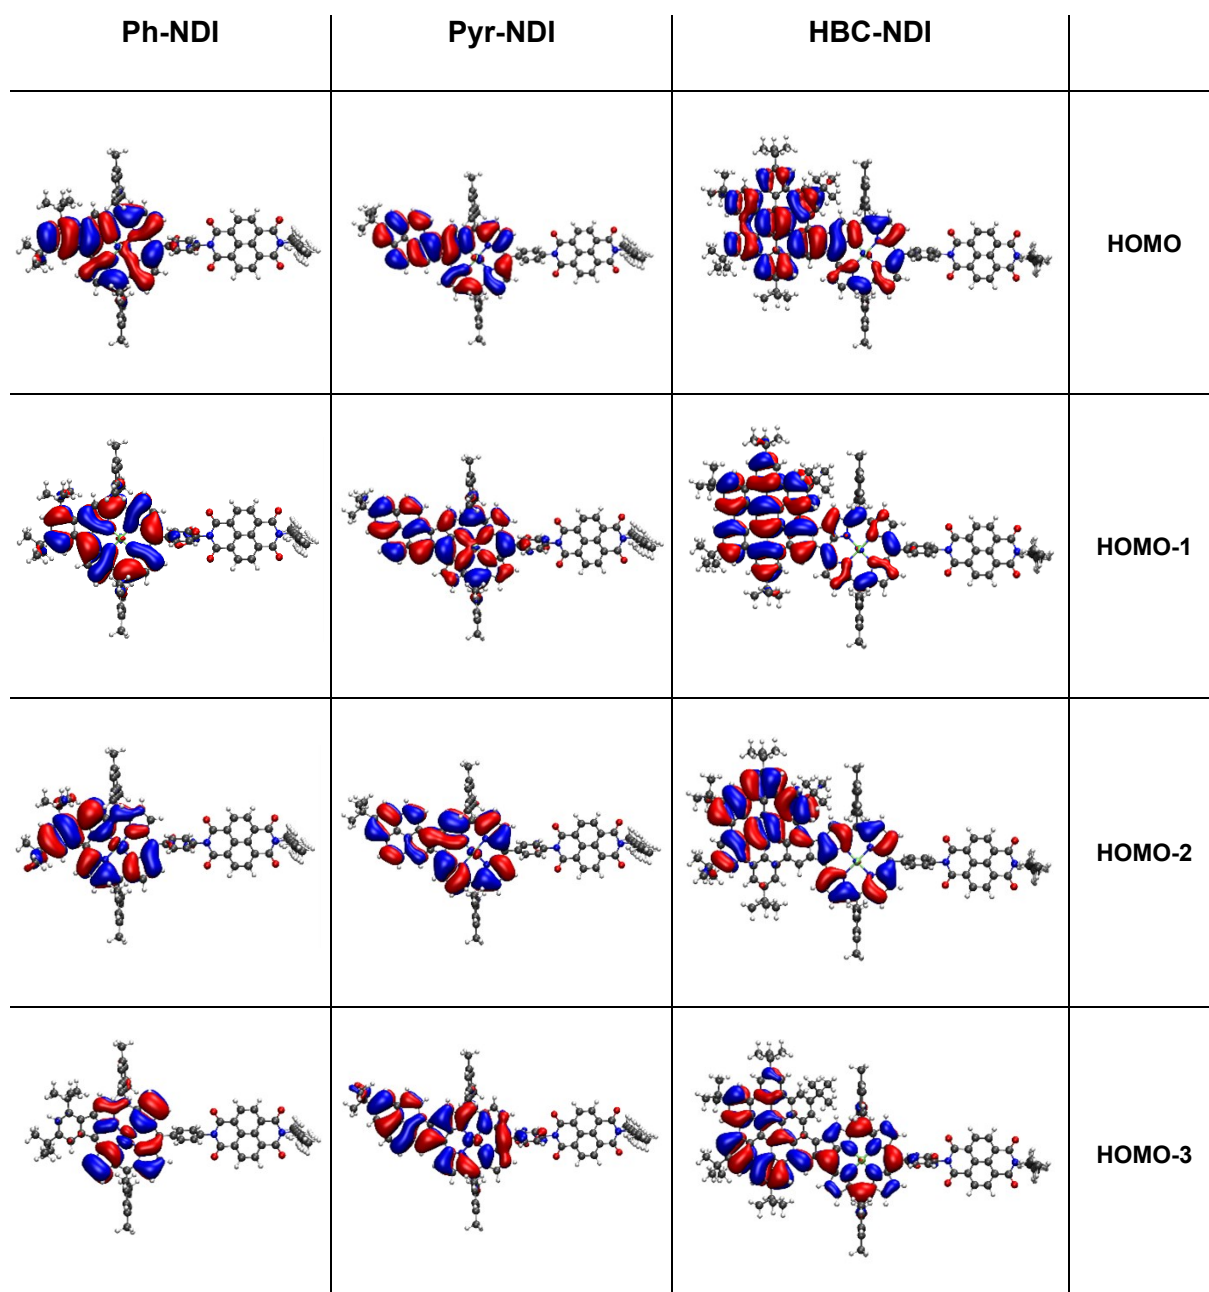

**Figure S116.** Geometry optimized structures and orbitals of **Ph-NDI**, **Pyr-NDI**, and **HBC-NDI**.

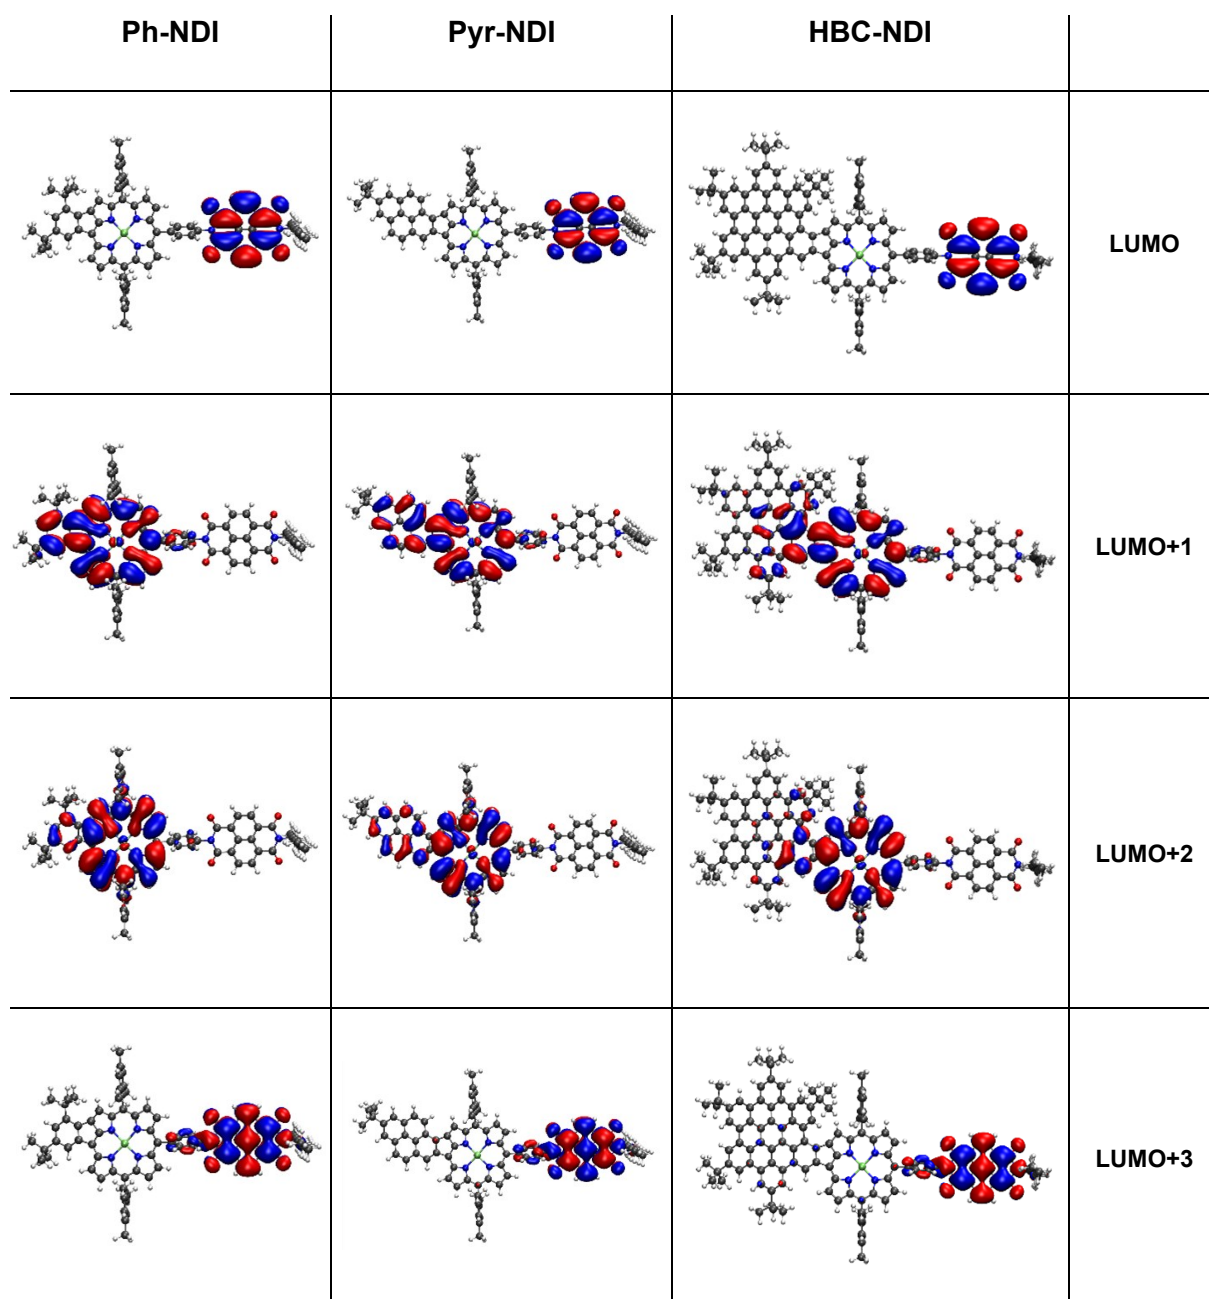

Figure S117. Geometry optimized structures and orbitals of Ph-NDI, Pyr-NDI, and HBC-NDI.

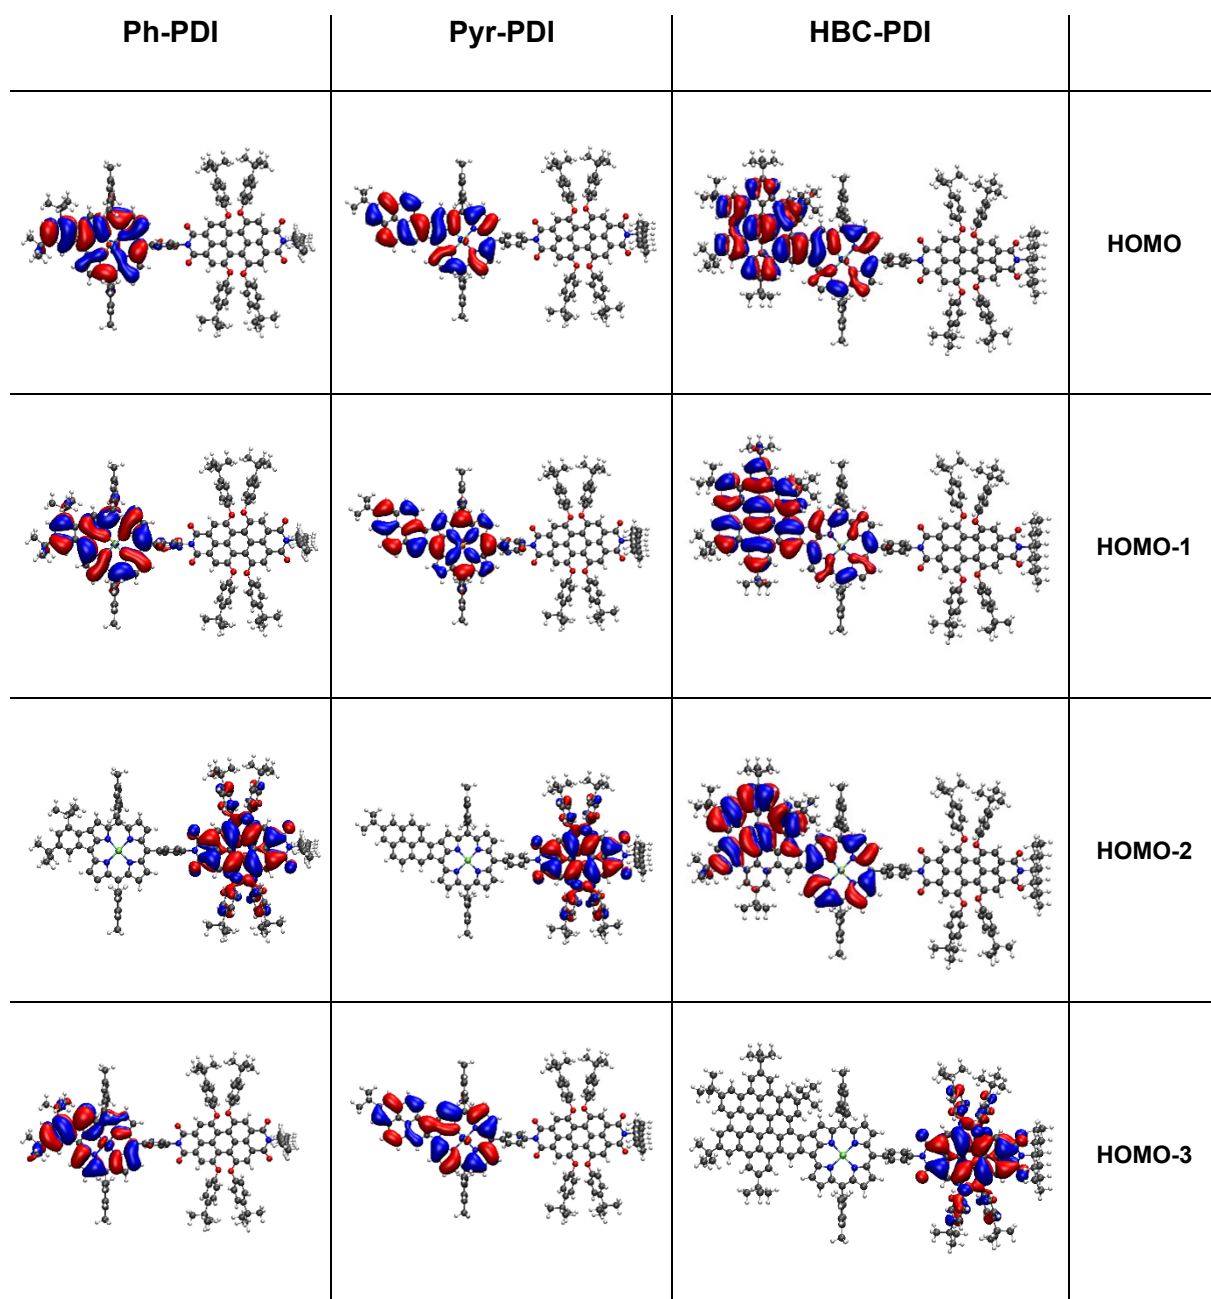

Figure S118. Geometry optimized structures and orbitals of Ph-PDI, Pyr-PDI, and HBC-PDI.

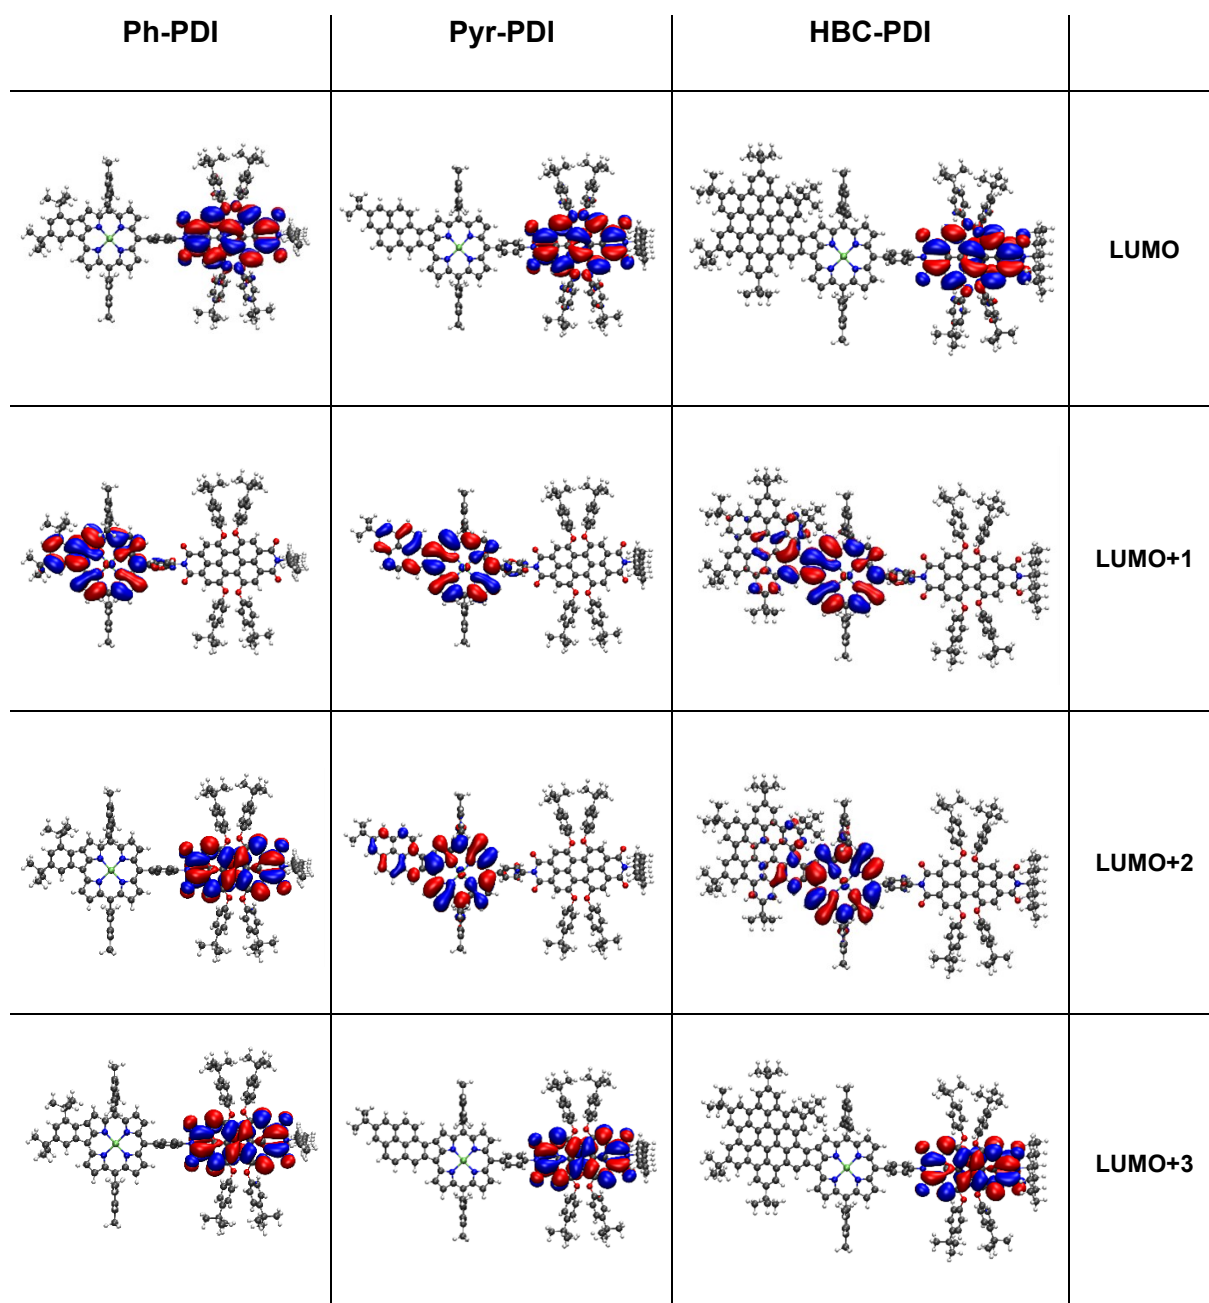

**Figure S119.** Geometry optimized structures and orbitals of **Ph-PDI**, **Pyr-PDI**, and **HBC-PDI**.

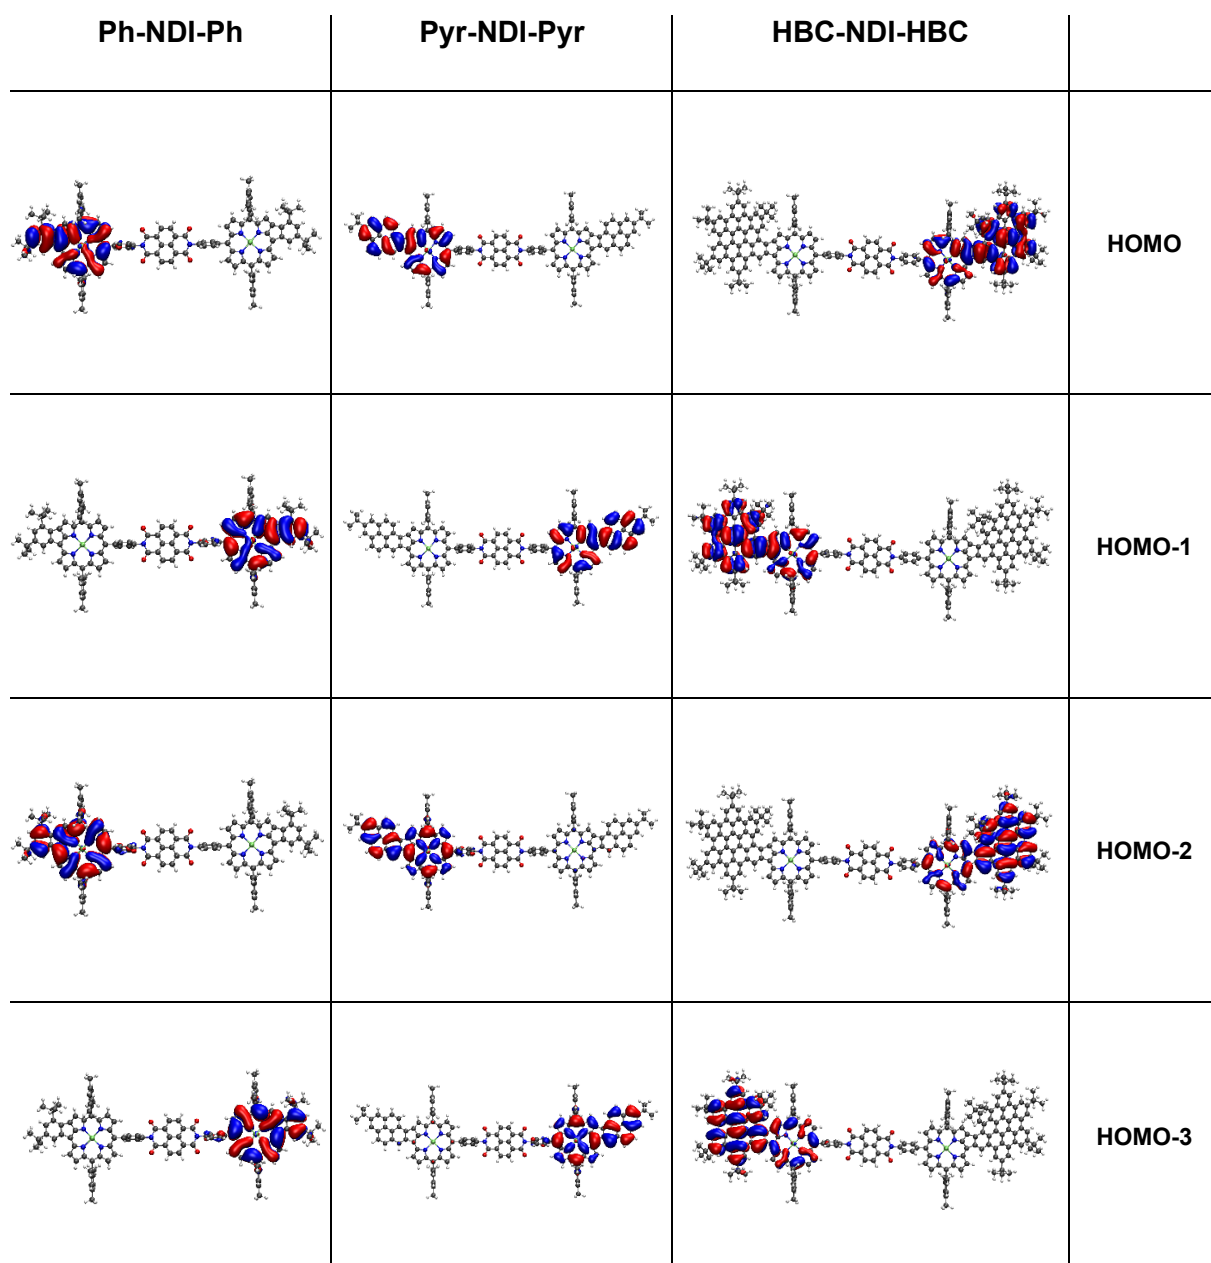

**Figure S120.** Geometry optimized structures and orbitals of **Ph-NDI-Ph**, **Pyr-NDI-Pyr**, and **HBC-NDI-HBC**.

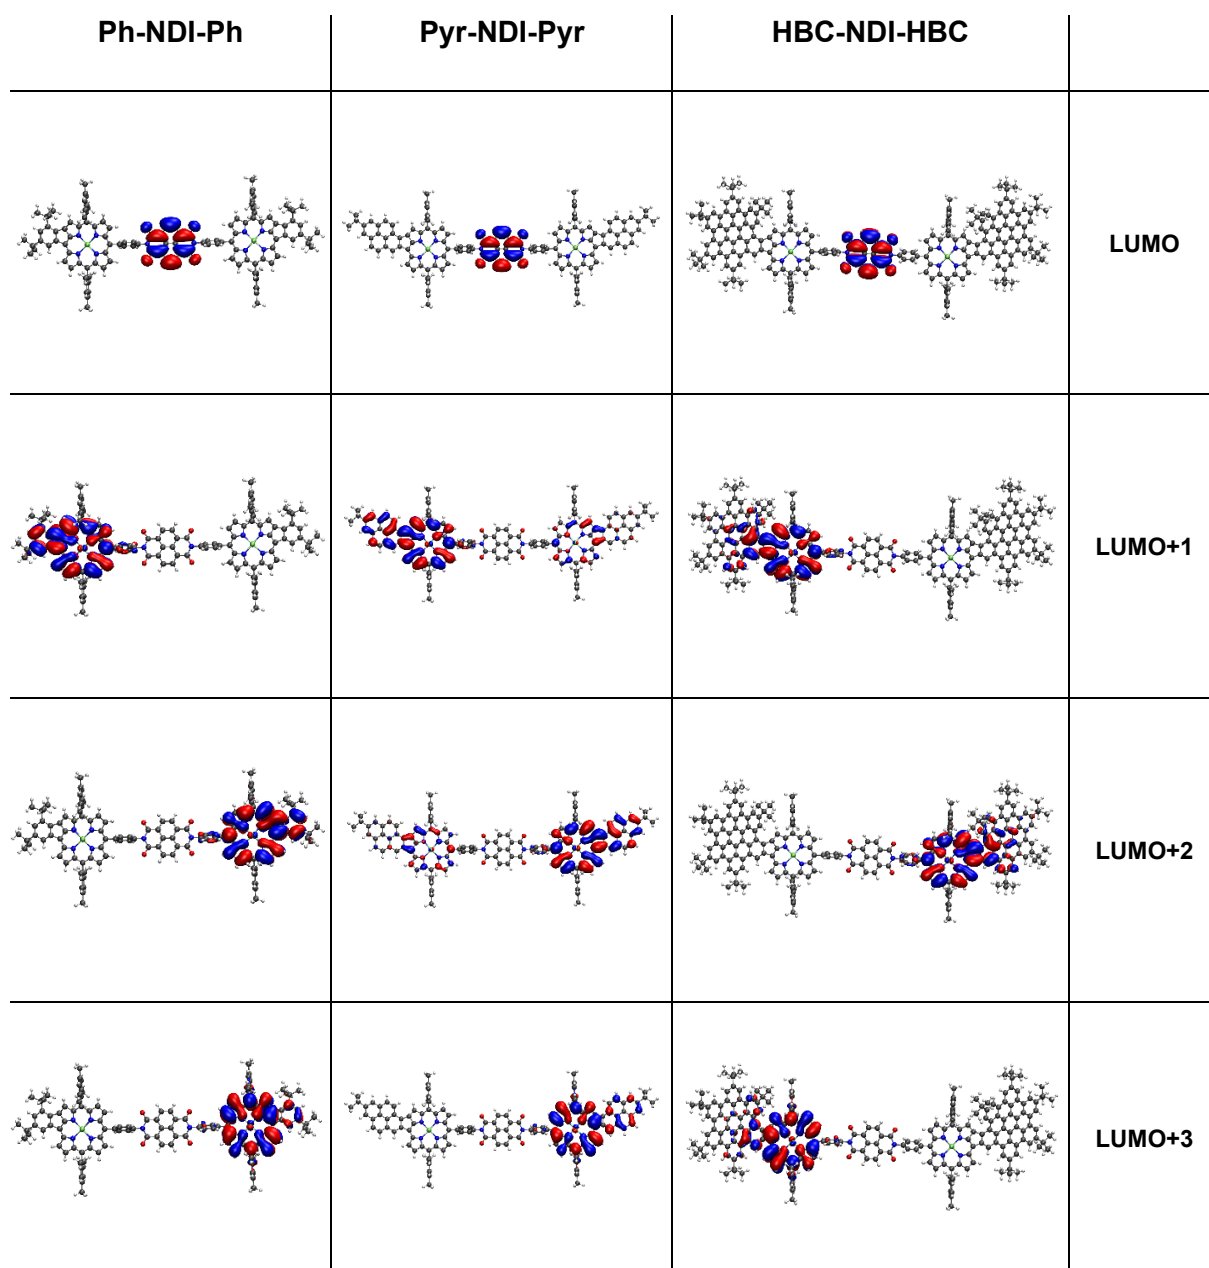

**Figure S121.** Geometry optimized structures and orbitals of **Ph-NDI-Ph**, **Pyr-NDI-Pyr**, and **HBC-NDI-HBC**.

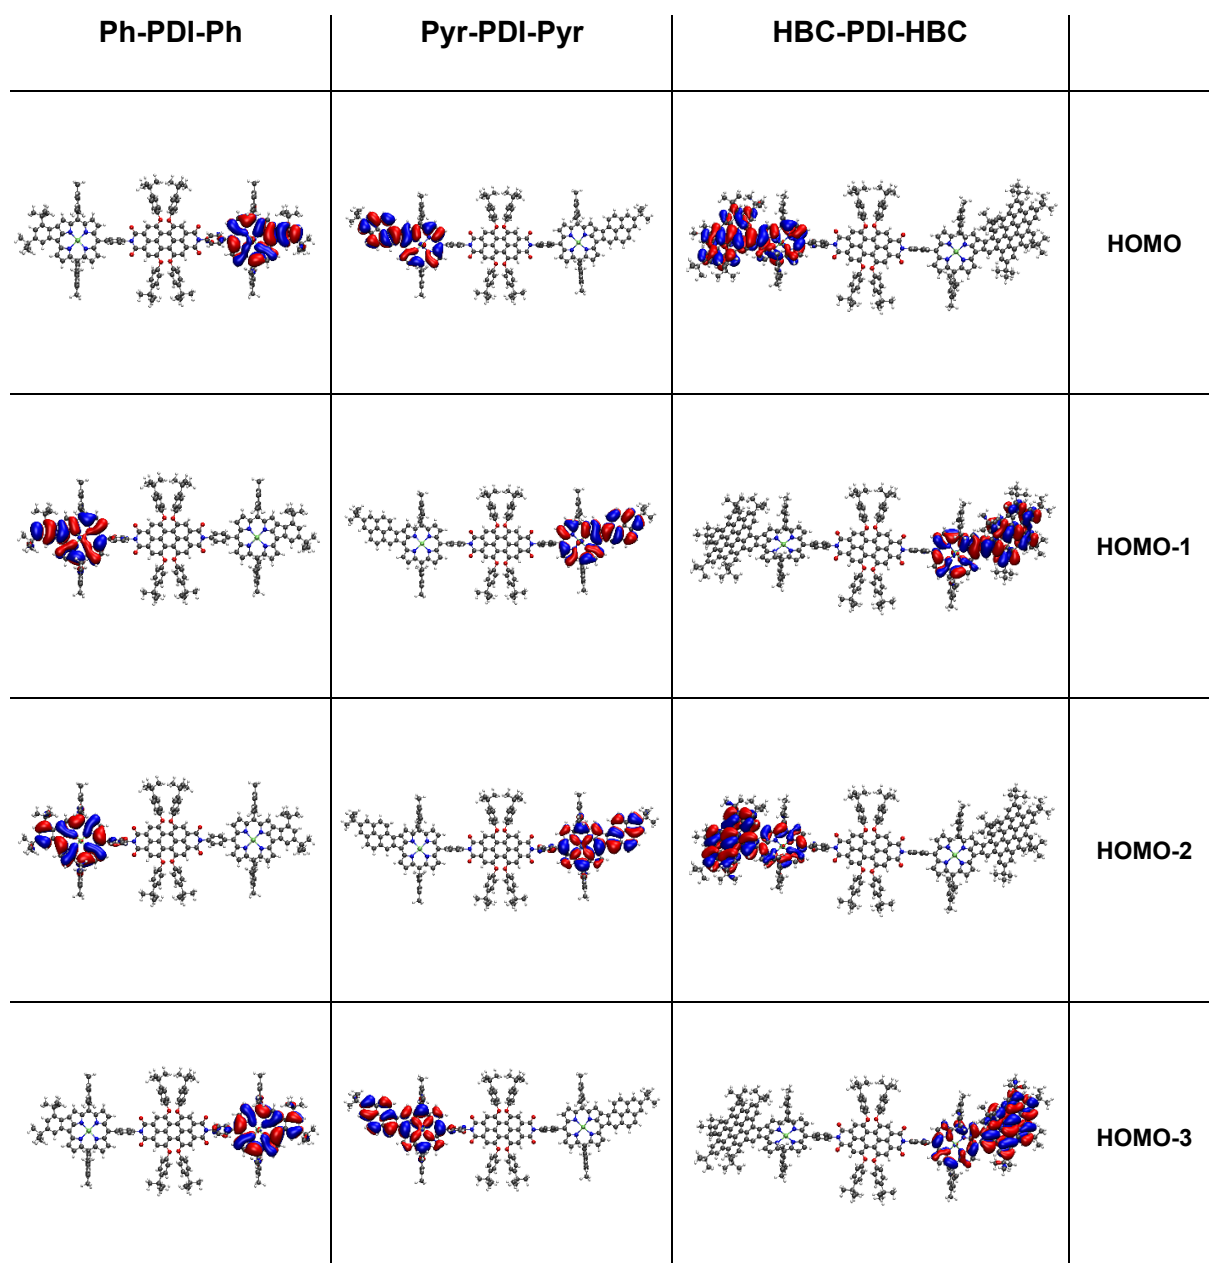

**Figure S122.** Geometry optimized structures and orbitals of **Ph-PDI-Ph**, **Pyr-PDI-Pyr**, and **HBC-PDI-HBC**.

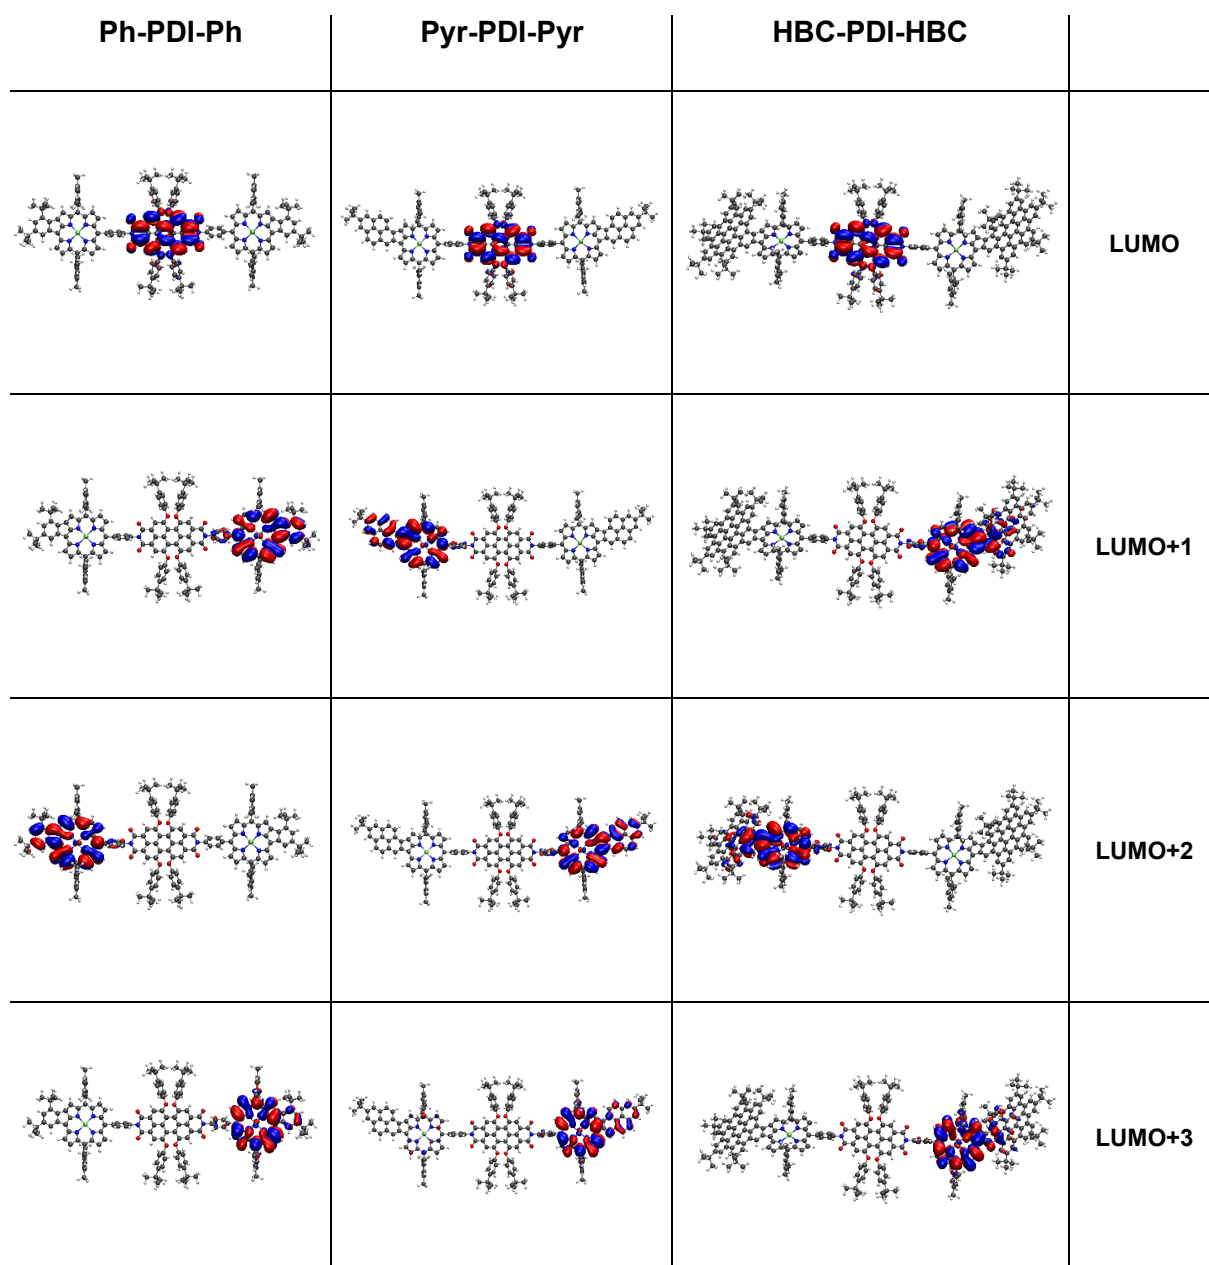

**Figure S123.** Geometry optimized structures and orbitals of **Ph-PDI-Ph**, **Pyr-PDI-Pyr**, and **HBC-PDI-HBC**.



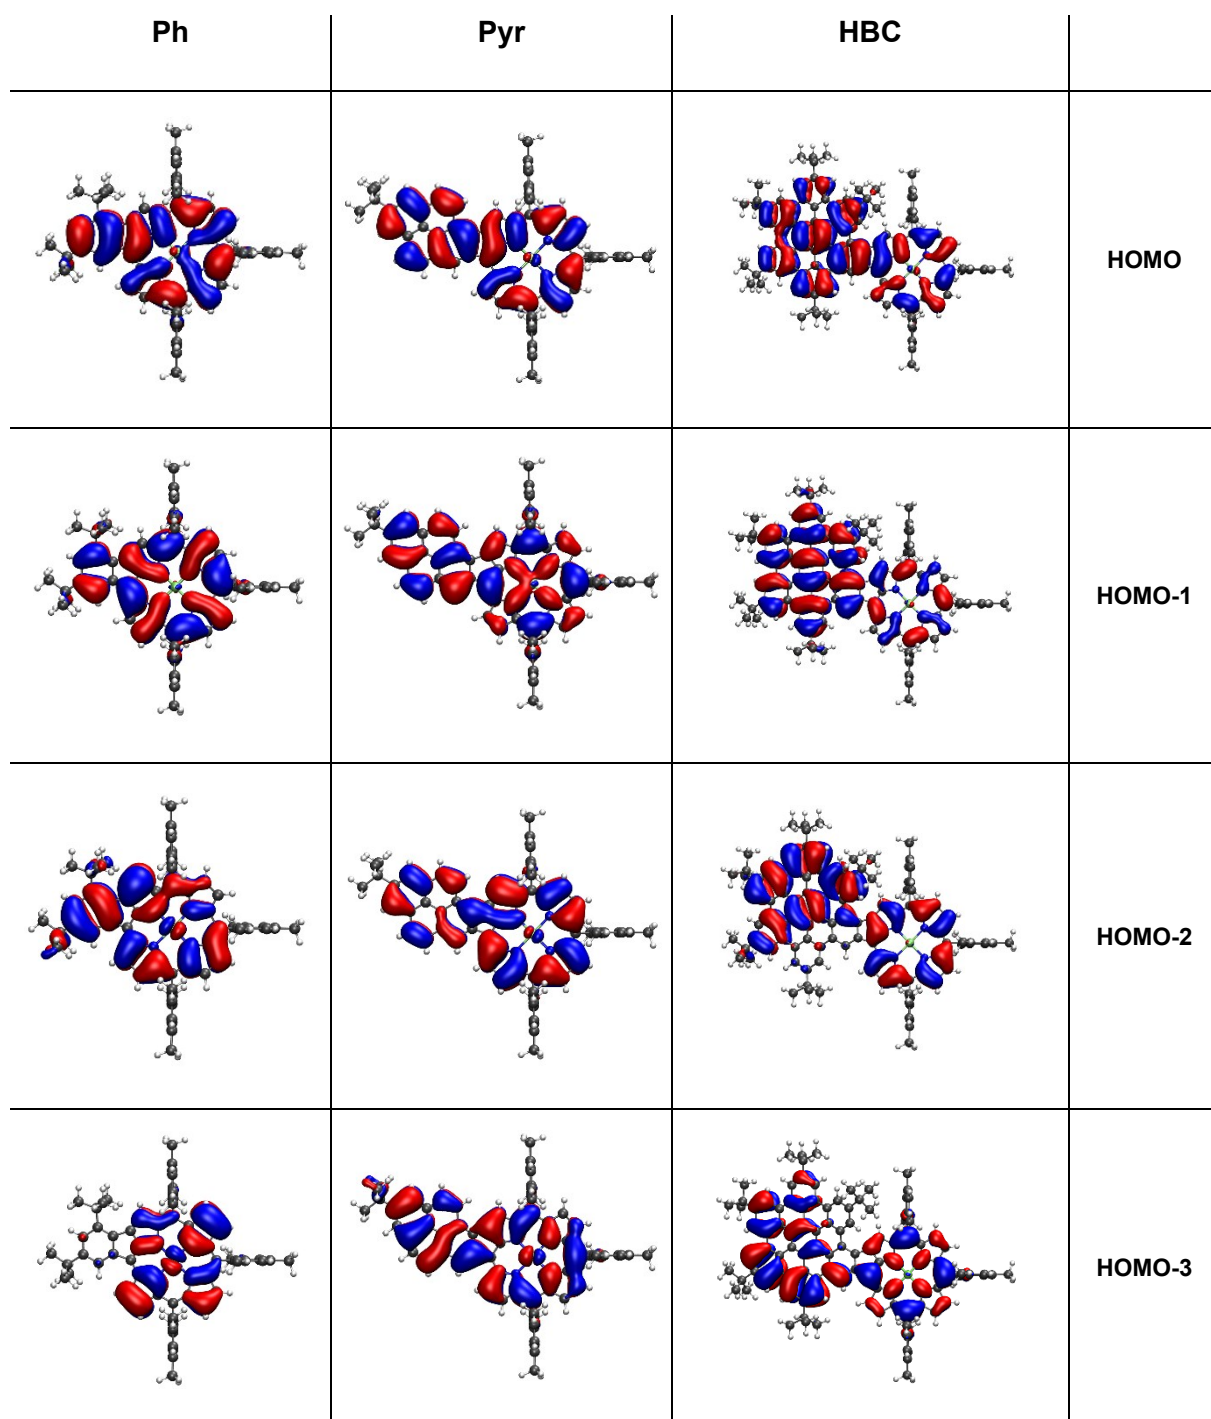

**Figure S124.** Geometry optimized structures and orbitals of **Ph**, **Pyr**, and **HBC**.

| Ph                                                                                  | Pyr                                                                                 | HBC                                                                                  |        |
|-------------------------------------------------------------------------------------|-------------------------------------------------------------------------------------|--------------------------------------------------------------------------------------|--------|
| 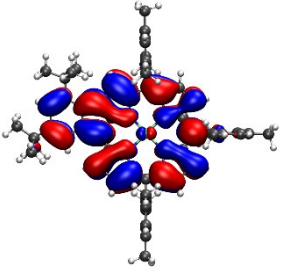   |    |    | LUMO   |
|    |    |    | LUMO+1 |
|   |   |   | LUMO+2 |
|  |  |  | LUMO+3 |

Figure S125. Geometry optimized structures and orbitals of Ph, Pyr, and HBC.

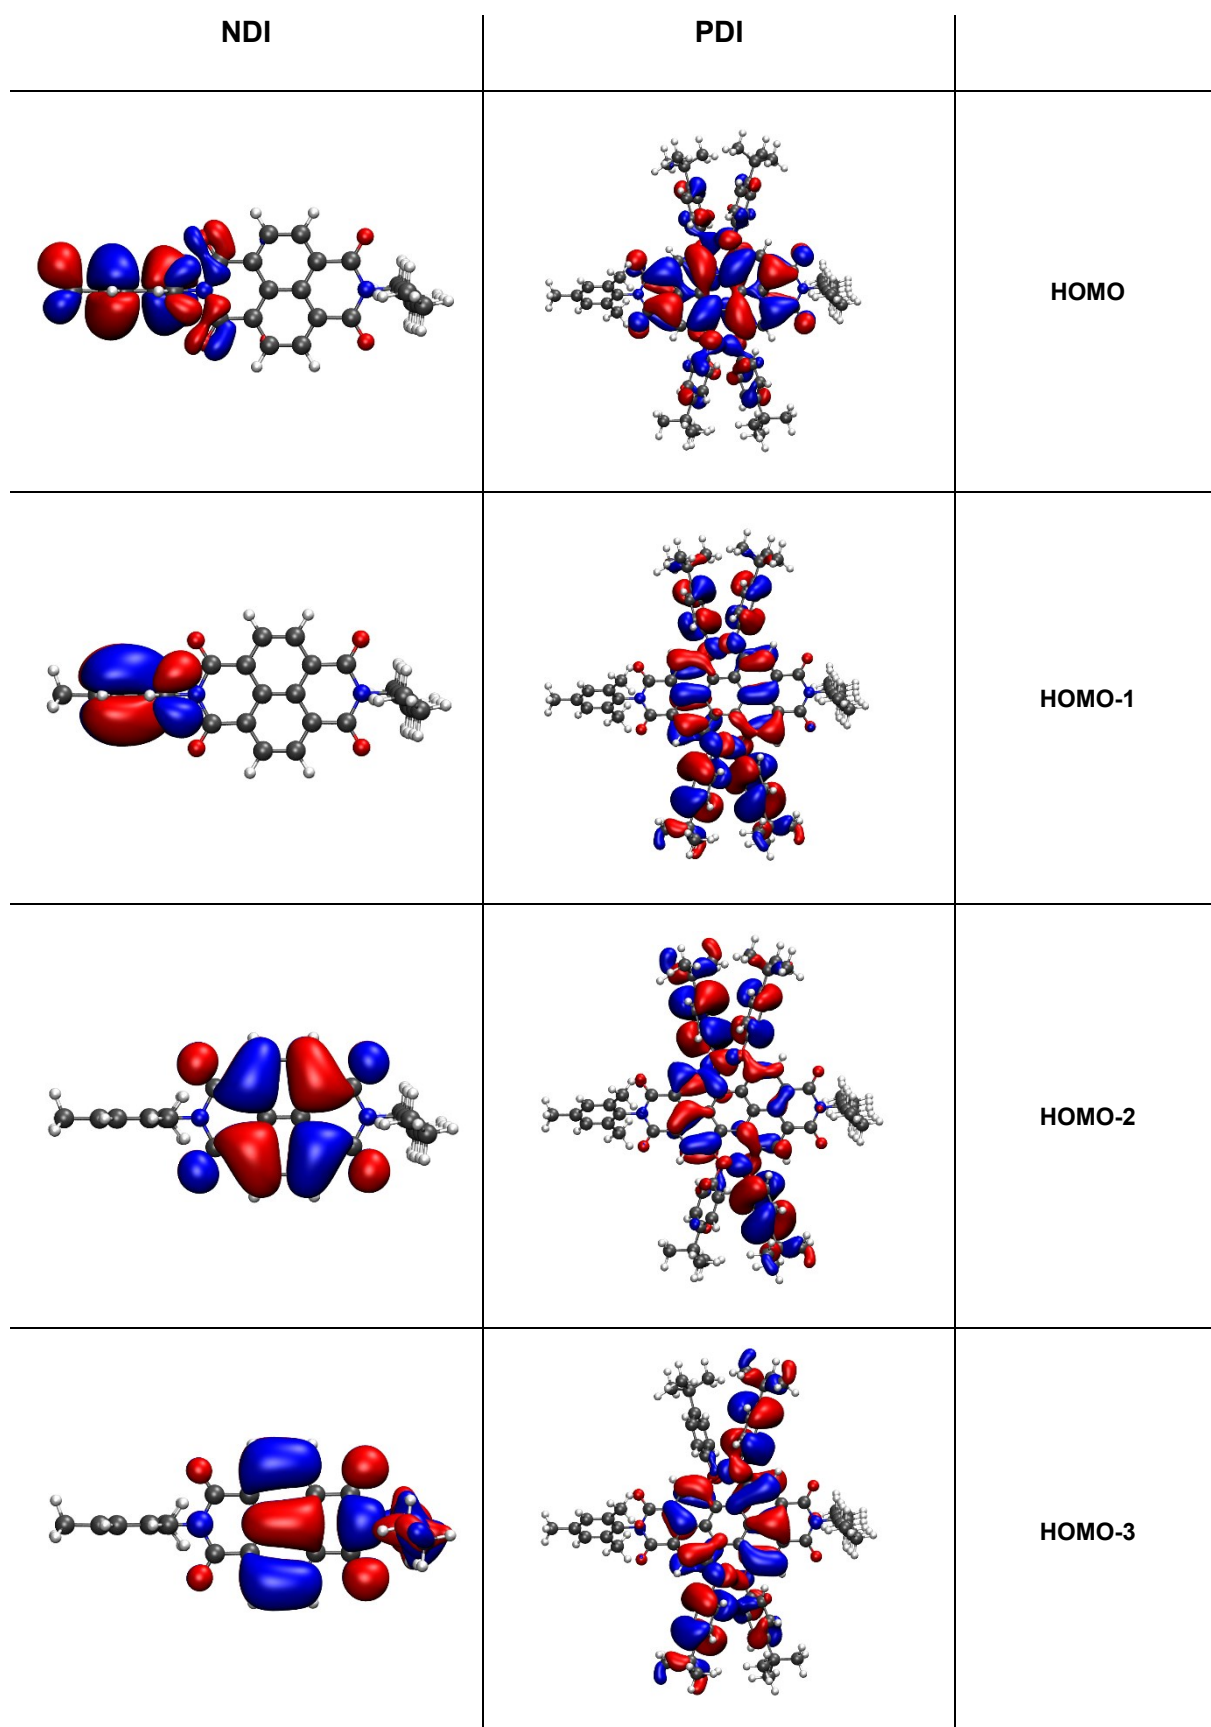

**Figure S126.** Geometry optimized structures and orbitals of **NDI** and **PDI**.

| NDI                                                                                 | PDI                                                                                  |        |
|-------------------------------------------------------------------------------------|--------------------------------------------------------------------------------------|--------|
| 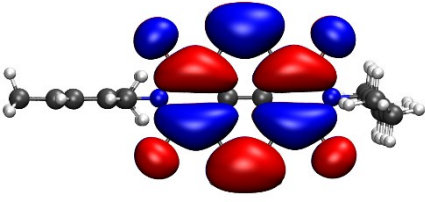   |    | LUMO   |
|   |   | LUMO+1 |
|  |  | LUMO+2 |
|  |  | LUMO+3 |

Figure S127. Geometry optimized structures and orbitals of NDI and PDI.

**Table S1.** Energy eigenvalues of selected orbitals of **Ph-NDI**, **Pyr-NDI**, **HBC-NDI**, **Ph-PDI**, **Pyr-PDI**, and **HBC-PDI**.

|         | <b>Ph-NDI</b> | <b>Pyr-NDI</b> | <b>HBC-NDI</b> | <b>Ph-PDI</b> | <b>Pyr-PDI</b> | <b>HBC-PDI</b> |
|---------|---------------|----------------|----------------|---------------|----------------|----------------|
| Orbital | Energy (eV)   | Energy (eV)    | Energy (eV)    | Energy (eV)   | Energy (eV)    | Energy (eV)    |
| HOMO-3  | -6.354        | -6.275         | -5.608         | -5.990        | -5.773         | -5.567         |
| HOMO-2  | -5.999        | -5.777         | -5.504         | -5.565        | -5.571         | -5.499         |
| HOMO-1  | -5.517        | -5.395         | -5.255         | -5.511        | -5.394         | -5.248         |
| HOMO    | -5.213        | -5.131         | -5.061         | -5.203        | -5.127         | -5.057         |
| LUMO    | -3.548        | -3.550         | -3.557         | -3.370        | -3.372         | -3.375         |
| LUMO+1  | -2.781        | -2.870         | -2.885         | -2.768        | -2.858         | -2.873         |
| LUMO+2  | -2.496        | -2.556         | -2.560         | -2.485        | -2.545         | -2.549         |
| LUMO+3  | -1.864        | -1.868         | -1.872         | -2.189        | -2.193         | -2.194         |
| GAP     | 1.665         | 1.581          | 1.504          | 1.833         | 1.754          | 1.682          |

**Table S2.** Energy eigenvalues of selected orbitals of **Ph-NDI-Ph**, **Pyr-NDI-Pyr**, **HBC-NDI-HBC**, **Ph-PDI-Ph**, **Pyr-PDI-Pyr**, and **HBC-PDI-HBC**.

|         | <b>Ph-NDI-Ph</b> | <b>Pyr-NDI-Pyr</b> | <b>HBC-NDI-HBC</b> | <b>Ph-PDI-Ph</b> | <b>Pyr-PDI-Pyr</b> | <b>HBC-PDI-HBC</b> |
|---------|------------------|--------------------|--------------------|------------------|--------------------|--------------------|
| Orbital | Energy (eV)      | Energy (eV)        | Energy (eV)        | Energy (eV)      | Energy (eV)        | Energy (eV)        |
| HOMO-3  | -5.525           | -5.406             | -5.255             | -5.511           | -5.389             | -5.250             |
| HOMO-2  | -5.524           | -5.406             | -5.254             | -5.506           | -5.389             | -5.248             |
| HOMO-1  | -5.213           | -5.134             | -5.060             | -5.205           | -5.127             | -5.054             |
| HOMO    | -5.212           | -5.133             | -5.059             | -5.201           | -5.126             | -5.053             |
| LUMO    | -3.607           | -3.615             | -3.616             | -3.405           | -3.409             | -3.405             |
| LUMO+1  | -2.783           | -2.869             | -2.886             | -2.771           | -2.857             | -2.877             |
| LUMO+2  | -2.782           | -2.869             | -2.884             | -2.766           | -2.856             | -2.873             |
| LUMO+3  | -2.496           | -2.556             | -2.561             | -2.486           | -2.545             | -2.550             |
| GAP     | 1.604            | 1.518              | 1.443              | 1.795            | 1.717              | 1.648              |

**Table S3.** Energy eigenvalues of selected orbitals of **Ph**, **Pyr**, **HBC**, **NDI**, and **PDI**.

|         | <b>Ph</b>   | <b>Pyr</b>  | <b>HBC</b>  | <b>NDI</b>  | <b>PDI</b>  |
|---------|-------------|-------------|-------------|-------------|-------------|
| Orbital | Energy (eV) | Energy (eV) | Energy (eV) | Energy (eV) | Energy (eV) |
| HOMO-3  | -6.333      | -6.264      | -5.595      | -7.545      | -6.288      |
| HOMO-2  | -5.981      | -5.757      | -5.493      | -7.015      | -6.219      |
| HOMO-1  | -5.497      | -5.383      | -5.247      | -6.683      | -6.000      |
| HOMO    | -5.192      | -5.116      | -5.052      | -6.644      | -5.560      |
| LUMO    | -2.750      | -2.841      | -2.858      | -3.525      | -3.359      |
| LUMO+1  | -2.466      | -2.527      | -2.533      | -1.817      | -2.182      |
| LUMO+2  | -1.614      | -1.761      | -1.825      | -1.283      | -1.798      |
| LUMO+3  | -1.312      | -1.657      | -1.797      | -1.262      | -1.031      |
| GAP     | 2.442       | 2.275       | 2.194       | 3.118       | 2.201       |

## 5 References

- [1] Q. Chen, L. Brambilla, L. Daukiya, K. S. Mali, S. de Feyter, M. Tommasini, K. Müllen, A. Narita, *Angew. Chemie, Int. Ed. Engl.* **2018**, *57*, 11233.
- [2] R. Mishra, R. Regar, R. Singhal, P. Panini, G. D. Sharma, J. Sankar, *J. Mater. Chem. A* **2017**, *5*, 15529.
- [3] D. N. Coventry, A. S. Batsanov, A. E. Goeta, J. A. K. Howard, T. B. Marder, R. N. Perutz, *Chem. Commun.* **2005**, 2172.
- [4] E. K. Perttu, M. Arnold, P. M. Iovine, *Tetrahedron* **2005**, *46*, 8753.
- [5] M. M. Martin, D. Lungerich, P. Haines, F. Hampel, N. Jux, *Angew. Chemie, Int. Ed. Engl.* **2019**, *58*, 8932.
- [6] M. M. Martin, C. Dusold, A. Hirsch, N. Jux, *J. Porphyrins Phthalocyanines* **2020**, *24*, 268.
- [7] E. L. Spitler, J. W. Colson, F. J. Uribe-Romo, A. R. Woll, M. R. Giovino, A. Saldivar, W. R. Dichtel, *Angew. Chemie, Int. Ed. Engl.* **2012**, *51*, 2623.
- [8] E. J. Schulze, C. L. Ritterhoff, E. Franz, O. Tavlui, O. Brummel, B. Meyer, A. Hirsch, *Chem. Eur. J.* **2024**, *30*, e202303515.
- [9] F. Schlosser, M. Moos, C. Lambert, F. Würthner, *Adv. Mater.* **2013**, *25*, 410.
- [10] P. Giannozzi, S. Baroni, N. Bonini, M. Calandra, R. Car, C. Cavazzoni, D. Ceresoli, G. L. Chiarotti, M. Cococcioni, I. Dabo *et al.*, *J. Phys. Condens. Matter* **2009**, *21*, 395502.
- [11] J. P. Perdew, K. Burke, M. Ernzerhof, *Phys. Rev. Lett.* **1996**, *77*, 3865–3868.
- [12] S. Grimme, S. Ehrlich, L. Goerigk, *J. Comput. Chem.* **2011**, *32*, 1456–1465.
- [13] S. Grimme, J. Antony, S. Ehrlich, H. Krieg, *J. Chem. Phys.* **2010**, *132*, 154104.
- [14] D. Vanderbilt, *Phys. Rev. B* **1990**, *41*, 7892–7895.
- [15] F. Neese, *WIREs Comput. Mol. Sci.* **2012**, *2*, 73–78.
- [16] A. D. Becke, *J. Chem. Phys.* **1993**, *98*, 1372–1377.
- [17] C. Lee, W. Yang, R. G. Parr, *Phys. Rev. B* **1988**, *37*, 785–789.
- [18] F. Weigend, R. Ahlrichs, *Phys. Chem. Chem. Phys.* **2005**, *7*, 3297.
- [19] F. Neese, F. Wennmohs, A. Hansen, U. Becker, *Chem. Phys.* **2009**, *356*, 98–109.
